# Supplementary material
Source: publisher figshare collection journal article supplement (https://acs.figshare.com/ndownloader/files/24748233)
Supplement: Supplementary file 1 [file 24748233]

## Sheet: 31407_NetMHCpan S1 HLA4602 HLA1
Supplemental Table 3: Predicted binding score of peptides from the S1 spike glycoprotein of SARS-CoV-2 for HLA-B15:03 and HLA-B46:01, based on the NetMHCpan prediciton server. In red, the peptides that are predicted to be binders.
			HLA-B15:03							HLA-B46:01
Pos	Peptide	ID	core	icore	1-log50k	nM	Rank	Pos	Peptide	core	icore	1-log50k	nM	Rank	Ave	NB	MIN RANK
556	KKFLPFQQF	Sequence	KKFLPFQQF	KKFLPFQQF	0.9568	-99.9	0.0149	686	VASQSIIAY	VASQSIIAY	VASQSIIAY	0.2156	-99.9	0.0278	0.5032	2	0.0278
893	LQIPFAMQM	Sequence	LQIPFAMQM	LQIPFAMQM	0.9192	-99.9	0.0353	191	FVFKNIDGY	FVFKNIDGY	FVFKNIDGY	0.2018	-99.9	0.033	0.365	2	0.033
442	SKVGGNYNY	Sequence	SKVGGNYNY	SKVGGNYNY	0.9112	-99.9	0.0392	1053	QSAPHGVVF	QSAPHGVVF	QSAPHGVVF	0.1818	-99.9	0.0431	0.5086	2	0.0431
918	NQKLIANQF	Sequence	NQKLIANQF	NQKLIANQF	0.8596	-99.9	0.0873	257	WTAGAAAYY	WTAGAAAYY	WTAGAAAYY	0.1373	-99.9	0.0758	0.1933	2	0.0758
998	GRLQSLQTY	Sequence	GRLQSLQTY	GRLQSLQTY	0.8486	-99.9	0.1014	159	YSSANNCTF	YSSANNCTF	YSSANNCTF	0.1332	-99.9	0.0795	0.2646	2	0.0795
1053	QSAPHGVVF	Sequence	QSAPHGVVF	QSAPHGVVF	0.8355	-99.9	0.1159	885	WTFGAGAAL	WTFGAGAAL	WTFGAGAAL	0.1324	-99.9	0.0802	0.2424	2	0.0802
76	KRFDNPVLPF	Sequence	KRFDNPVLF	KRFDNPVLPF	0.8296	-99.9	0.1224	698	LGAENSVAY	LGAENSVAY	LGAENSVAY	0.1136	-99.9	0.1007	0.3391	2	0.1007
496	FQPTNGVGY	Sequence	FQPTNGVGY	FQPTNGVGY	0.8242	-99.9	0.1282	211	LVRDLPQGF	LVRDLPQGF	LVRDLPQGF	0.113	-99.9	0.1018	0.3445	2	0.1018
326	VRFPNITNL	Sequence	VRFPNITNL	VRFPNITNL	0.8039	-99.9	0.1492	365	SVLYNSASF	SVLYNSASF	SVLYNSASF	0.0987	-99.9	0.1294	0.3009	2	0.1294
412	GQTGKIADY	Sequence	GQTGKIADY	GQTGKIADY	0.8037	-99.9	0.1494	717	FTISVTTEI	FTISVTTEI	FTISVTTEI	0.0952	-99.9	0.1398	0.0815	1	0.1398
788	YKTPPIKDF	Sequence	YKTPPIKDF	YKTPPIKDF	0.8036	-99.9	0.1495	709	NSIAIPTNF	NSIAIPTNF	NSIAIPTNF	0.0943	-99.9	0.1423	0.3197	2	0.1423
1086	AHFPREGVF	Sequence	AHFPREGVF	AHFPREGVF	0.7921	-99.9	0.1596	1094	FVSNGTHWF	FVSNGTHWF	FVSNGTHWF	0.0923	-99.9	0.1482	0.2202	2	0.1482
686	VASQSIIAY	Sequence	VASQSIIAY	VASQSIIAY	0.7907	-99.9	0.1607	891	AALQIPFAM	AALQIPFAM	AALQIPFAM	0.086	-99.9	0.1676	0.2676	2	0.1676
852	QKFNGLTVL	Sequence	QKFNGLTVL	QKFNGLTVL	0.7866	-99.9	0.1643	897	FAMQMAYRF	FAMQMAYRF	FAMQMAYRF	0.0854	-99.9	0.1696	0.2267	2	0.1696
1043	GKGYHLMSF	Sequence	GKGYHLMSF	GKGYHLMSF	0.7673	-99.9	0.1864	29	NSFTRGVYY	NSFTRGVYY	NSFTRGVYY	0.0784	-99.9	0.1914	0.2891	2	0.1914
688	SQSIIAYTM	Sequence	SQSIIAYTM	SQSIIAYTM	0.7655	-99.9	0.1894	879	GTITSGWTF	GTITSGWTF	GTITSGWTF	0.0771	-99.9	0.1955	0.2917	2	0.1955
368	YNSASFSTF	Sequence	YNSASFSTF	YNSASFSTF	0.7632	-99.9	0.1932	868	MIAQYTSAL	MIAQYTSAL	MIAQYTSAL	0.0767	-99.9	0.1966	0.12	1	0.1966
793	IKDFGGFNF	Sequence	IKDFGGFNF	IKDFGGFNF	0.7241	-99.9	0.2588	603	TSNQVAVLY	TSNQVAVLY	TSNQVAVLY	0.0742	-99.9	0.2069	0.2076	2	0.2069
633	RVYSTGSNVF	Sequence	RVYSGSNVF	RVYSTGSNVF	0.7212	-99.9	0.2636	633	RVYSTGSNVF	RVYSGSNVF	RVYSTGSNVF	0.0728	-99.9	0.2142	0.397	2	0.2142
19	TRTQLPPAY	Sequence	TRTQLPPAY	TRTQLPPAY	0.7211	-99.9	0.2637	391	FTNVYADSF	FTNVYADSF	FTNVYADSF	0.0717	-99.9	0.2198	0.1505	1	0.2198
338	GEVFNATRF	Sequence	GEVFNATRF	GEVFNATRF	0.7209	-99.9	0.2641	864	LTDEMIAQY	LTDEMIAQY	LTDEMIAQY	0.071	-99.9	0.2232	0.1428	1	0.2232
34	GVYYPDKVF	Sequence	GVYYPDKVF	GVYYPDKVF	0.6663	-99.9	0.3661	961	LVKQLSSNF	LVKQLSSNF	LVKQLSSNF	0.0702	-99.9	0.227	0.2207	2	0.227
183	GNFKNLREF	Sequence	GNFKNLREF	GNFKNLREF	0.6499	-99.9	0.399	950	VVNQNAQAL	VVNQNAQAL	VVNQNAQAL	0.0643	-99.9	0.2587	0.133	1	0.2587
21	TQLPPAYTNSF	Sequence	TQLPPTNSF	TQLPPAYTNSF	0.6455	-99.9	0.4073	34	GVYYPDKVF	GVYYPDKVF	GVYYPDKVF	0.054	-99.9	0.3314	0.3601	2	0.3314
266	VGYLQPRTF	Sequence	VGYLQPRTF	VGYLQPRTF	0.643	-99.9	0.4121	711	IAIPTNFTI	IAIPTNFTI	IAIPTNFTI	0.0536	-99.9	0.334	0.1315	1	0.334
239	TLLALHRSY	Sequence	TLLALHRSY	TLLALHRSY	0.6413	-99.9	0.4152	1112	QIITTDNTF	QIITTDNTF	QIITTDNTF	0.0529	-99.9	0.3399	0.2787	2	0.3399
463	FERDISTEIY	Sequence	FERDISTEY	FERDISTEIY	0.635	-99.9	0.4271	690	SIIAYTMSL	SIIAYTMSL	SIIAYTMSL	0.0523	-99.9	0.3448	0.1286	1	0.3448
814	RSFIEDLLF	Sequence	RSFIEDLLF	RSFIEDLLF	0.624	-99.9	0.4478	161	SANNCTFEY	SANNCTFEY	SANNCTFEY	0.0511	-99.9	0.3547	0.1399	1	0.3547
1263	VLKGVKLHY	Sequence	VLKGVKLHY	VLKGVKLHY	0.6224	-99.9	0.4509	1263	VLKGVKLHY	VLKGVKLHY	VLKGVKLHY	0.0509	-99.9	0.3561	0.3367	2	0.3561
851	AQKFNGLTV	Sequence	AQKFNGLTV	AQKFNGLTV	0.6121	-99.9	0.4703	893	LQIPFAMQM	LQIPFAMQM	LQIPFAMQM	0.0484	-99.9	0.376	0.4838	2	0.0353
235	TRFQTLLAL	Sequence	TRFQTLLAL	TRFQTLLAL	0.608	-99.9	0.478	1129	IGIVNNTVY	IGIVNNTVY	IGIVNNTVY	0.0477	-99.9	0.3817	0.2851	2	0.3817
344	TRFASVYAW	Sequence	TRFASVYAW	TRFASVYAW	0.6042	-99.9	0.4851	203	YSKHTPINL	YSKHTPINL	YSKHTPINL	0.0466	-99.9	0.3911	0.0991	1	0.3911
407	RQIAPGQTG	Sequence	RQIAPGQTG	RQIAPGQTG	0.5804	-99.9	0.5365	975	VLNDILSRL	VLNDILSRL	VLNDILSRL	0.0462	-99.9	0.394	0.1179	1	0.394
211	LVRDLPQGF	Sequence	LVRDLPQGF	LVRDLPQGF	0.576	-99.9	0.5465	895	IPFAMQMAY	IPFAMQMAY	IPFAMQMAY	0.0461	-99.9	0.3952	0.2711	2	0.3952
851	AQKFNGLTVL	Sequence	AQFNGLTVL	AQKFNGLTVL	0.5743	-99.9	0.5503	268	YLQPRTFLL	YLQPRTFLL	YLQPRTFLL	0.0459	-99.9	0.3967	0.0916	1	0.3967
698	LGAENSVAY	Sequence	LGAENSVAY	LGAENSVAY	0.5647	-99.9	0.5723	49	STQDLFLPF	STQDLFLPF	STQDLFLPF	0.0443	-99.9	0.4139	0.1884	2	0.4139
709	NSIAIPTNF	Sequence	NSIAIPTNF	NSIAIPTNF	0.5451	-99.9	0.6214	814	RSFIEDLLF	RSFIEDLLF	RSFIEDLLF	0.044	-99.9	0.418	0.334	2	0.418
892	ALQIPFAMQM	Sequence	AQIPFAMQM	ALQIPFAMQM	0.5298	-99.9	0.6652	266	VGYLQPRTF	VGYLQPRTF	VGYLQPRTF	0.0416	-99.9	0.4461	0.3423	2	0.4121
191	FVFKNIDGY	Sequence	FVFKNIDGY	FVFKNIDGY	0.5282	-99.9	0.6699	496	FQPTNGVGY	FQPTNGVGY	FQPTNGVGY	0.0386	-99.9	0.4818	0.4314	2	0.1282
319	VQPTESIVRF	Sequence	VQTESIVRF	VQPTESIVRF	0.5258	-99.9	0.6769	27	YTNSFTRGVY	YTNSTRGVY	YTNSFTRGVY	0.0382	-99.9	0.4868	0.0648	1	0.4868
46	VLHSTQDLF	Sequence	VLHSTQDLF	VLHSTQDLF	0.5243	-99.9	0.681	1020	SANLAATKM	SANLAATKM	SANLAATKM	0.0381	-99.9	0.488	0.1567	2	0.488
455	FRKSNLKPF	Sequence	FRKSNLKPF	FRKSNLKPF	0.5235	-99.9	0.6833	83	LPFNDGVYF	LPFNDGVYF	LPFNDGVYF	0.0378	-99.9	0.4917	0.2643	2	0.4917
1129	IGIVNNTVY	Sequence	IGIVNNTVY	IGIVNNTVY	0.5224	-99.9	0.6865	260	GAAAYYVGY	GAAAYYVGY	GAAAYYVGY	0.0329	-99.9	0.5595	0.2739	2	0.5595
185	FKNLREFVF	Sequence	FKNLREFVF	FKNLREFVF	0.5195	-99.9	0.6949	191	FVFKNIDGYF	FVFKNIDYF	FVFKNIDGYF	0.0321	-99.9	0.5707	0.0562	1	0.5707
260	GAAAYYVGY	Sequence	GAAAYYVGY	GAAAYYVGY	0.5148	-99.9	0.7077	82	VLPFNDGVY	VLPFNDGVY	VLPFNDGVY	0.0321	-99.9	0.5709	0.1423	2	0.5709
627	QLTPTWRVY	Sequence	QLTPTWRVY	QLTPTWRVY	0.5065	-99.9	0.7292	685	SVASQSIIAY	SVASSIIAY	SVASQSIIAY	0.0318	-99.9	0.5751	0.1355	2	0.5751
879	GTITSGWTF	Sequence	GTITSGWTF	GTITSGWTF	0.5063	-99.9	0.7297	665	IGAGICASY	IGAGICASY	IGAGICASY	0.0317	-99.9	0.5769	0.1456	2	0.5769
1112	QIITTDNTF	Sequence	QIITTDNTF	QIITTDNTF	0.5046	-99.9	0.7342	364	YSVLYNSASF	YSVYNSASF	YSVLYNSASF	0.0315	-99.9	0.58	0.0646	1	0.58
1200	QELGKYEQY	Sequence	QELGKYEQY	QELGKYEQY	0.5043	-99.9	0.7349	697	SLGAENSVAY	SLAENSVAY	SLGAENSVAY	0.0302	-99.9	0.5985	0.1817	2	0.5985
365	SVLYNSASF	Sequence	SVLYNSASF	SVLYNSASF	0.5032	-99.9	0.738	624	HADQLTPTW	HADQLTPTW	HADQLTPTW	0.0281	-99.9	0.6519	0.0975	1	0.6519
29	NSFTRGVYY	Sequence	NSFTRGVYY	NSFTRGVYY	0.4997	-99.9	0.7469	651	GAEHVNNSY	GAEHVNNSY	GAEHVNNSY	0.0278	-99.9	0.6585	0.1742	2	0.6585
504	YQPYRVVVL	Sequence	YQPYRVVVL	YQPYRVVVL	0.4985	-99.9	0.7501	360	CVADYSVLY	CVADYSVLY	CVADYSVLY	0.0272	-99.9	0.6735	0.0986	1	0.6735
895	IPFAMQMAY	Sequence	IPFAMQMAY	IPFAMQMAY	0.4962	-99.9	0.7561	939	STASALGKL	STASALGKL	STASALGKL	0.0262	-99.9	0.698	0.0332	1	0.698
828	ADAGFIKQY	Sequence	ADAGFIKQY	ADAGFIKQY	0.4926	-99.9	0.7654	342	NATRFASVY	NATRFASVY	NATRFASVY	0.0258	-99.9	0.7123	0.1248	1	0.7123
83	LPFNDGVYF	Sequence	LPFNDGVYF	LPFNDGVYF	0.4909	-99.9	0.77	1224	IAIVMVTIM	IAIVMVTIM	IAIVMVTIM	0.0257	-99.9	0.7153	0.0735	1	0.7153
1003	LQTYVTQQL	Sequence	LQTYVTQQL	LQTYVTQQL	0.4888	-99.9	0.7753	265	YVGYLQPRTF	YVYLQPRTF	YVGYLQPRTF	0.0255	-99.9	0.7224	0.1108	1	0.7224
652	AEHVNNSY	Sequence	AEH-VNNSY	AEHVNNSY	0.4886	-99.9	0.776	416	KIADYNYKL	KIADYNYKL	KIADYNYKL	0.0254	-99.9	0.7256	0.0884	1	0.7256
77	RFDNPVLPF	Sequence	RFDNPVLPF	RFDNPVLPF	0.4732	-99.9	0.8165	627	QLTPTWRVY	QLTPTWRVY	QLTPTWRVY	0.0244	-99.9	0.7612	0.2655	2	0.7292
1203	GKYEQYIKW	Sequence	GKYEQYIKW	GKYEQYIKW	0.4699	-99.9	0.8253	1058	GVVFLHVTY	GVVFLHVTY	GVVFLHVTY	0.0235	-99.9	0.7915	0.1464	2	0.7915
151	WMESEFRVY	Sequence	WMESEFRVY	WMESEFRVY	0.4653	-99.9	0.8374	309	KGIYQTSNF	KGIYQTSNF	KGIYQTSNF	0.0231	-99.9	0.8051	0.1932	2	0.8051
1015	AEIRASANL	Sequence	AEIRASANL	AEIRASANL	0.4566	-99.9	0.8607	77	RFDNPVLPF	RFDNPVLPF	RFDNPVLPF	0.0231	-99.9	0.8076	0.2481	2	0.8076
891	AALQIPFAM	Sequence	AALQIPFAM	AALQIPFAM	0.4491	-99.9	0.8807	160	SSANNCTFEY	SSANNTFEY	SSANNCTFEY	0.0217	-99.9	0.8519	0.0332	1	0.8519
1037	KRVDFCGKGY	Sequence	KRVDFGKGY	KRVDFCGKGY	0.4452	-99.9	0.8909	1013	RAAEIRASA	RAAEIRASA	RAAEIRASA	0.0211	-99.9	0.8737	0.0618	1	0.8737
893	LQIPFAMQMAY	Sequence	LQIPFQMAY	LQIPFAMQMAY	0.423	-99.9	0.9562	326	VRFPNITNL	VRFPNITNL	VRFPNITNL	0.0202	-99.9	0.9072	0.4121	2	0.1492
999	RLQSLQTY	Sequence	RLQ-SLQTY	RLQSLQTY	0.4218	-99.9	0.9597	780	VFAQVKQIY	VFAQVKQIY	VFAQVKQIY	0.02	-99.9	0.9148	0.2057	2	0.9148
870	AQYTSALLA	Sequence	AQYTSALLA	AQYTSALLA	0.4153	-99.9	0.9792	371	ASFSTFKCY	ASFSTFKCY	ASFSTFKCY	0.0195	-99.9	0.9395	0.1813	2	0.9395
550	VLTESNKKF	Sequence	VLTESNKKF	VLTESNKKF	0.4109	-99.9	0.9922	633	RVYSTGSNV	RVYSTGSNV	RVYSTGSNV	0.0194	-99.9	0.945	0.0964	1	0.945
333	NLCPFGEVF	Sequence	NLCPFGEVF	NLCPFGEVF	0.4085	-99.9	0.9995	1049	MSFPQSAPH	MSFPQSAPH	MSFPQSAPH	0.0193	-99.9	0.9529	0.0377	1	0.9529
82	VLPFNDGVYF	Sequence	VLFNDGVYF	VLPFNDGVYF	0.4036	-99.9	1.0178	46	VLHSTQDLF	VLHSTQDLF	VLHSTQDLF	0.0191	-99.9	0.96	0.2717	2	0.681
152	MESEFRVY	Sequence	MESEFR-VY	MESEFRVY	0.4012	-99.9	1.0271	239	TLLALHRSY	TLLALHRSY	TLLALHRSY	0.0189	-99.9	0.9734	0.3301	2	0.4152
463	FERDISTEI	Sequence	FERDISTEI	FERDISTEI	0.3976	-99.9	1.0407	824	KVTLADAGF	KVTLADAGF	KVTLADAGF	0.0184	-99.9	0.9937	0.1171	1	0.9937
366	VLYNSASF	Sequence	VLY-NSASF	VLYNSASF	0.3972	-99.9	1.0423	922	IANQFNSAI	IANQFNSAI	IANQFNSAI	0.0182	-99.9	1.0069	0.07	1	1.0069
159	YSSANNCTF	Sequence	YSSANNCTF	YSSANNCTF	0.3961	-99.9	1.0465	151	WMESEFRVY	WMESEFRVY	WMESEFRVY	0.0179	-99.9	1.0231	0.2416	2	0.8374
780	VFAQVKQIY	Sequence	VFAQVKQIY	VFAQVKQIY	0.3913	-99.9	1.0646	504	YQPYRVVVL	YQPYRVVVL	YQPYRVVVL	0.0179	-99.9	1.0233	0.2582	2	0.7501
355	KRISNCVADY	Sequence	KRISNVADY	KRISNCVADY	0.3883	-99.9	1.0761	368	YNSASFSTF	YNSASFSTF	YNSASFSTF	0.0171	-99.9	1.0748	0.3902	2	0.1932
997	TGRLQSLQTY	Sequence	TRLQSLQTY	TGRLQSLQTY	0.3867	-99.9	1.082	118	IVNNATNVV	IVNNATNVV	IVNNATNVV	0.0171	-99.9	1.0781	0.05	1	1.0781
420	YNYKLPDDF	Sequence	YNYKLPDDF	YNYKLPDDF	0.3865	-99.9	1.0826	696	MSLGAENSVAY	MSAENSVAY	MSLGAENSVAY	0.0168	-99.9	1.0966	0.0318	1	1.0966
1180	KEIDRLNEV	Sequence	KEIDRLNEV	KEIDRLNEV	0.3766	-99.9	1.1178	220	SALEPLVDL	SALEPLVDL	SALEPLVDL	0.0165	-99.9	1.1092	0.0539	1	1.1092
961	LVKQLSSNF	Sequence	LVKQLSSNF	LVKQLSSNF	0.3712	-99.9	1.1362	256	GWTAGAAAYY	GTAGAAAYY	GWTAGAAAYY	0.0153	-99.9	1.1817	0.0265	1	1.1817
897	FAMQMAYRF	Sequence	FAMQMAYRF	FAMQMAYRF	0.3679	-99.9	1.1472	1093	VFVSNGTHW	VFVSNGTHW	VFVSNGTHW	0.0148	-99.9	1.2156	0.0672	1	1.2156
317	FRVQPTESI	Sequence	FRVQPTESI	FRVQPTESI	0.3638	-99.9	1.1609	936	SLSSTASAL	SLSSTASAL	SLSSTASAL	0.0148	-99.9	1.2212	0.0912	1	1.2212
309	KGIYQTSNF	Sequence	KGIYQTSNF	KGIYQTSNF	0.3634	-99.9	1.1625	432	VIAWNSNNL	VIAWNSNNL	VIAWNSNNL	0.0147	-99.9	1.2251	0.0154	1	1.2251
785	KQIYKTPPI	Sequence	KQIYKTPPI	KQIYKTPPI	0.3623	-99.9	1.1662	634	VYSTGSNVF	VYSTGSNVF	VYSTGSNVF	0.0145	-99.9	1.2442	0.1424	2	1.2442
1052	PQSAPHGVVF	Sequence	PQAPHGVVF	PQSAPHGVVF	0.3581	-99.9	1.1803	33	RGVYYPDKVF	RVYYPDKVF	RGVYYPDKVF	0.0144	-99.9	1.2488	0.1749	2	1.2488
870	AQYTSALL	Sequence	AQY-TSALL	AQYTSALL	0.3529	-99.9	1.1977	257	WTAGAAAY	WTA-GAAAY	WTAGAAAY	0.0143	-99.9	1.2583	0.047	1	1.2583
885	WTFGAGAAL	Sequence	WTFGAGAAL	WTFGAGAAL	0.3524	-99.9	1.1993	192	VFKNIDGYF	VFKNIDGYF	VFKNIDGYF	0.0142	-99.9	1.2672	0.1271	2	1.2672
407	RQIAPGQT	Sequence	RQIAPGQT-	RQIAPGQT	0.3518	-99.9	1.2019	28	TNSFTRGVYY	TSFTRGVYY	TNSFTRGVYY	0.0142	-99.9	1.2677	0.0617	1	1.2677
1094	FVSNGTHWF	Sequence	FVSNGTHWF	FVSNGTHWF	0.3482	-99.9	1.2192	1066	YVPAQEKNF	YVPAQEKNF	YVPAQEKNF	0.0141	-99.9	1.2805	0.0462	1	1.2805
371	ASFSTFKCY	Sequence	ASFSTFKCY	ASFSTFKCY	0.343	-99.9	1.244	325	IVRFPNITNL	IVFPNITNL	IVRFPNITNL	0.0139	-99.9	1.2937	0.1126	1	1.2937
603	TSNQVAVLY	Sequence	TSNQVAVLY	TSNQVAVLY	0.341	-99.9	1.2535	108	TLDSKTQSL	TLDSKTQSL	TLDSKTQSL	0.0136	-99.9	1.3246	0.0508	1	1.3246
75	TKRFDNPVL	Sequence	TKRFDNPVL	TKRFDNPVL	0.3385	-99.9	1.2653	1054	SAPHGVVFL	SAPHGVVFL	SAPHGVVFL	0.0135	-99.9	1.3349	0.0161	1	1.3349
194	KNIDGYFKIY	Sequence	KNIDGFKIY	KNIDGYFKIY	0.3357	-99.9	1.2786	305	FTVEKGIY	FTVEKGI-Y	FTVEKGIY	0.0132	-99.9	1.354	0.0418	1	1.354
33	RGVYYPDKVF	Sequence	RVYYPDKVF	RGVYYPDKVF	0.3354	-99.9	1.2802	908	IGVTQNVLY	IGVTQNVLY	IGVTQNVLY	0.0132	-99.9	1.3619	0.1431	2	1.3619
697	SLGAENSVAY	Sequence	SLAENSVAY	SLGAENSVAY	0.3332	-99.9	1.2904	583	ILDITPCSF	ILDITPCSF	ILDITPCSF	0.0131	-99.9	1.3638	0.1693	2	1.3296
49	STQDLFLPF	Sequence	STQDLFLPF	STQDLFLPF	0.3325	-99.9	1.2938	23	LPPAYTNSF	LPPAYTNSF	LPPAYTNSF	0.0129	-99.9	1.3891	0.0838	1	1.3891
990	VQIDRLITG	Sequence	VQIDRLITG	VQIDRLITG	0.328	-99.9	1.3163	1136	VYDPLQPEL	VYDPLQPEL	VYDPLQPEL	0.0128	-99.9	1.3988	0.0383	1	1.3988
583	ILDITPCSF	Sequence	ILDITPCSF	ILDITPCSF	0.3254	-99.9	1.3296	602	NTSNQVAVL	NTSNQVAVL	NTSNQVAVL	0.0125	-99.9	1.4183	0.0177	1	1.4183
464	ERDISTEIY	Sequence	ERDISTEIY	ERDISTEIY	0.3231	-99.9	1.3411	688	SQSIIAYTM	SQSIIAYTM	SQSIIAYTM	0.0124	-99.9	1.4276	0.389	2	0.1894
651	GAEHVNNSY	Sequence	GAEHVNNSY	GAEHVNNSY	0.3205	-99.9	1.3542	143	YYHKNNKSW	YYHKNNKSW	YYHKNNKSW	0.0123	-99.9	1.4408	0.0481	1	1.4408
575	VRDPQTLEI	Sequence	VRDPQTLEI	VRDPQTLEI	0.3193	-99.9	1.3606	55	LPFFSNVTW	LPFFSNVTW	LPFFSNVTW	0.0123	-99.9	1.4426	0.0411	1	1.4426
507	YRVVVLSF	Sequence	YRV-VVLSF	YRVVVLSF	0.3157	-99.9	1.3786	1184	RLNEVAKNL	RLNEVAKNL	RLNEVAKNL	0.0121	-99.9	1.4543	0.1296	2	1.4543
1147	FKEELDKYF	Sequence	FKEELDKYF	FKEELDKYF	0.3121	-99.9	1.3969	344	TRFASVYAW	TRFASVYAW	TRFASVYAW	0.0121	-99.9	1.4599	0.3082	2	0.4851
181	KQGNFKNLREF	Sequence	KQFKNLREF	KQGNFKNLREF	0.3111	-99.9	1.4025	1051	FPQSAPHGVVF	FSAPHGVVF	FPQSAPHGVVF	0.012	-99.9	1.4651	0.0468	1	1.4651
626	DQLTPTWRVY	Sequence	DQLTPTRVY	DQLTPTWRVY	0.3068	-99.9	1.4325	532	LVKNKCVNF	LVKNKCVNF	LVKNKCVNF	0.012	-99.9	1.466	0.0472	1	1.466
1199	LQELGKYEQY	Sequence	LQLGKYEQY	LQELGKYEQY	0.3066	-99.9	1.4342	1127	VVIGIVNNTVY	VVIGNNTVY	VVIGIVNNTVY	0.0118	-99.9	1.4852	0.0478	1	1.4852
813	KRSFIEDLLF	Sequence	KRFIEDLLF	KRSFIEDLLF	0.3039	-99.9	1.4529	27	YTNSFTRGVYY	YTFTRGVYY	YTNSFTRGVYY	0.0118	-99.9	1.4866	0.0211	1	1.4866
167	FEYVSQPF	Sequence	FEY-VSQPF	FEYVSQPF	0.2967	-99.9	1.503	82	VLPFNDGVYF	VLFNDGVYF	VLPFNDGVYF	0.0114	-99.9	1.516	0.2075	2	1.0178
1085	KAHFPREGVF	Sequence	KHFPREGVF	KAHFPREGVF	0.2935	-99.9	1.5236	703	SVAYSNNSI	SVAYSNNSI	SVAYSNNSI	0.0114	-99.9	1.516	0.0292	1	1.516
276	LKYNENGTI	Sequence	LKYNENGTI	LKYNENGTI	0.2919	-99.9	1.5337	732	KTSVDCTMY	KTSVDCTMY	KTSVDCTMY	0.0114	-99.9	1.5165	0.0514	1	1.5165
683	ARSVASQSI	Sequence	ARSVASQSI	ARSVASQSI	0.2873	-99.9	1.5637	1080	ICHDGKAHF	ICHDGKAHF	ICHDGKAHF	0.011	-99.9	1.5655	0.1087	1	1.5655
97	SNIIRGWIF	Sequence	SNIIRGWIF	SNIIRGWIF	0.2858	-99.9	1.5732	343	ATRFASVY	ATR-FASVY	ATRFASVY	0.0109	-99.9	1.5717	0.0489	1	1.5717
1206	EQYIKWPWY	Sequence	EQYIKWPWY	EQYIKWPWY	0.2858	-99.9	1.5735	650	IGAEHVNNSY	IGAEVNNSY	IGAEHVNNSY	0.0109	-99.9	1.5765	0.1071	1	1.5765
101	RGWIFGTTL	Sequence	RGWIFGTTL	RGWIFGTTL	0.2841	-99.9	1.5845	1092	GVFVSNGTHW	GVFSNGTHW	GVFVSNGTHW	0.0109	-99.9	1.5787	0.0306	1	1.5787
495	GFQPTNGVGY	Sequence	GQPTNGVGY	GFQPTNGVGY	0.281	-99.9	1.6047	18	TTRTQLPPAY	TTRQLPPAY	TTRTQLPPAY	0.0106	-99.9	1.6031	0.115	1	1.6031
1020	SANLAATKM	Sequence	SANLAATKM	SANLAATKM	0.2753	-99.9	1.641	869	IAQYTSALL	IAQYTSALL	IAQYTSALL	0.0106	-99.9	1.6099	0.0288	1	1.6099
908	IGVTQNVLY	Sequence	IGVTQNVLY	IGVTQNVLY	0.273	-99.9	1.6556	463	FERDISTEI	FERDISTEI	FERDISTEI	0.0104	-99.9	1.6367	0.204	2	1.0407
634	VYSTGSNVF	Sequence	VYSTGSNVF	VYSTGSNVF	0.2703	-99.9	1.6729	550	VLTESNKKF	VLTESNKKF	VLTESNKKF	0.0103	-99.9	1.6432	0.2106	2	0.9922
1058	GVVFLHVTY	Sequence	GVVFLHVTY	GVVFLHVTY	0.2692	-99.9	1.6796	722	TTEILPVSM	TTEILPVSM	TTEILPVSM	0.0103	-99.9	1.6485	0.0255	1	1.6485
486	NCYFPLQSY	Sequence	NCYFPLQSY	NCYFPLQSY	0.267	-99.9	1.6937	76	KRFDNPVLPF	KRFDNPVLF	KRFDNPVLPF	0.0102	-99.9	1.6511	0.4199	2	0.1224
665	IGAGICASY	Sequence	IGAGICASY	IGAGICASY	0.2594	-99.9	1.7584	1188	VAKNLNESL	VAKNLNESL	VAKNLNESL	0.0101	-99.9	1.6699	0.0854	1	1.6699
167	FEYVSQPFL	Sequence	FEYVSQPFL	FEYVSQPFL	0.2534	-99.9	1.8115	261	AAAYYVGYL	AAAYYVGYL	AAAYYVGYL	0.0101	-99.9	1.6721	0.0273	1	1.6721
82	VLPFNDGVY	Sequence	VLPFNDGVY	VLPFNDGVY	0.2525	-99.9	1.819	1085	KAHFPREGVF	KAFPREGVF	KAHFPREGVF	0.0098	-99.9	1.7075	0.1516	2	1.5236
257	WTAGAAAYY	Sequence	WTAGAAAYY	WTAGAAAYY	0.2492	-99.9	1.8475	443	KVGGNYNYL	KVGGNYNYL	KVGGNYNYL	0.0095	-99.9	1.7454	0.0204	1	1.7454
50	TQDLFLPFF	Sequence	TQDLFLPFF	TQDLFLPFF	0.2487	-99.9	1.8518	1054	SAPHGVVF	SAPHG-VVF	SAPHGVVF	0.0095	-99.9	1.7536	0.0944	1	1.7536
1184	RLNEVAKNL	Sequence	RLNEVAKNL	RLNEVAKNL	0.247	-99.9	1.8665	297	ETKCTLKSF	ETKCTLKSF	ETKCTLKSF	0.0092	-99.9	1.7887	0.0215	1	1.7887
76	KRFDNPVL	Sequence	KRFDN-PVL	KRFDNPVL	0.2468	-99.9	1.8686	1219	FIAGLIAIV	FIAGLIAIV	FIAGLIAIV	0.009	-99.9	1.827	0.0079	1	1.827
407	RQIAPGQTGKI	Sequence	RQIAPGQTI	RQIAPGQTGKI	0.2451	-99.9	1.8825	1220	IAGLIAIVM	IAGLIAIVM	IAGLIAIVM	0.009	-99.9	1.8271	0.0455	1	1.8271
415	GKIADYNY	Sequence	GKIADYN-Y	GKIADYNY	0.2437	-99.9	1.8953	356	RISNCVADY	RISNCVADY	RISNCVADY	0.009	-99.9	1.8275	0.0482	1	1.8275
192	VFKNIDGYF	Sequence	VFKNIDGYF	VFKNIDGYF	0.24	-99.9	1.9251	878	AGTITSGWTF	ATITSGWTF	AGTITSGWTF	0.0089	-99.9	1.8434	0.0659	1	1.8434
685	SVASQSIIAY	Sequence	SASQSIIAY	SVASQSIIAY	0.2392	-99.9	1.932	1135	TVYDPLQPEL	TVYDPLQEL	TVYDPLQPEL	0.0089	-99.9	1.8521	0.016	1	1.8521
269	LQPRTFLLKY	Sequence	LQRTFLLKY	LQPRTFLLKY	0.2323	-99.9	1.9879	1128	VIGIVNNTVY	VIIVNNTVY	VIGIVNNTVY	0.0088	-99.9	1.8616	0.0454	1	1.8616
1069	AQEKNFTTA	Sequence	AQEKNFTTA	AQEKNFTTA	0.2314	-99.9	1.9958	27	YTNSFTRGV	YTNSFTRGV	YTNSFTRGV	0.0088	-99.9	1.8669	0.012	1	1.8669
889	AGAALQIPF	Sequence	AGAALQIPF	AGAALQIPF	0.2305	-99.9	2.004	704	VAYSNNSIA	VAYSNNSIA	VAYSNNSIA	0.0087	-99.9	1.881	0.035	1	1.881
391	FTNVYADSF	Sequence	FTNVYADSF	FTNVYADSF	0.2292	-99.9	2.0171	602	NTSNQVAVLY	NTSNVAVLY	NTSNQVAVLY	0.0086	-99.9	1.8902	0.014	1	1.8902
161	SANNCTFEY	Sequence	SANNCTFEY	SANNCTFEY	0.2288	-99.9	2.0218	486	NCYFPLQSY	NCYFPLQSY	NCYFPLQSY	0.0086	-99.9	1.8928	0.1378	2	1.6937
342	NATRFASVY	Sequence	NATRFASVY	NATRFASVY	0.2238	-99.9	2.0757	255	SGWTAGAAAY	SGWAGAAAY	SGWTAGAAAY	0.0086	-99.9	1.8963	0.1059	1	1.8963
772	EQDKNTQEVF	Sequence	EQKNTQEVF	EQDKNTQEVF	0.2233	-99.9	2.0812	1100	HWFVTQRNF	HWFVTQRNF	HWFVTQRNF	0.0086	-99.9	1.9015	0.0631	1	1.9015
189	REFVFKNIDGY	Sequence	REFKNIDGY	REFVFKNIDGY	0.2208	-99.9	2.1079	998	GRLQSLQTY	GRLQSLQTY	GRLQSLQTY	0.0085	-99.9	1.9147	0.4285	2	0.1014
794	KDFGGFNF	Sequence	KDF-GGFNF	KDFGGFNF	0.2201	-99.9	2.1149	1059	VVFLHVTYV	VVFLHVTYV	VVFLHVTYV	0.0083	-99.9	1.9545	0.0193	1	1.9545
18	TTRTQLPPAY	Sequence	TRTQLPPAY	TTRTQLPPAY	0.2195	-99.9	2.1218	393	NVYADSFVI	NVYADSFVI	NVYADSFVI	0.0083	-99.9	1.9573	0.032	1	1.9573
812	SKRSFIEDL	Sequence	SKRSFIEDL	SKRSFIEDL	0.216	-99.9	2.1584	863	LLTDEMIAQY	LLTDEIAQY	LLTDEMIAQY	0.0082	-99.9	1.9608	0.0456	1	1.9608
824	KVTLADAGF	Sequence	KVTLADAGF	KVTLADAGF	0.2158	-99.9	2.161	494	YGFQPTNGV	YGFQPTNGV	YGFQPTNGV	0.0081	-99.9	1.9901	0.0376	1	1.9901
864	LTDEMIAQY	Sequence	LTDEMIAQY	LTDEMIAQY	0.2146	-99.9	2.1739	366	VLYNSASF	VLY-NSASF	VLYNSASF	0.0079	-99.9	2.0374	0.2025	1	1.0423
325	IVRFPNITNL	Sequence	IRFPNITNL	IVRFPNITNL	0.2114	-99.9	2.2082	101	RGWIFGTTL	RGWIFGTTL	RGWIFGTTL	0.0078	-99.9	2.0505	0.146	1	1.5845
687	ASQSIIAY	Sequence	ASQ-SIIAY	ASQSIIAY	0.2108	-99.9	2.2143	1079	AICHDGKAHF	AIHDGKAHF	AICHDGKAHF	0.0078	-99.9	2.0623	0.0702	0	2.0623
753	LQYGSFCTQL	Sequence	LQYGSFTQL	LQYGSFCTQL	0.2101	-99.9	2.2216	284	ITDAVDCAL	ITDAVDCAL	ITDAVDCAL	0.0078	-99.9	2.0675	0.0105	0	2.0675
711	IAIPTNFTI	Sequence	IAIPTNFTI	IAIPTNFTI	0.2093	-99.9	2.23	827	LADAGFIKQY	LAAGFIKQY	LADAGFIKQY	0.0077	-99.9	2.085	0.0451	0	2.085
442	SKVGGNYNYLY	Sequence	SKVGGNYNY	SKVGGNYNYLY	0.2078	-99.9	2.247	884	GWTFGAGAAL	GTFGAGAAL	GWTFGAGAAL	0.0076	-99.9	2.1047	0.0258	0	2.1047
1080	ICHDGKAHF	Sequence	ICHDGKAHF	ICHDGKAHF	0.2065	-99.9	2.2607	663	IPIGAGICASY	IPIGAGASY	IPIGAGICASY	0.0075	-99.9	2.131	0.0399	0	2.131
690	SIIAYTMSL	Sequence	SIIAYTMSL	SIIAYTMSL	0.2049	-99.9	2.2771	918	NQKLIANQF	NQKLIANQF	NQKLIANQF	0.0075	-99.9	2.1357	0.4335	1	0.0873
20	RTQLPPAY	Sequence	RTQ-LPPAY	RTQLPPAY	0.2043	-99.9	2.2842	717	FTISVTTEIL	FTISVTTEL	FTISVTTEIL	0.0075	-99.9	2.1357	0.0061	0	2.1357
1017	IRASANLAA	Sequence	IRASANLAA	IRASANLAA	0.2039	-99.9	2.288	914	VLYENQKLI	VLYENQKLI	VLYENQKLI	0.0075	-99.9	2.1414	0.045	0	2.1414
650	IGAEHVNNSY	Sequence	IGAEHNNSY	IGAEHVNNSY	0.2033	-99.9	2.2945	995	LITGRLQSL	LITGRLQSL	LITGRLQSL	0.0074	-99.9	2.1606	0.0126	0	2.1606
255	SGWTAGAAAY	Sequence	SGWTAGAAY	SGWTAGAAAY	0.2033	-99.9	2.2951	635	YSTGSNVF	YST-GSNVF	YSTGSNVF	0.0073	-99.9	2.17	0.0489	0	2.17
950	VVNQNAQAL	Sequence	VVNQNAQAL	VVNQNAQAL	0.2017	-99.9	2.3122	235	TRFQTLLAL	TRFQTLLAL	TRFQTLLAL	0.0073	-99.9	2.1813	0.3077	1	0.478
132	FQFCNDPFL	Sequence	FQFCNDPFL	FQFCNDPFL	0.2007	-99.9	2.3226	553	ESNKKFLPF	ESNKKFLPF	ESNKKFLPF	0.0073	-99.9	2.1837	0.0507	0	2.1837
232	INITRFQTL	Sequence	INITRFQTL	INITRFQTL	0.2003	-99.9	2.3267	124	NVVIKVCEF	NVVIKVCEF	NVVIKVCEF	0.0073	-99.9	2.1857	0.0208	0	2.1857
148	NKSWMESEF	Sequence	NKSWMESEF	NKSWMESEF	0.1998	-99.9	2.3326	589	CSFGGVSVI	CSFGGVSVI	CSFGGVSVI	0.0072	-99.9	2.2012	0.0218	0	2.2012
265	YVGYLQPRTF	Sequence	YVYLQPRTF	YVGYLQPRTF	0.1962	-99.9	2.371	305	FTVEKGIYQ	FTVEKGIYQ	FTVEKGIYQ	0.0071	-99.9	2.2241	0.0054	0	2.2241
967	SNFGAISSV	Sequence	SNFGAISSV	SNFGAISSV	0.1956	-99.9	2.3767	132	FQFCNDPFL	FQFCNDPFL	FQFCNDPFL	0.0071	-99.9	2.2315	0.1039	0	2.2315
555	NKKFLPFQQF	Sequence	NKFLPFQQF	NKKFLPFQQF	0.1931	-99.9	2.4036	359	NCVADYSVLY	NVADYSVLY	NCVADYSVLY	0.0069	-99.9	2.2892	0.0203	0	2.2892
1059	VVFLHVTY	Sequence	VVF-LHVTY	VVFLHVTY	0.1922	-99.9	2.4139	1094	FVSNGTHW	FVS-NGTHW	FVSNGTHW	0.0068	-99.9	2.2958	0.0093	0	2.2958
975	VLNDILSRL	Sequence	VLNDILSRL	VLNDILSRL	0.1895	-99.9	2.4424	29	NSFTRGVY	NSF-TRGVY	NSFTRGVY	0.0067	-99.9	2.3286	0.0497	0	2.3286
28	TNSFTRGVY	Sequence	TNSFTRGVY	TNSFTRGVY	0.1829	-99.9	2.5175	708	NNSIAIPTNF	NSIAIPTNF	NNSIAIPTNF	0.0066	-99.9	2.3608	0.033	0	2.3608
1072	KNFTTAPAI	Sequence	KNFTTAPAI	KNFTTAPAI	0.1817	-99.9	2.5329	928	SAIGKIQDSL	SAIGKIQSL	SAIGKIQDSL	0.0064	-99.9	2.398	0.0142	0	2.398
193	FKNIDGYF	Sequence	FKNIDG-YF	FKNIDGYF	0.1815	-99.9	2.5362	1059	VVFLHVTY	VVF-LHVTY	VVFLHVTY	0.0064	-99.9	2.4081	0.0993	0	2.4081
763	NRALTGIAV	Sequence	NRALTGIAV	NRALTGIAV	0.1809	-99.9	2.5437	157	RVYSSANNCTF	RVYSSANTF	RVYSSANNCTF	0.0064	-99.9	2.4094	0.0837	0	2.4094
933	IQDSLSSTA	Sequence	IQDSLSSTA	IQDSLSSTA	0.1806	-99.9	2.5482	361	VADYSVLY	VADYS-VLY	VADYSVLY	0.0064	-99.9	2.4103	0.0383	0	2.4103
1054	SAPHGVVF	Sequence	SA-PHGVVF	SAPHGVVF	0.1793	-99.9	2.5668	887	FGAGAALQI	FGAGAALQI	FGAGAALQI	0.0062	-99.9	2.4466	0.0186	0	2.4466
1106	RNFYEPQII	Sequence	RNFYEPQII	RNFYEPQII	0.178	-99.9	2.585	575	VRDPQTLEI	VRDPQTLEI	VRDPQTLEI	0.0062	-99.9	2.4498	0.1627	1	1.3606
204	SKHTPINLV	Sequence	SKHTPINLV	SKHTPINLV	0.1763	-99.9	2.6079	183	GNFKNLREF	GNFKNLREF	GNFKNLREF	0.0062	-99.9	2.4507	0.3281	1	0.399
440	LDSKVGGNY	Sequence	LDSKVGGNY	LDSKVGGNY	0.1761	-99.9	2.6107	1174	SVVNIQKEI	SVVNIQKEI	SVVNIQKEI	0.0062	-99.9	2.4539	0.0178	0	2.4539
194	KNIDGYFKI	Sequence	KNIDGYFKI	KNIDGYFKI	0.1757	-99.9	2.6163	201	KIYSKHTPI	KIYSKHTPI	KIYSKHTPI	0.0062	-99.9	2.4554	0.0231	0	2.4554
494	YGFQPTNGVGY	Sequence	YQPTNGVGY	YGFQPTNGVGY	0.1753	-99.9	2.6222	851	AQKFNGLTV	AQKFNGLTV	AQKFNGLTV	0.0062	-99.9	2.4621	0.3091	1	0.4703
296	SETKCTLKSF	Sequence	SETKTLKSF	SETKCTLKSF	0.1751	-99.9	2.6249	463	FERDISTEIY	FERDISTEY	FERDISTEIY	0.0061	-99.9	2.4695	0.3206	1	0.4271
633	RVYSTGSNV	Sequence	RVYSTGSNV	RVYSTGSNV	0.1733	-99.9	2.649	1146	SFKEELDKY	SFKEELDKY	SFKEELDKY	0.006	-99.9	2.4978	0.076	0	2.4978
343	ATRFASVYAW	Sequence	ARFASVYAW	ATRFASVYAW	0.1725	-99.9	2.6606	1019	ASANLAATKM	ASANLAATM	ASANLAATKM	0.006	-99.9	2.4985	0.0185	0	2.4985
773	QDKNTQEVF	Sequence	QDKNTQEVF	QDKNTQEVF	0.1721	-99.9	2.6663	974	SVLNDILSRL	SVNDILSRL	SVLNDILSRL	0.006	-99.9	2.5214	0.0103	0	2.5214
1034	GQSKRVDF	Sequence	GQSK-RVDF	GQSKRVDF	0.1716	-99.9	2.6722	889	AGAALQIPF	AGAALQIPF	AGAALQIPF	0.0059	-99.9	2.523	0.1182	0	2.004
360	CVADYSVLY	Sequence	CVADYSVLY	CVADYSVLY	0.1699	-99.9	2.696	684	RSVASQSIIAY	RSVASQSAY	RSVASQSIIAY	0.0059	-99.9	2.5425	0.0497	0	2.5425
936	SLSSTASAL	Sequence	SLSSTASAL	SLSSTASAL	0.1676	-99.9	2.7277	494	YGFQPTNGVGY	YGFQNGVGY	YGFQPTNGVGY	0.0059	-99.9	2.5561	0.0906	0	2.5561
132	FQFCNDPF	Sequence	FQFCNDP-F	FQFCNDPF	0.1675	-99.9	2.7294	781	FAQVKQIY	FAQ-VKQIY	FAQVKQIY	0.0058	-99.9	2.5721	0.038	0	2.5721
624	HADQLTPTW	Sequence	HADQLTPTW	HADQLTPTW	0.167	-99.9	2.7365	832	FIKQYGDCL	FIKQYGDCL	FIKQYGDCL	0.0058	-99.9	2.5908	0.0076	0	2.5908
504	YQPYRVVVLSF	Sequence	YQRVVVLSF	YQPYRVVVLSF	0.1642	-99.9	2.7744	333	NLCPFGEVF	NLCPFGEVF	NLCPFGEVF	0.0057	-99.9	2.6002	0.2071	1	0.9995
1140	LQPELDSF	Sequence	LQ-PELDSF	LQPELDSF	0.1633	-99.9	2.7872	255	SGWTAGAAAYY	STAGAAAYY	SGWTAGAAAYY	0.0057	-99.9	2.6189	0.0186	0	2.6189
868	MIAQYTSAL	Sequence	MIAQYTSAL	MIAQYTSAL	0.1633	-99.9	2.7876	28	TNSFTRGVY	TNSFTRGVY	TNSFTRGVY	0.0056	-99.9	2.6664	0.0942	0	2.5175
723	TEILPVSM	Sequence	TEI-LPVSM	TEILPVSM	0.163	-99.9	2.7907	341	FNATRFASVY	FATRFASVY	FNATRFASVY	0.0055	-99.9	2.6875	0.0375	0	2.6875
157	RVYSSANNCTF	Sequence	RVYSSANTF	RVYSSANNCTF	0.1609	-99.9	2.8197	1038	RVDFCGKGY	RVDFCGKGY	RVDFCGKGY	0.0055	-99.9	2.7003	0.0583	0	2.7003
845	ARDLICAQKF	Sequence	ARDLIAQKF	ARDLICAQKF	0.1608	-99.9	2.8216	721	VTTEILPVSM	VTTEIPVSM	VTTEILPVSM	0.0055	-99.9	2.7062	0.006	0	2.7062
1188	VAKNLNESL	Sequence	VAKNLNESL	VAKNLNESL	0.1606	-99.9	2.8239	412	GQTGKIADY	GQTGKIADY	GQTGKIADY	0.0054	-99.9	2.742	0.4045	1	0.1494
237	FQTLLALHRSY	Sequence	FQLALHRSY	FQTLLALHRSY	0.1606	-99.9	2.824	877	LAGTITSGW	LAGTITSGW	LAGTITSGW	0.0054	-99.9	2.7443	0.0117	0	2.7443
891	AALQIPFAMQM	Sequence	AQIPFAMQM	AALQIPFAMQM	0.155	-99.9	2.9007	320	QPTESIVRF	QPTESIVRF	QPTESIVRF	0.0054	-99.9	2.7502	0.0583	0	2.7502
23	LPPAYTNSF	Sequence	LPPAYTNSF	LPPAYTNSF	0.1548	-99.9	2.904	22	QLPPAYTNSF	QLPPATNSF	QLPPAYTNSF	0.0053	-99.9	2.772	0.0618	0	2.772
731	TKTSVDCTM	Sequence	TKTSVDCTM	TKTSVDCTM	0.1524	-99.9	2.9371	159	YSSANNCTFEY	YSSANTFEY	YSSANNCTFEY	0.0053	-99.9	2.7744	0.0066	0	2.7744
203	YSKHTPINL	Sequence	YSKHTPINL	YSKHTPINL	0.1516	-99.9	2.9488	699	GAENSVAY	GA-ENSVAY	GAENSVAY	0.0053	-99.9	2.7802	0.0588	0	2.7802
416	KIADYNYKL	Sequence	KIADYNYKL	KIADYNYKL	0.1514	-99.9	2.9516	1120	FVSGNCDVV	FVSGNCDVV	FVSGNCDVV	0.0053	-99.9	2.7853	0.0035	0	2.7853
50	TQDLFLPF	Sequence	TQ-DLFLPF	TQDLFLPF	0.1501	-99.9	2.9683	256	GWTAGAAAY	GWTAGAAAY	GWTAGAAAY	0.0052	-99.9	2.804	0.0497	0	2.804
1197	IDLQELGKY	Sequence	IDLQELGKY	IDLQELGKY	0.1472	-99.9	3.0108	710	SIAIPTNF	SIA-IPTNF	SIAIPTNF	0.0051	-99.9	2.8706	0.0391	0	2.8706
1146	SFKEELDKY	Sequence	SFKEELDKY	SFKEELDKY	0.1459	-99.9	3.0343	228	LPIGINITRF	LPIGINITF	LPIGINITRF	0.005	-99.9	2.885	0.0294	0	2.885
442	SKVGGNYNYL	Sequence	SKVGGNYNY	SKVGGNYNY	0.1442	-99.9	3.0651	705	AYSNNSIAI	AYSNNSIAI	AYSNNSIAI	0.005	-99.9	2.8936	0.0154	0	2.8936
441	DSKVGGNYNY	Sequence	SKVGGNYNY	SKVGGNYNY	0.1421	-99.9	3.1027	890	GAALQIPFAM	GAAQIPFAM	GAALQIPFAM	0.005	-99.9	2.9049	0.0118	0	2.9049
687	ASQSIIAYTM	Sequence	AQSIIAYTM	ASQSIIAYTM	0.1378	-99.9	3.1804	195	NIDGYFKIY	NIDGYFKIY	NIDGYFKIY	0.005	-99.9	2.9053	0.0642	0	2.9053
268	YLQPRTFLL	Sequence	YLQPRTFLL	YLQPRTFLL	0.1373	-99.9	3.1908	117	LIVNNATNV	LIVNNATNV	LIVNNATNV	0.0049	-99.9	2.9322	0.0059	0	2.9322
1044	KGYHLMSF	Sequence	KGY-HLMSF	KGYHLMSF	0.1366	-99.9	3.2023	687	ASQSIIAY	ASQ-SIIAY	ASQSIIAY	0.0048	-99.9	2.9817	0.1078	0	2.2143
534	KNKCVNFNF	Sequence	KNKCVNFNF	KNKCVNFNF	0.1366	-99.9	3.2026	303	KSFTVEKGIY	KSFTVKGIY	KSFTVEKGIY	0.0048	-99.9	2.9829	0.0405	0	2.9829
988	AEVQIDRLI	Sequence	AEVQIDRLI	AEVQIDRLI	0.1356	-99.9	3.22	443	KVGGNYNYLY	KVGGNNYLY	KVGGNYNYLY	0.0047	-99.9	2.9996	0.0248	0	2.9996
787	IYKTPPIKDF	Sequence	IKTPPIKDF	IYKTPPIKDF	0.1353	-99.9	3.2251	190	EFVFKNIDGY	FVFKNIDGY	FVFKNIDGY	0.0047	-99.9	3.0295	0.0137	0	3.0295
1047	HLMSFPQSA	Sequence	HLMSFPQSA	HLMSFPQSA	0.1331	-99.9	3.2652	1101	WFVTQRNFY	WFVTQRNFY	WFVTQRNFY	0.0046	-99.9	3.0591	0.027	0	3.0591
1079	AICHDGKAHF	Sequence	AIHDGKAHF	AICHDGKAHF	0.1327	-99.9	3.2726	267	GYLQPRTFL	GYLQPRTFL	GYLQPRTFL	0.0046	-99.9	3.0939	0.0212	0	3.0939
452	YRLFRKSNL	Sequence	YRLFRKSNL	YRLFRKSNL	0.1325	-99.9	3.2766	730	MTKTSVDCTM	MTKTSVDTM	MTKTSVDCTM	0.0045	-99.9	3.1199	0.0103	0	3.1199
750	NLLLQYGSF	Sequence	NLLLQYGSF	NLLLQYGSF	0.1323	-99.9	3.2798	343	ATRFASVYAW	ATRFASVAW	ATRFASVYAW	0.0045	-99.9	3.1466	0.0885	0	2.6606
444	VGGNYNYLY	Sequence	VGGNYNYLY	VGGNYNYLY	0.1316	-99.9	3.292	45	SVLHSTQDL	SVLHSTQDL	SVLHSTQDL	0.0044	-99.9	3.1651	0.0144	0	3.1651
180	GKQGNFKNL	Sequence	GKQGNFKNL	GKQGNFKNL	0.1313	-99.9	3.2986	370	SASFSTFKCY	SASFSTFKY	SASFSTFKCY	0.0044	-99.9	3.1703	0.0179	0	3.1703
533	VKNKCVNFNF	Sequence	VKNKVNFNF	VKNKCVNFNF	0.1298	-99.9	3.3253	1047	HLMSFPQSA	HLMSFPQSA	HLMSFPQSA	0.0044	-99.9	3.1842	0.0688	0	3.1842
414	TGKIADYNY	Sequence	TGKIADYNY	TGKIADYNY	0.1297	-99.9	3.3259	488	YFPLQSYGF	YFPLQSYGF	YFPLQSYGF	0.0044	-99.9	3.1906	0.0222	0	3.1906
919	QKLIANQF	Sequence	QKL-IANQF	QKLIANQF	0.1292	-99.9	3.3355	779	EVFAQVKQIY	EVFQVKQIY	EVFAQVKQIY	0.0043	-99.9	3.2265	0.019	0	3.2265
916	YENQKLIANQF	Sequence	YQKLIANQF	YENQKLIANQF	0.1258	-99.9	3.3964	704	VAYSNNSIAI	VAYNNSIAI	VAYSNNSIAI	0.0043	-99.9	3.2468	0.0128	0	3.2468
70	SGTNGTKRF	Sequence	SGTNGTKRF	SGTNGTKRF	0.1245	-99.9	3.4195	1053	QSAPHGVVFL	QSAPHGVVL	QSAPHGVVFL	0.0043	-99.9	3.2474	0.0267	0	3.2474
385	KLNDLCFTNVY	Sequence	KLNDFTNVY	KLNDLCFTNVY	0.1245	-99.9	3.4201	20	RTQLPPAY	RTQ-LPPAY	RTQLPPAY	0.0043	-99.9	3.263	0.1043	0	2.2842
499	TNGVGYQPY	Sequence	TNGVGYQPY	TNGVGYQPY	0.1241	-99.9	3.4268	480	NGVEGFNCY	NGVEGFNCY	NGVEGFNCY	0.0043	-99.9	3.263	0.0556	0	3.263
1009	QQLIRAAEI	Sequence	QQLIRAAEI	QQLIRAAEI	0.1239	-99.9	3.4304	1130	GIVNNTVY	GIV-NNTVY	GIVNNTVY	0.0042	-99.9	3.2752	0.0371	0	3.2752
485	FNCYFPLQSY	Sequence	FNYFPLQSY	FNCYFPLQSY	0.1238	-99.9	3.4327	1025	ATKMSECVL	ATKMSECVL	ATKMSECVL	0.0042	-99.9	3.2781	0.007	0	3.2781
32	TRGVYYPDKVF	Sequence	TRYYPDKVF	TRGVYYPDKVF	0.1237	-99.9	3.4341	1003	LQTYVTQQL	LQTYVTQQL	LQTYVTQQL	0.0042	-99.9	3.2827	0.2465	1	0.7753
195	NIDGYFKIY	Sequence	NIDGYFKIY	NIDGYFKIY	0.1234	-99.9	3.4395	960	TLVKQLSSNF	TVKQLSSNF	TLVKQLSSNF	0.0042	-99.9	3.2955	0.0273	0	3.2955
878	AGTITSGWTF	Sequence	ATITSGWTF	AGTITSGWTF	0.1228	-99.9	3.4509	781	FAQVKQIYK	FAQVKQIYK	FAQVKQIYK	0.0042	-99.9	3.2972	0.003	0	3.2972
922	IANQFNSAI	Sequence	IANQFNSAI	IANQFNSAI	0.1219	-99.9	3.4675	1093	VFVSNGTHWF	VFVSNGTHF	VFVSNGTHWF	0.0042	-99.9	3.3169	0.0274	0	3.3169
1224	IAIVMVTIM	Sequence	IAIVMVTIM	IAIVMVTIM	0.1213	-99.9	3.4786	19	TRTQLPPAY	TRTQLPPAY	TRTQLPPAY	0.0042	-99.9	3.3216	0.3627	1	0.2637
1093	VFVSNGTHW	Sequence	VFVSNGTHW	VFVSNGTHW	0.1196	-99.9	3.5104	957	ALNTLVKQL	ALNTLVKQL	ALNTLVKQL	0.0041	-99.9	3.3772	0.0453	0	3.3772
22	QLPPAYTNSF	Sequence	QLPPATNSF	QLPPAYTNSF	0.1182	-99.9	3.5409	997	TGRLQSLQTY	TGRQSLQTY	TGRLQSLQTY	0.004	-99.9	3.3951	0.1954	1	1.082
154	SEFRVYSSA	Sequence	SEFRVYSSA	SEFRVYSSA	0.118	-99.9	3.5452	582	EILDITPCSF	EILDITPSF	EILDITPCSF	0.004	-99.9	3.4177	0.015	0	3.4177
1100	HWFVTQRNF	Sequence	HWFVTQRNF	HWFVTQRNF	0.1176	-99.9	3.5555	851	AQKFNGLTVL	AQFNGLTVL	AQKFNGLTVL	0.004	-99.9	3.4195	0.2891	1	0.5503
307	VEKGIYQTSNF	Sequence	VEKGITSNF	VEKGIYQTSNF	0.117	-99.9	3.5672	1086	AHFPREGVF	AHFPREGVF	AHFPREGVF	0.004	-99.9	3.4264	0.398	1	0.1596
903	YRFNGIGVT	Sequence	YRFNGIGVT	YRFNGIGVT	0.1156	-99.9	3.598	240	LLALHRSYL	LLALHRSYL	LLALHRSYL	0.004	-99.9	3.4345	0.0182	0	3.4345
337	FGEVFNATRF	Sequence	FEVFNATRF	FGEVFNATRF	0.1155	-99.9	3.6012	481	GVEGFNCYF	GVEGFNCYF	GVEGFNCYF	0.004	-99.9	3.4455	0.0323	0	3.4455
1111	PQIITTDNTF	Sequence	PQIITTNTF	PQIITTDNTF	0.1152	-99.9	3.609	826	TLADAGFIKQY	TLADAGFQY	TLADAGFIKQY	0.0039	-99.9	3.4762	0.035	0	3.4762
412	GQTGKIADYNY	Sequence	GQTGKIANY	GQTGKIADYNY	0.1149	-99.9	3.6138	574	AVRDPQTLEI	AVRDPTLEI	AVRDPQTLEI	0.0039	-99.9	3.4919	0.0199	0	3.4919
312	YQTSNFRVQ	Sequence	YQTSNFRVQ	YQTSNFRVQ	0.1147	-99.9	3.6191	692	IAYTMSLGA	IAYTMSLGA	IAYTMSLGA	0.0039	-99.9	3.4988	0.0109	0	3.4988
401	IRGDEVRQI	Sequence	IRGDEVRQI	IRGDEVRQI	0.1142	-99.9	3.6301	210	NLVRDLPQGF	NVRDLPQGF	NLVRDLPQGF	0.0039	-99.9	3.5	0.037	0	3.5
240	LLALHRSY	Sequence	LLA-LHRSY	LLALHRSY	0.1141	-99.9	3.6327	687	ASQSIIAYTM	ASQSIIATM	ASQSIIAYTM	0.0039	-99.9	3.5076	0.0708	0	3.1804
953	QNAQALNTL	Sequence	QNAQALNTL	QNAQALNTL	0.114	-99.9	3.635	696	MSLGAENSV	MSLGAENSV	MSLGAENSV	0.0038	-99.9	3.513	0.0131	0	3.513
952	NQNAQALNTL	Sequence	NQAQALNTL	NQNAQALNTL	0.1123	-99.9	3.6717	45	SVLHSTQDLF	SVHSTQDLF	SVLHSTQDLF	0.0038	-99.9	3.5153	0.0235	0	3.5153
699	GAENSVAY	Sequence	GA-ENSVAY	GAENSVAY	0.1122	-99.9	3.6738	455	FRKSNLKPF	FRKSNLKPF	FRKSNLKPF	0.0038	-99.9	3.5176	0.2637	1	0.6833
1205	YEQYIKWPWY	Sequence	YQYIKWPWY	YEQYIKWPWY	0.1115	-99.9	3.6905	158	VYSSANNCTF	VSSANNCTF	VYSSANNCTF	0.0038	-99.9	3.5206	0.0233	0	3.5206
1038	RVDFCGKGY	Sequence	RVDFCGKGY	RVDFCGKGY	0.1112	-99.9	3.6963	1019	ASANLAATK	ASANLAATK	ASANLAATK	0.0038	-99.9	3.529	0.0038	0	3.529
813	KRSFIEDLL	Sequence	KRSFIEDLL	KRSFIEDLL	0.1112	-99.9	3.6972	495	GFQPTNGVGY	FQPTNGVGY	FQPTNGVGY	0.0038	-99.9	3.5305	0.1424	1	1.6047
320	QPTESIVRF	Sequence	QPTESIVRF	QPTESIVRF	0.1112	-99.9	3.6975	1219	FIAGLIAIVM	FIAGIAIVM	FIAGLIAIVM	0.0038	-99.9	3.5344	0.0078	0	3.5344
28	TNSFTRGVYY	Sequence	TSFTRGVYY	TNSFTRGVYY	0.1092	-99.9	3.7401	268	YLQPRTFLLKY	YLQPRTLKY	YLQPRTFLLKY	0.0038	-99.9	3.5672	0.0166	0	3.5672
150	SWMESEFRVY	Sequence	SMESEFRVY	SWMESEFRVY	0.1087	-99.9	3.7525	134	FCNDPFLGVY	FCNDPFLVY	FCNDPFLGVY	0.0038	-99.9	3.5695	0.0259	0	3.5695
456	RKSNLKPF	Sequence	RKS-NLKPF	RKSNLKPF	0.1074	-99.9	3.7811	1191	NLNESLIDL	NLNESLIDL	NLNESLIDL	0.0037	-99.9	3.5886	0.0109	0	3.5886
480	NGVEGFNCY	Sequence	NGVEGFNCY	NGVEGFNCY	0.1069	-99.9	3.792	684	RSVASQSII	RSVASQSII	RSVASQSII	0.0037	-99.9	3.5985	0.0227	0	3.5985
812	SKRSFIEDLLF	Sequence	SKRSEDLLF	SKRSFIEDLLF	0.1068	-99.9	3.7936	567	DIADTTDAV	DIADTTDAV	DIADTTDAV	0.0037	-99.9	3.6076	0.003	0	3.6076
731	TKTSVDCTMY	Sequence	TKTSVDTMY	TKTSVDCTMY	0.1061	-99.9	3.8089	317	FRVQPTESI	FRVQPTESI	FRVQPTESI	0.0037	-99.9	3.6282	0.1838	1	1.1609
996	ITGRLQSLQTY	Sequence	IRLQSLQTY	ITGRLQSLQTY	0.1057	-99.9	3.8177	318	RVQPTESIV	RVQPTESIV	RVQPTESIV	0.0037	-99.9	3.6282	0.0186	0	3.6282
465	RDISTEIY	Sequence	RDIS-TEIY	RDISTEIY	0.1045	-99.9	3.8437	91	FASTEKSNI	FASTEKSNI	FASTEKSNI	0.0037	-99.9	3.6557	0.0047	0	3.6557
554	SNKKFLPFQQF	Sequence	SKFLPFQQF	SNKKFLPFQQF	0.1045	-99.9	3.8455	892	ALQIPFAMQM	AQIPFAMQM	ALQIPFAMQM	0.0036	-99.9	3.6786	0.2667	1	0.6652
212	VRDLPQGF	Sequence	VRD-LPQGF	VRDLPQGF	0.1034	-99.9	3.8678	270	QPRTFLLKY	QPRTFLLKY	QPRTFLLKY	0.0036	-99.9	3.6824	0.0505	0	3.6824
990	VQIDRLIT	Sequence	VQIDRLIT-	VQIDRLIT	0.1031	-99.9	3.8747	1004	QTYVTQQLI	QTYVTQQLI	QTYVTQQLI	0.0036	-99.9	3.726	0.0089	0	3.726
1013	RAAEIRASA	Sequence	RAAEIRASA	RAAEIRASA	0.1025	-99.9	3.8885	508	RVVVLSFEL	RVVVLSFEL	RVVVLSFEL	0.0035	-99.9	3.7809	0.0244	0	3.7809
962	VKQLSSNF	Sequence	VKQ-LSSNF	VKQLSSNF	0.1023	-99.9	3.8939	574	AVRDPQTL	AVRDP-QTL	AVRDPQTL	0.0035	-99.9	3.7954	0.0192	0	3.7954
75	TKRFDNPVLPF	Sequence	TKRNPVLPF	TKRFDNPVLPF	0.1013	-99.9	3.9162	556	KKFLPFQQF	KKFLPFQQF	KKFLPFQQF	0.0035	-99.9	3.8053	0.4801	1	0.0149
366	VLYNSASFSTF	Sequence	VLYNSASTF	VLYNSASFSTF	0.1007	-99.9	3.9287	35	VYYPDKVF	VYYP-DKVF	VYYPDKVF	0.0034	-99.9	3.8366	0.0424	0	3.8366
556	KKFLPFQQFG	Sequence	KKFLPFQQF	KKFLPFQQF	0.0997	-99.9	3.9514	214	DLPQGFSAL	DLPQGFSAL	DLPQGFSAL	0.0034	-99.9	3.8832	0.0086	0	3.8832
557	KFLPFQQF	Sequence	K-FLPFQQF	KFLPFQQF	0.0995	-99.9	3.9541	776	NTQEVFAQV	NTQEVFAQV	NTQEVFAQV	0.0033	-99.9	3.8939	0.0029	0	3.8939
746	TECSNLLLQY	Sequence	TESNLLLQY	TECSNLLLQY	0.0986	-99.9	3.9747	967	SNFGAISSV	SNFGAISSV	SNFGAISSV	0.0033	-99.9	3.9023	0.0995	0	2.3767
167	FEYVSQPFLM	Sequence	FEYSQPFLM	FEYVSQPFLM	0.098	-99.9	3.9889	1052	PQSAPHGVVF	QSAPHGVVF	QSAPHGVVF	0.0033	-99.9	3.926	0.1807	1	1.1803
1264	LKGVKLHY	Sequence	LK-GVKLHY	LKGVKLHY	0.0979	-99.9	3.9901	343	ATRFASVYA	ATRFASVYA	ATRFASVYA	0.0033	-99.9	3.926	0.0049	0	3.926
364	YSVLYNSASF	Sequence	YVLYNSASF	YSVLYNSASF	0.0976	-99.9	3.9967	785	KQIYKTPPI	KQIYKTPPI	KQIYKTPPI	0.0033	-99.9	3.9366	0.1828	1	1.1662
771	VEQDKNTQEVF	Sequence	VEQDKNTVF	VEQDKNTQEVF	0.0975	-99.9	4	1102	FVTQRNFY	FVT-QRNFY	FVTQRNFY	0.0032	-99.9	3.9763	0.0078	0	3.9763
270	QPRTFLLKY	Sequence	QPRTFLLKY	QPRTFLLKY	0.0973	-99.9	4.0048	733	TSVDCTMYI	TSVDCTMYI	TSVDCTMYI	0.0032	-99.9	4.0311	0.0038	0	4.0311
782	AQVKQIYKT	Sequence	AQVKQIYKT	AQVKQIYKT	0.096	-99.9	4.0456	442	SKVGGNYNY	SKVGGNYNY	SKVGGNYNY	0.0032	-99.9	4.0441	0.4572	1	0.0392
802	SQILPDPSK	Sequence	SQILPDPSK	SQILPDPSK	0.0957	-99.9	4.0543	409	IAPGQTGKI	IAPGQTGKI	IAPGQTGKI	0.0031	-99.9	4.0641	0.0043	0	4.0641
1209	IKWPWYIWL	Sequence	IKWPWYIWL	IKWPWYIWL	0.0946	-99.9	4.0879	894	QIPFAMQMAY	QIPAMQMAY	QIPFAMQMAY	0.0031	-99.9	4.1012	0.0241	0	4.1012
552	TESNKKFLPF	Sequence	TENKKFLPF	TESNKKFLPF	0.0945	-99.9	4.0919	1218	GFIAGLIAI	GFIAGLIAI	GFIAGLIAI	0.0031	-99.9	4.1062	0.017	0	4.1062
256	GWTAGAAAY	Sequence	GWTAGAAAY	GWTAGAAAY	0.0942	-99.9	4.0989	367	LYNSASFSTF	LYNSASSTF	LYNSASFSTF	0.0031	-99.9	4.1303	0.0407	0	4.1303
553	ESNKKFLPF	Sequence	ESNKKFLPF	ESNKKFLPF	0.0942	-99.9	4.1004	852	QKFNGLTVL	QKFNGLTVL	QKFNGLTVL	0.0031	-99.9	4.1563	0.3948	1	0.1643
797	GGFNFSQIL	Sequence	GGFNFSQIL	GGFNFSQIL	0.0938	-99.9	4.112	170	VSQPFLMDL	VSQPFLMDL	VSQPFLMDL	0.003	-99.9	4.1743	0.0109	0	4.1743
684	RSVASQSIIAY	Sequence	RASQSIIAY	RSVASQSIIAY	0.0935	-99.9	4.1219	1195	SLIDLQELGKY	SLIDELGKY	SLIDLQELGKY	0.003	-99.9	4.1754	0.016	0	4.1754
29	NSFTRGVY	Sequence	NSFTRG-VY	NSFTRGVY	0.0928	-99.9	4.1434	166	TFEYVSQPF	TFEYVSQPF	TFEYVSQPF	0.003	-99.9	4.1784	0.031	0	4.1784
83	LPFNDGVY	Sequence	LPFNDG-VY	LPFNDGVY	0.0927	-99.9	4.1451	573	DAVRDPQTL	DAVRDPQTL	DAVRDPQTL	0.003	-99.9	4.1904	0.0099	0	4.1904
732	KTSVDCTMY	Sequence	KTSVDCTMY	KTSVDCTMY	0.0914	-99.9	4.185	707	SNNSIAIPTNF	SSIAIPTNF	SNNSIAIPTNF	0.003	-99.9	4.2124	0.0116	0	4.2124
27	YTNSFTRGVY	Sequence	YTNSFTRVY	YTNSFTRGVY	0.0913	-99.9	4.1869	258	TAGAAAYY	TA-GAAAYY	TAGAAAYY	0.003	-99.9	4.2224	0.0214	0	4.2224
220	SALEPLVDL	Sequence	SALEPLVDL	SALEPLVDL	0.0912	-99.9	4.1924	439	NLDSKVGGNY	NLDSVGGNY	NLDSKVGGNY	0.003	-99.9	4.2335	0.0127	0	4.2335
635	YSTGSNVF	Sequence	YST-GSNVF	YSTGSNVF	0.0905	-99.9	4.2134	883	SGWTFGAGAAL	STFGAGAAL	SGWTFGAGAAL	0.003	-99.9	4.2525	0.0054	0	4.2525
955	AQALNTLVK	Sequence	AQALNTLVK	AQALNTLVK	0.0888	-99.9	4.2634	876	LLAGTITSGW	LLAGTITSW	LLAGTITSGW	0.0029	-99.9	4.2625	0.0168	0	4.2625
963	KQLSSNFGA	Sequence	KQLSSNFGA	KQLSSNFGA	0.0884	-99.9	4.2769	860	LPPLLTDEM	LPPLLTDEM	LPPLLTDEM	0.0029	-99.9	4.2846	0.009	0	4.2846
108	TLDSKTQSL	Sequence	TLDSKTQSL	TLDSKTQSL	0.088	-99.9	4.2872	70	SGTNGTKRF	SGTNGTKRF	SGTNGTKRF	0.0029	-99.9	4.3026	0.0637	0	3.4195
356	RISNCVADY	Sequence	RISNCVADY	RISNCVADY	0.0874	-99.9	4.3052	595	SVITPGTNT	SVITPGTNT	SVITPGTNT	0.0029	-99.9	4.3116	0.0042	0	4.3116
753	LQYGSFCTQ	Sequence	LQYGSFCTQ	LQYGSFCTQ	0.0871	-99.9	4.3161	999	RLQSLQTY	RLQ-SLQTY	RLQSLQTY	0.0029	-99.9	4.3176	0.2124	1	0.9597
407	RQIAPGQTGK	Sequence	RQIAPGQTK	RQIAPGQTGK	0.0869	-99.9	4.3225	441	DSKVGGNYNY	DSVGGNYNY	DSKVGGNYNY	0.0029	-99.9	4.3357	0.0725	0	3.1027
343	ATRFASVY	Sequence	ATR-FASVY	ATRFASVY	0.0869	-99.9	4.3233	476	STPCNGVEGF	STPCNGVEF	STPCNGVEGF	0.0029	-99.9	4.3477	0.0054	0	4.3477
1178	IQKEIDRL	Sequence	IQKEID-RL	IQKEIDRL	0.0867	-99.9	4.3294	319	VQPTESIVRF	VQPESIVRF	VQPTESIVRF	0.0029	-99.9	4.3487	0.2643	1	0.6769
642	FQTRAGCLI	Sequence	FQTRAGCLI	FQTRAGCLI	0.0866	-99.9	4.3298	88	GVYFASTEK	GVYFASTEK	GVYFASTEK	0.0028	-99.9	4.4158	0.0027	0	4.4158
957	ALNTLVKQL	Sequence	ALNTLVKQL	ALNTLVKQL	0.0865	-99.9	4.3336	169	YVSQPFLM	YVSQ-PFLM	YVSQPFLM	0.0028	-99.9	4.4249	0.0065	0	4.4249
617	TEVPVAIHA	Sequence	TEVPVAIHA	TEVPVAIHA	0.0865	-99.9	4.3354	1170	GINASVVNI	GINASVVNI	GINASVVNI	0.0028	-99.9	4.4319	0.0074	0	4.4319
144	YHKNNKSWM	Sequence	YHKNNKSWM	YHKNNKSWM	0.0854	-99.9	4.3674	929	AIGKIQDSL	AIGKIQDSL	AIGKIQDSL	0.0028	-99.9	4.4349	0.01	0	4.4349
963	KQLSSNFGAI	Sequence	KQLSSNGAI	KQLSSNFGAI	0.0847	-99.9	4.3884	76	KRFDNPVL	KRFDNP-VL	KRFDNPVL	0.0027	-99.9	4.476	0.1247	1	1.8686
100	IRGWIFGTTL	Sequence	IRWIFGTTL	IRGWIFGTTL	0.0846	-99.9	4.3929	1	FVFLVLLPL	FVFLVLLPL	FVFLVLLPL	0.0027	-99.9	4.485	0.0083	0	4.485
760	TQLNRALTG	Sequence	TQLNRALTG	TQLNRALTG	0.0839	-99.9	4.4128	1195	SLIDLQEL	SLID-LQEL	SLIDLQEL	0.0027	-99.9	4.5321	0.0159	0	4.5321
143	YYHKNNKSW	Sequence	YYHKNNKSW	YYHKNNKSW	0.0839	-99.9	4.4144	1018	RASANLAAT	RASANLAAT	RASANLAAT	0.0026	-99.9	4.5938	0.0059	0	4.5938
1127	VVIGIVNNTVY	Sequence	VVIGNNTVY	VVIGIVNNTVY	0.0838	-99.9	4.4152	921	LIANQFNSA	LIANQFNSA	LIANQFNSA	0.0026	-99.9	4.6222	0.0073	0	4.6222
575	VRDPQTLEIL	Sequence	VRDPQTLEL	VRDPQTLEIL	0.0838	-99.9	4.4152	257	WTAGAAAYYV	WTAGAAAYY	WTAGAAAYY	0.0026	-99.9	4.6654	0.0023	0	4.6654
863	LLTDEMIAQY	Sequence	LLTDEIAQY	LLTDEMIAQY	0.083	-99.9	4.4412	788	YKTPPIKDF	YKTPPIKDF	YKTPPIKDF	0.0026	-99.9	4.6667	0.4031	1	0.1495
118	IVNNATNVV	Sequence	IVNNATNVV	IVNNATNVV	0.0829	-99.9	4.4439	121	NATNVVIKV	NATNVVIKV	NATNVVIKV	0.0026	-99.9	4.6691	0.0034	0	4.6691
914	VLYENQKLI	Sequence	VLYENQKLI	VLYENQKLI	0.0825	-99.9	4.4555	68	HVSGTNGTK	HVSGTNGTK	HVSGTNGTK	0.0026	-99.9	4.6741	0.002	0	4.6741
532	LVKNKCVNF	Sequence	LVKNKCVNF	LVKNKCVNF	0.0825	-99.9	4.4566	999	RLQSLQTYV	RLQSLQTYV	RLQSLQTYV	0.0026	-99.9	4.6827	0.0134	0	4.6827
827	LADAGFIKQY	Sequence	LADAGFIQY	LADAGFIKQY	0.0824	-99.9	4.4577	420	YNYKLPDDF	YNYKLPDDF	YNYKLPDDF	0.0026	-99.9	4.6864	0.1946	1	1.0826
1128	VIGIVNNTVY	Sequence	VIIVNNTVY	VIGIVNNTVY	0.082	-99.9	4.4699	318	RVQPTESIVRF	RVQPTIVRF	RVQPTESIVRF	0.0026	-99.9	4.6877	0.0198	0	4.6877
1220	IAGLIAIVM	Sequence	IAGLIAIVM	IAGLIAIVM	0.082	-99.9	4.4708	358	SNCVADYSVLY	SVADYSVLY	SNCVADYSVLY	0.0025	-99.9	4.7074	0.0098	0	4.7074
1051	FPQSAPHGVVF	Sequence	FSAPHGVVF	FPQSAPHGVVF	0.0816	-99.9	4.4834	1064	VTYVPAQEK	VTYVPAQEK	VTYVPAQEK	0.0025	-99.9	4.716	0.0048	0	4.716
35	VYYPDKVF	Sequence	VYY-PDKVF	VYYPDKVF	0.0814	-99.9	4.489	844	AARDLICAQ	AARDLICAQ	AARDLICAQ	0.0025	-99.9	4.716	0.004	0	4.716
894	QIPFAMQM	Sequence	#NAME?	QIPFAMQM	0.0814	-99.9	4.4903	259	AGAAAYYVGY	AAAAYYVGY	AGAAAYYVGY	0.0025	-99.9	4.7346	0.0369	0	4.7346
191	FVFKNIDGYF	Sequence	FVFKNDGYF	FVFKNIDGYF	0.0803	-99.9	4.5304	337	FGEVFNATRF	FGVFNATRF	FGEVFNATRF	0.0025	-99.9	4.737	0.059	0	3.6012
846	RDLICAQKF	Sequence	RDLICAQKF	RDLICAQKF	0.08	-99.9	4.5443	873	TSALLAGTI	TSALLAGTI	TSALLAGTI	0.0025	-99.9	4.7407	0.0041	0	4.7407
257	WTAGAAAY	Sequence	WTA-GAAAY	WTAGAAAY	0.0797	-99.9	4.5568	718	TISVTTEIL	TISVTTEIL	TISVTTEIL	0.0025	-99.9	4.7593	0.0042	0	4.7593
917	ENQKLIANQF	Sequence	EQKLIANQF	ENQKLIANQF	0.0791	-99.9	4.5815	369	NSASFSTF	NSA-SFSTF	NSASFSTF	0.0025	-99.9	4.784	0.0299	0	4.784
367	LYNSASFSTF	Sequence	LNSASFSTF	LYNSASFSTF	0.0784	-99.9	4.6138	706	YSNNSIAI	YSN-NSIAI	YSNNSIAI	0.0024	-99.9	4.8272	0.0049	0	4.8272
1066	YVPAQEKNF	Sequence	YVPAQEKNF	YVPAQEKNF	0.0783	-99.9	4.6192	730	MTKTSVDCTMY	MTKTSVTMY	MTKTSVDCTMY	0.0024	-99.9	4.8346	0.0025	0	4.8346
632	WRVYSTGSNVF	Sequence	WRVTGSNVF	WRVYSTGSNVF	0.0779	-99.9	4.6342	238	QTLLALHRSY	QTLLAHRSY	QTLLALHRSY	0.0024	-99.9	4.8642	0.0239	0	4.8642
998	GRLQSLQTYV	Sequence	GRLQSLQTY	GRLQSLQTY	0.0778	-99.9	4.6378	676	QTNSPRRAR	QTNSPRRAR	QTNSPRRAR	0.0024	-99.9	4.8827	0.0016	0	4.8827
303	KSFTVEKGIY	Sequence	KSFTEKGIY	KSFTVEKGIY	0.0762	-99.9	4.7086	150	SWMESEFRVY	SMESEFRVY	SWMESEFRVY	0.0024	-99.9	4.9037	0.0555	0	3.7525
623	IHADQLTPTW	Sequence	IHADQLTTW	IHADQLTPTW	0.0759	-99.9	4.7189	964	QLSSNFGAI	QLSSNFGAI	QLSSNFGAI	0.0024	-99.9	4.9123	0.0123	0	4.9123
213	RDLPQGFSAL	Sequence	RDLPGFSAL	RDLPQGFSAL	0.0752	-99.9	4.7524	859	VLPPLLTDEM	VLPPLLTEM	VLPPLLTDEM	0.0024	-99.9	4.9185	0.0054	0	4.9185
76	KRFDNPVLP	Sequence	KRFDNPVLP	KRFDNPVLP	0.0742	-99.9	4.7916	247	YLTPGDSSSGW	YLTPGDSSW	YLTPGDSSSGW	0.0024	-99.9	4.9198	0.007	0	4.9198
903	YRFNGIGV	Sequence	YRF-NGIGV	YRFNGIGV	0.0741	-99.9	4.7998	1074	FTTAPAICH	FTTAPAICH	FTTAPAICH	0.0023	-99.9	4.9432	0.0017	0	4.9432
893	LQIPFAMQMA	Sequence	LQIPFAMQM	LQIPFAMQM	0.074	-99.9	4.8007	40	KVFRSSVLH	KVFRSSVLH	KVFRSSVLH	0.0023	-99.9	4.9444	0.0142	0	4.9444
903	YRFNGIGVTQ	Sequence	YRFNGGVTQ	YRFNGIGVTQ	0.0733	-99.9	4.8343	54	FLPFFSNVTW	FLPFSNVTW	FLPFFSNVTW	0.0023	-99.9	4.9716	0.0094	0	4.9716
710	SIAIPTNF	Sequence	SIA-IPTNF	SIAIPTNF	0.0732	-99.9	4.8354	568	IADTTDAVR	IADTTDAVR	IADTTDAVR	0.0023	-99.9	4.9765	0.0022	0	4.9765
663	IPIGAGICASY	Sequence	IPIGAGISY	IPIGAGICASY	0.0724	-99.9	4.8719	686	VASQSIIAYT	VASQSIIAY	VASQSIIAY	0.0023	-99.9	5.0033	0.0191	0	5.0033
332	TNLCPFGEVF	Sequence	TNLPFGEVF	TNLCPFGEVF	0.0718	-99.9	4.8962	966	SSNFGAISSV	SSFGAISSV	SSNFGAISSV	0.0023	-99.9	5.0244	0.0056	0	5.0244
15	VNLTTRTQL	Sequence	VNLTTRTQL	VNLTTRTQL	0.0713	-99.9	4.9176	385	KLNDLCFTNVY	KLNDLTNVY	KLNDLCFTNVY	0.0023	-99.9	5.0391	0.0634	0	3.4201
259	AGAAAYYVGY	Sequence	AAAAYYVGY	AGAAAYYVGY	0.0712	-99.9	4.9221	1225	AIVMVTIML	AIVMVTIML	AIVMVTIML	0.0023	-99.9	5.044	0.01	0	5.044
193	FKNIDGYFKIY	Sequence	FKNIDGKIY	FKNIDGYFKIY	0.0711	-99.9	4.9276	413	QTGKIADYNY	QTKIADYNY	QTGKIADYNY	0.0023	-99.9	5.0472	0.0043	0	5.0472
496	FQPTNGVGYQ	Sequence	FQPTNGVGY	FQPTNGVGY	0.071	-99.9	4.9293	240	LLALHRSY	LLA-LHRSY	LLALHRSY	0.0023	-99.9	5.0717	0.0582	0	3.6327
305	FTVEKGIY	Sequence	FTVEKGI-Y	FTVEKGIY	0.0703	-99.9	4.9599	29	NSFTRGVYYP	NSFTRGVYY	NSFTRGVYY	0.0023	-99.9	5.0733	0.0075	0	5.0733
781	FAQVKQIY	Sequence	FAQ-VKQIY	FAQVKQIY	0.0702	-99.9	4.9633	48	HSTQDLFLPF	HTQDLFLPF	HSTQDLFLPF	0.0022	-99.9	5.0863	0.0161	0	5.0863
561	FQQFGRDIA	Sequence	FQQFGRDIA	FQQFGRDIA	0.0702	-99.9	4.9662	143	YYHKNNKSWM	YYHKNNKSM	YYHKNNKSWM	0.0022	-99.9	5.0863	0.0071	0	5.0863
361	VADYSVLY	Sequence	VA-DYSVLY	VADYSVLY	0.0702	-99.9	4.9663	1057	HGVVFLHVTY	HVVFLHVTY	HGVVFLHVTY	0.0022	-99.9	5.0896	0.0226	0	5.0896
210	NLVRDLPQGF	Sequence	NLRDLPQGF	NLVRDLPQGF	0.0702	-99.9	4.967	724	EILPVSMTK	EILPVSMTK	EILPVSMTK	0.0022	-99.9	5.101	0.0021	0	5.101
1130	GIVNNTVY	Sequence	GIV-NNTVY	GIVNNTVY	0.0699	-99.9	4.9786	369	NSASFSTFK	NSASFSTFK	NSASFSTFK	0.0022	-99.9	5.1205	0.0014	0	5.1205
55	LPFFSNVTW	Sequence	LPFFSNVTW	LPFFSNVTW	0.0699	-99.9	4.9801	914	VLYENQKL	VLYEN-QKL	VLYENQKL	0.0022	-99.9	5.1417	0.015	0	5.1417
341	FNATRFASVY	Sequence	FNATFASVY	FNATRFASVY	0.0695	-99.9	4.9943	502	VGYQPYRVV	VGYQPYRVV	VGYQPYRVV	0.0022	-99.9	5.1466	0.0343	0	5.144
446	GNYNYLYRL	Sequence	GNYNYLYRL	GNYNYLYRL	0.0695	-99.9	4.995	611	YQDVNCTEV	YQDVNCTEV	YQDVNCTEV	0.0022	-99.9	5.1596	0.0259	0	5.1596
440	LDSKVGGNYNY	Sequence	LKVGGNYNY	LDSKVGGNYNY	0.0694	-99.9	5.0006	710	SIAIPTNFTI	SAIPTNFTI	SIAIPTNFTI	0.0022	-99.9	5.1596	0.0062	0	5.1596
1189	AKNLNESLI	Sequence	AKNLNESLI	AKNLNESLI	0.0693	-99.9	5.0035	1168	ISGINASVV	ISGINASVV	ISGINASVV	0.0022	-99.9	5.2085	0.003	0	5.2085
261	AAAYYVGY	Sequence	AAA-YYVGY	AAAYYVGY	0.069	-99.9	5.0191	414	TGKIADYNY	TGKIADYNY	TGKIADYNY	0.0022	-99.9	5.2199	0.066	0	3.3259
967	SNFGAISSVL	Sequence	SNFGAISSL	SNFGAISSVL	0.0688	-99.9	5.0303	1135	TVYDPLQPE	TVYDPLQPE	TVYDPLQPE	0.0022	-99.9	5.2215	0.0025	0	5.2215
234	ITRFQTLLAL	Sequence	IRFQTLLAL	ITRFQTLLAL	0.0681	-99.9	5.0633	261	AAAYYVGY	AAA-YYVGY	AAAYYVGY	0.0022	-99.9	5.2313	0.0356	0	5.0191
717	FTISVTTEI	Sequence	FTISVTTEI	FTISVTTEI	0.0678	-99.9	5.0764	68	HVSGTNGTKRF	HVSGTNGTF	HVSGTNGTKRF	0.0022	-99.9	5.2313	0.0073	0	5.2313
494	YGFQPTNGV	Sequence	YGFQPTNGV	YGFQPTNGV	0.0671	-99.9	5.114	747	ECSNLLLQY	ECSNLLLQY	ECSNLLLQY	0.0021	-99.9	5.2524	0.0092	0	5.2524
502	VGYQPYRVV	Sequence	VGYQPYRVV	VGYQPYRVV	0.0665	-99.9	5.144	228	LPIGINITR	LPIGINITR	LPIGINITR	0.0021	-99.9	5.2524	0.005	0	5.2524
826	TLADAGFIKQY	Sequence	TLADAGKQY	TLADAGFIKQY	0.0661	-99.9	5.1635	720	SVTTEILPV	SVTTEILPV	SVTTEILPV	0.0021	-99.9	5.2541	0.004	0	5.2541
1084	GKAHFPREGVF	Sequence	GKFPREGVF	GKAHFPREGVF	0.0661	-99.9	5.1641	1085	KAHFPREGV	KAHFPREGV	KAHFPREGV	0.0021	-99.9	5.2573	0.0087	0	5.2573
111	SKTQSLLIV	Sequence	SKTQSLLIV	SKTQSLLIV	0.0656	-99.9	5.1883	444	VGGNYNYLY	VGGNYNYLY	VGGNYNYLY	0.0021	-99.9	5.272	0.0669	0	3.292
324	SIVRFPNITNL	Sequence	SRFPNITNL	SIVRFPNITNL	0.0653	-99.9	5.203	704	VAYSNNSI	VAYSN-NSI	VAYSNNSI	0.0021	-99.9	5.3143	0.0118	0	5.3143
119	VNNATNVVI	Sequence	VNNATNVVI	VNNATNVVI	0.0651	-99.9	5.2143	49	STQDLFLPFF	STQDLFLPF	STQDLFLPFF	0.0021	-99.9	5.3257	0.0209	0	5.3257
1099	THWFVTQRNF	Sequence	THWFVTQRF	THWFVTQRNF	0.0649	-99.9	5.221	331	ITNLCPFGEVF	ITNPFGEVF	ITNLCPFGEVF	0.0021	-99.9	5.3274	0.0076	0	5.3274
310	GIYQTSNF	Sequence	GIYQTSN-F	GIYQTSNF	0.0646	-99.9	5.237	820	LLFNKVTLA	LLFNKVTLA	LLFNKVTLA	0.0021	-99.9	5.3322	0.0158	0	5.3322
751	LLLQYGSF	Sequence	LLLQYG-SF	LLLQYGSF	0.0642	-99.9	5.2585	1023	LAATKMSEC	LAATKMSEC	LAATKMSEC	0.0021	-99.9	5.3355	0.0014	0	5.3355
1136	VYDPLQPEL	Sequence	VYDPLQPEL	VYDPLQPEL	0.0638	-99.9	5.2781	249	TPGDSSSGW	TPGDSSSGW	TPGDSSSGW	0.0021	-99.9	5.3404	0.0063	0	5.3404
994	RLITGRLQSL	Sequence	RLITGRQSL	RLITGRLQSL	0.0628	-99.9	5.3282	750	NLLLQYGSF	NLLLQYGSF	NLLLQYGSF	0.0021	-99.9	5.3779	0.0672	0	3.2798
1205	YEQYIKWPW	Sequence	YEQYIKWPW	YEQYIKWPW	0.0617	-99.9	5.3795	1215	IWLGFIAGL	IWLGFIAGL	IWLGFIAGL	0.002	-99.9	5.4137	0.0112	0	5.4137
704	VAYSNNSIA	Sequence	VAYSNNSIA	VAYSNNSIA	0.0613	-99.9	5.3988	628	LTPTWRVY	LT-PTWRVY	LTPTWRVY	0.002	-99.9	5.4169	0.0145	0	5.4169
387	NDLCFTNVY	Sequence	NDLCFTNVY	NDLCFTNVY	0.0609	-99.9	5.4221	982	RLDKVEAEV	RLDKVEAEV	RLDKVEAEV	0.002	-99.9	5.4169	0.0098	0	5.4169
481	GVEGFNCYF	Sequence	GVEGFNCYF	GVEGFNCYF	0.0606	-99.9	5.4366	1172	NASVVNIQK	NASVVNIQK	NASVVNIQK	0.002	-99.9	5.4251	0.0015	0	5.4251
136	NDPFLGVYY	Sequence	NDPFLGVYY	NDPFLGVYY	0.0599	-99.9	5.4699	994	RLITGRLQSL	RLITGLQSL	RLITGRLQSL	0.002	-99.9	5.4283	0.0324	0	5.3282
226	VDLPIGINI	Sequence	VDLPIGINI	VDLPIGINI	0.0596	-99.9	5.482	310	GIYQTSNF	GIY-QTSNF	GIYQTSNF	0.002	-99.9	5.443	0.0333	0	5.237
78	FDNPVLPF	Sequence	FDN-PVLPF	FDNPVLPF	0.0595	-99.9	5.4869	901	MAYRFNGIGV	MAYFNGIGV	MAYRFNGIGV	0.002	-99.9	5.4691	0.0031	0	5.4691
95	EKSNIIRGW	Sequence	EKSNIIRGW	EKSNIIRGW	0.0595	-99.9	5.4872	399	FVIRGDEVR	FVIRGDEVR	FVIRGDEVR	0.002	-99.9	5.4853	0.0017	0	5.4853
708	NNSIAIPTNF	Sequence	NSIAIPTNF	NNSIAIPTNF	0.0594	-99.9	5.4946	779	EVFAQVKQI	EVFAQVKQI	EVFAQVKQI	0.002	-99.9	5.5063	0.0058	0	5.5063
166	TFEYVSQPF	Sequence	TFEYVSQPF	TFEYVSQPF	0.0589	-99.9	5.5243	626	DQLTPTWRVY	DQLTPTRVY	DQLTPTWRVY	0.002	-99.9	5.5314	0.1544	1	1.4325
230	IGINITRF	Sequence	IGI-NITRF	IGINITRF	0.0582	-99.9	5.563	813	KRSFIEDLLF	KSFIEDLLF	KRSFIEDLLF	0.002	-99.9	5.5418	0.1529	1	1.4529
369	NSASFSTF	Sequence	NSA-SFSTF	NSASFSTF	0.0573	-99.9	5.6154	1094	FVSNGTHWFV	FVSNGTHFV	FVSNGTHWFV	0.002	-99.9	5.5628	0.0016	0	5.5628
149	KSWMESEF	Sequence	KSWME-SEF	KSWMESEF	0.0571	-99.9	5.6288	61	VTWFHAIHV	VTWFHAIHV	VTWFHAIHV	0.002	-99.9	5.5732	0.0051	0	5.5732
415	GKIADYNYKL	Sequence	GKIDYNYKL	GKIADYNYKL	0.0568	-99.9	5.6457	232	INITRFQTL	INITRFQTL	INITRFQTL	0.002	-99.9	5.5816	0.1011	0	2.3267
1105	QRNFYEPQI	Sequence	QRNFYEPQI	QRNFYEPQI	0.0564	-99.9	5.6728	1095	VSNGTHWFV	VSNGTHWFV	VSNGTHWFV	0.002	-99.9	5.5837	0.0033	0	5.5837
1049	MSFPQSAPH	Sequence	MSFPQSAPH	MSFPQSAPH	0.0562	-99.9	5.6833	1051	FPQSAPHGV	FPQSAPHGV	FPQSAPHGV	0.002	-99.9	5.5879	0.0037	0	5.5879
393	NVYADSFVI	Sequence	NVYADSFVI	NVYADSFVI	0.0558	-99.9	5.7047	219	FSALEPLVDL	FSALEPLVL	FSALEPLVDL	0.0019	-99.9	5.6423	0.0019	0	5.6423
688	SQSIIAYTMSL	Sequence	SQIAYTMSL	SQSIIAYTMSL	0.0548	-99.9	5.7649	868	MIAQYTSALL	MIAQYTSAL	MIAQYTSALL	0.0019	-99.9	5.6548	0.0024	0	5.6548
898	AMQMAYRF	Sequence	AMQMA-YRF	AMQMAYRF	0.054	-99.9	5.8123	485	FNCYFPLQSY	FNYFPLQSY	FNCYFPLQSY	0.0019	-99.9	5.6569	0.0629	0	3.4327
852	QKFNGLTV	Sequence	QKF-NGLTV	QKFNGLTV	0.054	-99.9	5.814	498	PTNGVGYQPY	PTNGVGYQY	PTNGVGYQPY	0.0019	-99.9	5.6632	0.0032	0	5.6632
228	LPIGINITRF	Sequence	LPIGNITRF	LPIGINITRF	0.0538	-99.9	5.8242	1037	KRVDFCGKGY	KRVDFGKGY	KRVDFCGKGY	0.0019	-99.9	5.6653	0.2236	1	0.8909
339	EVFNATRF	Sequence	EVF-NATRF	EVFNATRF	0.0534	-99.9	5.8492	685	SVASQSIIA	SVASQSIIA	SVASQSIIA	0.0019	-99.9	5.6715	0.0059	0	5.6715
410	APGQTGKIADY	Sequence	AQTGKIADY	APGQTGKIADY	0.0524	-99.9	5.9039	339	EVFNATRF	EVF-NATRF	EVFNATRF	0.0019	-99.9	5.6946	0.0276	0	5.6946
406	VRQIAPGQTG	Sequence	VQIAPGQTG	VRQIAPGQTG	0.0521	-99.9	5.9221	254	SSGWTAGAAAY	SSTAGAAAY	SSGWTAGAAAY	0.0019	-99.9	5.7259	0.0058	0	5.7259
30	SFTRGVYY	Sequence	S-FTRGVYY	SFTRGVYY	0.0514	-99.9	5.968	694	YTMSLGAEN	YTMSLGAEN	YTMSLGAEN	0.0019	-99.9	5.7531	0.0014	0	5.7531
443	KVGGNYNY	Sequence	KV-GGNYNY	KVGGNYNY	0.0511	-99.9	5.984	1219	FIAGLIAI	FIA-GLIAI	FIAGLIAI	0.0019	-99.9	5.7678	0.002	0	5.7678
1093	VFVSNGTHWF	Sequence	VFVSNGTHF	VFVSNGTHWF	0.0506	-99.9	6.0183	125	VVIKVCEF	VVI-KVCEF	VVIKVCEF	0.0018	-99.9	5.8117	0.0085	0	5.8117
176	MDLEGKQGNF	Sequence	MDLEGKQNF	MDLEGKQGNF	0.0506	-99.9	6.0187	509	VVVLSFELL	VVVLSFELL	VVVLSFELL	0.0018	-99.9	5.8222	0.0057	0	5.8222
1092	GVFVSNGTHW	Sequence	GVFSNGTHW	GVFVSNGTHW	0.0504	-99.9	6.0301	942	SALGKLQDV	SALGKLQDV	SALGKLQDV	0.0018	-99.9	5.8305	0.0041	0	5.8305
960	TLVKQLSSNF	Sequence	TLVKQLSSF	TLVKQLSSNF	0.0503	-99.9	6.037	797	GGFNFSQIL	GGFNFSQIL	GGFNFSQIL	0.0018	-99.9	5.8703	0.0478	0	4.112
213	RDLPQGFSA	Sequence	RDLPQGFSA	RDLPQGFSA	0.0499	-99.9	6.0648	808	PSKPSKRSF	PSKPSKRSF	PSKPSKRSF	0.0018	-99.9	5.887	0.0202	0	5.887
611	YQDVNCTEV	Sequence	YQDVNCTEV	YQDVNCTEV	0.0497	-99.9	6.0839	789	KTPPIKDF	KTPPIKD-F	KTPPIKDF	0.0018	-99.9	5.8891	0.0067	0	5.8891
1101	WFVTQRNFY	Sequence	WFVTQRNFY	WFVTQRNFY	0.0494	-99.9	6.1054	1262	PVLKGVKLHY	VLKGVKLHY	VLKGVKLHY	0.0018	-99.9	5.8933	0.0093	0	5.8933
581	LEILDITPCSF	Sequence	LEILDITSF	LEILDITPCSF	0.0491	-99.9	6.1269	1206	EQYIKWPWY	EQYIKWPWY	EQYIKWPWY	0.0018	-99.9	5.9268	0.1438	1	1.5735
1053	QSAPHGVVFL	Sequence	QSAPHGVVF	QSAPHGVVF	0.0491	-99.9	6.1295	763	NRALTGIAV	NRALTGIAV	NRALTGIAV	0.0018	-99.9	5.9268	0.0914	0	2.5437
21	TQLPPAYTN	Sequence	TQLPPAYTN	TQLPPAYTN	0.0489	-99.9	6.1439	1044	KGYHLMSF	KGY-HLMSF	KGYHLMSF	0.0018	-99.9	5.931	0.0692	0	3.2023
134	FCNDPFLGVY	Sequence	FCNDPFLVY	FCNDPFLGVY	0.048	-99.9	6.2064	933	IQDSLSSTA	IQDSLSSTA	IQDSLSSTA	0.0018	-99.9	5.954	0.0912	0	2.5482
94	TEKSNIIRGW	Sequence	TEKSNIIRW	TEKSNIIRGW	0.0477	-99.9	6.227	904	RFNGIGVTQ	RFNGIGVTQ	RFNGIGVTQ	0.0018	-99.9	5.9561	0.0189	0	5.9561
327	RFPNITNL	Sequence	R-FPNITNL	RFPNITNL	0.0477	-99.9	6.2293	1006	YVTQQLIRA	YVTQQLIRA	YVTQQLIRA	0.0018	-99.9	5.9812	0.0029	0	5.9812
703	SVAYSNNSI	Sequence	SVAYSNNSI	SVAYSNNSI	0.047	-99.9	6.2796	247	YLTPGDSSS	YLTPGDSSS	YLTPGDSSS	0.0018	-99.9	5.9812	0.0028	0	5.9812
869	IAQYTSALL	Sequence	IAQYTSALL	IAQYTSALL	0.0469	-99.9	6.2868	1208	YIKWPWYIW	YIKWPWYIW	YIKWPWYIW	0.0018	-99.9	5.9916	0.0071	0	5.9916
696	MSLGAENSVAY	Sequence	MSAENSVAY	MSLGAENSVAY	0.0468	-99.9	6.2932	107	TTLDSKTQSL	TTLDSTQSL	TTLDSKTQSL	0.0018	-99.9	6.0072	0.0036	0	6.0072
1033	LGQSKRVDF	Sequence	LGQSKRVDF	LGQSKRVDF	0.0456	-99.9	6.3828	234	ITRFQTLLAL	ITRQTLLAL	ITRFQTLLAL	0.0018	-99.9	6.0121	0.0349	0	5.0633
238	QTLLALHRSY	Sequence	QLLALHRSY	QTLLALHRSY	0.0454	-99.9	6.4002	301	TLKSFTVEK	TLKSFTVEK	TLKSFTVEK	0.0018	-99.9	6.0145	0.0026	0	6.0145
508	RVVVLSFEL	Sequence	RVVVLSFEL	RVVVLSFEL	0.0453	-99.9	6.405	826	TLADAGFIK	TLADAGFIK	TLADAGFIK	0.0017	-99.9	6.0338	0.0033	0	6.0338
894	QIPFAMQMAY	Sequence	QIFAMQMAY	QIPFAMQMAY	0.0452	-99.9	6.4157	348	SVYAWNRKR	SVYAWNRKR	SVYAWNRKR	0.0017	-99.9	6.0362	0.0023	0	6.0362
443	KVGGNYNYLY	Sequence	KVGGNYNLY	KVGGNYNYLY	0.0449	-99.9	6.4361	1092	GVFVSNGTH	GVFVSNGTH	GVFVSNGTH	0.0017	-99.9	6.0411	0.0089	0	6.0411
454	LFRKSNLKPF	Sequence	LRKSNLKPF	LFRKSNLKPF	0.0448	-99.9	6.444	1064	VTYVPAQEKNF	VTYVPAQEF	VTYVPAQEKNF	0.0017	-99.9	6.0507	0.0052	0	6.0507
160	SSANNCTFEY	Sequence	SSANNTFEY	SSANNCTFEY	0.0446	-99.9	6.4617	972	ISSVLNDIL	ISSVLNDIL	ISSVLNDIL	0.0017	-99.9	6.099	0.0043	0	6.099
261	AAAYYVGYL	Sequence	AAAYYVGYL	AAAYYVGYL	0.0446	-99.9	6.4621	739	MYICGDSTE	MYICGDSTE	MYICGDSTE	0.0017	-99.9	6.1063	0.0012	0	6.1063
851	AQKFNGLT	Sequence	AQKFNGLT-	AQKFNGLT	0.0441	-99.9	6.4977	30	SFTRGVYY	#NAME?	SFTRGVYY	0.0017	-99.9	6.1135	0.0265	0	5.968
884	GWTFGAGAAL	Sequence	GTFGAGAAL	GWTFGAGAAL	0.044	-99.9	6.5063	1007	VTQQLIRAA	VTQQLIRAA	VTQQLIRAA	0.0017	-99.9	6.1159	0.0054	0	6.1159
1148	KEELDKYF	Sequence	KE-ELDKYF	KEELDKYF	0.0439	-99.9	6.5123	83	LPFNDGVY	LPFNDGV-Y	LPFNDGVY	0.0017	-99.9	6.1498	0.0472	0	4.1451
990	VQIDRLITGRL	Sequence	VQIDRLITL	VQIDRLITGRL	0.0439	-99.9	6.5144	1088	FPREGVFVS	FPREGVFVS	FPREGVFVS	0.0017	-99.9	6.1546	0.0038	0	6.1546
204	SKHTPINL	Sequence	SKH-TPINL	SKHTPINL	0.0438	-99.9	6.5269	230	IGINITRF	IGI-NITRF	IGINITRF	0.0017	-99.9	6.1667	0.03	0	5.563
462	PFERDISTEIY	Sequence	FERDISTEY	FERDISTEIY	0.0436	-99.9	6.5414	657	NSYECDIPI	NSYECDIPI	NSYECDIPI	0.0017	-99.9	6.1667	0.002	0	6.1667
778	QEVFAQVKQIY	Sequence	QEAQVKQIY	QEVFAQVKQIY	0.0433	-99.9	6.5713	248	LTPGDSSSGW	LTPGDSSSW	LTPGDSSSGW	0.0017	-99.9	6.1739	0.002	0	6.1739
354	RKRISNCVADY	Sequence	RKRISNCVY	RKRISNCVADY	0.0432	-99.9	6.5742	97	SNIIRGWIF	SNIIRGWIF	SNIIRGWIF	0.0017	-99.9	6.2077	0.1438	1	1.5732
45	SVLHSTQDLF	Sequence	SLHSTQDLF	SVLHSTQDLF	0.0431	-99.9	6.5861	269	LQPRTFLLKY	LQPRTFLLY	LQPRTFLLKY	0.0017	-99.9	6.2367	0.117	1	1.9879
307	VEKGIYQTS	Sequence	VEKGIYQTS	VEKGIYQTS	0.0431	-99.9	6.5872	355	KRISNCVADY	KRISNCVAY	KRISNCVADY	0.0017	-99.9	6.244	0.195	1	1.0761
1057	HGVVFLHVTY	Sequence	HVVFLHVTY	HGVVFLHVTY	0.043	-99.9	6.5935	381	VSPTKLNDL	VSPTKLNDL	VSPTKLNDL	0.0017	-99.9	6.2488	0.0016	0	6.2488
659	YECDIPIGA	Sequence	YECDIPIGA	YECDIPIGA	0.043	-99.9	6.5995	262	AAYYVGYLQ	AAYYVGYLQ	AAYYVGYLQ	0.0017	-99.9	6.2512	0.0044	0	6.2512
675	TQTNSPRRA	Sequence	TQTNSPRRA	TQTNSPRRA	0.0428	-99.9	6.6184	167	FEYVSQPFL	FEYVSQPFL	FEYVSQPFL	0.0016	-99.9	6.256	0.1275	1	1.8115
158	VYSSANNCTF	Sequence	VYSSANNTF	VYSSANNCTF	0.0427	-99.9	6.6252	870	AQYTSALLA	AQYTSALLA	AQYTSALLA	0.0016	-99.9	6.2778	0.2085	1	0.9792
809	SKPSKRSF	Sequence	SK-PSKRSF	SKPSKRSF	0.0426	-99.9	6.6378	713	IPTNFTISV	IPTNFTISV	IPTNFTISV	0.0016	-99.9	6.3019	0.0038	0	6.3019
1139	PLQPELDSF	Sequence	PLQPELDSF	PLQPELDSF	0.0416	-99.9	6.7262	40	KVFRSSVL	KVF-RSSVL	KVFRSSVL	0.0016	-99.9	6.3164	0.0091	0	6.3164
684	RSVASQSII	Sequence	RSVASQSII	RSVASQSII	0.0416	-99.9	6.7279	189	REFVFKNIDGY	RVFKNIDGY	REFVFKNIDGY	0.0016	-99.9	6.3357	0.1112	0	2.1079
992	IDRLITGRL	Sequence	IDRLITGRL	IDRLITGRL	0.0412	-99.9	6.7698	168	EYVSQPFLM	EYVSQPFLM	EYVSQPFLM	0.0016	-99.9	6.3382	0.0132	0	6.3382
722	TTEILPVSM	Sequence	TTEILPVSM	TTEILPVSM	0.0408	-99.9	6.8048	1018	RASANLAATKM	RASANLAAM	RASANLAATKM	0.0016	-99.9	6.3406	0.0026	0	6.3406
870	AQYTSALLAG	Sequence	AQYSALLAG	AQYTSALLAG	0.0402	-99.9	6.8614	165	CTFEYVSQPF	CTFEVSQPF	CTFEYVSQPF	0.0016	-99.9	6.3575	0.0089	0	6.3575
1002	SLQTYVTQQL	Sequence	SQTYVTQQL	SLQTYVTQQL	0.0402	-99.9	6.8624	682	RARSVASQSI	RARSVASSI	RARSVASQSI	0.0016	-99.9	6.3623	0.0116	0	6.3623
76	KRFDNPVLPFN	Sequence	KRFDNPVLF	KRFDNPVLPF	0.0401	-99.9	6.8663	1055	APHGVVFLH	APHGVVFLH	APHGVVFLH	0.0016	-99.9	6.3671	0.0091	0	6.3671
939	STASALGKL	Sequence	STASALGKL	STASALGKL	0.0401	-99.9	6.8712	234	ITRFQTLLA	ITRFQTLLA	ITRFQTLLA	0.0016	-99.9	6.3671	0.0019	0	6.3671
488	YFPLQSYGF	Sequence	YFPLQSYGF	YFPLQSYGF	0.04	-99.9	6.8779	1145	DSFKEELDKY	DSFEELDKY	DSFKEELDKY	0.0016	-99.9	6.372	0.0072	0	6.372
201	KIYSKHTPI	Sequence	KIYSKHTPI	KIYSKHTPI	0.04	-99.9	6.8785	324	SIVRFPNITNL	SIFPNITNL	SIVRFPNITNL	0.0016	-99.9	6.3744	0.0334	0	5.203
258	TAGAAAYY	Sequence	TA-GAAAYY	TAGAAAYY	0.0399	-99.9	6.891	296	SETKCTLKSF	STKCTLKSF	SETKCTLKSF	0.0016	-99.9	6.4058	0.0883	0	2.6249
49	STQDLFLPFF	Sequence	SQDLFLPFF	STQDLFLPFF	0.0397	-99.9	6.9096	1113	IITTDNTF	IIT-TDNTF	IITTDNTF	0.0016	-99.9	6.4155	0.0192	0	6.4155
533	VKNKCVNF	Sequence	VKNKCVN-F	VKNKCVNF	0.0397	-99.9	6.911	907	GIGVTQNVLY	GIVTQNVLY	GIGVTQNVLY	0.0016	-99.9	6.4155	0.0111	0	6.4155
182	QGNFKNLREF	Sequence	QNFKNLREF	QGNFKNLREF	0.0395	-99.9	6.9249	366	VLYNSASFSTF	VLYNSASTF	VLYNSASFSTF	0.0016	-99.9	6.4469	0.0511	0	3.9287
1014	AAEIRASANL	Sequence	AEIRASANL	AAEIRASANL	0.0393	-99.9	6.9446	1127	VVIGIVNNT	VVIGIVNNT	VVIGIVNNT	0.0016	-99.9	6.4493	0.0023	0	6.4493
815	SFIEDLLF	Sequence	SFIED-LLF	SFIEDLLF	0.039	-99.9	6.9688	408	QIAPGQTGK	QIAPGQTGK	QIAPGQTGK	0.0016	-99.9	6.4565	0.0012	0	6.4565
899	MQMAYRFNG	Sequence	MQMAYRFNG	MQMAYRFNG	0.039	-99.9	6.9708	160	SSANNCTF	SSA-NNCTF	SSANNCTF	0.0015	-99.9	6.4976	0.0144	0	6.4976
21	TQLPPAYT	Sequence	TQLPPAYT-	TQLPPAYT	0.039	-99.9	6.9731	50	TQDLFLPFF	TQDLFLPFF	TQDLFLPFF	0.0015	-99.9	6.5029	0.1251	1	1.8518
808	PSKPSKRSF	Sequence	PSKPSKRSF	PSKPSKRSF	0.0387	-99.9	7.005	745	STECSNLLL	STECSNLLL	STECSNLLL	0.0015	-99.9	6.5405	0.0018	0	6.5405
1012	IRAAEIRAS	Sequence	IRAAEIRAS	IRAAEIRAS	0.0386	-99.9	7.0118	323	ESIVRFPNI	ESIVRFPNI	ESIVRFPNI	0.0015	-99.9	6.6243	0.0013	0	6.6243
59	SNVTWFHAI	Sequence	SNVTWFHAI	SNVTWFHAI	0.0386	-99.9	7.0152	1180	KEIDRLNEV	KEIDRLNEV	KEIDRLNEV	0.0015	-99.9	6.6503	0.1891	1	1.1178
267	GYLQPRTFL	Sequence	GYLQPRTFL	GYLQPRTFL	0.0378	-99.9	7.0966	96	KSNIIRGWIF	KSNIIRGIF	KSNIIRGWIF	0.0015	-99.9	6.6503	0.0173	0	6.6503
256	GWTAGAAAYY	Sequence	GTAGAAAYY	GWTAGAAAYY	0.0376	-99.9	7.1156	327	RFPNITNL	RF-PNITNL	RFPNITNL	0.0015	-99.9	6.6647	0.0246	0	6.2293
189	REFVFKNI	Sequence	REF-VFKNI	REFVFKNI	0.0375	-99.9	7.1246	632	WRVYSTGSNVF	RVYSTGSVF	RVYSTGSNVF	0.0015	-99.9	6.6763	0.0397	0	4.6342
918	NQKLIANQFN	Sequence	NQKLIANQF	NQKLIANQF	0.0374	-99.9	7.1319	813	KRSFIEDLL	KRSFIEDLL	KRSFIEDLL	0.0015	-99.9	6.6965	0.0563	0	3.6972
823	NKVTLADAGF	Sequence	NKVTADAGF	NKVTLADAGF	0.0374	-99.9	7.1411	443	KVGGNYNY	KV-GGNYNY	KVGGNYNY	0.0015	-99.9	6.711	0.0263	0	5.984
135	CNDPFLGVY	Sequence	CNDPFLGVY	CNDPFLGVY	0.0373	-99.9	7.1488	144	YHKNNKSWM	YHKNNKSWM	YHKNNKSWM	0.0015	-99.9	6.7254	0.0434	0	4.3674
326	VRFPNITNLC	Sequence	VRFPNITNL	VRFPNITNL	0.0371	-99.9	7.1658	819	DLLFNKVTL	DLLFNKVTL	DLLFNKVTL	0.0015	-99.9	6.7283	0.0098	0	6.7283
318	RVQPTESIVRF	Sequence	RVQPTIVRF	RVQPTESIVRF	0.037	-99.9	7.1746	787	IYKTPPIKDF	IYKTPPIKF	IYKTPPIKDF	0.0015	-99.9	6.737	0.0684	0	3.2251
1113	IITTDNTF	Sequence	I-ITTDNTF	IITTDNTF	0.0368	-99.9	7.2011	1018	RASANLAATK	RASANLATK	RASANLAATK	0.0015	-99.9	6.7803	0.0013	0	6.7803
955	AQALNTLV	Sequence	AQALNTLV-	AQALNTLV	0.0368	-99.9	7.2016	433	IAWNSNNL	IAW-NSNNL	IAWNSNNL	0.0014	-99.9	6.7948	0.0059	0	6.7948
411	PGQTGKIADY	Sequence	GQTGKIADY	GQTGKIADY	0.0366	-99.9	7.2229	268	YLQPRTFL	YLQPRTF-L	YLQPRTFL	0.0014	-99.9	6.8208	0.0039	0	6.8208
589	CSFGGVSVI	Sequence	CSFGGVSVI	CSFGGVSVI	0.0364	-99.9	7.2378	974	SVLNDILSR	SVLNDILSR	SVLNDILSR	0.0014	-99.9	6.841	0.0025	0	6.841
904	RFNGIGVTQ	Sequence	RFNGIGVTQ	RFNGIGVTQ	0.0361	-99.9	7.277	69	VSGTNGTKRF	VSGTNGTRF	VSGTNGTKRF	0.0014	-99.9	6.9046	0.0144	0	6.9046
574	AVRDPQTLEI	Sequence	ARDPQTLEI	AVRDPQTLEI	0.036	-99.9	7.2873	789	KTPPIKDFGGF	KTPPIFGGF	KTPPIKDFGGF	0.0014	-99.9	6.9162	0.0044	0	6.9162
686	VASQSIIAYT	Sequence	VASQSIIAY	VASQSIIAY	0.0358	-99.9	7.3023	549	GVLTESNKKF	GVLESNKKF	GVLTESNKKF	0.0014	-99.9	6.9191	0.0182	0	6.9191
267	GYLQPRTF	Sequence	G-YLQPRTF	GYLQPRTF	0.0356	-99.9	7.3236	477	TPCNGVEGF	TPCNGVEGF	TPCNGVEGF	0.0014	-99.9	6.9249	0.0171	0	6.9249
1086	AHFPREGVFV	Sequence	AHFPREGVF	AHFPREGVF	0.0356	-99.9	7.3286	21	TQLPPAYTNSF	TQLPPTNSF	TQLPPAYTNSF	0.0014	-99.9	6.9277	0.3235	1	0.4073
446	GNYNYLYRLF	Sequence	GNYNLYRLF	GNYNYLYRLF	0.0351	-99.9	7.3778	885	WTFGAGAALQ	WTFGAGAAL	WTFGAGAAL	0.0014	-99.9	6.9451	0.0017	0	6.9451
549	GVLTESNKKF	Sequence	GVLESNKKF	GVLTESNKKF	0.035	-99.9	7.3872	81	PVLPFNDGVY	PVLPNDGVY	PVLPFNDGVY	0.0014	-99.9	6.9538	0.0045	0	6.9538
574	AVRDPQTL	Sequence	AVRDP-QTL	AVRDPQTL	0.035	-99.9	7.3873	291	ALDPLSETK	ALDPLSETK	ALDPLSETK	0.0014	-99.9	6.9653	0.0038	0	6.9653
681	RRARSVASQ	Sequence	RRARSVASQ	RRARSVASQ	0.0349	-99.9	7.3935	169	YVSQPFLMDL	YVSQPFLML	YVSQPFLMDL	0.0014	-99.9	6.9855	0.0019	0	6.9855
1146	SFKEELDKYF	Sequence	SKEELDKYF	SFKEELDKYF	0.0347	-99.9	7.4203	691	IIAYTMSL	IIA-YTMSL	IIAYTMSL	0.0014	-99.9	6.9884	0.0024	0	6.9884
304	SFTVEKGIY	Sequence	SFTVEKGIY	SFTVEKGIY	0.0346	-99.9	7.43	213	RDLPQGFSAL	RLPQGFSAL	RDLPQGFSAL	0.0014	-99.9	7.0074	0.0383	0	4.7524
986	VEAEVQIDRL	Sequence	VEAEVQIRL	VEAEVQIDRL	0.0344	-99.9	7.4461	666	GAGICASY	GA-GICASY	GAGICASY	0.0014	-99.9	7.0074	0.0077	0	7.0074
178	LEGKQGNF	Sequence	LEGKQG-NF	LEGKQGNF	0.0344	-99.9	7.4487	996	ITGRLQSLQTY	ITLQSLQTY	ITGRLQSLQTY	0.0014	-99.9	7.0221	0.0535	0	3.8177
463	FERDISTEIYQ	Sequence	FERDISTEY	FERDISTEIY	0.0343	-99.9	7.4597	55	LPFFSNVTWF	LPFFSNVTF	LPFFSNVTWF	0.0014	-99.9	7.0257	0.0122	0	7.0257
124	NVVIKVCEF	Sequence	NVVIKVCEF	NVVIKVCEF	0.0343	-99.9	7.4643	953	QNAQALNTL	QNAQALNTL	QNAQALNTL	0.0014	-99.9	7.0331	0.0577	0	3.635
17	LTTRTQLPPAY	Sequence	LRTQLPPAY	LTTRTQLPPAY	0.0341	-99.9	7.4847	820	LLFNKVTL	LLFNKV-TL	LLFNKVTL	0.0014	-99.9	7.0368	0.0173	0	7.0368
338	GEVFNATRFA	Sequence	GEVFNATRF	GEVFNATRF	0.0339	-99.9	7.5016	893	LQIPFAMQMAY	LQIPMQMAY	LQIPFAMQMAY	0.0014	-99.9	7.0588	0.2122	1	0.9562
924	NQFNSAIGKI	Sequence	NQFNSAIKI	NQFNSAIGKI	0.0338	-99.9	7.5203	903	YRFNGIGVT	YRFNGIGVT	YRFNGIGVT	0.0014	-99.9	7.0699	0.0585	0	3.598
359	NCVADYSVLY	Sequence	NVADYSVLY	NCVADYSVLY	0.0337	-99.9	7.5301	134	FCNDPFLGVYY	FCNDPGVYY	FCNDPFLGVYY	0.0013	-99.9	7.1066	0.0064	0	7.1066
297	ETKCTLKSF	Sequence	ETKCTLKSF	ETKCTLKSF	0.0337	-99.9	7.533	1194	ESLIDLQEL	ESLIDLQEL	ESLIDLQEL	0.0013	-99.9	7.114	0.0053	0	7.114
779	EVFAQVKQIY	Sequence	EVFQVKQIY	EVFAQVKQIY	0.0336	-99.9	7.5409	1223	LIAIVMVTI	LIAIVMVTI	LIAIVMVTI	0.0013	-99.9	7.136	0.0025	0	7.136
318	RVQPTESIV	Sequence	RVQPTESIV	RVQPTESIV	0.0335	-99.9	7.553	142	VYYHKNNKSW	VYYKNNKSW	VYYHKNNKSW	0.0013	-99.9	7.1581	0.0042	0	7.1581
820	LLFNKVTL	Sequence	LLF-NKVTL	LLFNKVTL	0.0333	-99.9	7.582	339	EVFNATRFA	EVFNATRFA	EVFNATRFA	0.0013	-99.9	7.1949	0.0017	0	7.1949
604	SNQVAVLY	Sequence	SNQ-VAVLY	SNQVAVLY	0.0332	-99.9	7.5921	92	ASTEKSNII	ASTEKSNII	ASTEKSNII	0.0013	-99.9	7.2059	0.0049	0	7.2059
96	KSNIIRGWIF	Sequence	KSNIIGWIF	KSNIIRGWIF	0.033	-99.9	7.6182	423	KLPDDFTGCV	KLPDDFTGV	KLPDDFTGCV	0.0013	-99.9	7.2169	0.0009	0	7.2169
477	TPCNGVEGF	Sequence	TPCNGVEGF	TPCNGVEGF	0.0327	-99.9	7.6547	350	YAWNRKRIS	YAWNRKRIS	YAWNRKRIS	0.0013	-99.9	7.2279	0.0043	0	7.2279
453	RLFRKSNLKPF	Sequence	RLFRKSNLF	RLFRKSNLKPF	0.0327	-99.9	7.6635	902	AYRFNGIGV	AYRFNGIGV	AYRFNGIGV	0.0013	-99.9	7.2353	0.0064	0	7.2353
562	QQFGRDIA	Sequence	QQFGRDIA-	QQFGRDIA	0.0326	-99.9	7.6687	913	NVLYENQKL	NVLYENQKL	NVLYENQKL	0.0013	-99.9	7.2574	0.0076	0	7.2574
947	LQDVVNQNA	Sequence	LQDVVNQNA	LQDVVNQNA	0.0324	-99.9	7.701	505	QPYRVVVLSF	QPYRVVVSF	QPYRVVVLSF	0.0013	-99.9	7.261	0.0104	0	7.261
240	LLALHRSYL	Sequence	LLALHRSYL	LLALHRSYL	0.0323	-99.9	7.7057	869	IAQYTSAL	IAQ-YTSAL	IAQYTSAL	0.0013	-99.9	7.3162	0.0041	0	7.3162
448	YNYLYRLF	Sequence	YNY-LYRLF	YNYLYRLF	0.0322	-99.9	7.7212	1203	GKYEQYIKW	GKYEQYIKW	GKYEQYIKW	0.0013	-99.9	7.3346	0.2356	1	0.8253
47	LHSTQDLFL	Sequence	LHSTQDLFL	LHSTQDLFL	0.0318	-99.9	7.7815	796	FGGFNFSQI	FGGFNFSQI	FGGFNFSQI	0.0013	-99.9	7.3346	0.0016	0	7.3346
853	KFNGLTVL	Sequence	K-FNGLTVL	KFNGLTVL	0.0317	-99.9	7.7904	262	AAYYVGYL	AAYYVG-YL	AAYYVGYL	0.0013	-99.9	7.3566	0.0073	0	7.3566
255	SGWTAGAAAYY	Sequence	SGWTAGAAY	SGWTAGAAAYY	0.0315	-99.9	7.8144	310	GIYQTSNFR	GIYQTSNFR	GIYQTSNFR	0.0013	-99.9	7.3676	0.0009	0	7.3676
772	EQDKNTQEV	Sequence	EQDKNTQEV	EQDKNTQEV	0.0315	-99.9	7.8171	134	FCNDPFLGV	FCNDPFLGV	FCNDPFLGV	0.0013	-99.9	7.375	0.002	0	7.375
370	SASFSTFKCY	Sequence	SAFSTFKCY	SASFSTFKCY	0.0313	-99.9	7.8413	287	AVDCALDPL	AVDCALDPL	AVDCALDPL	0.0013	-99.9	7.3787	0.0013	0	7.3787
1189	AKNLNESL	Sequence	AKN-LNESL	AKNLNESL	0.0312	-99.9	7.8554	909	GVTQNVLY	GVTQNVL-Y	GVTQNVLY	0.0013	-99.9	7.4081	0.013	0	7.4081
443	KVGGNYNYL	Sequence	KVGGNYNYL	KVGGNYNYL	0.0312	-99.9	7.8559	338	GEVFNATRF	GEVFNATRF	GEVFNATRF	0.0013	-99.9	7.4191	0.3611	1	0.2641
887	FGAGAALQI	Sequence	FGAGAALQI	FGAGAALQI	0.031	-99.9	7.8753	689	QSIIAYTM	QSI-IAYTM	QSIIAYTM	0.0013	-99.9	7.4449	0.0063	0	7.4449
1019	ASANLAATKM	Sequence	ASANAATKM	ASANLAATKM	0.031	-99.9	7.8792	229	PIGINITRF	PIGINITRF	PIGINITRF	0.0013	-99.9	7.4449	0.0032	0	7.4449
1218	GFIAGLIAI	Sequence	GFIAGLIAI	GFIAGLIAI	0.0308	-99.9	7.9014	1167	DISGINASV	DISGINASV	DISGINASV	0.0012	-99.9	7.4743	0.0016	0	7.4743
298	TKCTLKSF	Sequence	TKC-TLKSF	TKCTLKSF	0.0308	-99.9	7.9048	537	CVNFNFNGL	CVNFNFNGL	CVNFNFNGL	0.0012	-99.9	7.4963	0.0018	0	7.4963
876	LLAGTITSGW	Sequence	LLAGTITSW	LLAGTITSGW	0.0306	-99.9	7.9323	9	LVSSQCVNL	LVSSQCVNL	LVSSQCVNL	0.0012	-99.9	7.5124	0.0022	0	7.5124
27	YTNSFTRGVYY	Sequence	YSFTRGVYY	YTNSFTRGVYY	0.0305	-99.9	7.9468	596	VITPGTNTS	VITPGTNTS	VITPGTNTS	0.0012	-99.9	7.5372	0.0017	0	7.5372
1155	FKNHTSPDV	Sequence	FKNHTSPDV	FKNHTSPDV	0.0304	-99.9	7.9559	968	NFGAISSVL	NFGAISSVL	NFGAISSVL	0.0012	-99.9	7.5455	0.0063	0	7.5455
1059	VVFLHVTYV	Sequence	VVFLHVTYV	VVFLHVTYV	0.0303	-99.9	7.9741	971	AISSVLNDI	AISSVLNDI	AISSVLNDI	0.0012	-99.9	7.5579	0.0025	0	7.5579
48	HSTQDLFLPF	Sequence	HSQDLFLPF	HSTQDLFLPF	0.0299	-99.9	8.0239	312	YQTSNFRVQ	YQTSNFRVQ	YQTSNFRVQ	0.0012	-99.9	7.5785	0.058	0	3.6191
1036	SKRVDFCGKGY	Sequence	SKRVDGKGY	SKRVDFCGKGY	0.0297	-99.9	8.0473	867	EMIAQYTSA	EMIAQYTSA	EMIAQYTSA	0.0012	-99.9	7.5868	0.0126	0	7.5868
820	LLFNKVTLA	Sequence	LLFNKVTLA	LLFNKVTLA	0.0296	-99.9	8.0671	1065	TYVPAQEKNF	TYVPAQKNF	TYVPAQEKNF	0.0012	-99.9	7.6281	0.008	0	7.6281
19	TRTQLPPAYT	Sequence	TRTQLPPAY	TRTQLPPAY	0.0294	-99.9	8.0947	34	GVYYPDKVFR	GVYPDKVFR	GVYYPDKVFR	0.0012	-99.9	7.6405	0.0069	0	7.6405
268	YLQPRTFLLKY	Sequence	YLQPRTLKY	YLQPRTFLLKY	0.0294	-99.9	8.0986	266	VGYLQPRTFL	VGYQPRTFL	VGYLQPRTFL	0.0012	-99.9	7.6488	0.0054	0	7.6488
1174	SVVNIQKEI	Sequence	SVVNIQKEI	SVVNIQKEI	0.0293	-99.9	8.1055	955	AQALNTLVK	AQALNTLVK	AQALNTLVK	0.0012	-99.9	7.6901	0.045	0	4.2634
42	FRSSVLHST	Sequence	FRSSVLHST	FRSSVLHST	0.0292	-99.9	8.1164	207	TPINLVRDL	TPINLVRDL	TPINLVRDL	0.0012	-99.9	7.7521	0.0037	0	7.7521
844	AARDLICAQKF	Sequence	AARDLIQKF	AARDLICAQKF	0.0291	-99.9	8.1297	1114	ITTDNTFVS	ITTDNTFVS	ITTDNTFVS	0.0012	-99.9	7.7893	0.0009	0	7.7893
924	NQFNSAIGK	Sequence	NQFNSAIGK	NQFNSAIGK	0.0291	-99.9	8.1372	907	GIGVTQNVL	GIGVTQNVL	GIGVTQNVL	0.0012	-99.9	7.8017	0.0052	0	7.8017
1195	SLIDLQEL	Sequence	SLIDL-QEL	SLIDLQEL	0.0291	-99.9	8.1381	1187	EVAKNLNESL	EVAKNLNSL	EVAKNLNESL	0.0012	-99.9	7.814	0.001	0	7.814
1195	SLIDLQELGKY	Sequence	SLIDELGKY	SLIDLQELGKY	0.0291	-99.9	8.1418	496	FQPTNGVGYQ	FQPTNGVGY	FQPTNGVGY	0.0012	-99.9	7.8223	0.0361	0	4.9293
893	LQIPFAMQ	Sequence	LQIPFAMQ-	LQIPFAMQ	0.0286	-99.9	8.2105	574	AVRDPQTLE	AVRDPQTLE	AVRDPQTLE	0.0012	-99.9	7.8264	0.002	0	7.8264
760	TQLNRALTGI	Sequence	TQLNRALTI	TQLNRALTGI	0.0284	-99.9	8.2332	157	RVYSSANNC	RVYSSANNC	RVYSSANNC	0.0012	-99.9	7.8554	0.0072	0	7.8554
412	GQTGKIADYN	Sequence	GQTGKIADY	GQTGKIADY	0.0284	-99.9	8.2398	258	TAGAAAYYV	TAGAAAYYV	TAGAAAYYV	0.0011	-99.9	7.876	0.0018	0	7.876
255	SGWTAGAAA	Sequence	SGWTAGAAA	SGWTAGAAA	0.0283	-99.9	8.2463	825	VTLADAGFI	VTLADAGFI	VTLADAGFI	0.0011	-99.9	7.9091	0.0021	0	7.9091
181	KQGNFKNL	Sequence	KQ-GNFKNL	KQGNFKNL	0.0279	-99.9	8.3086	255	SGWTAGAAA	SGWTAGAAA	SGWTAGAAA	0.0011	-99.9	7.9132	0.0147	0	7.9132
914	VLYENQKL	Sequence	VLY-ENQKL	VLYENQKL	0.0278	-99.9	8.3159	174	FLMDLEGKQ	FLMDLEGKQ	FLMDLEGKQ	0.0011	-99.9	7.9215	0.0015	0	7.9215
892	ALQIPFAM	Sequence	ALQ-IPFAM	ALQIPFAM	0.0275	-99.9	8.3674	764	RALTGIAVE	RALTGIAVE	RALTGIAVE	0.0011	-99.9	7.9256	0.0072	0	7.9256
764	RALTGIAV	Sequence	RAL-TGIAV	RALTGIAV	0.0274	-99.9	8.3707	980	LSRLDKVEA	LSRLDKVEA	LSRLDKVEA	0.0011	-99.9	7.9256	0.0023	0	7.9256
69	VSGTNGTKRF	Sequence	VSGTNGTKF	VSGTNGTKRF	0.0273	-99.9	8.3851	1100	HWFVTQRNFY	HWFTQRNFY	HWFVTQRNFY	0.0011	-99.9	7.938	0.0058	0	7.938
1180	KEIDRLNEVA	Sequence	KEIDRLNVA	KEIDRLNEVA	0.0272	-99.9	8.4097	938	SSTASALGKL	STASALGKL	SSTASALGKL	0.0011	-99.9	7.938	0.0011	0	7.938
160	SSANNCTF	Sequence	SSA-NNCTF	SSANNCTF	0.0272	-99.9	8.4111	793	IKDFGGFNF	IKDFGGFNF	IKDFGGFNF	0.0011	-99.9	7.9504	0.3626	1	0.2588
988	AEVQIDRL	Sequence	AEVQID-RL	AEVQIDRL	0.027	-99.9	8.4341	383	PTKLNDLCF	PTKLNDLCF	PTKLNDLCF	0.0011	-99.9	7.9669	0.0025	0	7.9669
1260	SEPVLKGVKL	Sequence	SEVLKGVKL	SEPVLKGVKL	0.027	-99.9	8.4404	304	SFTVEKGIY	SFTVEKGIY	SFTVEKGIY	0.0011	-99.9	8.0057	0.0179	0	7.43
628	LTPTWRVY	Sequence	LT-PTWRVY	LTPTWRVY	0.0269	-99.9	8.4455	341	FNATRFASV	FNATRFASV	FNATRFASV	0.0011	-99.9	8.0057	0.0097	0	8.0057
345	RFASVYAW	Sequence	#NAME?	RFASVYAW	0.0267	-99.9	8.4767	125	VVIKVCEFQF	VVIKVEFQF	VVIKVCEFQF	0.0011	-99.9	8.0115	0.0075	0	8.0115
504	YQPYRVVV	Sequence	YQ-PYRVVV	YQPYRVVV	0.0267	-99.9	8.4809	205	KHTPINLVR	KHTPINLVR	KHTPINLVR	0.0011	-99.9	8.0287	0.0095	0	8.0287
354	RKRISNCVA	Sequence	RKRISNCVA	RKRISNCVA	0.0263	-99.9	8.5387	531	NLVKNKCVNF	NLVKNKVNF	NLVKNKCVNF	0.0011	-99.9	8.0632	0.0053	0	8.0632
40	KVFRSSVLH	Sequence	KVFRSSVLH	KVFRSSVLH	0.0261	-99.9	8.5704	203	YSKHTPINLV	YSKHPINLV	YSKHTPINLV	0.0011	-99.9	8.0805	0.0049	0	8.0805
582	EILDITPCSF	Sequence	EILDITPSF	EILDITPCSF	0.026	-99.9	8.5947	345	RFASVYAW	RFA-SVYAW	RFASVYAW	0.0011	-99.9	8.0977	0.0139	0	8.0977
192	VFKNIDGY	Sequence	V-FKNIDGY	VFKNIDGY	0.0259	-99.9	8.605	623	IHADQLTPTW	IADQLTPTW	IHADQLTPTW	0.0011	-99.9	8.1494	0.0385	0	4.7189
834	KQYGDCLGDI	Sequence	KQYGDCLGI	KQYGDCLGDI	0.0259	-99.9	8.606	35	VYYPDKVFR	VYYPDKVFR	VYYPDKVFR	0.0011	-99.9	8.1954	0.0043	0	8.1954
514	FELLHAPAT	Sequence	FELLHAPAT	FELLHAPAT	0.0258	-99.9	8.6213	303	KSFTVEKGI	KSFTVEKGI	KSFTVEKGI	0.0011	-99.9	8.2011	0.0075	0	8.2011
705	AYSNNSIAI	Sequence	AYSNNSIAI	AYSNNSIAI	0.0258	-99.9	8.6328	399	FVIRGDEV	FVI-RGDEV	FVIRGDEV	0.0011	-99.9	8.2011	0.0009	0	8.2011
149	KSWMESEFRVY	Sequence	KSWSEFRVY	KSWMESEFRVY	0.0256	-99.9	8.666	233	NITRFQTLL	NITRFQTLL	NITRFQTLL	0.0011	-99.9	8.2299	0.0012	0	8.2299
792	PIKDFGGFNF	Sequence	IKDFGGFNF	IKDFGGFNF	0.0256	-99.9	8.6704	515	ELLHAPATV	ELLHAPATV	ELLHAPATV	0.0011	-99.9	8.2414	0.0054	0	8.2414
899	MQMAYRFNGI	Sequence	MQMAYFNGI	MQMAYRFNGI	0.0252	-99.9	8.7433	1127	VVIGIVNNTV	VVIGIVNTV	VVIGIVNNTV	0.0011	-99.9	8.2644	0.0023	0	8.2644
497	QPTNGVGY	Sequence	#NAME?	QPTNGVGY	0.0249	-99.9	8.7801	149	KSWMESEF	KSW-MESEF	KSWMESEF	0.0011	-99.9	8.3161	0.0291	0	5.6288
491	LQSYGFQPT	Sequence	LQSYGFQPT	LQSYGFQPT	0.0248	-99.9	8.8099	197	DGYFKIYSK	DGYFKIYSK	DGYFKIYSK	0.0011	-99.9	8.3218	0.0011	0	8.3218
168	EYVSQPFLM	Sequence	EYVSQPFLM	EYVSQPFLM	0.0247	-99.9	8.8179	1139	PLQPELDSF	PLQPELDSF	PLQPELDSF	0.0011	-99.9	8.3276	0.0213	0	6.7262
723	TEILPVSMTK	Sequence	TEIPVSMTK	TEILPVSMTK	0.0247	-99.9	8.8232	1033	LGQSKRVDF	LGQSKRVDF	LGQSKRVDF	0.0011	-99.9	8.3448	0.0233	0	6.3828
909	GVTQNVLY	Sequence	GVTQN-VLY	GVTQNVLY	0.0247	-99.9	8.8278	682	RARSVASQS	RARSVASQS	RARSVASQS	0.0011	-99.9	8.3908	0.0051	0	8.3908
39	DKVFRSSVL	Sequence	DKVFRSSVL	DKVFRSSVL	0.0245	-99.9	8.8651	858	TVLPPLLTDEM	TVLPPLLTM	TVLPPLLTDEM	0.001	-99.9	8.3966	0.0023	0	8.3966
45	SVLHSTQDL	Sequence	SVLHSTQDL	SVLHSTQDL	0.0244	-99.9	8.8794	159	YSSANNCTFE	YSSANNCTF	YSSANNCTF	0.001	-99.9	8.408	0.0014	0	8.408
999	RLQSLQTYV	Sequence	RLQSLQTYV	RLQSLQTYV	0.0243	-99.9	8.9004	1111	PQIITTDNTF	QIITTDNTF	QIITTDNTF	0.001	-99.9	8.4138	0.0581	0	3.609
1099	THWFVTQRNFY	Sequence	THWTQRNFY	THWFVTQRNFY	0.0241	-99.9	8.9229	1014	AAEIRASANL	AAIRASANL	AAEIRASANL	0.001	-99.9	8.4253	0.0202	0	6.9446
867	EMIAQYTSA	Sequence	EMIAQYTSA	EMIAQYTSA	0.0239	-99.9	8.9635	1120	FVSGNCDVVI	FVSGNDVVI	FVSGNCDVVI	0.001	-99.9	8.4425	0.0012	0	8.4425
217	QGFSALEPL	Sequence	QGFSALEPL	QGFSALEPL	0.0238	-99.9	8.9819	870	AQYTSALL	AQY-TSALL	AQYTSALL	0.001	-99.9	8.4483	0.177	1	1.1977
916	YENQKLIAN	Sequence	YENQKLIAN	YENQKLIAN	0.0232	-99.9	9.0967	194	KNIDGYFKIY	KNIDGYFIY	KNIDGYFKIY	0.001	-99.9	8.477	0.1684	1	1.2786
55	LPFFSNVTWF	Sequence	LPFFSNVTF	LPFFSNVTWF	0.0231	-99.9	9.1162	844	AARDLICAQKF	AARDLIQKF	AARDLICAQKF	0.001	-99.9	8.4885	0.0151	0	8.1297
1135	TVYDPLQPEL	Sequence	TVYDPLQEL	TVYDPLQPEL	0.0231	-99.9	9.1201	906	NGIGVTQNVLY	NGIGVTVLY	NGIGVTQNVLY	0.001	-99.9	8.4885	0.003	0	8.4885
236	RFQTLLAL	Sequence	R-FQTLLAL	RFQTLLAL	0.0231	-99.9	9.1238	126	VIKVCEFQF	VIKVCEFQF	VIKVCEFQF	0.001	-99.9	8.4943	0.0092	0	8.4943
487	CYFPLQSY	Sequence	CYF-PLQSY	CYFPLQSY	0.0231	-99.9	9.1251	185	FKNLREFVF	FKNLREFVF	FKNLREFVF	0.001	-99.9	8.5361	0.2603	1	0.6949
602	NTSNQVAVL	Sequence	NTSNQVAVL	NTSNQVAVL	0.0229	-99.9	9.1585	802	SQILPDPSK	SQILPDPSK	SQILPDPSK	0.001	-99.9	8.5722	0.0484	0	4.0543
190	EFVFKNIDGY	Sequence	FVFKNIDGY	FVFKNIDGY	0.0228	-99.9	9.1792	885	WTFGAGAA	WTFGAGAA-	WTFGAGAA	0.001	-99.9	8.5825	0.0012	0	8.5825
1147	FKEELDKY	Sequence	FKEELD-KY	FKEELDKY	0.0226	-99.9	9.2208	253	SSSGWTAGA	SSSGWTAGA	SSSGWTAGA	0.001	-99.9	8.5876	0.0015	0	8.5876
696	MSLGAENSV	Sequence	MSLGAENSV	MSLGAENSV	0.0224	-99.9	9.2557	828	ADAGFIKQY	ADAGFIKQY	ADAGFIKQY	0.001	-99.9	8.5928	0.2468	1	0.7654
439	NLDSKVGGNY	Sequence	NLSKVGGNY	NLDSKVGGNY	0.0224	-99.9	9.2569	1128	VIGIVNNTV	VIGIVNNTV	VIGIVNNTV	0.001	-99.9	8.5928	0.0048	0	8.5928
626	DQLTPTWRV	Sequence	DQLTPTWRV	DQLTPTWRV	0.0224	-99.9	9.2613	1108	FYEPQIITT	FYEPQIITT	FYEPQIITT	0.001	-99.9	8.6082	0.0047	0	8.6082
964	QLSSNFGAI	Sequence	QLSSNFGAI	QLSSNFGAI	0.0222	-99.9	9.2941	18	TTRTQLPPA	TTRTQLPPA	TTRTQLPPA	0.001	-99.9	8.6443	0.0015	0	8.6443
852	QKFNGLTVLP	Sequence	QKFNGLTVL	QKFNGLTVL	0.0222	-99.9	9.2981	217	QGFSALEPL	QGFSALEPL	QGFSALEPL	0.001	-99.9	8.6649	0.0124	0	8.6649
928	SAIGKIQDSL	Sequence	SAIGKIQSL	SAIGKIQDSL	0.022	-99.9	9.3227	557	KFLPFQQF	KFLP-FQQF	KFLPFQQF	0.001	-99.9	8.6856	0.0503	0	3.9541
74	GTKRFDNPVL	Sequence	GKRFDNPVL	GTKRFDNPVL	0.022	-99.9	9.334	880	TITSGWTF	TIT-SGWTF	TITSGWTF	0.001	-99.9	8.6856	0.0098	0	8.6856
1255	FDEDDSEPVL	Sequence	FEDDSEPVL	FDEDDSEPVL	0.022	-99.9	9.3371	990	VQIDRLITG	VQIDRLITG	VQIDRLITG	0.001	-99.9	8.7371	0.1645	1	1.3163
1104	TQRNFYEPQ	Sequence	TQRNFYEPQ	TQRNFYEPQ	0.022	-99.9	9.3398	886	TFGAGAAL	#NAME?	TFGAGAAL	0.001	-99.9	8.7371	0.0061	0	8.7371
753	LQYGSFCT	Sequence	LQYGSFCT-	LQYGSFCT	0.0219	-99.9	9.3592	717	FTISVTTE	FTISVTTE-	FTISVTTE	0.001	-99.9	8.7629	0.0009	0	8.7629
312	YQTSNFRV	Sequence	YQTSNFRV-	YQTSNFRV	0.0218	-99.9	9.3758	202	IYSKHTPINL	ISKHTPINL	IYSKHTPINL	0.001	-99.9	8.7732	0.0022	0	8.7732
994	RLITGRLQS	Sequence	RLITGRLQS	RLITGRLQS	0.0217	-99.9	9.3847	1092	GVFVSNGTHWF	GVFNGTHWF	GVFVSNGTHWF	0.001	-99.9	8.7887	0.0056	0	8.7887
802	SQILPDPS	Sequence	SQILPDPS-	SQILPDPS	0.0216	-99.9	9.4029	118	IVNNATNVVI	IVNNATNVI	IVNNATNVVI	0.001	-99.9	8.799	0.0024	0	8.799
704	VAYSNNSI	Sequence	VAYSN-NSI	VAYSNNSI	0.0216	-99.9	9.413	758	FCTQLNRAL	FCTQLNRAL	FCTQLNRAL	0.001	-99.9	8.8196	0.0018	0	8.8196
682	RARSVASQSI	Sequence	RRSVASQSI	RARSVASQSI	0.0215	-99.9	9.4188	464	ERDISTEIY	ERDISTEIY	ERDISTEIY	0.001	-99.9	8.8351	0.162	1	1.3411
109	LDSKTQSLL	Sequence	LDSKTQSLL	LDSKTQSLL	0.0215	-99.9	9.4328	635	YSTGSNVFQ	YSTGSNVFQ	YSTGSNVFQ	0.001	-99.9	8.8351	0.0007	0	8.8351
1256	DEDDSEPVL	Sequence	DEDDSEPVL	DEDDSEPVL	0.0214	-99.9	9.4479	815	SFIEDLLF	SFIED-LLF	SFIEDLLF	0.001	-99.9	8.8763	0.02	0	6.9688
704	VAYSNNSIAI	Sequence	VAYNNSIAI	VAYSNNSIAI	0.0214	-99.9	9.4564	1004	QTYVTQQL	QTY-VTQQL	QTYVTQQL	0.001	-99.9	8.8969	0.0044	0	8.8969
506	PYRVVVLSF	Sequence	PYRVVVLSF	PYRVVVLSF	0.0213	-99.9	9.4572	267	GYLQPRTFLL	GYLQPRTFL	GYLQPRTFLL	0.001	-99.9	8.8969	0.0018	0	8.8969
554	SNKKFLPF	Sequence	SNKK-FLPF	SNKKFLPF	0.0213	-99.9	9.4729	1095	VSNGTHWF	VSNGT-HWF	VSNGTHWF	0.001	-99.9	8.9072	0.009	0	8.9072
1202	LGKYEQYIKW	Sequence	LKYEQYIKW	LGKYEQYIKW	0.0209	-99.9	9.5563	318	RVQPTESIVR	RVQPTSIVR	RVQPTESIVR	0.001	-99.9	8.9072	0.0014	0	8.9072
1209	IKWPWYIWLGF	Sequence	IKWPWYLGF	IKWPWYIWLGF	0.0207	-99.9	9.5948	888	GAGAALQIPF	GAAALQIPF	GAGAALQIPF	0.001	-99.9	8.9175	0.0103	0	8.9175
1087	HFPREGVF	Sequence	H-FPREGVF	HFPREGVF	0.0207	-99.9	9.6084	1013	RAAEIRASANL	RAAEIRASL	RAAEIRASANL	0.001	-99.9	8.9175	0.0053	0	8.9175
482	VEGFNCYF	Sequence	VE-GFNCYF	VEGFNCYF	0.0206	-99.9	9.6308	731	TKTSVDCTMY	TTSVDCTMY	TKTSVDCTMY	0.0009	-99.9	8.9381	0.0535	0	3.8089
907	GIGVTQNVLY	Sequence	GIVTQNVLY	GIGVTQNVLY	0.0206	-99.9	9.6313	551	LTESNKKFL	LTESNKKFL	LTESNKKFL	0.0009	-99.9	8.9433	0.0013	0	8.9433
1032	VLGQSKRVDF	Sequence	VLGQSKRVF	VLGQSKRVDF	0.0205	-99.9	9.6463	716	NFTISVTTEI	NTISVTTEI	NFTISVTTEI	0.0009	-99.9	8.9691	0.0007	0	8.9691
1215	IWLGFIAGL	Sequence	IWLGFIAGL	IWLGFIAGL	0.0204	-99.9	9.6654	1211	WPWYIWLGF	WPWYIWLGF	WPWYIWLGF	0.0009	-99.9	9	0.0071	0	9
186	KNLREFVF	Sequence	KNLREF-VF	KNLREFVF	0.0204	-99.9	9.6717	480	NGVEGFNCYF	NGVEGFNYF	NGVEGFNCYF	0.0009	-99.9	9	0.0071	0	9
875	ALLAGTITS	Sequence	ALLAGTITS	ALLAGTITS	0.0204	-99.9	9.6719	1015	AEIRASANL	AEIRASANL	AEIRASANL	0.0009	-99.9	9.0329	0.2288	1	0.8607
581	LEILDITPC	Sequence	LEILDITPC	LEILDITPC	0.0203	-99.9	9.6945	1017	IRASANLAA	IRASANLAA	IRASANLAA	0.0009	-99.9	9.0395	0.1024	0	2.288
1052	PQSAPHGVV	Sequence	PQSAPHGVV	PQSAPHGVV	0.0203	-99.9	9.6968	461	KPFERDIST	KPFERDIST	KPFERDIST	0.0009	-99.9	9.0395	0.0053	0	9.0395
707	SNNSIAIPTNF	Sequence	SNIAIPTNF	SNNSIAIPTNF	0.0202	-99.9	9.7086	876	LLAGTITSG	LLAGTITSG	LLAGTITSG	0.0009	-99.9	9.0526	0.007	0	9.0526
688	SQSIIAYTMS	Sequence	SQSIIAYTM	SQSIIAYTM	0.0202	-99.9	9.7093	407	RQIAPGQTG	RQIAPGQTG	RQIAPGQTG	0.0009	-99.9	9.0592	0.2906	1	0.5365
317	FRVQPTESIV	Sequence	FRVQPTESV	FRVQPTESIV	0.0202	-99.9	9.7111	733	TSVDCTMY	TSVDCTM-Y	TSVDCTMY	0.0009	-99.9	9.0658	0.0079	0	9.0658
152	MESEFRVYS	Sequence	MESEFRVYS	MESEFRVYS	0.02	-99.9	9.7536	209	INLVRDLPQGF	IVRDLPQGF	INLVRDLPQGF	0.0009	-99.9	9.0724	0.0066	0	9.0724
319	VQPTESIVR	Sequence	VQPTESIVR	VQPTESIVR	0.02	-99.9	9.7543	264	YYVGYLQPRTF	YYVGQPRTF	YYVGYLQPRTF	0.0009	-99.9	9.0855	0.0101	0	9.0855
463	FERDISTE	Sequence	FERDISTE-	FERDISTE	0.0199	-99.9	9.7736	689	QSIIAYTMSL	QSIIATMSL	QSIIAYTMSL	0.0009	-99.9	9.1118	0.0023	0	9.1118
888	GAGAALQIPF	Sequence	GAAALQIPF	GAGAALQIPF	0.0196	-99.9	9.8415	1146	SFKEELDKYF	SFKELDKYF	SFKEELDKYF	0.0009	-99.9	9.125	0.0178	0	7.4203
326	VRFPNITN	Sequence	VRFPNITN-	VRFPNITN	0.0196	-99.9	9.8602	633	RVYSTGSNVFQ	RVYSTGSVF	RVYSTGSNVF	0.0009	-99.9	9.125	0.0102	0	9.125
633	RVYSTGSNVFQ	Sequence	RVYSTGNVF	RVYSTGSNVF	0.0195	-99.9	9.8699	57	FFSNVTWFH	FFSNVTWFH	FFSNVTWFH	0.0009	-99.9	9.125	0.0014	0	9.125
505	QPYRVVVLSF	Sequence	QPYRVVLSF	QPYRVVVLSF	0.0195	-99.9	9.8736	924	NQFNSAIGK	NQFNSAIGK	NQFNSAIGK	0.0009	-99.9	9.1316	0.015	0	8.1372
817	IEDLLFNKV	Sequence	IEDLLFNKV	IEDLLFNKV	0.0195	-99.9	9.8745	365	SVLYNSASFS	SVLYNSASF	SVLYNSASF	0.0009	-99.9	9.1382	0.0024	0	9.1382
850	CAQKFNGLTV	Sequence	AQKFNGLTV	AQKFNGLTV	0.0194	-99.9	9.8992	194	KNIDGYFKI	KNIDGYFKI	KNIDGYFKI	0.0009	-99.9	9.1579	0.0883	0	2.6163
981	SRLDKVEAEV	Sequence	SRLDKVEAV	SRLDKVEAEV	0.0193	-99.9	9.9135	761	QLNRALTGI	QLNRALTGI	QLNRALTGI	0.0009	-99.9	9.1645	0.0034	0	9.1645
264	YYVGYLQPRTF	Sequence	YGYLQPRTF	YYVGYLQPRTF	0.0193	-99.9	9.9211	446	GNYNYLYRL	GNYNYLYRL	GNYNYLYRL	0.0009	-99.9	9.1776	0.0352	0	4.995
602	NTSNQVAVLY	Sequence	NTSNQVAVY	NTSNQVAVLY	0.0193	-99.9	9.9262	364	YSVLYNSAS	YSVLYNSAS	YSVLYNSAS	0.0009	-99.9	9.1842	0.0017	0	9.1842
584	LDITPCSF	Sequence	LDI-TPCSF	LDITPCSF	0.0193	-99.9	9.9322	507	YRVVVLSF	YRV-VVLSF	YRVVVLSF	0.0009	-99.9	9.2171	0.1583	1	1.3786
812	SKRSFIEDLL	Sequence	SKRSFIDLL	SKRSFIEDLL	0.019	-99.9	9.9922	277	KYNENGTIT	KYNENGTIT	KYNENGTIT	0.0009	-99.9	9.2434	0.0034	0	9.2434
170	VSQPFLMDL	Sequence	VSQPFLMDL	VSQPFLMDL	0.0187	-99.9	10.062	234	ITRFQTLL	ITR-FQTLL	ITRFQTLL	0.0009	-99.9	9.2434	0.001	0	9.2434
1054	SAPHGVVFL	Sequence	SAPHGVVFL	SAPHGVVFL	0.0187	-99.9	10.0705	703	SVAYSNNSIA	SAYSNNSIA	SVAYSNNSIA	0.0009	-99.9	9.25	0.0016	0	9.25
279	NENGTITDA	Sequence	NENGTITDA	NENGTITDA	0.0186	-99.9	10.0986	827	LADAGFIKQ	LADAGFIKQ	LADAGFIKQ	0.0009	-99.9	9.2632	0.002	0	9.2632
749	SNLLLQYGSF	Sequence	SNLLLQYSF	SNLLLQYGSF	0.0186	-99.9	10.102	225	LVDLPIGINI	LVDPIGINI	LVDLPIGINI	0.0009	-99.9	9.2829	0.0016	0	9.2829
880	TITSGWTF	Sequence	T-ITSGWTF	TITSGWTF	0.0186	-99.9	10.1056	867	EMIAQYTSAL	MIAQYTSAL	MIAQYTSAL	0.0009	-99.9	9.3026	0.0036	0	9.3026
890	GAALQIPFAM	Sequence	GAAQIPFAM	GAALQIPFAM	0.0186	-99.9	10.1133	382	SPTKLNDLCF	STKLNDLCF	SPTKLNDLCF	0.0009	-99.9	9.3092	0.0022	0	9.3092
834	KQYGDCLGDIA	Sequence	KQYGDGDIA	KQYGDCLGDIA	0.0184	-99.9	10.1665	15	VNLTTRTQL	VNLTTRTQL	VNLTTRTQL	0.0009	-99.9	9.3158	0.0361	0	4.9176
341	FNATRFASV	Sequence	FNATRFASV	FNATRFASV	0.0184	-99.9	10.1677	621	VAIHADQL	VAI-HADQL	VAIHADQL	0.0009	-99.9	9.3158	0.0031	0	9.3158
516	LLHAPATVC	Sequence	LLHAPATVC	LLHAPATVC	0.0183	-99.9	10.1917	603	TSNQVAVLYQ	TSNQVAVLY	TSNQVAVLY	0.0009	-99.9	9.3421	0.0021	0	9.3421
819	DLLFNKVTL	Sequence	DLLFNKVTL	DLLFNKVTL	0.0182	-99.9	10.2215	574	AVRDPQTLEIL	AVRDPQTLL	AVRDPQTLEIL	0.0009	-99.9	9.3618	0.0017	0	9.3618
1191	NLNESLIDL	Sequence	NLNESLIDL	NLNESLIDL	0.018	-99.9	10.2617	407	RQIAPGQTGK	RQIAPGTGK	RQIAPGQTGK	0.0009	-99.9	9.375	0.0439	0	4.3225
877	LAGTITSGW	Sequence	LAGTITSGW	LAGTITSGW	0.018	-99.9	10.2662	57	FFSNVTWF	F-FSNVTWF	FFSNVTWF	0.0009	-99.9	9.3882	0.0037	0	9.3882
692	IAYTMSLGA	Sequence	IAYTMSLGA	IAYTMSLGA	0.018	-99.9	10.2775	1261	EPVLKGVKL	EPVLKGVKL	EPVLKGVKL	0.0009	-99.9	9.3882	0.0031	0	9.3882
127	IKVCEFQF	Sequence	IKVCE-FQF	IKVCEFQF	0.0179	-99.9	10.2886	872	YTSALLAGTI	YTSALLATI	YTSALLAGTI	0.0009	-99.9	9.4145	0.0007	0	9.4145
1000	LQSLQTYVT	Sequence	LQSLQTYVT	LQSLQTYVT	0.0179	-99.9	10.2889	32	TRGVYYPDKVF	TVYYPDKVF	TRGVYYPDKVF	0.0009	-99.9	9.4342	0.0623	0	3.4341
1105	QRNFYEPQII	Sequence	QRFYEPQII	QRNFYEPQII	0.0179	-99.9	10.2928	442	SKVGGNYNYL	SVGGNYNYL	SKVGGNYNYL	0.0009	-99.9	9.4803	0.0725	0	3.0651
205	KHTPINLVR	Sequence	KHTPINLVR	KHTPINLVR	0.0178	-99.9	10.3226	786	QIYKTPPIK	QIYKTPPIK	QIYKTPPIK	0.0009	-99.9	9.4868	0.0015	0	9.4868
723	TEILPVSMT	Sequence	TEILPVSMT	TEILPVSMT	0.0178	-99.9	10.3268	167	FEYVSQPFLM	FEYSQPFLM	FEYVSQPFLM	0.0009	-99.9	9.5	0.0494	0	3.9889
995	LITGRLQSL	Sequence	LITGRLQSL	LITGRLQSL	0.0178	-99.9	10.3339	1113	IITTDNTFV	IITTDNTFV	IITTDNTFV	0.0009	-99.9	9.5147	0.0014	0	9.5147
1225	AIVMVTIML	Sequence	AIVMVTIML	AIVMVTIML	0.0178	-99.9	10.3353	879	GTITSGWTFG	GTITSGWTF	GTITSGWTF	0.0008	-99.9	9.5809	0.0031	0	9.5809
850	CAQKFNGLTVL	Sequence	AQFNGLTVL	AQKFNGLTVL	0.0178	-99.9	10.3373	891	AALQIPFAMQM	AAIPFAMQM	AALQIPFAMQM	0.0008	-99.9	9.5956	0.0779	0	2.9007
982	RLDKVEAEV	Sequence	RLDKVEAEV	RLDKVEAEV	0.0176	-99.9	10.3945	604	SNQVAVLY	S-NQVAVLY	SNQVAVLY	0.0008	-99.9	9.5956	0.017	0	7.5921
83	LPFNDGVYFA	Sequence	LPFNDGVYF	LPFNDGVYF	0.0175	-99.9	10.4007	856	GLTVLPPLL	GLTVLPPLL	GLTVLPPLL	0.0008	-99.9	9.5956	0.0056	0	9.5956
1042	CGKGYHLMSF	Sequence	CKGYHLMSF	CGKGYHLMSF	0.0174	-99.9	10.4373	328	FPNITNLCPF	FPITNLCPF	FPNITNLCPF	0.0008	-99.9	9.6103	0.0084	0	9.6103
673	YQTQTNSPR	Sequence	YQTQTNSPR	YQTQTNSPR	0.0174	-99.9	10.4441	753	LQYGSFCTQL	LQYGSFTQL	LQYGSFCTQL	0.0008	-99.9	9.6176	0.1055	0	2.2216
126	VIKVCEFQF	Sequence	VIKVCEFQF	VIKVCEFQF	0.0174	-99.9	10.4455	694	YTMSLGAE	YTMSLGAE-	YTMSLGAE	0.0008	-99.9	9.6176	0.0009	0	9.6176
869	IAQYTSALLA	Sequence	IQYTSALLA	IAQYTSALLA	0.0173	-99.9	10.4602	566	RDIADTTDAV	RIADTTDAV	RDIADTTDAV	0.0008	-99.9	9.6618	0.0049	0	9.6618
235	TRFQTLLALH	Sequence	TRFQTLLAH	TRFQTLLALH	0.0173	-99.9	10.4611	973	SSVLNDILSRL	SSNDILSRL	SSVLNDILSRL	0.0008	-99.9	9.7279	0.0007	0	9.7279
929	AIGKIQDSL	Sequence	AIGKIQDSL	AIGKIQDSL	0.0173	-99.9	10.4766	938	SSTASALGK	SSTASALGK	SSTASALGK	0.0008	-99.9	9.7426	0.0006	0	9.7426
1051	FPQSAPHGVV	Sequence	FQSAPHGVV	FPQSAPHGVV	0.0173	-99.9	10.4798	595	SVITPGTNTS	SVIPGTNTS	SVITPGTNTS	0.0008	-99.9	9.7721	0.001	0	9.7721
308	EKGIYQTSNF	Sequence	EKIYQTSNF	EKGIYQTSNF	0.0172	-99.9	10.488	1177	NIQKEIDRL	NIQKEIDRL	NIQKEIDRL	0.0008	-99.9	9.7868	0.002	0	9.7868
358	SNCVADYSVLY	Sequence	SVADYSVLY	SNCVADYSVLY	0.0171	-99.9	10.5282	1106	RNFYEPQII	RNFYEPQII	RNFYEPQII	0.0008	-99.9	9.7941	0.0894	0	2.585
1095	VSNGTHWF	Sequence	VSN-GTHWF	VSNGTHWF	0.017	-99.9	10.5675	877	LAGTITSGWTF	LTITSGWTF	LAGTITSGWTF	0.0008	-99.9	9.8015	0.0041	0	9.8015
1163	VDLGDISGI	Sequence	VDLGDISGI	VDLGDISGI	0.0169	-99.9	10.5718	671	ASYQTQTNS	ASYQTQTNS	ASYQTQTNS	0.0008	-99.9	9.8015	0.0021	0	9.8015
344	TRFASVYAWN	Sequence	TRFASVYAW	TRFASVYAW	0.0169	-99.9	10.5823	649	LIGAEHVNNSY	LIGAVNNSY	LIGAEHVNNSY	0.0008	-99.9	9.8088	0.0036	0	9.8088
1262	PVLKGVKLHY	Sequence	VLKGVKLHY	VLKGVKLHY	0.0169	-99.9	10.5976	132	FQFCNDPF	FQFCNDP-F	FQFCNDPF	0.0008	-99.9	9.8162	0.0841	0	2.7294
573	DAVRDPQTL	Sequence	DAVRDPQTL	DAVRDPQTL	0.0168	-99.9	10.6168	954	NAQALNTLV	NAQALNTLV	NAQALNTLV	0.0008	-99.9	9.8309	0.0029	0	9.8309
955	AQALNTLVKQL	Sequence	AQALNTLVL	AQALNTLVKQL	0.0168	-99.9	10.6197	1041	FCGKGYHLM	FCGKGYHLM	FCGKGYHLM	0.0008	-99.9	9.8456	0.0042	0	9.8456
316	NFRVQPTESI	Sequence	NRVQPTESI	NFRVQPTESI	0.0167	-99.9	10.6505	1207	QYIKWPWYI	QYIKWPWYI	QYIKWPWYI	0.0008	-99.9	9.875	0.0017	0	9.875
40	KVFRSSVL	Sequence	KVFRS-SVL	KVFRSSVL	0.0166	-99.9	10.6624	564	FGRDIADTT	FGRDIADTT	FGRDIADTT	0.0008	-99.9	9.8971	0.0021	0	9.8971
576	RDPQTLEIL	Sequence	RDPQTLEIL	RDPQTLEIL	0.0166	-99.9	10.6661	1137	YDPLQPELDSF	YLQPELDSF	YDPLQPELDSF	0.0008	-99.9	9.9118	0.0054	0	9.9118
1055	APHGVVFLH	Sequence	APHGVVFLH	APHGVVFLH	0.0166	-99.9	10.6766	118	IVNNATNV	IVN-NATNV	IVNNATNV	0.0008	-99.9	9.9118	0.0011	0	9.9118
54	FLPFFSNVTW	Sequence	FLFFSNVTW	FLPFFSNVTW	0.0165	-99.9	10.7052	44	SSVLHSTQDL	SSVLHSTQL	SSVLHSTQDL	0.0008	-99.9	9.9191	0.0011	0	9.9191
165	CTFEYVSQPF	Sequence	CTFEVSQPF	CTFEYVSQPF	0.0162	-99.9	10.7726	423	KLPDDFTGC	KLPDDFTGC	KLPDDFTGC	0.0008	-99.9	9.9191	0.001	0	9.9191
730	MTKTSVDCTM	Sequence	MKTSVDCTM	MTKTSVDCTM	0.0162	-99.9	10.7879	906	NGIGVTQNV	NGIGVTQNV	NGIGVTQNV	0.0008	-99.9	9.9265	0.0034	0	9.9265
747	ECSNLLLQY	Sequence	ECSNLLLQY	ECSNLLLQY	0.0162	-99.9	10.7896	367	LYNSASFST	LYNSASFST	LYNSASFST	0.0008	-99.9	9.9265	0.0013	0	9.9265
683	ARSVASQSII	Sequence	ARSVASQSI	ARSVASQSII	0.0161	-99.9	10.8122	1012	IRAAEIRASA	IAAEIRASA	IRAAEIRASA	0.0008	-99.9	9.9559	0.0059	0	9.9559
130	CEFQFCNDPF	Sequence	CEFQFCNPF	CEFQFCNDPF	0.0161	-99.9	10.817	37	YPDKVFRSS	YPDKVFRSS	YPDKVFRSS	0.0008	-99.9	9.9632	0.0023	0	9.9632
1092	GVFVSNGTH	Sequence	GVFVSNGTH	GVFVSNGTH	0.0161	-99.9	10.8179	141	GVYYHKNNK	GVYYHKNNK	GVYYHKNNK	0.0008	-99.9	9.9632	0.0014	0	9.9632
432	VIAWNSNNL	Sequence	VIAWNSNNL	VIAWNSNNL	0.016	-99.9	10.8377	572	TDAVRDPQTL	TAVRDPQTL	TDAVRDPQTL	0.0008	-99.9	9.9853	0.0026	0	9.9853
328	FPNITNLCPF	Sequence	FNITNLCPF	FPNITNLCPF	0.0159	-99.9	10.853	966	SSNFGAISS	SSNFGAISS	SSNFGAISS	0.0008	-99.9	10.0085	0.0021	0	10.0085
171	SQPFLMDL	Sequence	SQ-PFLMDL	SQPFLMDL	0.0156	-99.9	10.9589	663	IPIGAGICA	IPIGAGICA	IPIGAGICA	0.0008	-99.9	10.0508	0.0045	0	10.0508
771	VEQDKNTQEV	Sequence	VEQDKNTEV	VEQDKNTQEV	0.0154	-99.9	11.0034	516	LLHAPATVC	LLHAPATVC	LLHAPATVC	0.0008	-99.9	10.0593	0.0095	0	10.0593
461	KPFERDISTEI	Sequence	KERDISTEI	KPFERDISTEI	0.0154	-99.9	11.0098	804	ILPDPSKPSK	ILPDPSPSK	ILPDPSKPSK	0.0008	-99.9	10.0593	0.0009	0	10.0593
384	TKLNDLCF	Sequence	TKLND-LCF	TKLNDLCF	0.0153	-99.9	11.0364	949	DVVNQNAQAL	VVNQNAQAL	VVNQNAQAL	0.0008	-99.9	10.0593	0.0008	0	10.0593
368	YNSASFSTFK	Sequence	YNSASFSTF	YNSASFSTF	0.0153	-99.9	11.0391	745	STECSNLLLQY	STSNLLLQY	STECSNLLLQY	0.0008	-99.9	10.0932	0.0014	0	10.0932
786	QIYKTPPIKDF	Sequence	QIYKTPPIF	QIYKTPPIKDF	0.0153	-99.9	11.0424	357	ISNCVADY	ISNCVAD-Y	ISNCVADY	0.0008	-99.9	10.1017	0.0019	0	10.1017
1085	KAHFPREGV	Sequence	KAHFPREGV	KAHFPREGV	0.0153	-99.9	11.0436	1032	VLGQSKRVDF	VLGQSKRVF	VLGQSKRVDF	0.0008	-99.9	10.1102	0.0106	0	9.6463
27	YTNSFTRGV	Sequence	YTNSFTRGV	YTNSFTRGV	0.0153	-99.9	11.0597	25	PAYTNSFTR	PAYTNSFTR	PAYTNSFTR	0.0008	-99.9	10.1525	0.0014	0	10.1525
125	VVIKVCEF	Sequence	VVIKV-CEF	VVIKVCEF	0.0152	-99.9	11.0909	753	LQYGSFCTQ	LQYGSFCTQ	LQYGSFCTQ	0.0008	-99.9	10.178	0.0439	0	4.3161
507	YRVVVLSFEL	Sequence	YRVVVSFEL	YRVVVLSFEL	0.0152	-99.9	11.1014	764	RALTGIAV	RAL-TGIAV	RALTGIAV	0.0008	-99.9	10.1864	0.0141	0	8.3707
860	LPPLLTDEM	Sequence	LPPLLTDEM	LPPLLTDEM	0.0151	-99.9	11.1142	1263	VLKGVKLHYT	VLKGVKLHY	VLKGVKLHY	0.0008	-99.9	10.1949	0.0064	0	10.1949
269	LQPRTFLL	Sequence	LQ-PRTFLL	LQPRTFLL	0.015	-99.9	11.1784	932	KIQDSLSST	KIQDSLSST	KIQDSLSST	0.0008	-99.9	10.2373	0.0011	0	10.2373
793	IKDFGGFNFS	Sequence	IKDFGGFNF	IKDFGGFNF	0.0149	-99.9	11.2066	1196	LIDLQELGKY	LIDLQELKY	LIDLQELGKY	0.0008	-99.9	10.2712	0.0032	0	10.2712
931	GKIQDSLSS	Sequence	GKIQDSLSS	GKIQDSLSS	0.0149	-99.9	11.2096	1205	YEQYIKWPWY	YQYIKWPWY	YEQYIKWPWY	0.0008	-99.9	10.2797	0.0561	0	3.6905
1065	TYVPAQEKNF	Sequence	TYVPAQKNF	TYVPAQEKNF	0.0148	-99.9	11.2254	447	NYNYLYRLF	NYNYLYRLF	NYNYLYRLF	0.0008	-99.9	10.2881	0.0075	0	10.2881
733	TSVDCTMY	Sequence	TSVDCTM-Y	TSVDCTMY	0.0148	-99.9	11.2299	283	TITDAVDCAL	TITDAVDAL	TITDAVDCAL	0.0008	-99.9	10.3136	0.0007	0	10.3136
144	YHKNNKSW	Sequence	YHK-NNKSW	YHKNNKSW	0.0147	-99.9	11.2663	58	FSNVTWFHA	FSNVTWFHA	FSNVTWFHA	0.0007	-99.9	10.3644	0.0011	0	10.3644
700	AENSVAYSN	Sequence	AENSVAYSN	AENSVAYSN	0.0147	-99.9	11.2859	952	NQNAQALNTL	NQAQALNTL	NQNAQALNTL	0.0007	-99.9	10.4322	0.0565	0	3.6717
890	GAALQIPF	Sequence	GAA-LQIPF	GAALQIPF	0.0147	-99.9	11.2911	683	ARSVASQSI	ARSVASQSI	ARSVASQSI	0.0007	-99.9	10.4492	0.144	1	1.5637
1021	ANLAATKM	Sequence	ANL-AATKM	ANLAATKM	0.0146	-99.9	11.3186	332	TNLCPFGEVF	TLCPFGEVF	TNLCPFGEVF	0.0007	-99.9	10.4492	0.0363	0	4.8962
825	VTLADAGF	Sequence	VTL-ADAGF	VTLADAGF	0.0146	-99.9	11.3223	54	FLPFFSNVT	FLPFFSNVT	FLPFFSNVT	0.0007	-99.9	10.4831	0.001	0	10.4831
916	YENQKLIA	Sequence	YENQKLIA-	YENQKLIA	0.0146	-99.9	11.3249	825	VTLADAGF	VTL-ADAGF	VTLADAGF	0.0007	-99.9	10.4915	0.0077	0	10.4915
851	AQKFNGLTVLP	Sequence	AQFNGLTVL	AQKFNGLTVL	0.0146	-99.9	11.3276	504	YQPYRVVVLSF	YQPYVVLSF	YQPYRVVVLSF	0.0007	-99.9	10.5	0.0825	0	2.7744
974	SVLNDILSRL	Sequence	SVLNDILSL	SVLNDILSRL	0.0146	-99.9	11.3287	895	IPFAMQMAYR	IPFAMQMAY	IPFAMQMAY	0.0007	-99.9	10.5169	0.0052	0	10.5169
625	ADQLTPTWRVY	Sequence	ALTPTWRVY	ADQLTPTWRVY	0.0145	-99.9	11.3482	890	GAALQIPF	GAA-LQIPF	GAALQIPF	0.0007	-99.9	10.5593	0.0077	0	10.5593
71	GTNGTKRF	Sequence	GTN-GTKRF	GTNGTKRF	0.0144	-99.9	11.3704	1147	FKEELDKYF	FKEELDKYF	FKEELDKYF	0.0007	-99.9	10.5678	0.1564	1	1.3969
447	NYNYLYRLF	Sequence	NYNYLYRLF	NYNYLYRLF	0.0143	-99.9	11.4418	575	VRDPQTLEIL	VRDPQTLEL	VRDPQTLEIL	0.0007	-99.9	10.5847	0.0423	0	4.4152
1004	QTYVTQQLI	Sequence	QTYVTQQLI	QTYVTQQLI	0.0142	-99.9	11.4651	342	NATRFASVYA	NATRFASVY	NATRFASVY	0.0007	-99.9	10.5932	0.0008	0	10.5932
184	NFKNLREFVF	Sequence	NKNLREFVF	NFKNLREFVF	0.0142	-99.9	11.4767	543	NGLTGTGVL	NGLTGTGVL	NGLTGTGVL	0.0007	-99.9	10.6017	0.0061	0	10.6017
782	AQVKQIYK	Sequence	AQVKQIYK-	AQVKQIYK	0.0141	-99.9	11.5056	56	PFFSNVTWF	PFFSNVTWF	PFFSNVTWF	0.0007	-99.9	10.6102	0.005	0	10.6102
774	DKNTQEVF	Sequence	DKN-TQEVF	DKNTQEVF	0.014	-99.9	11.5304	436	NSNNLDSKV	NSNNLDSKV	NSNNLDSKV	0.0007	-99.9	10.6102	0.0014	0	10.6102
303	KSFTVEKGI	Sequence	KSFTVEKGI	KSFTVEKGI	0.014	-99.9	11.5398	211	LVRDLPQGFS	LVRDLPQGF	LVRDLPQGF	0.0007	-99.9	10.6271	0.003	0	10.6271
913	NVLYENQKL	Sequence	NVLYENQKL	NVLYENQKL	0.014	-99.9	11.5455	452	YRLFRKSNL	YRLFRKSNL	YRLFRKSNL	0.0007	-99.9	10.661	0.0666	0	3.2766
666	GAGICASY	Sequence	GA-GICASY	GAGICASY	0.014	-99.9	11.5477	1011	LIRAAEIRA	LIRAAEIRA	LIRAAEIRA	0.0007	-99.9	10.678	0.0014	0	10.678
125	VVIKVCEFQF	Sequence	VVIKVEFQF	VVIKVCEFQF	0.014	-99.9	11.5496	1140	LQPELDSF	LQPELDS-F	LQPELDSF	0.0007	-99.9	10.6864	0.082	0	2.7872
275	LLKYNENGTI	Sequence	LKYNENGTI	LLKYNENGTI	0.014	-99.9	11.5541	805	LPDPSKPSK	LPDPSKPSK	LPDPSKPSK	0.0007	-99.9	10.6864	0.0025	0	10.6864
1	FVFLVLLPL	Sequence	FVFLVLLPL	FVFLVLLPL	0.0138	-99.9	11.6044	1063	HVTYVPAQE	HVTYVPAQE	HVTYVPAQE	0.0007	-99.9	10.6864	0.0005	0	10.6864
214	DLPQGFSAL	Sequence	DLPQGFSAL	DLPQGFSAL	0.0138	-99.9	11.6089	75	TKRFDNPVL	TKRFDNPVL	TKRFDNPVL	0.0007	-99.9	10.6949	0.1696	1	1.2653
200	FKIYSKHTPI	Sequence	FKYSKHTPI	FKIYSKHTPI	0.0138	-99.9	11.6097	177	DLEGKQGNF	DLEGKQGNF	DLEGKQGNF	0.0007	-99.9	10.6949	0.0053	0	10.6949
784	VKQIYKTPPI	Sequence	VQIYKTPPI	VKQIYKTPPI	0.0138	-99.9	11.6172	267	GYLQPRTF	GYLQPR-TF	GYLQPRTF	0.0007	-99.9	10.7119	0.0182	0	7.3236
472	YQAGSTPC	Sequence	YQA-GSTPC	YQAGSTPC	0.0136	-99.9	11.6976	900	QMAYRFNGI	QMAYRFNGI	QMAYRFNGI	0.0007	-99.9	10.7288	0.0054	0	10.7288
841	GDIAARDLI	Sequence	GDIAARDLI	GDIAARDLI	0.0136	-99.9	11.7006	325	IVRFPNITN	IVRFPNITN	IVRFPNITN	0.0007	-99.9	10.7458	0.0016	0	10.7458
453	RLFRKSNL	Sequence	RLFRK-SNL	RLFRKSNL	0.0135	-99.9	11.7412	1054	SAPHGVVFLH	SAPHGVVLH	SAPHGVVFLH	0.0007	-99.9	10.7542	0.0007	0	10.7542
1204	KYEQYIKWPWY	Sequence	KQYIKWPWY	KYEQYIKWPWY	0.0134	-99.9	11.7693	642	FQTRAGCLI	FQTRAGCLI	FQTRAGCLI	0.0007	-99.9	10.7797	0.0437	0	4.3298
188	LREFVFKNI	Sequence	LREFVFKNI	LREFVFKNI	0.0134	-99.9	11.7776	503	GYQPYRVVV	GYQPYRVVV	GYQPYRVVV	0.0007	-99.9	10.7797	0.0054	0	10.7797
514	FELLHAPATV	Sequence	FELHAPATV	FELLHAPATV	0.0133	-99.9	11.79	43	RSSVLHSTQ	RSSVLHSTQ	RSSVLHSTQ	0.0007	-99.9	10.7797	0.0021	0	10.7797
785	KQIYKTPPIK	Sequence	KQYKTPPIK	KQIYKTPPIK	0.0133	-99.9	11.805	1143	ELDSFKEEL	ELDSFKEEL	ELDSFKEEL	0.0007	-99.9	10.7966	0.003	0	10.7966
157	RVYSSANNC	Sequence	RVYSSANNC	RVYSSANNC	0.0133	-99.9	11.8069	928	SAIGKIQDS	SAIGKIQDS	SAIGKIQDS	0.0007	-99.9	10.822	0.0009	0	10.822
262	AAYYVGYL	Sequence	AAYYVG-YL	AAYYVGYL	0.0132	-99.9	11.8234	182	QGNFKNLREF	QGFKNLREF	QGNFKNLREF	0.0007	-99.9	10.8305	0.0201	0	6.9249
1211	WPWYIWLGF	Sequence	WPWYIWLGF	WPWYIWLGF	0.0132	-99.9	11.8287	506	PYRVVVLSF	PYRVVVLSF	PYRVVVLSF	0.0007	-99.9	10.839	0.011	0	9.4572
480	NGVEGFNCYF	Sequence	NGVEGFNYF	NGVEGFNCYF	0.0132	-99.9	11.8437	640	NVFQTRAGCL	NVFQTRAGL	NVFQTRAGCL	0.0007	-99.9	10.839	0.0006	0	10.839
764	RALTGIAVE	Sequence	RALTGIAVE	RALTGIAVE	0.0132	-99.9	11.8486	772	EQDKNTQEVF	EQDKNTQVF	EQDKNTQEVF	0.0007	-99.9	10.8814	0.112	0	2.0812
284	ITDAVDCAL	Sequence	ITDAVDCAL	ITDAVDCAL	0.0132	-99.9	11.8531	68	HVSGTNGTKR	HVSGTNGTR	HVSGTNGTKR	0.0007	-99.9	10.9153	0.0004	0	10.9153
193	FKNIDGYFKI	Sequence	FKIDGYFKI	FKNIDGYFKI	0.0132	-99.9	11.8542	1072	KNFTTAPAI	KNFTTAPAI	KNFTTAPAI	0.0007	-99.9	10.9322	0.0912	0	2.5329
1070	QEKNFTTAP	Sequence	QEKNFTTAP	QEKNFTTAP	0.0131	-99.9	11.8584	192	VFKNIDGY	#NAME?	VFKNIDGY	0.0007	-99.9	10.9322	0.0133	0	8.605
876	LLAGTITSG	Sequence	LLAGTITSG	LLAGTITSG	0.0131	-99.9	11.8651	807	DPSKPSKRSF	DSKPSKRSF	DPSKPSKRSF	0.0007	-99.9	10.9492	0.0035	0	10.9492
1090	REGVFVSNGTH	Sequence	REFVSNGTH	REGVFVSNGTH	0.0131	-99.9	11.8712	380	GVSPTKLNDL	GVSPTKLNL	GVSPTKLNDL	0.0007	-99.9	10.9661	0.0009	0	10.9661
331	ITNLCPFGEVF	Sequence	ITNPFGEVF	ITNLCPFGEVF	0.0131	-99.9	11.8813	1043	GKGYHLMSF	GKGYHLMSF	GKGYHLMSF	0.0007	-99.9	10.9831	0.384	1	0.1864
760	TQLNRALT	Sequence	TQLNRALT-	TQLNRALT	0.0131	-99.9	11.8911	709	NSIAIPTNFT	NSIAIPTNF	NSIAIPTNF	0.0007	-99.9	11.022	0.0031	0	11.022
791	PPIKDFGGF	Sequence	PPIKDFGGF	PPIKDFGGF	0.013	-99.9	11.9008	864	LTDEMIAQYT	LTDEMIAQY	LTDEMIAQY	0.0007	-99.9	11.033	0.001	0	11.033
561	FQQFGRDI	Sequence	FQQFGRDI-	FQQFGRDI	0.013	-99.9	11.9057	401	IRGDEVRQI	IRGDEVRQI	IRGDEVRQI	0.0007	-99.9	11.0879	0.0574	0	3.6301
413	QTGKIADY	Sequence	#NAME?	QTGKIADY	0.0129	-99.9	11.9414	206	HTPINLVRDL	HTPINLVRL	HTPINLVRDL	0.0007	-99.9	11.1319	0.0005	0	11.1319
1157	NHTSPDVDL	Sequence	NHTSPDVDL	NHTSPDVDL	0.0129	-99.9	11.9545	772	EQDKNTQEV	EQDKNTQEV	EQDKNTQEV	0.0007	-99.9	11.2198	0.0161	0	7.8171
788	YKTPPIKDFG	Sequence	YKTPPIKDF	YKTPPIKDF	0.0129	-99.9	11.9606	1063	HVTYVPAQEK	HTYVPAQEK	HVTYVPAQEK	0.0007	-99.9	11.2198	0.0006	0	11.2198
1145	DSFKEELDKY	Sequence	DSFKEELKY	DSFKEELDKY	0.0128	-99.9	11.9745	74	GTKRFDNPV	GTKRFDNPV	GTKRFDNPV	0.0006	-99.9	11.2967	0.0015	0	11.2967
29	NSFTRGVYYP	Sequence	NSFTRGVYY	NSFTRGVYY	0.0128	-99.9	12.0055	1226	IVMVTIML	IVM-VTIML	IVMVTIML	0.0006	-99.9	11.3846	0.0015	0	11.3846
1008	TQQLIRAAE	Sequence	TQQLIRAAE	TQQLIRAAE	0.0127	-99.9	12.0305	1069	AQEKNFTTA	AQEKNFTTA	AQEKNFTTA	0.0006	-99.9	11.4066	0.116	1	1.9958
1017	IRASANLA	Sequence	IRASANLA-	IRASANLA	0.0127	-99.9	12.0333	440	LDSKVGGNY	LDSKVGGNY	LDSKVGGNY	0.0006	-99.9	11.4505	0.0884	0	2.6107
932	KIQDSLSSTA	Sequence	KQDSLSSTA	KIQDSLSSTA	0.0126	-99.9	12.0597	844	AARDLICAQK	AARDLIAQK	AARDLICAQK	0.0006	-99.9	11.4945	0.0009	0	11.4945
137	DPFLGVYY	Sequence	DPFLG-VYY	DPFLGVYY	0.0125	-99.9	12.1002	897	FAMQMAYR	FAM-QMAYR	FAMQMAYR	0.0006	-99.9	11.4945	0.0004	0	11.4945
34	GVYYPDKVFR	Sequence	GVYYPDKVF	GVYYPDKVF	0.0125	-99.9	12.1043	872	YTSALLAGT	YTSALLAGT	YTSALLAGT	0.0006	-99.9	11.5275	0.0004	0	11.5275
1208	YIKWPWYIW	Sequence	YIKWPWYIW	YIKWPWYIW	0.0125	-99.9	12.128	1217	LGFIAGLIA	LGFIAGLIA	LGFIAGLIA	0.0006	-99.9	11.5385	0.0064	0	11.5385
200	FKIYSKHTP	Sequence	FKIYSKHTP	FKIYSKHTP	0.0124	-99.9	12.1476	698	LGAENSVAYS	LGAENSVAY	LGAENSVAY	0.0006	-99.9	11.5385	0.0056	0	11.5385
1102	FVTQRNFY	Sequence	FVTQRNF-Y	FVTQRNFY	0.0124	-99.9	12.1481	1061	FLHVTYVPA	FLHVTYVPA	FLHVTYVPA	0.0006	-99.9	11.5495	0.0039	0	11.5495
68	HVSGTNGTKRF	Sequence	HVSGTNGTF	HVSGTNGTKRF	0.0124	-99.9	12.1759	967	SNFGAISSVL	SNFGAISSL	SNFGAISSVL	0.0006	-99.9	11.5604	0.0347	0	5.0303
209	INLVRDLPQGF	Sequence	IVRDLPQGF	INLVRDLPQGF	0.0123	-99.9	12.2182	632	WRVYSTGSNV	WVYSTGSNV	WRVYSTGSNV	0.0006	-99.9	11.5604	0.0038	0	11.5604
1132	VNNTVYDPL	Sequence	VNNTVYDPL	VNNTVYDPL	0.0123	-99.9	12.226	637	TGSNVFQTR	TGSNVFQTR	TGSNVFQTR	0.0006	-99.9	11.5714	0.0009	0	11.5714
984	DKVEAEVQI	Sequence	DKVEAEVQI	DKVEAEVQI	0.0122	-99.9	12.2442	1173	ASVVNIQKEI	ASVVNIQEI	ASVVNIQKEI	0.0006	-99.9	11.5714	0.0008	0	11.5714
20	RTQLPPAYTN	Sequence	RQLPPAYTN	RTQLPPAYTN	0.0122	-99.9	12.2569	710	SIAIPTNFT	SIAIPTNFT	SIAIPTNFT	0.0006	-99.9	11.5824	0.0005	0	11.5824
1217	LGFIAGLIA	Sequence	LGFIAGLIA	LGFIAGLIA	0.0122	-99.9	12.2624	454	LFRKSNLKPF	LFRKSNLKF	LFRKSNLKPF	0.0006	-99.9	11.5934	0.0227	0	6.444
686	VASQSIIAYTM	Sequence	VQSIIAYTM	VASQSIIAYTM	0.0121	-99.9	12.2907	395	YADSFVIRG	YADSFVIRG	YADSFVIRG	0.0006	-99.9	11.6044	0.0015	0	11.6044
1263	VLKGVKLHYT	Sequence	VLKGVKLHY	VLKGVKLHY	0.0121	-99.9	12.3203	881	ITSGWTFGA	ITSGWTFGA	ITSGWTFGA	0.0006	-99.9	11.6154	0.0007	0	11.6154
1170	GINASVVNI	Sequence	GINASVVNI	GINASVVNI	0.012	-99.9	12.3276	603	TSNQVAVL	TSN-QVAVL	TSNQVAVL	0.0006	-99.9	11.6264	0.0022	0	11.6264
762	LNRALTGIAV	Sequence	LRALTGIAV	LNRALTGIAV	0.012	-99.9	12.3353	318	RVQPTESI	RVQP-TESI	RVQPTESI	0.0006	-99.9	11.6374	0.0035	0	11.6374
1104	TQRNFYEPQI	Sequence	TQRNFYPQI	TQRNFYEPQI	0.012	-99.9	12.3408	732	KTSVDCTMYI	KTSVDTMYI	KTSVDCTMYI	0.0006	-99.9	11.6484	0.0007	0	11.6484
143	YYHKNNKSWM	Sequence	YYHKNNKSM	YYHKNNKSWM	0.012	-99.9	12.3585	394	VYADSFVIR	VYADSFVIR	VYADSFVIR	0.0006	-99.9	11.6593	0.0044	0	11.6593
981	SRLDKVEAE	Sequence	SRLDKVEAE	SRLDKVEAE	0.0119	-99.9	12.385	712	AIPTNFTISV	AIPNFTISV	AIPTNFTISV	0.0006	-99.9	11.6593	0.0006	0	11.6593
921	LIANQFNSA	Sequence	LIANQFNSA	LIANQFNSA	0.0119	-99.9	12.3964	226	VDLPIGINI	VDLPIGINI	VDLPIGINI	0.0006	-99.9	11.6703	0.0301	0	5.482
1062	LHVTYVPAQ	Sequence	LHVTYVPAQ	LHVTYVPAQ	0.0118	-99.9	12.4629	875	ALLAGTITS	ALLAGTITS	ALLAGTITS	0.0006	-99.9	11.6703	0.0105	0	9.6719
1094	FVSNGTHW	Sequence	FVS-NGTHW	FVSNGTHW	0.0117	-99.9	12.467	150	SWMESEFRV	SWMESEFRV	SWMESEFRV	0.0006	-99.9	11.6813	0.002	0	11.6813
1219	FIAGLIAIVM	Sequence	FIAGIAIVM	FIAGLIAIVM	0.0117	-99.9	12.4898	853	KFNGLTVL	KFN-GLTVL	KFNGLTVL	0.0006	-99.9	11.6923	0.0161	0	7.7904
1039	VDFCGKGYHL	Sequence	VDFGKGYHL	VDFCGKGYHL	0.0117	-99.9	12.4993	481	GVEGFNCY	GV-EGFNCY	GVEGFNCY	0.0006	-99.9	11.6923	0.0044	0	11.6923
247	YLTPGDSSSGW	Sequence	YLTPGDSSW	YLTPGDSSSGW	0.0116	-99.9	12.513	276	LKYNENGTI	LKYNENGTI	LKYNENGTI	0.0006	-99.9	11.7033	0.1463	1	1.5337
789	KTPPIKDF	Sequence	KT-PPIKDF	KTPPIKDF	0.0116	-99.9	12.5449	892	ALQIPFAM	ALQ-IPFAM	ALQIPFAM	0.0006	-99.9	11.7033	0.014	0	8.3674
902	AYRFNGIGV	Sequence	AYRFNGIGV	AYRFNGIGV	0.0115	-99.9	12.5631	1002	SLQTYVTQQL	SQTYVTQQL	SLQTYVTQQL	0.0006	-99.9	11.7253	0.0204	0	6.8624
1109	YEPQIITT	Sequence	YEPQIITT-	YEPQIITT	0.0115	-99.9	12.5636	65	HAIHVSGTN	HAIHVSGTN	HAIHVSGTN	0.0006	-99.9	11.7253	0.0007	0	11.7253
543	NGLTGTGVL	Sequence	NGLTGTGVL	NGLTGTGVL	0.0115	-99.9	12.5868	816	FIEDLLFNK	FIEDLLFNK	FIEDLLFNK	0.0006	-99.9	11.7253	0.0004	0	11.7253
1201	ELGKYEQY	Sequence	#NAME?	ELGKYEQY	0.0115	-99.9	12.5877	1051	FPQSAPHGVV	FQSAPHGVV	FPQSAPHGVV	0.0006	-99.9	11.7363	0.0089	0	10.4798
134	FCNDPFLGVYY	Sequence	FCNDPGVYY	FCNDPFLGVYY	0.0114	-99.9	12.6137	1098	GTHWFVTQR	GTHWFVTQR	GTHWFVTQR	0.0006	-99.9	11.7363	0.0006	0	11.7363
968	NFGAISSVL	Sequence	NFGAISSVL	NFGAISSVL	0.0114	-99.9	12.6164	1112	QIITTDNTFV	QIITTDNTF	QIITTDNTF	0.0006	-99.9	11.7473	0.0033	0	11.7473
212	VRDLPQGFSA	Sequence	VRDPQGFSA	VRDLPQGFSA	0.0114	-99.9	12.6178	363	DYSVLYNSASF	DVLYNSASF	DYSVLYNSASF	0.0006	-99.9	11.7473	0.0007	0	11.7473
500	NGVGYQPY	Sequence	NGV-GYQPY	NGVGYQPY	0.0114	-99.9	12.6205	697	SLGAENSVAYS	SLAENSVAY	SLGAENSVAY	0.0006	-99.9	11.7582	0.0013	0	11.7582
689	QSIIAYTM	Sequence	#NAME?	QSIIAYTM	0.0113	-99.9	12.6465	408	QIAPGQTGKI	QIAPGQTKI	QIAPGQTGKI	0.0006	-99.9	11.7582	0.0007	0	11.7582
235	TRFQTLLA	Sequence	TRFQTLLA-	TRFQTLLA	0.0113	-99.9	12.6806	937	LSSTASAL	LSS-TASAL	LSSTASAL	0.0006	-99.9	11.7692	0.0016	0	11.7692
344	TRFASVYA	Sequence	TRFASVYA-	TRFASVYA	0.0113	-99.9	12.6852	804	ILPDPSKPS	ILPDPSKPS	ILPDPSKPS	0.0006	-99.9	11.7692	0.0009	0	11.7692
1069	AQEKNFTT	Sequence	AQEKNFTT-	AQEKNFTT	0.0112	-99.9	12.7148	44	SSVLHSTQDLF	SSVLHSTQF	SSVLHSTQDLF	0.0006	-99.9	11.8352	0.0029	0	11.8352
886	TFGAGAAL	Sequence	T-FGAGAAL	TFGAGAAL	0.0112	-99.9	12.7203	1261	EPVLKGVKLHY	ELKGVKLHY	EPVLKGVKLHY	0.0006	-99.9	11.8791	0.0015	0	11.8791
212	VRDLPQGFSAL	Sequence	VRDQGFSAL	VRDLPQGFSAL	0.0112	-99.9	12.7216	601	TNTSNQVAVL	TTSNQVAVL	TNTSNQVAVL	0.0006	-99.9	11.9011	0.0008	0	11.9011
342	NATRFASVYAW	Sequence	NRFASVYAW	NATRFASVYAW	0.0112	-99.9	12.733	399	FVIRGDEVRQI	FVIDEVRQI	FVIRGDEVRQI	0.0006	-99.9	11.9011	0.0006	0	11.9011
1015	AEIRASANLA	Sequence	AERASANLA	AEIRASANLA	0.0112	-99.9	12.7367	161	SANNCTFEYV	SANNCTFEY	SANNCTFEY	0.0006	-99.9	11.9231	0.001	0	11.9231
1039	VDFCGKGY	Sequence	VDF-CGKGY	VDFCGKGY	0.0111	-99.9	12.7399	863	LLTDEMIAQ	LLTDEMIAQ	LLTDEMIAQ	0.0006	-99.9	11.956	0.0017	0	11.956
1008	TQQLIRAA	Sequence	TQQ-LIRAA	TQQLIRAA	0.0111	-99.9	12.7408	5	VLLPLVSSQ	VLLPLVSSQ	VLLPLVSSQ	0.0006	-99.9	11.967	0.0059	0	11.967
5	VLLPLVSSQ	Sequence	VLLPLVSSQ	VLLPLVSSQ	0.0111	-99.9	12.7494	346	FASVYAWNR	FASVYAWNR	FASVYAWNR	0.0006	-99.9	12	0.0004	0	12
1012	IRAAEIRASA	Sequence	IRAAEIRAA	IRAAEIRASA	0.0111	-99.9	12.7736	1199	LQELGKYEQY	LQLGKYEQY	LQELGKYEQY	0.0006	-99.9	12.026	0.1536	1	1.4342
198	GYFKIYSKH	Sequence	GYFKIYSKH	GYFKIYSKH	0.011	-99.9	12.7904	686	VASQSIIAYTM	VASQSIITM	VASQSIIAYTM	0.0006	-99.9	12.0519	0.0064	0	12.0519
462	PFERDISTEI	Sequence	FERDISTEI	FERDISTEI	0.011	-99.9	12.8132	93	STEKSNIIR	STEKSNIIR	STEKSNIIR	0.0006	-99.9	12.0519	0.0005	0	12.0519
1180	KEIDRLNE	Sequence	KEIDRLNE-	KEIDRLNE	0.0107	-99.9	12.9417	638	GSNVFQTRA	GSNVFQTRA	GSNVFQTRA	0.0006	-99.9	12.1039	0.002	0	12.1039
484	GFNCYFPLQSY	Sequence	GFYFPLQSY	GFNCYFPLQSY	0.0106	-99.9	12.9658	98	NIIRGWIF	NII-RGWIF	NIIRGWIF	0.0006	-99.9	12.1169	0.0022	0	12.1169
698	LGAENSVAYS	Sequence	LGAENSVAY	LGAENSVAY	0.0106	-99.9	12.9708	711	IAIPTNFTIS	IAIPNFTIS	IAIPTNFTIS	0.0006	-99.9	12.1299	0.0008	0	12.1299
1178	IQKEIDRLN	Sequence	IQKEIDRLN	IQKEIDRLN	0.0106	-99.9	12.9713	973	SSVLNDILSR	SSVNDILSR	SSVLNDILSR	0.0006	-99.9	12.1299	0.0004	0	12.1299
136	NDPFLGVY	Sequence	ND-PFLGVY	NDPFLGVY	0.0106	-99.9	12.9868	393	NVYADSFVIR	NVYADSVIR	NVYADSFVIR	0.0006	-99.9	12.1818	0.0005	0	12.1818
386	LNDLCFTNVY	Sequence	LNLCFTNVY	LNDLCFTNVY	0.0106	-99.9	12.9936	54	FLPFFSNVTWF	FLPSNVTWF	FLPFFSNVTWF	0.0006	-99.9	12.1948	0.0022	0	12.1948
1138	DPLQPELDSF	Sequence	DLQPELDSF	DPLQPELDSF	0.0106	-99.9	12.9973	865	TDEMIAQY	#NAME?	TDEMIAQY	0.0006	-99.9	12.2338	0.0051	0	12.2338
249	TPGDSSSGW	Sequence	TPGDSSSGW	TPGDSSSGW	0.0105	-99.9	13.073	379	YGVSPTKL	YGV-SPTKL	YGVSPTKL	0.0006	-99.9	12.2987	0.0028	0	12.2987
402	RGDEVRQIA	Sequence	RGDEVRQIA	RGDEVRQIA	0.0104	-99.9	13.0915	417	IADYNYKL	IADYN-YKL	IADYNYKL	0.0006	-99.9	12.2987	0.0008	0	12.2987
1100	HWFVTQRNFY	Sequence	HFVTQRNFY	HWFVTQRNFY	0.0104	-99.9	13.1094	83	LPFNDGVYFA	LPFNDGVYF	LPFNDGVYF	0.0006	-99.9	12.3117	0.0091	0	10.4007
433	IAWNSNNL	Sequence	IAW-NSNNL	IAWNSNNL	0.0103	-99.9	13.1507	706	YSNNSIAIP	YSNNSIAIP	YSNNSIAIP	0.0006	-99.9	12.3117	0.0011	0	12.3117
856	GLTVLPPLL	Sequence	GLTVLPPLL	GLTVLPPLL	0.0103	-99.9	13.1573	308	EKGIYQTSNF	EGIYQTSNF	EKGIYQTSNF	0.0006	-99.9	12.3247	0.0089	0	10.488
710	SIAIPTNFTI	Sequence	SAIPTNFTI	SIAIPTNFTI	0.0103	-99.9	13.177	117	LIVNNATNVV	LVNNATNVV	LIVNNATNVV	0.0006	-99.9	12.3377	0.0008	0	12.3377
1092	GVFVSNGTHWF	Sequence	GVFVSNGTF	GVFVSNGTHWF	0.0102	-99.9	13.2039	786	QIYKTPPIKDF	QIYPPIKDF	QIYKTPPIKDF	0.0006	-99.9	12.3506	0.0079	0	11.0424
302	LKSFTVEKGIY	Sequence	LKSFTVGIY	LKSFTVEKGIY	0.0102	-99.9	13.2255	857	LTVLPPLLT	LTVLPPLLT	LTVLPPLLT	0.0006	-99.9	12.3506	0.0005	0	12.3506
169	YVSQPFLM	Sequence	YVSQPFL-M	YVSQPFLM	0.0102	-99.9	13.235	687	ASQSIIAYT	ASQSIIAYT	ASQSIIAYT	0.0006	-99.9	12.3636	0.001	0	12.3636
777	TQEVFAQVK	Sequence	TQEVFAQVK	TQEVFAQVK	0.0101	-99.9	13.2584	1214	YIWLGFIAGL	YILGFIAGL	YIWLGFIAGL	0.0006	-99.9	12.4026	0.0016	0	12.4026
562	QQFGRDIAD	Sequence	QQFGRDIAD	QQFGRDIAD	0.0101	-99.9	13.2608	366	VLYNSASFS	VLYNSASFS	VLYNSASFS	0.0006	-99.9	12.4026	0.0014	0	12.4026
503	GYQPYRVVV	Sequence	GYQPYRVVV	GYQPYRVVV	0.0101	-99.9	13.2799	487	CYFPLQSY	CYF-PLQSY	CYFPLQSY	0.0005	-99.9	12.4286	0.0118	0	9.1251
1090	REGVFVSNG	Sequence	REGVFVSNG	REGVFVSNG	0.0101	-99.9	13.2919	1228	MVTIMLCCM	MVTIMLCCM	MVTIMLCCM	0.0005	-99.9	12.4286	0.0006	0	12.4286
900	QMAYRFNGI	Sequence	QMAYRFNGI	QMAYRFNGI	0.01	-99.9	13.3421	600	GTNTSNQVA	GTNTSNQVA	GTNTSNQVA	0.0005	-99.9	12.4545	0.002	0	12.4545
685	SVASQSIIA	Sequence	SVASQSIIA	SVASQSIIA	0.01	-99.9	13.3529	492	QSYGFQPTN	QSYGFQPTN	QSYGFQPTN	0.0005	-99.9	12.4545	0.0015	0	12.4545
1137	YDPLQPELDSF	Sequence	YLQPELDSF	YDPLQPELDSF	0.01	-99.9	13.3547	1264	LKGVKLHY	#NAME?	LKGVKLHY	0.0005	-99.9	12.4805	0.0492	0	3.9901
1046	YHLMSFPQSA	Sequence	YHMSFPQSA	YHLMSFPQSA	0.01	-99.9	13.36	71	GTNGTKRF	GTN-GTKRF	GTNGTKRF	0.0005	-99.9	12.4805	0.0075	0	11.3704
1003	LQTYVTQQLI	Sequence	LQYVTQQLI	LQTYVTQQLI	0.01	-99.9	13.3678	108	TLDSKTQSLL	TLSKTQSLL	TLDSKTQSLL	0.0005	-99.9	12.5065	0.0011	0	12.5065
177	DLEGKQGNF	Sequence	DLEGKQGNF	DLEGKQGNF	0.0099	-99.9	13.3864	903	YRFNGIGV	YRFNGI-GV	YRFNGIGV	0.0005	-99.9	12.5195	0.0373	0	4.7998
990	VQIDRLITGR	Sequence	VQIDRLITR	VQIDRLITGR	0.0099	-99.9	13.3959	198	GYFKIYSKH	GYFKIYSKH	GYFKIYSKH	0.0005	-99.9	12.5325	0.0058	0	12.5325
1029	SECVLGQSK	Sequence	SECVLGQSK	SECVLGQSK	0.0099	-99.9	13.4055	1224	IAIVMVTI	IAI-VMVTI	IAIVMVTI	0.0005	-99.9	12.5584	0.0016	0	12.5584
422	YKLPDDFTG	Sequence	YKLPDDFTG	YKLPDDFTG	0.0099	-99.9	13.4055	925	QFNSAIGKI	QFNSAIGKI	QFNSAIGKI	0.0005	-99.9	12.5844	0.0023	0	12.5844
1209	IKWPWYIW	Sequence	IKW-PWYIW	IKWPWYIW	0.0098	-99.9	13.4498	398	SFVIRGDEV	SFVIRGDEV	SFVIRGDEV	0.0005	-99.9	12.5844	0.0022	0	12.5844
556	KKFLPFQQ	Sequence	KKFLPFQQ-	KKFLPFQQ	0.0098	-99.9	13.4539	457	KSNLKPFER	KSNLKPFER	KSNLKPFER	0.0005	-99.9	12.5844	0.0006	0	12.5844
254	SSGWTAGAAAY	Sequence	SSTAGAAAY	SSGWTAGAAAY	0.0098	-99.9	13.4563	453	RLFRKSNLK	RLFRKSNLK	RLFRKSNLK	0.0005	-99.9	12.5974	0.0048	0	12.5974
279	NENGTITDAV	Sequence	NENGTITAV	NENGTITDAV	0.0098	-99.9	13.4659	922	IANQFNSA	IANQ-FNSA	IANQFNSA	0.0005	-99.9	12.6104	0.0024	0	12.6104
1013	RAAEIRASANL	Sequence	REIRASANL	RAAEIRASANL	0.0097	-99.9	13.4994	17	LTTRTQLPPAY	LTTRTQLAY	LTTRTQLPPAY	0.0005	-99.9	12.6234	0.0173	0	7.4847
1025	ATKMSECVL	Sequence	ATKMSECVL	ATKMSECVL	0.0097	-99.9	13.5042	149	KSWMESEFRVY	KSWSEFRVY	KSWMESEFRVY	0.0005	-99.9	12.6234	0.0131	0	8.666
566	RDIADTTDA	Sequence	RDIADTTDA	RDIADTTDA	0.0097	-99.9	13.5066	96	KSNIIRGW	KSN-IIRGW	KSNIIRGW	0.0005	-99.9	12.6494	0.0015	0	12.6494
515	ELLHAPATV	Sequence	ELLHAPATV	ELLHAPATV	0.0097	-99.9	13.5203	415	GKIADYNYKL	GIADYNYKL	GKIADYNYKL	0.0005	-99.9	12.6753	0.0287	0	5.6457
895	IPFAMQMAYR	Sequence	IPFAMQMAY	IPFAMQMAY	0.0097	-99.9	13.5209	74	GTKRFDNPVL	GTRFDNPVL	GTKRFDNPVL	0.0005	-99.9	12.6753	0.0113	0	9.334
266	VGYLQPRTFL	Sequence	VGYLQPRTF	VGYLQPRTF	0.0097	-99.9	13.5263	732	KTSVDCTM	KTS-VDCTM	KTSVDCTM	0.0005	-99.9	12.6753	0.0013	0	12.6753
834	KQYGDCLG	Sequence	KQYGDCLG-	KQYGDCLG	0.0097	-99.9	13.5437	890	GAALQIPFA	GAALQIPFA	GAALQIPFA	0.0005	-99.9	12.6753	0.0013	0	12.6753
952	NQNAQALNT	Sequence	NQNAQALNT	NQNAQALNT	0.0097	-99.9	13.5472	510	VVLSFELLH	VVLSFELLH	VVLSFELLH	0.0005	-99.9	12.7013	0.003	0	12.7013
461	KPFERDIST	Sequence	KPFERDIST	KPFERDIST	0.0096	-99.9	13.5562	204	SKHTPINLV	SKHTPINLV	SKHTPINLV	0.0005	-99.9	12.7143	0.0884	0	2.6079
865	TDEMIAQY	Sequence	TD-EMIAQY	TDEMIAQY	0.0096	-99.9	13.561	534	KNKCVNFNF	KNKCVNFNF	KNKCVNFNF	0.0005	-99.9	12.7143	0.0686	0	3.2026
503	GYQPYRVVVL	Sequence	GQPYRVVVL	GYQPYRVVVL	0.0096	-99.9	13.5646	561	FQQFGRDIA	FQQFGRDIA	FQQFGRDIA	0.0005	-99.9	12.7273	0.0354	0	4.9662
509	VVVLSFELL	Sequence	VVVLSFELL	VVVLSFELL	0.0096	-99.9	13.5772	1087	HFPREGVF	H-FPREGVF	HFPREGVF	0.0005	-99.9	12.7273	0.0106	0	9.6084
785	KQIYKTPP	Sequence	KQIYKTPP-	KQIYKTPP	0.0095	-99.9	13.6124	664	PIGAGICASY	PIGAGIASY	PIGAGICASY	0.0005	-99.9	12.7273	0.0024	0	12.7273
779	EVFAQVKQI	Sequence	EVFAQVKQI	EVFAQVKQI	0.0095	-99.9	13.634	137	DPFLGVYY	DPF-LGVYY	DPFLGVYY	0.0005	-99.9	12.7403	0.0065	0	12.1002
531	NLVKNKCVNF	Sequence	NLVKNKVNF	NLVKNKCVNF	0.0095	-99.9	13.6405	601	TNTSNQVAVLY	TSNQVAVLY	TNTSNQVAVLY	0.0005	-99.9	12.7662	0.0019	0	12.7662
84	PFNDGVYF	Sequence	#NAME?	PFNDGVYF	0.0095	-99.9	13.6411	673	YQTQTNSPR	YQTQTNSPR	YQTQTNSPR	0.0005	-99.9	12.7922	0.009	0	10.4441
445	GGNYNYLY	Sequence	GGN-YNYLY	GGNYNYLY	0.0095	-99.9	13.6411	731	TKTSVDCTM	TKTSVDCTM	TKTSVDCTM	0.0005	-99.9	12.8052	0.0765	0	2.9371
832	FIKQYGDCL	Sequence	FIKQYGDCL	FIKQYGDCL	0.0095	-99.9	13.6519	901	MAYRFNGI	MAY-RFNGI	MAYRFNGI	0.0005	-99.9	12.8312	0.0018	0	12.8312
625	ADQLTPTWRV	Sequence	AQLTPTWRV	ADQLTPTWRV	0.0094	-99.9	13.6878	600	GTNTSNQVAV	GTNSNQVAV	GTNTSNQVAV	0.0005	-99.9	12.8442	0.0006	0	12.8442
814	RSFIEDLLFN	Sequence	RSFIEDLLF	RSFIEDLLF	0.0094	-99.9	13.7004	1013	RAAEIRAS	RAAEIRAS-	RAAEIRAS	0.0005	-99.9	12.8571	0.0021	0	12.8571
392	TNVYADSF	Sequence	TNV-YADSF	TNVYADSF	0.0094	-99.9	13.7033	875	ALLAGTITSGW	ALLAGTITW	ALLAGTITSGW	0.0005	-99.9	12.8831	0.0049	0	12.8831
875	ALLAGTITSGW	Sequence	ALLAGTITW	ALLAGTITSGW	0.0094	-99.9	13.7285	1110	EPQIITTDNTF	EIITTDNTF	EPQIITTDNTF	0.0005	-99.9	12.9221	0.0016	0	12.9221
1041	FCGKGYHLMSF	Sequence	FKGYHLMSF	FCGKGYHLMSF	0.0093	-99.9	13.7356	898	AMQMAYRF	AMQ-MAYRF	AMQMAYRF	0.0005	-99.9	12.9481	0.0273	0	5.8123
1194	ESLIDLQEL	Sequence	ESLIDLQEL	ESLIDLQEL	0.0093	-99.9	13.7817	96	KSNIIRGWI	KSNIIRGWI	KSNIIRGWI	0.0005	-99.9	12.974	0.001	0	12.974
907	GIGVTQNVL	Sequence	GIGVTQNVL	GIGVTQNVL	0.0093	-99.9	13.7817	869	IAQYTSALLA	IAYTSALLA	IAQYTSALLA	0.0005	-99.9	12.987	0.0089	0	10.4602
183	GNFKNLREFVF	Sequence	GNFKNLRVF	GNFKNLREFVF	0.0093	-99.9	13.7829	123	TNVVIKVCEF	TVVIKVCEF	TNVVIKVCEF	0.0005	-99.9	12.987	0.0034	0	12.987
700	AENSVAYS	Sequence	AENSVAYS-	AENSVAYS	0.0093	-99.9	13.7847	903	YRFNGIGVTQ	YFNGIGVTQ	YRFNGIGVTQ	0.0005	-99.9	13	0.0369	0	4.8343
56	PFFSNVTWF	Sequence	PFFSNVTWF	PFFSNVTWF	0.0093	-99.9	13.7853	1048	LMSFPQSAPH	LSFPQSAPH	LMSFPQSAPH	0.0005	-99.9	13	0.0025	0	13
688	SQSIIAYT	Sequence	SQSIIAYT-	SQSIIAYT	0.0093	-99.9	13.7853	765	ALTGIAVEQ	ALTGIAVEQ	ALTGIAVEQ	0.0005	-99.9	13.0484	0.0018	0	13.0484
1018	RASANLAAT	Sequence	RASANLAAT	RASANLAAT	0.0092	-99.9	13.8206	969	FGAISSVL	FGA-ISSVL	FGAISSVL	0.0005	-99.9	13.0484	0.0013	0	13.0484
1007	VTQQLIRAA	Sequence	VTQQLIRAA	VTQQLIRAA	0.0092	-99.9	13.8361	516	LLHAPATV	LLH-APATV	LLHAPATV	0.0005	-99.9	13.0806	0.0023	0	13.0806
233	NITRFQTLLAL	Sequence	NRFQTLLAL	NITRFQTLLAL	0.0091	-99.9	13.8529	311	IYQTSNFRV	IYQTSNFRV	IYQTSNFRV	0.0005	-99.9	13.0806	0.0013	0	13.0806
682	RARSVASQS	Sequence	RARSVASQS	RARSVASQS	0.0091	-99.9	13.8678	1102	FVTQRNFYE	FVTQRNFYE	FVTQRNFYE	0.0005	-99.9	13.0806	0.0003	0	13.0806
453	RLFRKSNLK	Sequence	RLFRKSNLK	RLFRKSNLK	0.009	-99.9	13.9127	76	KRFDNPVLP	KRFDNPVLP	KRFDNPVLP	0.0005	-99.9	13.0968	0.0374	0	4.7916
617	TEVPVAIH	Sequence	TEV-PVAIH	TEVPVAIH	0.009	-99.9	13.9617	994	RLITGRLQS	RLITGRLQS	RLITGRLQS	0.0005	-99.9	13.0968	0.0111	0	9.3847
966	SSNFGAISSV	Sequence	SNFGAISSV	SSNFGAISSV	0.0089	-99.9	13.9791	20	RTQLPPAYT	RTQLPPAYT	RTQLPPAYT	0.0005	-99.9	13.0968	0.0015	0	13.0968
566	RDIADTTDAV	Sequence	RDIADTTAV	RDIADTTDAV	0.0089	-99.9	13.9958	1158	HTSPDVDL	HTSPDVD-L	HTSPDVDL	0.0005	-99.9	13.0968	0.0005	0	13.0968
1012	IRAAEIRA	Sequence	IRAAEIRA-	IRAAEIRA	0.0089	-99.9	14.0307	935	DSLSSTASAL	SLSSTASAL	SLSSTASAL	0.0005	-99.9	13.1129	0.0008	0	13.1129
661	CDIPIGAGI	Sequence	CDIPIGAGI	CDIPIGAGI	0.0088	-99.9	14.0778	874	SALLAGTIT	SALLAGTIT	SALLAGTIT	0.0005	-99.9	13.2097	0.002	0	13.2097
986	VEAEVQIDR	Sequence	VEAEVQIDR	VEAEVQIDR	0.0087	-99.9	14.1577	640	NVFQTRAGC	NVFQTRAGC	NVFQTRAGC	0.0005	-99.9	13.2097	0.0005	0	13.2097
828	ADAGFIKQYG	Sequence	ADAGFIKQY	ADAGFIKQY	0.0086	-99.9	14.1799	1195	SLIDLQELGK	SLIDLQELK	SLIDLQELGK	0.0005	-99.9	13.2097	0.0004	0	13.2097
1064	VTYVPAQEKNF	Sequence	VTYVPAQEF	VTYVPAQEKNF	0.0086	-99.9	14.2113	751	LLLQYGSF	LLLQYG-SF	LLLQYGSF	0.0005	-99.9	13.2419	0.0323	0	5.2585
203	YSKHTPINLV	Sequence	YKHTPINLV	YSKHTPINLV	0.0086	-99.9	14.217	586	ITPCSFGGV	ITPCSFGGV	ITPCSFGGV	0.0005	-99.9	13.2581	0.0003	0	13.2581
1179	QKEIDRLNEV	Sequence	QEIDRLNEV	QKEIDRLNEV	0.0086	-99.9	14.2291	493	SYGFQPTNGV	SYFQPTNGV	SYGFQPTNGV	0.0005	-99.9	13.2742	0.002	0	13.2742
642	FQTRAGCL	Sequence	FQTRAGC-L	FQTRAGCL	0.0085	-99.9	14.2577	268	YLQPRTFLLK	YLQPRTLLK	YLQPRTFLLK	0.0005	-99.9	13.2903	0.0012	0	13.2903
92	ASTEKSNII	Sequence	ASTEKSNII	ASTEKSNII	0.0085	-99.9	14.2705	119	VNNATNVVI	VNNATNVVI	VNNATNVVI	0.0005	-99.9	13.3065	0.0328	0	5.2143
1128	VIGIVNNTV	Sequence	VIGIVNNTV	VIGIVNNTV	0.0085	-99.9	14.2705	413	QTGKIADY	QT-GKIADY	QTGKIADY	0.0005	-99.9	13.3065	0.0067	0	11.9414
26	AYTNSFTRGVY	Sequence	AYTNSFTVY	AYTNSFTRGVY	0.0085	-99.9	14.2705	122	ATNVVIKVC	ATNVVIKVC	ATNVVIKVC	0.0005	-99.9	13.3226	0.0012	0	13.3226
538	VNFNFNGL	Sequence	VNF-NFNGL	VNFNFNGL	0.0084	-99.9	14.3355	102	GWIFGTTL	GWI-FGTTL	GWIFGTTL	0.0005	-99.9	13.371	0.0035	0	13.371
1108	FYEPQIITT	Sequence	FYEPQIITT	FYEPQIITT	0.0084	-99.9	14.3833	814	RSFIEDLL	RSF-IEDLL	RSFIEDLL	0.0005	-99.9	13.371	0.0029	0	13.371
859	VLPPLLTDEM	Sequence	VLPPLLTEM	VLPPLLTDEM	0.0084	-99.9	14.3862	791	PPIKDFGGF	PPIKDFGGF	PPIKDFGGF	0.0005	-99.9	13.3871	0.0068	0	11.9008
47	LHSTQDLF	Sequence	LHS-TQDLF	LHSTQDLF	0.0083	-99.9	14.4019	91	FASTEKSNII	FASEKSNII	FASTEKSNII	0.0005	-99.9	13.4032	0.0005	0	13.4032
61	VTWFHAIHV	Sequence	VTWFHAIHV	VTWFHAIHV	0.0083	-99.9	14.444	1131	IVNNTVYDPL	IVNNTVDPL	IVNNTVYDPL	0.0005	-99.9	13.4516	0.001	0	13.4516
1200	QELGKYEQYI	Sequence	QELGKYEQY	QELGKYEQY	0.0083	-99.9	14.4582	95	EKSNIIRGW	EKSNIIRGW	EKSNIIRGW	0.0005	-99.9	13.4677	0.03	0	5.4872
663	IPIGAGICA	Sequence	IPIGAGICA	IPIGAGICA	0.0082	-99.9	14.4761	33	RGVYYPDKV	RGVYYPDKV	RGVYYPDKV	0.0005	-99.9	13.4839	0.0041	0	13.4839
481	GVEGFNCY	Sequence	GV-EGFNCY	GVEGFNCY	0.0082	-99.9	14.5025	1046	YHLMSFPQSA	YLMSFPQSA	YHLMSFPQSA	0.0005	-99.9	13.5161	0.0052	0	13.36
145	HKNNKSWM	Sequence	HKNNKSW-M	HKNNKSWM	0.0082	-99.9	14.5032	137	DPFLGVYYH	DPFLGVYYH	DPFLGVYYH	0.0005	-99.9	13.5161	0.0018	0	13.5161
222	LEPLVDLPI	Sequence	LEPLVDLPI	LEPLVDLPI	0.0082	-99.9	14.5296	868	MIAQYTSA	MIAQYTSA-	MIAQYTSA	0.0005	-99.9	13.5161	0.0007	0	13.5161
394	VYADSFVIR	Sequence	VYADSFVIR	VYADSFVIR	0.0081	-99.9	14.5439	368	YNSASFSTFK	YSASFSTFK	YNSASFSTFK	0.0005	-99.9	13.5806	0.0079	0	11.0391
464	ERDISTEI	Sequence	ERD-ISTEI	ERDISTEI	0.0081	-99.9	14.5917	887	FGAGAALQIPF	FGAGAALQF	FGAGAALQIPF	0.0005	-99.9	13.5968	0.0019	0	13.5968
47	LHSTQDLFLPF	Sequence	LHSDLFLPF	LHSTQDLFLPF	0.008	-99.9	14.6652	340	VFNATRFASVY	VFNATASVY	VFNATRFASVY	0.0005	-99.9	13.6129	0.0029	0	13.6129
1069	AQEKNFTTAP	Sequence	AQKNFTTAP	AQEKNFTTAP	0.0079	-99.9	14.7009	135	CNDPFLGVY	CNDPFLGVY	CNDPFLGVY	0.0005	-99.9	13.629	0.0189	0	7.1488
1004	QTYVTQQL	Sequence	QTY-VTQQL	QTYVTQQL	0.0079	-99.9	14.7052	970	GAISSVLNDI	GAISSVLNI	GAISSVLNDI	0.0005	-99.9	13.6452	0.0015	0	13.6452
228	LPIGINITR	Sequence	LPIGINITR	LPIGINITR	0.0079	-99.9	14.7123	390	CFTNVYADSF	FTNVYADSF	FTNVYADSF	0.0005	-99.9	13.6452	0.0012	0	13.6452
476	STPCNGVEGF	Sequence	STCNGVEGF	STPCNGVEGF	0.0079	-99.9	14.7195	317	FRVQPTESIV	FVQPTESIV	FRVQPTESIV	0.0005	-99.9	13.6613	0.0103	0	9.7111
441	DSKVGGNY	Sequence	DSK-VGGNY	DSKVGGNY	0.0079	-99.9	14.7238	441	DSKVGGNY	DSK-VGGNY	DSKVGGNY	0.0005	-99.9	13.6613	0.0042	0	13.6613
159	YSSANNCTFEY	Sequence	YSSANNFEY	YSSANNCTFEY	0.0079	-99.9	14.7445	792	PIKDFGGFNF	PIKDGGFNF	PIKDFGGFNF	0.0005	-99.9	13.6774	0.013	0	8.6704
651	GAEHVNNSYE	Sequence	GAEHVNNSY	GAEHVNNSY	0.0079	-99.9	14.7488	924	NQFNSAIGKI	NQFNSAIKI	NQFNSAIGKI	0.0005	-99.9	13.6935	0.0171	0	7.5203
166	TFEYVSQPFL	Sequence	TEYVSQPFL	TFEYVSQPFL	0.0078	-99.9	14.7702	1002	SLQTYVTQQ	SLQTYVTQQ	SLQTYVTQQ	0.0005	-99.9	13.7097	0.002	0	13.7097
883	SGWTFGAGAAL	Sequence	STFGAGAAL	SGWTFGAGAAL	0.0078	-99.9	14.8059	200	FKIYSKHTPI	FIYSKHTPI	FKIYSKHTPI	0.0005	-99.9	13.7258	0.0071	0	11.6097
1129	IGIVNNTVYD	Sequence	IGIVNNTVY	IGIVNNTVY	0.0078	-99.9	14.8108	619	VPVAIHADQL	VVAIHADQL	VPVAIHADQL	0.0005	-99.9	13.7258	0.0007	0	13.7258
955	AQALNTLVKQ	Sequence	AQALNTLVQ	AQALNTLVKQ	0.0077	-99.9	14.8365	988	AEVQIDRLI	AEVQIDRLI	AEVQIDRLI	0.0005	-99.9	13.7419	0.068	0	3.22
33	RGVYYPDKV	Sequence	RGVYYPDKV	RGVYYPDKV	0.0077	-99.9	14.8608	990	VQIDRLITGRL	VQIDRLITL	VQIDRLITGRL	0.0005	-99.9	13.7581	0.0222	0	6.5144
184	NFKNLREF	Sequence	N-FKNLREF	NFKNLREF	0.0077	-99.9	14.8901	407	RQIAPGQTGKI	RQIAPGQTI	RQIAPGQTGKI	0.0005	-99.9	13.7742	0.1228	1	1.8825
1207	QYIKWPWY	Sequence	#NAME?	QYIKWPWY	0.0077	-99.9	14.8922	843	IAARDLICA	IAARDLICA	IAARDLICA	0.0005	-99.9	13.7903	0.0009	0	13.7903
81	PVLPFNDGVY	Sequence	PVLPNDGVY	PVLPFNDGVY	0.0076	-99.9	14.9122	692	IAYTMSLG	IAYTMSLG-	IAYTMSLG	0.0005	-99.9	13.8065	0.0004	0	13.8065
472	YQAGSTPCN	Sequence	YQAGSTPCN	YQAGSTPCN	0.0076	-99.9	14.9529	219	FSALEPLV	FSALEPLV-	FSALEPLV	0.0005	-99.9	13.8065	0.0004	0	13.8065
993	DRLITGRL	Sequence	DRLITGR-L	DRLITGRL	0.0075	-99.9	14.9693	691	IIAYTMSLG	IIAYTMSLG	IIAYTMSLG	0.0005	-99.9	13.8226	0.0003	0	13.8226
162	ANNCTFEY	Sequence	ANNCTF-EY	ANNCTFEY	0.0075	-99.9	14.9714	453	RLFRKSNL	RLF-RKSNL	RLFRKSNL	0.0005	-99.9	13.871	0.007	0	11.7412
883	SGWTFGAGA	Sequence	SGWTFGAGA	SGWTFGAGA	0.0075	-99.9	14.9779	54	FLPFFSNV	FLP-FFSNV	FLPFFSNV	0.0005	-99.9	13.871	0.0004	0	13.871
1183	DRLNEVAKNL	Sequence	DRLNEVAKL	DRLNEVAKNL	0.0075	-99.9	14.9829	965	LSSNFGAIS	LSSNFGAIS	LSSNFGAIS	0.0004	-99.9	13.8871	0.0006	0	13.8871
1041	FCGKGYHLM	Sequence	FCGKGYHLM	FCGKGYHLM	0.0075	-99.9	14.985	359	NCVADYSVL	NCVADYSVL	NCVADYSVL	0.0004	-99.9	13.9194	0.0024	0	13.9194
623	IHADQLTPT	Sequence	IHADQLTPT	IHADQLTPT	0.0075	-99.9	15.009	954	NAQALNTL	NAQ-ALNTL	NAQALNTL	0.0004	-99.9	13.9194	0.0013	0	13.9194
35	VYYPDKVFR	Sequence	VYYPDKVFR	VYYPDKVFR	0.0075	-99.9	15.0387	181	KQGNFKNLREF	KQFKNLREF	KQGNFKNLREF	0.0004	-99.9	13.9516	0.1558	1	1.4025
684	RSVASQSI	Sequence	RSV-ASQSI	RSVASQSI	0.0075	-99.9	15.0405	337	FGEVFNATR	FGEVFNATR	FGEVFNATR	0.0004	-99.9	13.9516	0.0007	0	13.9516
205	KHTPINLVRDL	Sequence	KHTPINLVL	KHTPINLVRDL	0.0074	-99.9	15.0801	1129	IGIVNNTVYD	IGIVNNTVY	IGIVNNTVY	0.0004	-99.9	13.9677	0.0041	0	13.9677
350	YAWNRKRIS	Sequence	YAWNRKRIS	YAWNRKRIS	0.0074	-99.9	15.1179	400	VIRGDEVRQI	VIRGDVRQI	VIRGDEVRQI	0.0004	-99.9	13.9839	0.0034	0	13.9839
482	VEGFNCYFPL	Sequence	VEFNCYFPL	VEGFNCYFPL	0.0074	-99.9	15.1341	625	ADQLTPTWRVY	ALTPTWRVY	ADQLTPTWRVY	0.0004	-99.9	14	0.0075	0	11.3482
789	KTPPIKDFGGF	Sequence	KTIKDFGGF	KTPPIKDFGGF	0.0073	-99.9	15.1485	971	AISSVLNDIL	AISSVLNIL	AISSVLNDIL	0.0004	-99.9	14	0.0007	0	14
1180	KEIDRLNEVAK	Sequence	KEIDRLVAK	KEIDRLNEVAK	0.0073	-99.9	15.1494	424	LPDDFTGCV	LPDDFTGCV	LPDDFTGCV	0.0004	-99.9	14.0408	0.0008	0	14.0408
877	LAGTITSGWTF	Sequence	LAITSGWTF	LAGTITSGWTF	0.0073	-99.9	15.1728	294	PLSETKCTL	PLSETKCTL	PLSETKCTL	0.0004	-99.9	14.0408	0.0008	0	14.0408
706	YSNNSIAI	Sequence	YSN-NSIAI	YSNNSIAI	0.0073	-99.9	15.1737	167	FEYVSQPF	FEY-VSQPF	FEYVSQPF	0.0004	-99.9	14.0612	0.1486	1	1.503
1203	GKYEQYIKWPW	Sequence	GKYEQYIKW	GKYEQYIKWPW	0.0072	-99.9	15.2592	679	SPRRARSVA	SPRRARSVA	SPRRARSVA	0.0004	-99.9	14.0816	0.0021	0	14.0816
317	FRVQPTES	Sequence	FRVQPTES-	FRVQPTES	0.0071	-99.9	15.3213	921	LIANQFNSAI	LIANQNSAI	LIANQFNSAI	0.0004	-99.9	14.0816	0.0008	0	14.0816
1061	FLHVTYVPA	Sequence	FLHVTYVPA	FLHVTYVPA	0.0071	-99.9	15.3312	260	GAAAYYVGYL	GAAAYVGYL	GAAAYYVGYL	0.0004	-99.9	14.1837	0.002	0	14.1837
575	VRDPQTLE	Sequence	VRDPQTLE-	VRDPQTLE	0.0071	-99.9	15.3546	99	IIRGWIFGTTL	IIRGFGTTL	IIRGWIFGTTL	0.0004	-99.9	14.1837	0.0011	0	14.1837
142	VYYHKNNKSW	Sequence	VYYKNNKSW	VYYHKNNKSW	0.0071	-99.9	15.3879	224	PLVDLPIGI	PLVDLPIGI	PLVDLPIGI	0.0004	-99.9	14.1837	0.001	0	14.1837
262	AAYYVGYLQ	Sequence	AAYYVGYLQ	AAYYVGYLQ	0.0071	-99.9	15.3951	34	GVYYPDKV	GVY-YPDKV	GVYYPDKV	0.0004	-99.9	14.1837	0.0009	0	14.1837
632	WRVYSTGSNV	Sequence	WRYSTGSNV	WRVYSTGSNV	0.0071	-99.9	15.3978	552	TESNKKFLPF	TSNKKFLPF	TESNKKFLPF	0.0004	-99.9	14.2653	0.0474	0	4.0919
1064	VTYVPAQEK	Sequence	VTYVPAQEK	VTYVPAQEK	0.0071	-99.9	15.4005	684	RSVASQSI	RSV-ASQSI	RSVASQSI	0.0004	-99.9	14.3061	0.0039	0	14.3061
778	QEVFAQVKQI	Sequence	QEFAQVKQI	QEVFAQVKQI	0.007	-99.9	15.4194	377	KCYGVSPTK	KCYGVSPTK	KCYGVSPTK	0.0004	-99.9	14.3061	0.0019	0	14.3061
1182	IDRLNEVAK	Sequence	IDRLNEVAK	IDRLNEVAK	0.007	-99.9	15.4329	728	VSMTKTSV	VSM-TKTSV	VSMTKTSV	0.0004	-99.9	14.3061	0.0012	0	14.3061
239	TLLALHRSYL	Sequence	TLLALHRSY	TLLALHRSY	0.007	-99.9	15.4806	46	VLHSTQDLFL	VLHSTQDLL	VLHSTQDLFL	0.0004	-99.9	14.3265	0.0021	0	14.3265
1199	LQELGKYEQ	Sequence	LQELGKYEQ	LQELGKYEQ	0.007	-99.9	15.4941	857	LTVLPPLL	LTVLPPL-L	LTVLPPLL	0.0004	-99.9	14.3469	0.0007	0	14.3469
278	YNENGTITDA	Sequence	YENGTITDA	YNENGTITDA	0.0069	-99.9	15.495	100	IRGWIFGTTL	IRWIFGTTL	IRGWIFGTTL	0.0004	-99.9	14.3673	0.0425	0	4.3929
1070	QEKNFTTA	Sequence	QEKNF-TTA	QEKNFTTA	0.0069	-99.9	15.4977	22	QLPPAYTNS	QLPPAYTNS	QLPPAYTNS	0.0004	-99.9	14.3673	0.0005	0	14.3673
972	ISSVLNDIL	Sequence	ISSVLNDIL	ISSVLNDIL	0.0069	-99.9	15.4995	723	TEILPVSMTK	TILPVSMTK	TEILPVSMTK	0.0004	-99.9	14.3878	0.0126	0	8.8232
746	TECSNLLL	Sequence	TEC-SNLLL	TECSNLLL	0.0069	-99.9	15.5167	36	YYPDKVFRS	YYPDKVFRS	YYPDKVFRS	0.0004	-99.9	14.4082	0.001	0	14.4082
117	LIVNNATNV	Sequence	LIVNNATNV	LIVNNATNV	0.0069	-99.9	15.5176	201	KIYSKHTPINL	KIYSTPINL	KIYSKHTPINL	0.0004	-99.9	14.4082	0.0006	0	14.4082
659	YECDIPIGAGI	Sequence	YEIPIGAGI	YECDIPIGAGI	0.0069	-99.9	15.5338	78	FDNPVLPF	F-DNPVLPF	FDNPVLPF	0.0004	-99.9	14.449	0.03	0	5.4869
869	IAQYTSAL	Sequence	IAQ-YTSAL	IAQYTSAL	0.0068	-99.9	15.5905	348	SVYAWNRKRI	SVYANRKRI	SVYAWNRKRI	0.0004	-99.9	14.5102	0.0008	0	14.5102
147	NNKSWMESEF	Sequence	NKSWMESEF	NNKSWMESEF	0.0068	-99.9	15.6139	959	NTLVKQLSSNF	NTLVKQLSF	NTLVKQLSSNF	0.0004	-99.9	14.5306	0.0006	0	14.5306
562	QQFGRDIADT	Sequence	QQFGRDIAT	QQFGRDIADT	0.0068	-99.9	15.6445	906	NGIGVTQNVL	NGIGTQNVL	NGIGVTQNVL	0.0004	-99.9	14.551	0.0011	0	14.551
1047	HLMSFPQS	Sequence	HLMSFPQS-	HLMSFPQS	0.0068	-99.9	15.658	377	KCYGVSPTKL	KCYGSPTKL	KCYGVSPTKL	0.0004	-99.9	14.5714	0.0028	0	14.5714
1219	FIAGLIAIV	Sequence	FIAGLIAIV	FIAGLIAIV	0.0068	-99.9	15.6634	1198	DLQELGKYEQY	DLQELGKYY	DLQELGKYEQY	0.0004	-99.9	14.5918	0.0018	0	14.5918
794	KDFGGFNFS	Sequence	KDFGGFNFS	KDFGGFNFS	0.0067	-99.9	15.6823	347	ASVYAWNRK	ASVYAWNRK	ASVYAWNRK	0.0004	-99.9	14.6122	0.0005	0	14.6122
1206	EQYIKWPW	Sequence	EQY-IKWPW	EQYIKWPW	0.0067	-99.9	15.6994	825	VTLADAGFIK	VTADAGFIK	VTLADAGFIK	0.0004	-99.9	14.6327	0.0004	0	14.6327
1166	GDISGINASV	Sequence	GDISGINSV	GDISGINASV	0.0067	-99.9	15.7219	916	YENQKLIANQF	YQKLIANQF	YENQKLIANQF	0.0004	-99.9	14.6531	0.0631	0	3.3964
307	VEKGIYQT	Sequence	VEKGIYQT-	VEKGIYQT	0.0067	-99.9	15.7642	1009	QQLIRAAEI	QQLIRAAEI	QQLIRAAEI	0.0004	-99.9	14.6531	0.0622	0	3.4304
721	VTTEILPVSM	Sequence	VTTEIPVSM	VTTEILPVSM	0.0066	-99.9	15.7957	349	VYAWNRKRI	VYAWNRKRI	VYAWNRKRI	0.0004	-99.9	14.6735	0.0009	0	14.6735
343	ATRFASVYA	Sequence	ATRFASVYA	ATRFASVYA	0.0066	-99.9	15.829	136	NDPFLGVYY	NDPFLGVYY	NDPFLGVYY	0.0004	-99.9	14.6939	0.0302	0	5.4699
469	TEIYQAGST	Sequence	TEIYQAGST	TEIYQAGST	0.0066	-99.9	15.8317	80	NPVLPFNDGVY	NPVLPFNVY	NPVLPFNDGVY	0.0004	-99.9	14.6939	0.0019	0	14.6939
236	RFQTLLALH	Sequence	RFQTLLALH	RFQTLLALH	0.0066	-99.9	15.8344	1256	DEDDSEPVL	DEDDSEPVL	DEDDSEPVL	0.0004	-99.9	14.7143	0.0109	0	9.4479
697	SLGAENSVA	Sequence	SLGAENSVA	SLGAENSVA	0.0066	-99.9	15.8398	350	YAWNRKRI	YAW-NRKRI	YAWNRKRI	0.0004	-99.9	14.7551	0.0012	0	14.7551
102	GWIFGTTL	Sequence	GWI-FGTTL	GWIFGTTL	0.0065	-99.9	15.8578	615	NCTEVPVAI	NCTEVPVAI	NCTEVPVAI	0.0004	-99.9	14.7551	0.0009	0	14.7551
625	ADQLTPTW	Sequence	ADQ-LTPTW	ADQLTPTW	0.0065	-99.9	15.9262	1107	NFYEPQIIT	NFYEPQIIT	NFYEPQIIT	0.0004	-99.9	14.8163	0.0027	0	14.8163
57	FFSNVTWF	Sequence	F-FSNVTWF	FFSNVTWF	0.0065	-99.9	15.9289	489	FPLQSYGF	FPLQS-YGF	FPLQSYGF	0.0004	-99.9	14.8367	0.0026	0	14.8367
1015	AEIRASANLAA	Sequence	AEISANLAA	AEIRASANLAA	0.0065	-99.9	15.9406	81	PVLPFNDGVYF	PVFNDGVYF	PVLPFNDGVYF	0.0004	-99.9	14.8367	0.0024	0	14.8367
315	SNFRVQPTESI	Sequence	SRVQPTESI	SNFRVQPTESI	0.0065	-99.9	15.9442	264	YYVGYLQPR	YYVGYLQPR	YYVGYLQPR	0.0004	-99.9	14.8367	0.0006	0	14.8367
649	LIGAEHVNNSY	Sequence	LAEHVNNSY	LIGAEHVNNSY	0.0064	-99.9	15.9541	505	QPYRVVVLS	QPYRVVVLS	QPYRVVVLS	0.0004	-99.9	14.8571	0.0005	0	14.8571
154	SEFRVYSS	Sequence	SEFRVYSS-	SEFRVYSS	0.0064	-99.9	15.9667	954	NAQALNTLVK	NAALNTLVK	NAQALNTLVK	0.0004	-99.9	14.8776	0.001	0	14.8776
933	IQDSLSST	Sequence	IQDSLSST-	IQDSLSST	0.0064	-99.9	15.9685	894	QIPFAMQMA	QIPFAMQMA	QIPFAMQMA	0.0004	-99.9	14.898	0.0003	0	14.898
1208	YIKWPWYIWL	Sequence	YKWPWYIWL	YIKWPWYIWL	0.0064	-99.9	15.9748	756	GSFCTQLNR	GSFCTQLNR	GSFCTQLNR	0.0004	-99.9	14.898	0.0003	0	14.898
353	NRKRISNCV	Sequence	NRKRISNCV	NRKRISNCV	0.0064	-99.9	15.9811	176	MDLEGKQGNF	MLEGKQGNF	MDLEGKQGNF	0.0004	-99.9	14.9184	0.0255	0	6.0187
400	VIRGDEVRQI	Sequence	VRGDEVRQI	VIRGDEVRQI	0.0064	-99.9	15.9865	894	QIPFAMQM	#NAME?	QIPFAMQM	0.0004	-99.9	14.9592	0.0409	0	4.4903
268	YLQPRTFL	Sequence	YLQ-PRTFL	YLQPRTFL	0.0064	-99.9	15.9874	1088	FPREGVFV	FPREG-VFV	FPREGVFV	0.0004	-99.9	14.9796	0.0007	0	14.9796
413	QTGKIADYNY	Sequence	QGKIADYNY	QTGKIADYNY	0.0064	-99.9	16.0357	636	STGSNVFQTR	STSNVFQTR	STGSNVFQTR	0.0004	-99.9	15.0233	0.0003	0	15.0233
942	SALGKLQDV	Sequence	SALGKLQDV	SALGKLQDV	0.0063	-99.9	16.0454	391	FTNVYADSFV	FTNVYADSF	FTNVYADSF	0.0004	-99.9	15.0698	0.0004	0	15.0698
867	EMIAQYTSAL	Sequence	EMIAQTSAL	EMIAQYTSAL	0.0063	-99.9	16.067	203	YSKHTPINLVR	YSTPINLVR	YSKHTPINLVR	0.0004	-99.9	15.1163	0.0003	0	15.1163
318	RVQPTESI	Sequence	RVQ-PTESI	RVQPTESI	0.0063	-99.9	16.0714	1018	RASANLAA	RASANLAA-	RASANLAA	0.0004	-99.9	15.1395	0.0028	0	15.1395
1109	YEPQIITTD	Sequence	YEPQIITTD	YEPQIITTD	0.0063	-99.9	16.0735	231	GINITRFQTL	GINITRQTL	GINITRFQTL	0.0004	-99.9	15.1395	0.0019	0	15.1395
807	DPSKPSKRSF	Sequence	DSKPSKRSF	DPSKPSKRSF	0.0063	-99.9	16.0811	844	AARDLICA	AARDLICA-	AARDLICA	0.0004	-99.9	15.2093	0.0007	0	15.2093
269	LQPRTFLLK	Sequence	LQPRTFLLK	LQPRTFLLK	0.0063	-99.9	16.1016	501	GVGYQPYRV	GVGYQPYRV	GVGYQPYRV	0.0004	-99.9	15.2326	0.0007	0	15.2326
892	ALQIPFAMQMA	Sequence	AQIPFAMQM	ALQIPFAMQM	0.0063	-99.9	16.1016	59	SNVTWFHAI	SNVTWFHAI	SNVTWFHAI	0.0004	-99.9	15.2558	0.0195	0	7.0152
123	TNVVIKVCEF	Sequence	TNVVIKVEF	TNVVIKVCEF	0.0063	-99.9	16.147	675	TQTNSPRRAR	TTNSPRRAR	TQTNSPRRAR	0.0004	-99.9	15.2558	0.0018	0	15.2558
418	ADYNYKLPDDF	Sequence	ADYNYKLPF	ADYNYKLPDDF	0.0062	-99.9	16.1568	685	SVASQSII	SVA-SQSII	SVASQSII	0.0004	-99.9	15.2558	0.0005	0	15.2558
196	IDGYFKIY	Sequence	ID-GYFKIY	IDGYFKIY	0.0062	-99.9	16.1665	144	YHKNNKSW	YHK-NNKSW	YHKNNKSW	0.0004	-99.9	15.3023	0.0076	0	11.2663
291	ALDPLSETK	Sequence	ALDPLSETK	ALDPLSETK	0.0062	-99.9	16.2076	883	SGWTFGAGA	SGWTFGAGA	SGWTFGAGA	0.0004	-99.9	15.3023	0.004	0	14.9779
896	PFAMQMAY	Sequence	#NAME?	PFAMQMAY	0.0062	-99.9	16.2086	702	NSVAYSNNSI	NVAYSNNSI	NSVAYSNNSI	0.0004	-99.9	15.3023	0.0004	0	15.3023
94	TEKSNIIRG	Sequence	TEKSNIIRG	TEKSNIIRG	0.0062	-99.9	16.2454	148	NKSWMESEF	NKSWMESEF	NKSWMESEF	0.0004	-99.9	15.3256	0.1001	0	2.3326
207	TPINLVRDL	Sequence	TPINLVRDL	TPINLVRDL	0.0062	-99.9	16.2541	193	FKNIDGYFKIY	FIDGYFKIY	FKNIDGYFKIY	0.0004	-99.9	15.3256	0.0357	0	4.9276
906	NGIGVTQNV	Sequence	NGIGVTQNV	NGIGVTQNV	0.0061	-99.9	16.3622	956	QALNTLVKQL	QALNTLVQL	QALNTLVKQL	0.0004	-99.9	15.3256	0.0007	0	15.3256
21	TQLPPAYTNS	Sequence	TQLPPAYTS	TQLPPAYTNS	0.006	-99.9	16.4335	497	QPTNGVGY	QPT-NGVGY	QPTNGVGY	0.0004	-99.9	15.3721	0.0127	0	8.7801
205	KHTPINLV	Sequence	KHTPINLV-	KHTPINLV	0.006	-99.9	16.4595	943	ALGKLQDVV	ALGKLQDVV	ALGKLQDVV	0.0004	-99.9	15.3721	0.0023	0	15.3721
1112	QIITTDNTFV	Sequence	QIITTDNTF	QIITTDNTF	0.006	-99.9	16.4616	385	KLNDLCFTNV	KLNDLFTNV	KLNDLCFTNV	0.0004	-99.9	15.3721	0.0006	0	15.3721
911	TQNVLYENQ	Sequence	TQNVLYENQ	TQNVLYENQ	0.0059	-99.9	16.4789	628	LTPTWRVYS	LTPTWRVYS	LTPTWRVYS	0.0004	-99.9	15.3721	0.0002	0	15.3721
713	IPTNFTISV	Sequence	IPTNFTISV	IPTNFTISV	0.0059	-99.9	16.4908	241	LALHRSYL	LAL-HRSYL	LALHRSYL	0.0004	-99.9	15.3954	0.0009	0	15.3954
1000	LQSLQTYV	Sequence	LQSLQTYV-	LQSLQTYV	0.0059	-99.9	16.493	1001	QSLQTYVTQ	QSLQTYVTQ	QSLQTYVTQ	0.0004	-99.9	15.3954	0.0008	0	15.3954
720	SVTTEILPV	Sequence	SVTTEILPV	SVTTEILPV	0.0059	-99.9	16.5092	1016	EIRASANLA	EIRASANLA	EIRASANLA	0.0004	-99.9	15.4186	0.0004	0	15.4186
271	PRTFLLKY	Sequence	PRT-FLLKY	PRTFLLKY	0.0059	-99.9	16.5384	823	NKVTLADAGF	NVTLADAGF	NKVTLADAGF	0.0004	-99.9	15.4419	0.0189	0	7.1411
415	GKIADYNYK	Sequence	GKIADYNYK	GKIADYNYK	0.0059	-99.9	16.5449	327	RFPNITNLCPF	RFPNITNLF	RFPNITNLCPF	0.0004	-99.9	15.4419	0.003	0	15.4419
718	TISVTTEIL	Sequence	TISVTTEIL	TISVTTEIL	0.0059	-99.9	16.5535	26	AYTNSFTRGVY	YTNSTRGVY	YTNSFTRGVY	0.0004	-99.9	15.5116	0.0044	0	14.2705
181	KQGNFKNLR	Sequence	KQGNFKNLR	KQGNFKNLR	0.0059	-99.9	16.5535	37	YPDKVFRSSV	YPDKVRSSV	YPDKVFRSSV	0.0004	-99.9	15.5116	0.0005	0	15.5116
1088	FPREGVFVS	Sequence	FPREGVFVS	FPREGVFVS	0.0058	-99.9	16.5946	193	FKNIDGYF	F-KNIDGYF	FKNIDGYF	0.0004	-99.9	15.5581	0.0909	0	2.5362
277	KYNENGTIT	Sequence	KYNENGTIT	KYNENGTIT	0.0058	-99.9	16.5978	514	FELLHAPATV	FLLHAPATV	FELLHAPATV	0.0004	-99.9	15.5814	0.0068	0	11.79
189	REFVFKNID	Sequence	REFVFKNID	REFVFKNID	0.0058	-99.9	16.6011	122	ATNVVIKVCEF	ATNVVIKEF	ATNVVIKVCEF	0.0004	-99.9	15.5814	0.0012	0	15.5814
761	QLNRALTGI	Sequence	QLNRALTGI	QLNRALTGI	0.0058	-99.9	16.6411	1169	SGINASVVNI	SINASVVNI	SGINASVVNI	0.0004	-99.9	15.6512	0.0012	0	15.6512
183	GNFKNLREFV	Sequence	GNFKNLREF	GNFKNLREF	0.0058	-99.9	16.6822	246	SYLTPGDSS	SYLTPGDSS	SYLTPGDSS	0.0004	-99.9	15.6512	0.0009	0	15.6512
801	FSQILPDPSK	Sequence	FQILPDPSK	FSQILPDPSK	0.0057	-99.9	16.7124	987	EAEVQIDRL	EAEVQIDRL	EAEVQIDRL	0.0004	-99.9	15.6512	0.0007	0	15.6512
1254	KFDEDDSEPVL	Sequence	KEDDSEPVL	KFDEDDSEPVL	0.0057	-99.9	16.7243	89	VYFASTEKS	VYFASTEKS	VYFASTEKS	0.0004	-99.9	15.6977	0.0014	0	15.6977
945	GKLQDVVNQ	Sequence	GKLQDVVNQ	GKLQDVVNQ	0.0057	-99.9	16.7286	525	GPKKSTNLV	GPKKSTNLV	GPKKSTNLV	0.0004	-99.9	15.6977	0.0014	0	15.6977
1104	TQRNFYEPQII	Sequence	TQFYEPQII	TQRNFYEPQII	0.0057	-99.9	16.7459	191	FVFKNIDGYFK	FVFKNIDGY	FVFKNIDGY	0.0004	-99.9	15.6977	0.0004	0	15.6977
372	SFSTFKCY	Sequence	S-FSTFKCY	SFSTFKCY	0.0057	-99.9	16.7654	901	MAYRFNGIG	MAYRFNGIG	MAYRFNGIG	0.0004	-99.9	15.7209	0.0019	0	15.7209
873	TSALLAGTI	Sequence	TSALLAGTI	TSALLAGTI	0.0057	-99.9	16.7751	503	GYQPYRVVVL	YQPYRVVVL	YQPYRVVVL	0.0004	-99.9	15.7442	0.005	0	13.5646
1196	LIDLQELGKY	Sequence	LDLQELGKY	LIDLQELGKY	0.0057	-99.9	16.7816	1225	AIVMVTIM	AIV-MVTIM	AIVMVTIM	0.0004	-99.9	15.7442	0.0022	0	15.7442
91	FASTEKSNI	Sequence	FASTEKSNI	FASTEKSNI	0.0057	-99.9	16.7892	392	TNVYADSFVI	TVYADSFVI	TNVYADSFVI	0.0004	-99.9	15.7674	0.0016	0	15.7674
327	RFPNITNLCPF	Sequence	RNITNLCPF	RFPNITNLCPF	0.0056	-99.9	16.84	254	SSGWTAGAAA	SSWTAGAAA	SSGWTAGAAA	0.0004	-99.9	15.7674	0.0013	0	15.7674
1203	GKYEQYIKWP	Sequence	GKYEQYIKW	GKYEQYIKW	0.0056	-99.9	16.8595	917	ENQKLIANQF	EQKLIANQF	ENQKLIANQF	0.0004	-99.9	15.7907	0.0398	0	4.5815
595	SVITPGTNT	Sequence	SVITPGTNT	SVITPGTNT	0.0056	-99.9	16.88	206	HTPINLVR	HT-PINLVR	HTPINLVR	0.0004	-99.9	15.7907	0.0003	0	15.7907
510	VVLSFELLH	Sequence	VVLSFELLH	VVLSFELLH	0.0055	-99.9	16.9211	120	NNATNVVIK	NNATNVVIK	NNATNVVIK	0.0004	-99.9	15.814	0.0004	0	15.814
409	IAPGQTGKI	Sequence	IAPGQTGKI	IAPGQTGKI	0.0055	-99.9	16.933	935	DSLSSTASA	DSLSSTASA	DSLSSTASA	0.0004	-99.9	15.8372	0.0011	0	15.8372
709	NSIAIPTNFT	Sequence	NSIAIPTNF	NSIAIPTNF	0.0055	-99.9	16.9427	621	VAIHADQLT	VAIHADQLT	VAIHADQLT	0.0004	-99.9	15.8372	0.0008	0	15.8372
1198	DLQELGKY	Sequence	DLQELG-KY	DLQELGKY	0.0055	-99.9	16.9438	651	GAEHVNNSYE	GAEHVNNSY	GAEHVNNSY	0.0004	-99.9	15.8605	0.0041	0	14.7488
809	SKPSKRSFI	Sequence	SKPSKRSFI	SKPSKRSFI	0.0055	-99.9	16.9697	961	LVKQLSSNFG	LVKQLSSNF	LVKQLSSNF	0.0004	-99.9	15.8605	0.0009	0	15.8605
920	KLIANQFNSA	Sequence	KLIANFNSA	KLIANQFNSA	0.0055	-99.9	16.9827	694	YTMSLGAENSV	YTMSLGNSV	YTMSLGAENSV	0.0004	-99.9	15.8605	0.0003	0	15.8605
813	KRSFIEDL	Sequence	KRS-FIEDL	KRSFIEDL	0.0055	-99.9	16.9989	1200	QELGKYEQY	QELGKYEQY	QELGKYEQY	0.0004	-99.9	15.8837	0.2524	1	0.7349
107	TTLDSKTQSL	Sequence	TTLDSTQSL	TTLDSKTQSL	0.0054	-99.9	17.027	740	YICGDSTEC	YICGDSTEC	YICGDSTEC	0.0004	-99.9	15.8837	0.0004	0	15.8837
1008	TQQLIRAAEI	Sequence	TQQLIRAAI	TQQLIRAAEI	0.0054	-99.9	17.0405	236	RFQTLLAL	R-FQTLLAL	RFQTLLAL	0.0004	-99.9	15.907	0.0117	0	9.1238
340	VFNATRFASVY	Sequence	VFNATRSVY	VFNATRFASVY	0.0054	-99.9	17.0554	324	SIVRFPNIT	SIVRFPNIT	SIVRFPNIT	0.0004	-99.9	15.907	0.0011	0	15.907
844	AARDLICAQ	Sequence	AARDLICAQ	AARDLICAQ	0.0054	-99.9	17.0568	885	WTFGAGAALQI	WTFGAGAAI	WTFGAGAALQI	0.0004	-99.9	15.907	0.0004	0	15.907
1261	EPVLKGVKL	Sequence	EPVLKGVKL	EPVLKGVKL	0.0054	-99.9	17.0595	212	VRDLPQGF	#NAME?	VRDLPQGF	0.0004	-99.9	15.9302	0.0519	0	3.8678
879	GTITSGWTFG	Sequence	GTITSGWTF	GTITSGWTF	0.0054	-99.9	17.0649	275	LLKYNENGTI	LLYNENGTI	LLKYNENGTI	0.0004	-99.9	15.9302	0.0072	0	11.5541
1051	FPQSAPHGV	Sequence	FPQSAPHGV	FPQSAPHGV	0.0054	-99.9	17.0811	282	GTITDAVDCAL	GTITDAVAL	GTITDAVDCAL	0.0004	-99.9	15.9302	0.0004	0	15.9302
681	RRARSVASQSI	Sequence	RRAVASQSI	RRARSVASQSI	0.0054	-99.9	17.1014	536	KCVNFNFNGL	KVNFNFNGL	KCVNFNFNGL	0.0004	-99.9	15.9535	0.0007	0	15.9535
814	RSFIEDLL	Sequence	RSFIEDL-L	RSFIEDLL	0.0054	-99.9	17.1068	549	GVLTESNKK	GVLTESNKK	GVLTESNKK	0.0004	-99.9	15.9535	0.0004	0	15.9535
12	SQCVNLTTR	Sequence	SQCVNLTTR	SQCVNLTTR	0.0054	-99.9	17.1095	685	SVASQSIIAYT	SVASQSIAY	SVASQSIIAY	0.0004	-99.9	15.9767	0.001	0	15.9767
621	VAIHADQL	Sequence	VAI-HADQL	VAIHADQL	0.0054	-99.9	17.1324	453	RLFRKSNLKPF	RLFRKSNLF	RLFRKSNLKPF	0.0004	-99.9	16	0.0165	0	7.6635
790	TPPIKDFGGF	Sequence	TPIKDFGGF	TPPIKDFGGF	0.0054	-99.9	17.1351	627	QLTPTWRVYS	QLTPTWRVY	QLTPTWRVY	0.0003	-99.9	16.0278	0.0014	0	16.0278
1143	ELDSFKEEL	Sequence	ELDSFKEEL	ELDSFKEEL	0.0053	-99.9	17.1541	69	VSGTNGTKR	VSGTNGTKR	VSGTNGTKR	0.0003	-99.9	16.0278	0.0004	0	16.0278
1018	RASANLAA	Sequence	RASAN-LAA	RASANLAA	0.0053	-99.9	17.2108	652	AEHVNNSY	#NAME?	AEHVNNSY	0.0003	-99.9	16.0833	0.2445	1	0.776
1166	GDISGINAS	Sequence	GDISGINAS	GDISGINAS	0.0053	-99.9	17.2149	981	SRLDKVEAEV	SRLDKVEAV	SRLDKVEAEV	0.0003	-99.9	16.0833	0.0098	0	9.9135
829	DAGFIKQY	Sequence	DA-GFIKQY	DAGFIKQY	0.0053	-99.9	17.2162	88	GVYFASTE	GVYFASTE-	GVYFASTE	0.0003	-99.9	16.0833	0.0005	0	16.0833
251	GDSSSGWTA	Sequence	GDSSSGWTA	GDSSSGWTA	0.0052	-99.9	17.2919	310	GIYQTSNFRV	GIYQTSNRV	GIYQTSNFRV	0.0003	-99.9	16.0833	0.0004	0	16.0833
771	VEQDKNTQE	Sequence	VEQDKNTQE	VEQDKNTQE	0.0052	-99.9	17.3135	571	TTDAVRDPQTL	TAVRDPQTL	TTDAVRDPQTL	0.0003	-99.9	16.1389	0.0004	0	16.1389
834	KQYGDCLGD	Sequence	KQYGDCLGD	KQYGDCLGD	0.0052	-99.9	17.3176	500	NGVGYQPYR	NGVGYQPYR	NGVGYQPYR	0.0003	-99.9	16.1389	0.0004	0	16.1389
487	CYFPLQSYGF	Sequence	CYFPQSYGF	CYFPLQSYGF	0.0052	-99.9	17.323	60	NVTWFHAIH	NVTWFHAIH	NVTWFHAIH	0.0003	-99.9	16.1389	0.0004	0	16.1389
211	LVRDLPQGFS	Sequence	LVRDLPQGF	LVRDLPQGF	0.0052	-99.9	17.3284	622	AIHADQLTPTW	AIHADQLTW	AIHADQLTPTW	0.0003	-99.9	16.1667	0.0024	0	16.1667
1026	TKMSECVL	Sequence	TKM-SECVL	TKMSECVL	0.0052	-99.9	17.3284	1091	EGVFVSNGTHW	GVFSNGTHW	GVFVSNGTHW	0.0003	-99.9	16.1667	0.0005	0	16.1667
44	SSVLHSTQDLF	Sequence	SLHSTQDLF	SSVLHSTQDLF	0.0052	-99.9	17.3324	1022	NLAATKMSE	NLAATKMSE	NLAATKMSE	0.0003	-99.9	16.1667	0.0004	0	16.1667
1043	GKGYHLMSFP	Sequence	GKGYHLMSF	GKGYHLMSF	0.0052	-99.9	17.3405	141	GVYYHKNNKSW	GVYKNNKSW	GVYYHKNNKSW	0.0003	-99.9	16.1944	0.0013	0	16.1944
377	KCYGVSPTKL	Sequence	KCYGSPTKL	KCYGVSPTKL	0.0052	-99.9	17.4014	721	VTTEILPVS	VTTEILPVS	VTTEILPVS	0.0003	-99.9	16.1944	0.0005	0	16.1944
229	PIGINITRF	Sequence	PIGINITRF	PIGINITRF	0.0052	-99.9	17.4149	725	ILPVSMTK	IL-PVSMTK	ILPVSMTK	0.0003	-99.9	16.3333	0.0004	0	16.3333
954	NAQALNTLV	Sequence	NAQALNTLV	NAQALNTLV	0.005	-99.9	17.5622	499	TNGVGYQPY	TNGVGYQPY	TNGVGYQPY	0.0003	-99.9	16.3889	0.0622	0	3.4268
1107	NFYEPQIIT	Sequence	NFYEPQIIT	NFYEPQIIT	0.005	-99.9	17.6095	812	SKRSFIEDLLF	SSFIEDLLF	SKRSFIEDLLF	0.0003	-99.9	16.4167	0.0536	0	3.7936
849	ICAQKFNGLTV	Sequence	IQKFNGLTV	ICAQKFNGLTV	0.005	-99.9	17.6446	1160	SPDVDLGDI	SPDVDLGDI	SPDVDLGDI	0.0003	-99.9	16.4167	0.0006	0	16.4167
1260	SEPVLKGVK	Sequence	SEPVLKGVK	SEPVLKGVK	0.005	-99.9	17.6459	254	SSGWTAGAA	SSGWTAGAA	SSGWTAGAA	0.0003	-99.9	16.4444	0.0006	0	16.4444
906	NGIGVTQNVLY	Sequence	NGIGQNVLY	NGIGVTQNVLY	0.005	-99.9	17.6824	360	CVADYSVLYN	CVADYSVLY	CVADYSVLY	0.0003	-99.9	16.4444	0.0004	0	16.4444
379	YGVSPTKL	Sequence	YGV-SPTKL	YGVSPTKL	0.005	-99.9	17.6851	1138	DPLQPELDSF	DLQPELDSF	DPLQPELDSF	0.0003	-99.9	16.5	0.0055	0	12.9973
438	NNLDSKVGGNY	Sequence	NNLDVGGNY	NNLDSKVGGNY	0.0049	-99.9	17.6959	826	TLADAGFI	TLADAGFI-	TLADAGFI	0.0003	-99.9	16.5	0.0007	0	16.5
1193	NESLIDLQEL	Sequence	NELIDLQEL	NESLIDLQEL	0.0049	-99.9	17.7041	849	ICAQKFNGL	ICAQKFNGL	ICAQKFNGL	0.0003	-99.9	16.5278	0.0015	0	16.5278
42	FRSSVLHS	Sequence	FRSSVLHS-	FRSSVLHS	0.0049	-99.9	17.7446	950	VVNQNAQALN	VVNQNAQAL	VVNQNAQAL	0.0003	-99.9	16.5556	0.0004	0	16.5556
778	QEVFAQVKQ	Sequence	QEVFAQVKQ	QEVFAQVKQ	0.0049	-99.9	17.7703	431	CVIAWNSNNL	CVIANSNNL	CVIAWNSNNL	0.0003	-99.9	16.6111	0.0003	0	16.6111
826	TLADAGFIK	Sequence	TLADAGFIK	TLADAGFIK	0.0049	-99.9	17.8135	725	ILPVSMTKT	ILPVSMTKT	ILPVSMTKT	0.0003	-99.9	16.6389	0.0006	0	16.6389
717	FTISVTTEIL	Sequence	FTISVTTEL	FTISVTTEIL	0.0048	-99.9	17.8838	801	FSQILPDPSK	FSILPDPSK	FSQILPDPSK	0.0003	-99.9	16.6667	0.003	0	16.6667
902	AYRFNGIGVT	Sequence	ARFNGIGVT	AYRFNGIGVT	0.0048	-99.9	17.9027	963	KQLSSNFGAI	KQSSNFGAI	KQLSSNFGAI	0.0003	-99.9	16.6944	0.0425	0	4.3884
644	TRAGCLIGA	Sequence	TRAGCLIGA	TRAGCLIGA	0.0048	-99.9	17.9068	727	PVSMTKTSV	PVSMTKTSV	PVSMTKTSV	0.0003	-99.9	16.6944	0.0003	0	16.6944
151	WMESEFRVYS	Sequence	WMESEFRVY	WMESEFRVY	0.0048	-99.9	17.9176	711	IAIPTNFT	IAIPTNFT-	IAIPTNFT	0.0003	-99.9	16.7222	0.0018	0	16.7222
489	FPLQSYGF	Sequence	FPLQS-YGF	FPLQSYGF	0.0047	-99.9	17.9703	703	SVAYSNNSIAI	SVANNSIAI	SVAYSNNSIAI	0.0003	-99.9	16.7222	0.0004	0	16.7222
48	HSTQDLFLPFF	Sequence	HQDLFLPFF	HSTQDLFLPFF	0.0047	-99.9	17.9959	568	IADTTDAV	IA-DTTDAV	IADTTDAV	0.0003	-99.9	16.7778	0.0006	0	16.7778
556	KKFLPFQQFGR	Sequence	KKFLPFQQF	KKFLPFQQF	0.0047	-99.9	18.0032	956	QALNTLVKQ	QALNTLVKQ	QALNTLVKQ	0.0003	-99.9	16.7778	0.0005	0	16.7778
62	TWFHAIHVS	Sequence	TWFHAIHVS	TWFHAIHVS	0.0047	-99.9	18.0128	775	KNTQEVFAQV	KTQEVFAQV	KNTQEVFAQV	0.0003	-99.9	16.7778	0.0004	0	16.7778
911	TQNVLYENQKL	Sequence	TQNYENQKL	TQNVLYENQKL	0.0047	-99.9	18.0191	558	FLPFQQFGR	FLPFQQFGR	FLPFQQFGR	0.0003	-99.9	16.7778	0.0002	0	16.7778
276	LKYNENGTIT	Sequence	LKYENGTIT	LKYNENGTIT	0.0047	-99.9	18.0239	720	SVTTEILPVSM	SVTTEPVSM	SVTTEILPVSM	0.0003	-99.9	16.8333	0.0005	0	16.8333
1095	VSNGTHWFV	Sequence	VSNGTHWFV	VSNGTHWFV	0.0047	-99.9	18.0718	678	NSPRRARSV	NSPRRARSV	NSPRRARSV	0.0003	-99.9	16.8333	0.0004	0	16.8333
1210	KWPWYIWLGF	Sequence	KPWYIWLGF	KWPWYIWLGF	0.0046	-99.9	18.2153	712	AIPTNFTIS	AIPTNFTIS	AIPTNFTIS	0.0003	-99.9	16.8333	0.0004	0	16.8333
923	ANQFNSAIGK	Sequence	AQFNSAIGK	ANQFNSAIGK	0.0046	-99.9	18.244	1048	LMSFPQSAP	LMSFPQSAP	LMSFPQSAP	0.0003	-99.9	16.8611	0.0015	0	16.8611
899	MQMAYRFN	Sequence	MQMAYRFN-	MQMAYRFN	0.0046	-99.9	18.2743	1114	ITTDNTFV	ITTDNTFV-	ITTDNTFV	0.0003	-99.9	16.8611	0.0003	0	16.8611
752	LLQYGSFCTQ	Sequence	LQYGSFCTQ	LLQYGSFCTQ	0.0045	-99.9	18.3062	1099	THWFVTQRNF	TWFVTQRNF	THWFVTQRNF	0.0003	-99.9	16.8889	0.0326	0	5.221
622	AIHADQLTPTW	Sequence	AIHADTPTW	AIHADQLTPTW	0.0045	-99.9	18.3094	370	SASFSTFKC	SASFSTFKC	SASFSTFKC	0.0003	-99.9	16.9167	0.0005	0	16.9167
802	SQILPDPSKP	Sequence	SQILPPSKP	SQILPDPSKP	0.0045	-99.9	18.327	764	RALTGIAVEQ	RALTGIAVQ	RALTGIAVEQ	0.0003	-99.9	16.9722	0.0008	0	16.9722
1123	GNCDVVIGI	Sequence	GNCDVVIGI	GNCDVVIGI	0.0045	-99.9	18.3525	1198	DLQELGKY	DLQ-ELGKY	DLQELGKY	0.0003	-99.9	17	0.0029	0	16.9438
426	DDFTGCVIAW	Sequence	DDFTGVIAW	DDFTGCVIAW	0.0045	-99.9	18.3636	780	VFAQVKQIYK	VFAQVKQIY	VFAQVKQIY	0.0003	-99.9	17	0.0018	0	17
81	PVLPFNDGVYF	Sequence	VLFNDGVYF	VLPFNDGVYF	0.0045	-99.9	18.3812	505	QPYRVVVL	QPY-RVVVL	QPYRVVVL	0.0003	-99.9	17	0.0016	0	17
681	RRARSVAS	Sequence	RRARSVAS-	RRARSVAS	0.0045	-99.9	18.4242	325	IVRFPNIT	IVRFPNIT-	IVRFPNIT	0.0003	-99.9	17	0.0009	0	17
1048	LMSFPQSAPH	Sequence	LMFPQSAPH	LMSFPQSAPH	0.0045	-99.9	18.429	711	IAIPTNFTISV	IAIPTTISV	IAIPTNFTISV	0.0003	-99.9	17	0.0006	0	17
359	NCVADYSVL	Sequence	NCVADYSVL	NCVADYSVL	0.0045	-99.9	18.4338	1006	YVTQQLIRAA	YVTQQIRAA	YVTQQLIRAA	0.0003	-99.9	17	0.0004	0	17
67	IHVSGTNGT	Sequence	IHVSGTNGT	IHVSGTNGT	0.0044	-99.9	18.4817	1023	LAATKMSECV	LAATKMSEV	LAATKMSECV	0.0003	-99.9	17.0312	0.0002	0	17.0312
358	SNCVADYSVL	Sequence	SNVADYSVL	SNCVADYSVL	0.0044	-99.9	18.4817	1223	LIAIVMVTIM	LAIVMVTIM	LIAIVMVTIM	0.0003	-99.9	17.0625	0.0013	0	17.0625
319	VQPTESIV	Sequence	VQPTESIV-	VQPTESIV	0.0044	-99.9	18.4833	601	TNTSNQVAV	TNTSNQVAV	TNTSNQVAV	0.0003	-99.9	17.0938	0.0023	0	17.0938
1037	KRVDFCGKGYH	Sequence	KRVDFGKGY	KRVDFCGKGY	0.0044	-99.9	18.4833	786	QIYKTPPI	QIYKTP-PI	QIYKTPPI	0.0003	-99.9	17.0938	0.0008	0	17.0938
498	PTNGVGYQPY	Sequence	PTNGVGQPY	PTNGVGYQPY	0.0044	-99.9	18.5247	395	YADSFVIR	YA-DSFVIR	YADSFVIR	0.0003	-99.9	17.0938	0.0006	0	17.0938
733	TSVDCTMYI	Sequence	TSVDCTMYI	TSVDCTMYI	0.0044	-99.9	18.5598	620	PVAIHADQL	PVAIHADQL	PVAIHADQL	0.0003	-99.9	17.125	0.0004	0	17.125
1204	KYEQYIKWPW	Sequence	KEQYIKWPW	KYEQYIKWPW	0.0043	-99.9	18.6348	237	FQTLLALHRSY	FQTALHRSY	FQTLLALHRSY	0.0003	-99.9	17.1562	0.0805	0	2.824
132	FQFCNDPFLGV	Sequence	FQFDPFLGV	FQFCNDPFLGV	0.0043	-99.9	18.6427	277	KYNENGTI	KYNENG-TI	KYNENGTI	0.0003	-99.9	17.1562	0.001	0	17.1562
572	TDAVRDPQTL	Sequence	TAVRDPQTL	TDAVRDPQTL	0.0043	-99.9	18.6475	891	AALQIPFAMQ	AALQIPFAM	AALQIPFAM	0.0003	-99.9	17.1875	0.0011	0	17.1875
496	FQPTNGVGYQP	Sequence	FQPTNGVGY	FQPTNGVGY	0.0043	-99.9	18.673	594	VSVITPGTNT	VVITPGTNT	VSVITPGTNT	0.0003	-99.9	17.1875	0.0003	0	17.1875
175	LMDLEGKQGNF	Sequence	LMDLEGKQF	LMDLEGKQGNF	0.0043	-99.9	18.6746	519	APATVCGPK	APATVCGPK	APATVCGPK	0.0003	-99.9	17.1875	0.0002	0	17.1875
805	LPDPSKPSK	Sequence	LPDPSKPSK	LPDPSKPSK	0.0043	-99.9	18.6906	896	PFAMQMAY	#NAME?	PFAMQMAY	0.0003	-99.9	17.2188	0.0033	0	16.2086
1084	GKAHFPREG	Sequence	GKAHFPREG	GKAHFPREG	0.0043	-99.9	18.7209	1214	YIWLGFIAG	YIWLGFIAG	YIWLGFIAG	0.0003	-99.9	17.2188	0.0016	0	17.2188
922	IANQFNSA	Sequence	IAN-QFNSA	IANQFNSA	0.0043	-99.9	18.7352	1049	MSFPQSAPHGV	MSFPAPHGV	MSFPQSAPHGV	0.0003	-99.9	17.2188	0.0003	0	17.2188
998	GRLQSLQTYVT	Sequence	GRLQSLQTY	GRLQSLQTY	0.0042	-99.9	18.7751	269	LQPRTFLL	LQP-RTFLL	LQPRTFLL	0.0003	-99.9	17.25	0.0076	0	11.1784
1153	KYFKNHTSP	Sequence	KYFKNHTSP	KYFKNHTSP	0.0042	-99.9	18.7959	1137	YDPLQPEL	Y-DPLQPEL	YDPLQPEL	0.0003	-99.9	17.25	0.001	0	17.25
943	ALGKLQDVV	Sequence	ALGKLQDVV	ALGKLQDVV	0.0042	-99.9	18.8022	1205	YEQYIKWPW	YEQYIKWPW	YEQYIKWPW	0.0003	-99.9	17.2812	0.031	0	5.3795
601	TNTSNQVAV	Sequence	TNTSNQVAV	TNTSNQVAV	0.0042	-99.9	18.815	37	YPDKVFRSSVL	YPDKVSSVL	YPDKVFRSSVL	0.0003	-99.9	17.2812	0.0013	0	17.2812
146	KNNKSWMESEF	Sequence	KKSWMESEF	KNNKSWMESEF	0.0042	-99.9	18.8262	364	YSVLYNSA	YSV-LYNSA	YSVLYNSA	0.0003	-99.9	17.2812	0.0007	0	17.2812
664	PIGAGICASY	Sequence	PIGAGIASY	PIGAGICASY	0.0042	-99.9	18.8724	184	NFKNLREF	NFKNLR-EF	NFKNLREF	0.0003	-99.9	17.3125	0.004	0	14.8901
237	FQTLLALH	Sequence	FQT-LLALH	FQTLLALH	0.0041	-99.9	18.9187	204	SKHTPINLVR	SHTPINLVR	SKHTPINLVR	0.0003	-99.9	17.3125	0.0015	0	17.3125
121	NATNVVIKV	Sequence	NATNVVIKV	NATNVVIKV	0.0041	-99.9	18.9426	966	SSNFGAISSVL	SSNAISSVL	SSNFGAISSVL	0.0003	-99.9	17.3125	0.0004	0	17.3125
1225	AIVMVTIM	Sequence	AIV-MVTIM	AIVMVTIM	0.0041	-99.9	18.9553	470	EIYQAGSTP	EIYQAGSTP	EIYQAGSTP	0.0003	-99.9	17.3438	0.0007	0	17.3438
993	DRLITGRLQ	Sequence	DRLITGRLQ	DRLITGRLQ	0.0041	-99.9	18.9681	610	LYQDVNCTE	LYQDVNCTE	LYQDVNCTE	0.0003	-99.9	17.3438	0.0006	0	17.3438
464	ERDISTEIYQ	Sequence	ERDISTEIY	ERDISTEIY	0.0041	-99.9	18.9777	809	SKPSKRSFI	SKPSKRSFI	SKPSKRSFI	0.0003	-99.9	17.375	0.0029	0	16.9697
511	VLSFELLHA	Sequence	VLSFELLHA	VLSFELLHA	0.0041	-99.9	18.9856	719	ISVTTEIL	ISV-TTEIL	ISVTTEIL	0.0003	-99.9	17.375	0.001	0	17.375
135	CNDPFLGVYY	Sequence	CNDPFGVYY	CNDPFLGVYY	0.0041	-99.9	18.992	369	NSASFSTFKCY	NSASFSTFY	NSASFSTFKCY	0.0003	-99.9	17.4062	0.0007	0	17.4062
901	MAYRFNGIGV	Sequence	MAYFNGIGV	MAYRFNGIGV	0.0041	-99.9	19.0218	193	FKNIDGYFK	FKNIDGYFK	FKNIDGYFK	0.0003	-99.9	17.4375	0.0021	0	17.4375
514	FELLHAPA	Sequence	FELLHAPA-	FELLHAPA	0.0041	-99.9	19.0258	424	LPDDFTGCVI	LPDDTGCVI	LPDDFTGCVI	0.0003	-99.9	17.4375	0.0004	0	17.4375
895	IPFAMQMAYRF	Sequence	IPFAMQMAF	IPFAMQMAYRF	0.0041	-99.9	19.0337	364	YSVLYNSASFS	YSVYNSASF	YSVLYNSASF	0.0003	-99.9	17.4375	0.0003	0	17.4375
516	LLHAPATV	Sequence	LLH-APATV	LLHAPATV	0.0041	-99.9	19.0417	1222	GLIAIVMVT	GLIAIVMVT	GLIAIVMVT	0.0003	-99.9	17.4688	0.0019	0	17.4688
542	FNGLTGTGVL	Sequence	FNLTGTGVL	FNGLTGTGVL	0.0041	-99.9	19.0794	975	VLNDILSR	VLNDI-LSR	VLNDILSR	0.0003	-99.9	17.5312	0.0005	0	17.5312
95	EKSNIIRGWIF	Sequence	EKSNIIRIF	EKSNIIRGWIF	0.0041	-99.9	19.0893	850	CAQKFNGLTV	CQKFNGLTV	CAQKFNGLTV	0.0003	-99.9	17.5938	0.0098	0	9.8992
334	LCPFGEVF	Sequence	#NAME?	LCPFGEVF	0.004	-99.9	19.0933	475	GSTPCNGVEGF	GSTPGVEGF	GSTPCNGVEGF	0.0003	-99.9	17.5938	0.001	0	17.5938
925	QFNSAIGKI	Sequence	QFNSAIGKI	QFNSAIGKI	0.004	-99.9	19.1012	110	DSKTQSLLI	DSKTQSLLI	DSKTQSLLI	0.0003	-99.9	17.625	0.0008	0	17.625
1178	IQKEIDRLNEV	Sequence	IQIDRLNEV	IQKEIDRLNEV	0.004	-99.9	19.1111	1020	SANLAATKMS	SANLAATKM	SANLAATKM	0.0003	-99.9	17.625	0.0004	0	17.625
729	SMTKTSVDCTM	Sequence	SMTKTSVTM	SMTKTSVDCTM	0.004	-99.9	19.1706	90	YFASTEKSNI	YASTEKSNI	YFASTEKSNI	0.0003	-99.9	17.625	0.0004	0	17.625
997	TGRLQSLQTYV	Sequence	TRLQSLQTY	TGRLQSLQTY	0.004	-99.9	19.1885	636	STGSNVFQT	STGSNVFQT	STGSNVFQT	0.0003	-99.9	17.625	0.0003	0	17.625
763	NRALTGIA	Sequence	NRALTGIA-	NRALTGIA	0.004	-99.9	19.1964	107	TTLDSKTQSLL	TTLDSKTQL	TTLDSKTQSLL	0.0003	-99.9	17.625	0.0002	0	17.625
1006	YVTQQLIRA	Sequence	YVTQQLIRA	YVTQQLIRA	0.004	-99.9	19.2083	697	SLGAENSVA	SLGAENSVA	SLGAENSVA	0.0003	-99.9	17.6562	0.0034	0	15.8398
329	PNITNLCPF	Sequence	PNITNLCPF	PNITNLCPF	0.004	-99.9	19.2381	12	SQCVNLTTR	SQCVNLTTR	SQCVNLTTR	0.0003	-99.9	17.6562	0.0028	0	17.1095
817	IEDLLFNKVTL	Sequence	IELFNKVTL	IEDLLFNKVTL	0.004	-99.9	19.254	633	RVYSTGSN	RVYSTGSN-	RVYSTGSN	0.0003	-99.9	17.6562	0.0014	0	17.6562
193	FKNIDGYFK	Sequence	FKNIDGYFK	FKNIDGYFK	0.004	-99.9	19.2619	305	FTVEKGIYQT	FTVEKGIYT	FTVEKGIYQT	0.0003	-99.9	17.6562	0.0002	0	17.6562
673	YQTQTNSP	Sequence	YQTQTNSP-	YQTQTNSP	0.004	-99.9	19.2659	1013	RAAEIRASAN	RAAEIRAAN	RAAEIRASAN	0.0003	-99.9	17.6875	0.0004	0	17.6875
365	SVLYNSASFS	Sequence	SVLYNSASF	SVLYNSASF	0.004	-99.9	19.2837	459	NLKPFERDI	NLKPFERDI	NLKPFERDI	0.0003	-99.9	17.7188	0.0016	0	17.7188
1221	AGLIAIVM	Sequence	AGL-IAIVM	AGLIAIVM	0.0039	-99.9	19.3056	309	KGIYQTSNFR	KIYQTSNFR	KGIYQTSNFR	0.0003	-99.9	17.7188	0.0008	0	17.7188
200	FKIYSKHT	Sequence	FKIYSKHT-	FKIYSKHT	0.0039	-99.9	19.3373	360	CVADYSVL	CVAD-YSVL	CVADYSVL	0.0003	-99.9	17.7188	0.0006	0	17.7188
1221	AGLIAIVMV	Sequence	AGLIAIVMV	AGLIAIVMV	0.0039	-99.9	19.3889	399	FVIRGDEVRQ	FVIGDEVRQ	FVIRGDEVRQ	0.0003	-99.9	17.7188	0.0003	0	17.7188
504	YQPYRVVVLS	Sequence	YQPYRVVVL	YQPYRVVVL	0.0039	-99.9	19.4246	84	PFNDGVYF	#NAME?	PFNDGVYF	0.0003	-99.9	17.75	0.0049	0	13.6411
247	YLTPGDSSS	Sequence	YLTPGDSSS	YLTPGDSSS	0.0038	-99.9	19.494	67	IHVSGTNGTK	IHVSGTNTK	IHVSGTNGTK	0.0003	-99.9	17.75	0.0017	0	17.75
46	VLHSTQDLFL	Sequence	VLHSTQDLF	VLHSTQDLF	0.0038	-99.9	19.498	122	ATNVVIKV	ATN-VVIKV	ATNVVIKV	0.0003	-99.9	17.75	0.0005	0	17.75
53	LFLPFFSNV	Sequence	LFLPFFSNV	LFLPFFSNV	0.0038	-99.9	19.5	1260	SEPVLKGVKL	SPVLKGVKL	SEPVLKGVKL	0.0003	-99.9	17.7812	0.0136	0	8.4404
603	TSNQVAVL	Sequence	TSN-QVAVL	TSNQVAVL	0.0038	-99.9	19.502	1197	IDLQELGKY	IDLQELGKY	IDLQELGKY	0.0003	-99.9	17.8125	0.0738	0	3.0108
1106	RNFYEPQI	Sequence	RNFYEP-QI	RNFYEPQI	0.0038	-99.9	19.5079	624	HADQLTPTWR	HADQLTPTW	HADQLTPTW	0.0003	-99.9	17.8438	0.0005	0	17.8438
398	SFVIRGDEV	Sequence	SFVIRGDEV	SFVIRGDEV	0.0038	-99.9	19.5139	1190	KNLNESLIDL	KLNESLIDL	KNLNESLIDL	0.0003	-99.9	17.875	0.0015	0	17.875
354	RKRISNCV	Sequence	RKR-ISNCV	RKRISNCV	0.0038	-99.9	19.5238	1098	GTHWFVTQRNF	GTFVTQRNF	GTHWFVTQRNF	0.0003	-99.9	17.875	0.0009	0	17.875
679	SPRRARSVA	Sequence	SPRRARSVA	SPRRARSVA	0.0038	-99.9	19.5437	790	TPPIKDFGGF	TPIKDFGGF	TPPIKDFGGF	0.0003	-99.9	17.9062	0.0028	0	17.1351
118	IVNNATNVVI	Sequence	IVNNATVVI	IVNNATNVVI	0.0038	-99.9	19.5476	959	NTLVKQLSS	NTLVKQLSS	NTLVKQLSS	0.0003	-99.9	17.9062	0.0002	0	17.9062
37	YPDKVFRSS	Sequence	YPDKVFRSS	YPDKVFRSS	0.0038	-99.9	19.5516	845	ARDLICAQKF	ARDLIAQKF	ARDLICAQKF	0.0003	-99.9	18	0.0805	0	2.8216
1168	ISGINASVV	Sequence	ISGINASVV	ISGINASVV	0.0038	-99.9	19.5675	689	QSIIAYTMS	QSIIAYTMS	QSIIAYTMS	0.0003	-99.9	18	0.0002	0	18
491	LQSYGFQP	Sequence	LQSYGFQP-	LQSYGFQP	0.0038	-99.9	19.5794	3	FLVLLPLVS	FLVLLPLVS	FLVLLPLVS	0.0003	-99.9	18.037	0.0011	0	18.037
98	NIIRGWIF	Sequence	NII-RGWIF	NIIRGWIF	0.0038	-99.9	19.5913	975	VLNDILSRLD	VLNDILSRL	VLNDILSRL	0.0003	-99.9	18.037	0.0003	0	18.037
383	PTKLNDLCF	Sequence	PTKLNDLCF	PTKLNDLCF	0.0038	-99.9	19.5933	290	CALDPLSETK	CALDPLSTK	CALDPLSETK	0.0003	-99.9	18.037	0.0002	0	18.037
54	FLPFFSNVTWF	Sequence	FLFSNVTWF	FLPFFSNVTWF	0.0038	-99.9	19.631	239	TLLALHRSYL	TLALHRSYL	TLLALHRSYL	0.0003	-99.9	18.0741	0.0036	0	15.4806
469	TEIYQAGSTP	Sequence	TEYQAGSTP	TEIYQAGSTP	0.0038	-99.9	19.6687	501	GVGYQPYRVV	GVYQPYRVV	GVGYQPYRVV	0.0003	-99.9	18.0741	0.0008	0	18.0741
1019	ASANLAATK	Sequence	ASANLAATK	ASANLAATK	0.0037	-99.9	19.7103	246	SYLTPGDSSS	SYLPGDSSS	SYLTPGDSSS	0.0003	-99.9	18.0741	0.0004	0	18.0741
892	ALQIPFAMQ	Sequence	ALQIPFAMQ	ALQIPFAMQ	0.0037	-99.9	19.7321	1024	AATKMSECVL	AATKMSEVL	AATKMSECVL	0.0003	-99.9	18.1111	0.0005	0	18.1111
1223	LIAIVMVTI	Sequence	LIAIVMVTI	LIAIVMVTI	0.0037	-99.9	19.7401	1087	HFPREGVFV	HFPREGVFV	HFPREGVFV	0.0003	-99.9	18.1111	0.0004	0	18.1111
185	FKNLREFVFK	Sequence	FKNLREFVF	FKNLREFVF	0.0037	-99.9	19.7421	1058	GVVFLHVTYV	GVVFLHVTY	GVVFLHVTY	0.0003	-99.9	18.1481	0.0015	0	18.1481
994	RLITGRLQ	Sequence	RLITGRLQ-	RLITGRLQ	0.0037	-99.9	19.75	695	TMSLGAENSV	TMSLGANSV	TMSLGAENSV	0.0003	-99.9	18.1852	0.001	0	18.1852
971	AISSVLNDI	Sequence	AISSVLNDI	AISSVLNDI	0.0037	-99.9	19.7758	920	KLIANQFNSA	KLIANFNSA	KLIANQFNSA	0.0003	-99.9	18.2222	0.0029	0	16.9827
455	FRKSNLKPFE	Sequence	FRKSNLKPF	FRKSNLKPF	0.0037	-99.9	19.7837	1017	IRASANLAAT	IASANLAAT	IRASANLAAT	0.0003	-99.9	18.2222	0.0015	0	18.2222
1070	QEKNFTTAPA	Sequence	QEKNFTTAA	QEKNFTTAPA	0.0037	-99.9	19.7857	116	LLIVNNATNV	LLINNATNV	LLIVNNATNV	0.0003	-99.9	18.2222	0.0005	0	18.2222
1104	TQRNFYEP	Sequence	TQRNFYEP-	TQRNFYEP	0.0037	-99.9	19.8095	619	VPVAIHADQ	VPVAIHADQ	VPVAIHADQ	0.0003	-99.9	18.2222	0.0003	0	18.2222
1067	VPAQEKNF	Sequence	VPAQEKN-F	VPAQEKNF	0.0037	-99.9	19.8155	109	LDSKTQSLL	LDSKTQSLL	LDSKTQSLL	0.0003	-99.9	18.2593	0.0109	0	9.4328
904	RFNGIGVT	Sequence	RFNGIGVT-	RFNGIGVT	0.0037	-99.9	19.8313	672	SYQTQTNSPR	SYQTQTNSR	SYQTQTNSPR	0.0003	-99.9	18.2963	0.0004	0	18.2963
581	LEILDITP	Sequence	LEILDITP-	LEILDITP	0.0037	-99.9	19.8313	1135	TVYDPLQP	TVYDPLQP-	TVYDPLQP	0.0003	-99.9	18.3333	0.0007	0	18.3333
406	VRQIAPGQT	Sequence	VRQIAPGQT	VRQIAPGQT	0.0037	-99.9	19.8333	1049	MSFPQSAP	MSFPQSAP-	MSFPQSAP	0.0003	-99.9	18.3333	0.0007	0	18.3333
1086	AHFPREGV	Sequence	AHF-PREGV	AHFPREGV	0.0037	-99.9	19.8373	1091	EGVFVSNGTH	EVFVSNGTH	EGVFVSNGTH	0.0003	-99.9	18.3333	0.0003	0	18.3333
401	IRGDEVRQIA	Sequence	IRDEVRQIA	IRGDEVRQIA	0.0037	-99.9	19.8512	1134	NTVYDPLQPEL	NTVPLQPEL	NTVYDPLQPEL	0.0003	-99.9	18.3333	0.0002	0	18.3333
1156	KNHTSPDVDL	Sequence	KNHTSPDVL	KNHTSPDVDL	0.0037	-99.9	19.8591	1255	FDEDDSEPVL	FEDDSEPVL	FDEDDSEPVL	0.0003	-99.9	18.3704	0.0111	0	9.3371
517	LHAPATVCG	Sequence	LHAPATVCG	LHAPATVCG	0.0036	-99.9	19.8909	388	DLCFTNVY	DLC-FTNVY	DLCFTNVY	0.0003	-99.9	18.3704	0.0016	0	18.3704
1013	RAAEIRAS	Sequence	RAAEIRAS-	RAAEIRAS	0.0036	-99.9	19.8948	650	IGAEHVNNS	IGAEHVNNS	IGAEHVNNS	0.0003	-99.9	18.3704	0.0006	0	18.3704
738	TMYICGDST	Sequence	TMYICGDST	TMYICGDST	0.0036	-99.9	19.8988	1187	EVAKNLNES	EVAKNLNES	EVAKNLNES	0.0003	-99.9	18.4074	0.0002	0	18.4074
858	TVLPPLLTDEM	Sequence	TVLPPLLTM	TVLPPLLTDEM	0.0036	-99.9	19.9306	683	ARSVASQSII	ASVASQSII	ARSVASQSII	0.0003	-99.9	18.4444	0.0082	0	10.8122
916	YENQKLIANQ	Sequence	YENQKLIAQ	YENQKLIANQ	0.0036	-99.9	19.9524	190	EFVFKNIDGYF	FVFKNDGYF	FVFKNIDGYF	0.0003	-99.9	18.4444	0.0003	0	18.4444
1018	RASANLAATKM	Sequence	RASAAATKM	RASANLAATKM	0.0036	-99.9	19.9802	544	GLTGTGVL	GLTGTG-VL	GLTGTGVL	0.0003	-99.9	18.4815	0.0012	0	18.4815
535	NKCVNFNF	Sequence	NKC-VNFNF	NKCVNFNF	0.0036	-99.9	19.9921	524	CGPKKSTNL	CGPKKSTNL	CGPKKSTNL	0.0003	-99.9	18.4815	0.0004	0	18.4815
689	QSIIAYTMSL	Sequence	QSIAYTMSL	QSIIAYTMSL	0.0036	-99.9	20	427	DFTGCVIAW	DFTGCVIAW	DFTGCVIAW	0.0003	-99.9	18.5556	0.0018	0	18.5556
305	FTVEKGIYQ	Sequence	FTVEKGIYQ	FTVEKGIYQ	0.0036	-99.9	20.0394	1020	SANLAATK	SAN-LAATK	SANLAATK	0.0003	-99.9	18.5556	0.0004	0	18.5556
336	PFGEVFNATRF	Sequence	GEVFNATRF	GEVFNATRF	0.0036	-99.9	20.0486	1140	LQPELDSFK	LQPELDSFK	LQPELDSFK	0.0003	-99.9	18.5926	0.0011	0	18.5926
974	SVLNDILSR	Sequence	SVLNDILSR	SVLNDILSR	0.0036	-99.9	20.0556	471	IYQAGSTPC	IYQAGSTPC	IYQAGSTPC	0.0003	-99.9	18.5926	0.0005	0	18.5926
1016	EIRASANLAA	Sequence	ERASANLAA	EIRASANLAA	0.0036	-99.9	20.0556	528	KSTNLVKNK	KSTNLVKNK	KSTNLVKNK	0.0003	-99.9	18.5926	0.0004	0	18.5926
75	TKRFDNPVLP	Sequence	TRFDNPVLP	TKRFDNPVLP	0.0035	-99.9	20.1065	794	KDFGGFNF	K-DFGGFNF	KDFGGFNF	0.0003	-99.9	18.6296	0.1102	0	2.1149
43	RSSVLHSTQ	Sequence	RSSVLHSTQ	RSSVLHSTQ	0.0035	-99.9	20.1458	319	VQPTESIVR	VQPTESIVR	VQPTESIVR	0.0003	-99.9	18.6296	0.0101	0	9.7543
1002	SLQTYVTQQ	Sequence	SLQTYVTQQ	SLQTYVTQQ	0.0035	-99.9	20.1551	631	TWRVYSTGSNV	TVYSTGSNV	TWRVYSTGSNV	0.0003	-99.9	18.6296	0.0002	0	18.6296
980	LSRLDKVEA	Sequence	LSRLDKVEA	LSRLDKVEA	0.0035	-99.9	20.162	659	YECDIPIGA	YECDIPIGA	YECDIPIGA	0.0003	-99.9	18.6667	0.0216	0	6.5995
493	SYGFQPTNGV	Sequence	SGFQPTNGV	SYGFQPTNGV	0.0035	-99.9	20.1667	990	VQIDRLITGR	VQIDRLITR	VQIDRLITGR	0.0003	-99.9	18.6667	0.0051	0	13.3959
901	MAYRFNGIG	Sequence	MAYRFNGIG	MAYRFNGIG	0.0035	-99.9	20.1921	114	QSLLIVNNA	QSLLIVNNA	QSLLIVNNA	0.0003	-99.9	18.6667	0.0006	0	18.6667
691	IIAYTMSL	Sequence	IIA-YTMSL	IIAYTMSL	0.0035	-99.9	20.2153	378	CYGVSPTKL	CYGVSPTKL	CYGVSPTKL	0.0003	-99.9	18.6667	0.0006	0	18.6667
1222	GLIAIVMVT	Sequence	GLIAIVMVT	GLIAIVMVT	0.0035	-99.9	20.2176	461	KPFERDISTEI	KPFDISTEI	KPFERDISTEI	0.0003	-99.9	18.7037	0.0078	0	11.0098
450	YLYRLFRKS	Sequence	YLYRLFRKS	YLYRLFRKS	0.0035	-99.9	20.2176	1188	VAKNLNESLI	VAKNNESLI	VAKNLNESLI	0.0003	-99.9	18.7037	0.0009	0	18.7037
1101	WFVTQRNF	Sequence	WFV-TQRNF	WFVTQRNF	0.0035	-99.9	20.2454	1158	HTSPDVDLG	HTSPDVDLG	HTSPDVDLG	0.0003	-99.9	18.7037	0.0003	0	18.7037
260	GAAAYYVGYL	Sequence	GAAAYYVGY	GAAAYYVGY	0.0035	-99.9	20.2616	412	GQTGKIADYNY	GQTGKIANY	GQTGKIADYNY	0.0003	-99.9	18.7407	0.0576	0	3.6138
638	GSNVFQTRA	Sequence	GSNVFQTRA	GSNVFQTRA	0.0035	-99.9	20.2662	946	KLQDVVNQN	KLQDVVNQN	KLQDVVNQN	0.0003	-99.9	18.7407	0.001	0	18.7407
77	RFDNPVLPFN	Sequence	RFDNPVLPF	RFDNPVLPF	0.0035	-99.9	20.3009	712	AIPTNFTI	AI-PTNFTI	AIPTNFTI	0.0003	-99.9	18.7778	0.0012	0	18.7778
232	INITRFQTLL	Sequence	INITRFQTL	INITRFQTLL	0.0035	-99.9	20.3287	1038	RVDFCGKGYH	RVFCGKGYH	RVDFCGKGYH	0.0003	-99.9	18.7778	0.0008	0	18.7778
1127	VVIGIVNNTV	Sequence	VVIGINNTV	VVIGIVNNTV	0.0034	-99.9	20.3403	256	GWTAGAAAYYV	GTAGAAAYY	GWTAGAAAYY	0.0003	-99.9	18.7778	0.0002	0	18.7778
231	GINITRFQTL	Sequence	GNITRFQTL	GINITRFQTL	0.0034	-99.9	20.3565	487	CYFPLQSYGF	CYFPLQSYF	CYFPLQSYGF	0.0003	-99.9	18.8148	0.0027	0	17.323
874	SALLAGTIT	Sequence	SALLAGTIT	SALLAGTIT	0.0034	-99.9	20.3681	754	QYGSFCTQL	QYGSFCTQL	QYGSFCTQL	0.0003	-99.9	18.8148	0.0009	0	18.8148
671	ASYQTQTNS	Sequence	ASYQTQTNS	ASYQTQTNS	0.0034	-99.9	20.3958	1224	IAIVMVTIML	IAIMVTIML	IAIVMVTIML	0.0003	-99.9	18.8148	0.0007	0	18.8148
887	FGAGAALQIPF	Sequence	FGAGAALQF	FGAGAALQIPF	0.0034	-99.9	20.3958	1173	ASVVNIQKE	ASVVNIQKE	ASVVNIQKE	0.0003	-99.9	18.8148	0.0003	0	18.8148
981	SRLDKVEA	Sequence	SRLDKVEA-	SRLDKVEA	0.0034	-99.9	20.4097	1064	VTYVPAQE	VTYVPAQE-	VTYVPAQE	0.0003	-99.9	18.8519	0.0005	0	18.8519
652	AEHVNNSYE	Sequence	AEHVNNSYE	AEHVNNSYE	0.0034	-99.9	20.412	551	LTESNKKF	LT-ESNKKF	LTESNKKF	0.0003	-99.9	18.8889	0.0014	0	18.8889
301	TLKSFTVEK	Sequence	TLKSFTVEK	TLKSFTVEK	0.0034	-99.9	20.4167	913	NVLYENQKLI	NVYENQKLI	NVLYENQKLI	0.0003	-99.9	18.8889	0.0004	0	18.8889
382	SPTKLNDLCF	Sequence	STKLNDLCF	SPTKLNDLCF	0.0034	-99.9	20.4167	878	AGTITSGW	AGT-ITSGW	AGTITSGW	0.0003	-99.9	18.8889	0.0004	0	18.8889
924	NQFNSAIG	Sequence	NQFNSAIG-	NQFNSAIG	0.0034	-99.9	20.4329	1024	AATKMSECV	AATKMSECV	AATKMSECV	0.0003	-99.9	18.8889	0.0004	0	18.8889
603	TSNQVAVLYQ	Sequence	TSNQVAVLY	TSNQVAVLY	0.0034	-99.9	20.4444	613	DVNCTEVPV	DVNCTEVPV	DVNCTEVPV	0.0003	-99.9	18.8889	0.0002	0	18.8889
600	GTNTSNQVA	Sequence	GTNTSNQVA	GTNTSNQVA	0.0034	-99.9	20.4676	635	YSTGSNVFQTR	YSTGSNVTR	YSTGSNVFQTR	0.0003	-99.9	18.8889	0.0001	0	18.8889
427	DFTGCVIAW	Sequence	DFTGCVIAW	DFTGCVIAW	0.0034	-99.9	20.4699	992	IDRLITGRL	IDRLITGRL	IDRLITGRL	0.0003	-99.9	18.9259	0.0207	0	6.7698
472	YQAGSTPCNG	Sequence	YQAGSTPNG	YQAGSTPCNG	0.0034	-99.9	20.5116	258	TAGAAAYYVGY	TAGAAAYYY	TAGAAAYYVGY	0.0003	-99.9	18.9259	0.0016	0	18.9259
202	IYSKHTPINL	Sequence	IYSKHPINL	IYSKHTPINL	0.0034	-99.9	20.5139	445	GGNYNYLYR	GGNYNYLYR	GGNYNYLYR	0.0003	-99.9	18.9259	0.0002	0	18.9259
966	SSNFGAISS	Sequence	SSNFGAISS	SSNFGAISS	0.0034	-99.9	20.5532	442	SKVGGNYNYLY	SKVGGNYLY	SKVGGNYNYLY	0.0003	-99.9	18.963	0.104	0	2.247
780	VFAQVKQIYK	Sequence	VFAQVKQIY	VFAQVKQIY	0.0034	-99.9	20.5556	400	VIRGDEVRQ	VIRGDEVRQ	VIRGDEVRQ	0.0003	-99.9	18.963	0.0005	0	18.963
80	NPVLPFNDGVY	Sequence	NPVLPFNVY	NPVLPFNDGVY	0.0033	-99.9	20.5671	507	YRVVVLSFEL	YVVVLSFEL	YRVVVLSFEL	0.0003	-99.9	19	0.0077	0	11.1014
601	TNTSNQVAVLY	Sequence	TNTSNQVAY	TNTSNQVAVLY	0.0033	-99.9	20.5833	484	GFNCYFPLQSY	GFYFPLQSY	GFNCYFPLQSY	0.0003	-99.9	19	0.0055	0	12.9658
1204	KYEQYIKW	Sequence	K-YEQYIKW	KYEQYIKW	0.0033	-99.9	20.5995	1004	QTYVTQQLIR	QTYVTQQLR	QTYVTQQLIR	0.0003	-99.9	19	0.0002	0	19
564	FGRDIADTT	Sequence	FGRDIADTT	FGRDIADTT	0.0033	-99.9	20.6111	265	YVGYLQPRT	YVGYLQPRT	YVGYLQPRT	0.0003	-99.9	19.0435	0.0002	0	19.0435
115	SLLIVNNAT	Sequence	SLLIVNNAT	SLLIVNNAT	0.0033	-99.9	20.6204	316	NFRVQPTESI	NRVQPTESI	NFRVQPTESI	0.0003	-99.9	19.087	0.0085	0	10.6505
377	KCYGVSPTK	Sequence	KCYGVSPTK	KCYGVSPTK	0.0033	-99.9	20.6343	589	CSFGGVSV	CSF-GGVSV	CSFGGVSV	0.0003	-99.9	19.087	0.0011	0	19.087
675	TQTNSPRRAR	Sequence	TQNSPRRAR	TQTNSPRRAR	0.0033	-99.9	20.6597	529	STNLVKNKC	STNLVKNKC	STNLVKNKC	0.0003	-99.9	19.087	0.0003	0	19.087
64	FHAIHVSGT	Sequence	FHAIHVSGT	FHAIHVSGT	0.0033	-99.9	20.669	50	TQDLFLPF	TQ-DLFLPF	TQDLFLPF	0.0003	-99.9	19.1304	0.0752	0	2.9683
1046	YHLMSFPQS	Sequence	YHLMSFPQS	YHLMSFPQS	0.0033	-99.9	20.6713	47	LHSTQDLFL	LHSTQDLFL	LHSTQDLFL	0.0003	-99.9	19.1304	0.016	0	7.7815
646	AGCLIGAEH	Sequence	AGCLIGAEH	AGCLIGAEH	0.0033	-99.9	20.6991	684	RSVASQSIIA	RVASQSIIA	RSVASQSIIA	0.0003	-99.9	19.1304	0.0007	0	19.1304
150	SWMESEFRV	Sequence	SWMESEFRV	SWMESEFRV	0.0033	-99.9	20.7014	595	SVITPGTN	SVITPGTN-	SVITPGTN	0.0003	-99.9	19.1304	0.0005	0	19.1304
502	VGYQPYRVVV	Sequence	VGYQPRVVV	VGYQPYRVVV	0.0033	-99.9	20.7407	152	MESEFRVY	MESEFR-VY	MESEFRVY	0.0003	-99.9	19.1739	0.2007	1	1.0271
355	KRISNCVA	Sequence	KRIS-NCVA	KRISNCVA	0.0033	-99.9	20.7569	423	KLPDDFTGCVI	KLPDDFTGI	KLPDDFTGCVI	0.0003	-99.9	19.1739	0.0003	0	19.1739
715	TNFTISVTT	Sequence	TNFTISVTT	TNFTISVTT	0.0033	-99.9	20.7662	932	KIQDSLSSTA	KIQDSLSTA	KIQDSLSSTA	0.0003	-99.9	19.2174	0.0064	0	12.0597
1034	GQSKRVDFC	Sequence	GQSKRVDFC	GQSKRVDFC	0.0032	-99.9	20.8194	770	AVEQDKNTQ	AVEQDKNTQ	AVEQDKNTQ	0.0003	-99.9	19.2174	0.0004	0	19.2174
963	KQLSSNFG	Sequence	KQLSSNFG-	KQLSSNFG	0.0032	-99.9	20.8472	290	CALDPLSET	CALDPLSET	CALDPLSET	0.0003	-99.9	19.2609	0.0004	0	19.2609
472	YQAGSTPCNGV	Sequence	YQAGSTNGV	YQAGSTPCNGV	0.0032	-99.9	20.9259	812	SKRSFIEDL	SKRSFIEDL	SKRSFIEDL	0.0002	-99.9	19.3043	0.1081	0	2.1584
9	LVSSQCVNL	Sequence	LVSSQCVNL	LVSSQCVNL	0.0032	-99.9	20.9352	1209	IKWPWYIWL	IKWPWYIWL	IKWPWYIWL	0.0002	-99.9	19.3043	0.0474	0	4.0879
711	IAIPTNFT	Sequence	IAIPTNFT-	IAIPTNFT	0.0032	-99.9	20.9583	265	YVGYLQPRTFL	YVLQPRTFL	YVGYLQPRTFL	0.0002	-99.9	19.3043	0.0005	0	19.3043
1177	NIQKEIDRL	Sequence	NIQKEIDRL	NIQKEIDRL	0.0032	-99.9	20.9745	89	VYFASTEK	VYFAS-TEK	VYFASTEK	0.0002	-99.9	19.3043	0.0005	0	19.3043
983	LDKVEAEVQI	Sequence	LKVEAEVQI	LDKVEAEVQI	0.0031	-99.9	21.0405	675	TQTNSPRRA	TQTNSPRRA	TQTNSPRRA	0.0002	-99.9	19.3478	0.0215	0	6.6184
827	LADAGFIKQ	Sequence	LADAGFIKQ	LADAGFIKQ	0.0031	-99.9	21.073	914	VLYENQKLIA	VLYENKLIA	VLYENQKLIA	0.0002	-99.9	19.3478	0.0016	0	19.3478
748	CSNLLLQY	Sequence	CSNLLL-QY	CSNLLLQY	0.0031	-99.9	21.0811	855	NGLTVLPPL	NGLTVLPPL	NGLTVLPPL	0.0002	-99.9	19.3913	0.0012	0	19.3913
765	ALTGIAVEQ	Sequence	ALTGIAVEQ	ALTGIAVEQ	0.0031	-99.9	21.0919	410	APGQTGKIADY	APTGKIADY	APGQTGKIADY	0.0002	-99.9	19.4348	0.0263	0	5.9039
101	RGWIFGTT	Sequence	RGWIFGTT-	RGWIFGTT	0.0031	-99.9	21.1135	550	VLTESNKKFL	VLTESNKKL	VLTESNKKFL	0.0002	-99.9	19.4348	0.0007	0	19.4348
1198	DLQELGKYEQY	Sequence	DELGKYEQY	DLQELGKYEQY	0.0031	-99.9	21.1216	107	TTLDSKTQS	TTLDSKTQS	TTLDSKTQS	0.0002	-99.9	19.4348	0.0003	0	19.4348
132	FQFCNDPFLG	Sequence	FQFNDPFLG	FQFCNDPFLG	0.0031	-99.9	21.1595	1053	QSAPHGVV	QSA-PHGVV	QSAPHGVV	0.0002	-99.9	19.4783	0.0015	0	19.4783
1127	VVIGIVNNT	Sequence	VVIGIVNNT	VVIGIVNNT	0.0031	-99.9	21.1973	11	SSQCVNLTTR	SSQVNLTTR	SSQCVNLTTR	0.0002	-99.9	19.4783	0.0002	0	19.4783
901	MAYRFNGI	Sequence	MAY-RFNGI	MAYRFNGI	0.0031	-99.9	21.2054	326	VRFPNITNLC	VRFPNITNL	VRFPNITNL	0.0002	-99.9	19.5217	0.0187	0	7.1658
634	VYSTGSNVFQ	Sequence	VYSTGSNVF	VYSTGSNVF	0.0031	-99.9	21.2081	532	LVKNKCVNFNF	LVKNVNFNF	LVKNKCVNFNF	0.0002	-99.9	19.5217	0.0009	0	19.5217
896	PFAMQMAYRF	Sequence	FAMQMAYRF	FAMQMAYRF	0.0031	-99.9	21.2541	104	IFGTTLDSK	IFGTTLDSK	IFGTTLDSK	0.0002	-99.9	19.5217	0.0004	0	19.5217
137	DPFLGVYYH	Sequence	DPFLGVYYH	DPFLGVYYH	0.0031	-99.9	21.2649	942	SALGKLQDVV	SALGKLQVV	SALGKLQDVV	0.0002	-99.9	19.5217	0.0004	0	19.5217
609	VLYQDVNCT	Sequence	VLYQDVNCT	VLYQDVNCT	0.003	-99.9	21.3108	718	TISVTTEI	TIS-VTTEI	TISVTTEI	0.0002	-99.9	19.5217	0.0003	0	19.5217
1081	CHDGKAHF	Sequence	CHD-GKAHF	CHDGKAHF	0.003	-99.9	21.3324	1183	DRLNEVAKNL	RLNEVAKNL	RLNEVAKNL	0.0002	-99.9	19.5652	0.0039	0	14.9829
357	ISNCVADY	Sequence	ISN-CVADY	ISNCVADY	0.003	-99.9	21.3405	402	RGDEVRQIA	RGDEVRQIA	RGDEVRQIA	0.0002	-99.9	19.6087	0.0053	0	13.0915
67	IHVSGTNGTK	Sequence	IHVSGTNTK	IHVSGTNGTK	0.003	-99.9	21.373	892	ALQIPFAMQ	ALQIPFAMQ	ALQIPFAMQ	0.0002	-99.9	19.6087	0.002	0	19.6087
914	VLYENQKLIA	Sequence	VLYENQLIA	VLYENQKLIA	0.003	-99.9	21.3892	609	VLYQDVNCT	VLYQDVNCT	VLYQDVNCT	0.0002	-99.9	19.6087	0.0016	0	19.6087
362	ADYSVLYNSA	Sequence	ADYSVLNSA	ADYSVLYNSA	0.003	-99.9	21.4108	1195	SLIDLQELG	SLIDLQELG	SLIDLQELG	0.0002	-99.9	19.6087	0.0015	0	19.6087
825	VTLADAGFI	Sequence	VTLADAGFI	VTLADAGFI	0.003	-99.9	21.4486	682	RARSVASQ	RARSVASQ-	RARSVASQ	0.0002	-99.9	19.6522	0.0014	0	19.6522
1000	LQSLQTYVTQ	Sequence	LQSQTYVTQ	LQSLQTYVTQ	0.003	-99.9	21.4649	116	LLIVNNATN	LLIVNNATN	LLIVNNATN	0.0002	-99.9	19.6522	0.0006	0	19.6522
590	SFGGVSVI	Sequence	S-FGGVSVI	SFGGVSVI	0.003	-99.9	21.4973	335	CPFGEVFNA	CPFGEVFNA	CPFGEVFNA	0.0002	-99.9	19.6522	0.0005	0	19.6522
505	QPYRVVVL	Sequence	QPY-RVVVL	QPYRVVVL	0.003	-99.9	21.5108	184	NFKNLREFV	NFKNLREFV	NFKNLREFV	0.0002	-99.9	19.6957	0.0003	0	19.6957
868	MIAQYTSALL	Sequence	MIAQYTSAL	MIAQYTSALL	0.003	-99.9	21.5324	690	SIIAYTMSLG	SIIAYTMSL	SIIAYTMSL	0.0002	-99.9	19.6957	0.0003	0	19.6957
459	NLKPFERDI	Sequence	NLKPFERDI	NLKPFERDI	0.003	-99.9	21.5351	58	FSNVTWFHAI	FSNVTFHAI	FSNVTWFHAI	0.0002	-99.9	19.7391	0.0007	0	19.7391
348	SVYAWNRKR	Sequence	SVYAWNRKR	SVYAWNRKR	0.0029	-99.9	21.5703	616	CTEVPVAIH	CTEVPVAIH	CTEVPVAIH	0.0002	-99.9	19.7391	0.0003	0	19.7391
933	IQDSLSSTASA	Sequence	IQLSSTASA	IQDSLSSTASA	0.0029	-99.9	21.6081	77	RFDNPVLPFN	RFDNPVLPF	RFDNPVLPF	0.0002	-99.9	19.7826	0.0019	0	19.7826
845	ARDLICAQK	Sequence	ARDLICAQK	ARDLICAQK	0.0029	-99.9	21.6351	998	GRLQSLQTYV	GRLQSLQTY	GRLQSLQTY	0.0002	-99.9	19.8261	0.039	0	4.6378
376	FKCYGVSPTK	Sequence	FKYGVSPTK	FKCYGVSPTK	0.0029	-99.9	21.6568	53	LFLPFFSNV	LFLPFFSNV	LFLPFFSNV	0.0002	-99.9	19.8261	0.002	0	19.5
392	TNVYADSFVI	Sequence	TVYADSFVI	TNVYADSFVI	0.0029	-99.9	21.6676	949	DVVNQNAQA	DVVNQNAQA	DVVNQNAQA	0.0002	-99.9	19.8261	0.0004	0	19.8261
496	FQPTNGVG	Sequence	FQP-TNGVG	FQPTNGVG	0.0029	-99.9	21.6784	941	ASALGKLQDV	ASALGKLQV	ASALGKLQDV	0.0002	-99.9	19.8261	0.0003	0	19.8261
993	DRLITGRLQSL	Sequence	DRLITGQSL	DRLITGRLQSL	0.0029	-99.9	21.6892	973	SSVLNDILS	SSVLNDILS	SSVLNDILS	0.0002	-99.9	19.8261	0.0002	0	19.8261
1071	EKNFTTAPA	Sequence	EKNFTTAPA	EKNFTTAPA	0.0029	-99.9	21.7054	760	TQLNRALTGI	TQLNRALTI	TQLNRALTGI	0.0002	-99.9	19.8696	0.0143	0	8.2332
371	ASFSTFKCYG	Sequence	ASFSTFKCY	ASFSTFKCY	0.0029	-99.9	21.7865	132	FQFCNDPFLGV	FQFDPFLGV	FQFCNDPFLGV	0.0002	-99.9	19.8696	0.0023	0	18.6427
258	TAGAAAYYVGY	Sequence	TAAAYYVGY	TAGAAAYYVGY	0.0029	-99.9	21.8027	511	VLSFELLHA	VLSFELLHA	VLSFELLHA	0.0002	-99.9	19.8696	0.0022	0	18.9856
833	IKQYGDCL	Sequence	IKQ-YGDCL	IKQYGDCL	0.0029	-99.9	21.8162	729	SMTKTSVDCTM	SMTKTSVTM	SMTKTSVDCTM	0.0002	-99.9	19.8696	0.0021	0	19.1706
951	VNQNAQAL	Sequence	VNQ-NAQAL	VNQNAQAL	0.0029	-99.9	21.8216	634	VYSTGSNVFQ	VYSTGSNVF	VYSTGSNVF	0.0002	-99.9	19.8696	0.0017	0	19.8696
875	ALLAGTIT	Sequence	ALLAGTIT-	ALLAGTIT	0.0029	-99.9	21.8216	82	VLPFNDGVYFA	VLFNDGVYF	VLPFNDGVYF	0.0002	-99.9	19.8696	0.0011	0	19.8696
1148	KEELDKYFK	Sequence	KEELDKYFK	KEELDKYFK	0.0029	-99.9	21.8351	936	SLSSTASALG	SLSSTASAL	SLSSTASAL	0.0002	-99.9	19.913	0.0004	0	19.913
777	TQEVFAQV	Sequence	TQ-EVFAQV	TQEVFAQV	0.0028	-99.9	21.8514	500	NGVGYQPY	NGV-GYQPY	NGVGYQPY	0.0002	-99.9	20	0.0058	0	12.6205
1135	TVYDPLQPE	Sequence	TVYDPLQPE	TVYDPLQPE	0.0028	-99.9	21.8784	940	TASALGKL	TAS-ALGKL	TASALGKL	0.0002	-99.9	20	0.0005	0	20
388	DLCFTNVY	Sequence	DLC-FTNVY	DLCFTNVY	0.0028	-99.9	21.8973	567	DIADTTDAVR	DIADTTAVR	DIADTTDAVR	0.0002	-99.9	20	0.0001	0	20
1039	VDFCGKGYH	Sequence	VDFCGKGYH	VDFCGKGYH	0.0028	-99.9	21.9135	467	ISTEIYQAG	ISTEIYQAG	ISTEIYQAG	0.0002	-99.9	20.05	0.0007	0	20.05
1214	YIWLGFIAG	Sequence	YIWLGFIAG	YIWLGFIAG	0.0028	-99.9	21.9351	858	TVLPPLLT	TVLPPLLT-	TVLPPLLT	0.0002	-99.9	20.05	0.0006	0	20.05
574	AVRDPQTLE	Sequence	AVRDPQTLE	AVRDPQTLE	0.0028	-99.9	21.9514	65	HAIHVSGT	HAIHVSGT-	HAIHVSGT	0.0002	-99.9	20.05	0.0005	0	20.05
1190	KNLNESLIDL	Sequence	KNLNESLIL	KNLNESLIDL	0.0028	-99.9	21.9622	409	IAPGQTGKIA	IAPGTGKIA	IAPGQTGKIA	0.0002	-99.9	20.05	0.0004	0	20.05
1003	LQTYVTQQ	Sequence	LQTYVTQQ-	LQTYVTQQ	0.0028	-99.9	21.9865	739	MYICGDST	MYICGDST-	MYICGDST	0.0002	-99.9	20.05	0.0002	0	20.05
540	FNFNGLTGT	Sequence	FNFNGLTGT	FNFNGLTGT	0.0028	-99.9	21.9892	445	GGNYNYLY	GGNYN-YLY	GGNYNYLY	0.0002	-99.9	20.1	0.0049	0	13.6411
998	GRLQSLQT	Sequence	GRLQSLQT-	GRLQSLQT	0.0028	-99.9	21.9973	502	VGYQPYRVVV	VGYQPRVVV	VGYQPYRVVV	0.0002	-99.9	20.1	0.0018	0	20.1
465	RDISTEIYQ	Sequence	RDISTEIYQ	RDISTEIYQ	0.0028	-99.9	22.0061	691	IIAYTMSLGA	IAYTMSLGA	IIAYTMSLGA	0.0002	-99.9	20.15	0.0003	0	20.15
204	SKHTPINLVR	Sequence	SKHTPILVR	SKHTPINLVR	0.0028	-99.9	22.0336	115	SLLIVNNAT	SLLIVNNAT	SLLIVNNAT	0.0002	-99.9	20.2	0.0018	0	20.2
1195	SLIDLQELG	Sequence	SLIDLQELG	SLIDLQELG	0.0028	-99.9	22.0398	1055	APHGVVFL	APHG-VVFL	APHGVVFL	0.0002	-99.9	20.2	0.0014	0	20.2
863	LLTDEMIAQ	Sequence	LLTDEMIAQ	LLTDEMIAQ	0.0028	-99.9	22.0765	940	TASALGKLQ	TASALGKLQ	TASALGKLQ	0.0002	-99.9	20.2	0.0006	0	20.2
1053	QSAPHGVV	Sequence	QSAPHGVV-	QSAPHGVV	0.0028	-99.9	22.0917	996	ITGRLQSL	IT-GRLQSL	ITGRLQSL	0.0002	-99.9	20.2	0.0004	0	20.2
782	AQVKQIYKTP	Sequence	AQVKQIKTP	AQVKQIYKTP	0.0028	-99.9	22.1009	571	TTDAVRDPQ	TTDAVRDPQ	TTDAVRDPQ	0.0002	-99.9	20.2	0.0002	0	20.2
419	DYNYKLPDDF	Sequence	YNYKLPDDF	YNYKLPDDF	0.0028	-99.9	22.1162	184	NFKNLREFVF	NFKNLREVF	NFKNLREFVF	0.0002	-99.9	20.25	0.0072	0	11.4767
51	QDLFLPFF	Sequence	QDL-FLPFF	QDLFLPFF	0.0027	-99.9	22.1468	357	ISNCVADYS	ISNCVADYS	ISNCVADYS	0.0002	-99.9	20.25	0.0001	0	20.25
982	RLDKVEAEVQI	Sequence	RKVEAEVQI	RLDKVEAEVQI	0.0027	-99.9	22.159	862	PLLTDEMIAQY	PLDEMIAQY	PLLTDEMIAQY	0.0002	-99.9	20.3	0.0008	0	20.3
794	KDFGGFNFSQ	Sequence	KDFGGFNSQ	KDFGGFNFSQ	0.0027	-99.9	22.1682	594	VSVITPGTN	VSVITPGTN	VSVITPGTN	0.0002	-99.9	20.3	0.0003	0	20.3
237	FQTLLALHR	Sequence	FQTLLALHR	FQTLLALHR	0.0027	-99.9	22.1713	548	TGVLTESNK	TGVLTESNK	TGVLTESNK	0.0002	-99.9	20.3	0.0002	0	20.3
1058	GVVFLHVTYV	Sequence	GVVFLHVTY	GVVFLHVTY	0.0027	-99.9	22.1865	1171	INASVVNIQK	IASVVNIQK	INASVVNIQK	0.0002	-99.9	20.3	0.0002	0	20.3
1084	GKAHFPREGV	Sequence	GKAHFPREV	GKAHFPREGV	0.0027	-99.9	22.2141	465	RDISTEIY	R-DISTEIY	RDISTEIY	0.0002	-99.9	20.35	0.0524	0	3.8437
933	IQDSLSSTAS	Sequence	IQSLSSTAS	IQDSLSSTAS	0.0027	-99.9	22.2324	815	SFIEDLLFNK	SFIEDLLNK	SFIEDLLFNK	0.0002	-99.9	20.35	0.0002	0	20.35
849	ICAQKFNGL	Sequence	ICAQKFNGL	ICAQKFNGL	0.0027	-99.9	22.2813	36	YYPDKVFR	Y-YPDKVFR	YYPDKVFR	0.0002	-99.9	20.4	0.0002	0	20.4
645	RAGCLIGAEH	Sequence	RAGLIGAEH	RAGCLIGAEH	0.0027	-99.9	22.2905	681	RRARSVASQ	RRARSVASQ	RRARSVASQ	0.0002	-99.9	20.45	0.0176	0	7.3935
134	FCNDPFLGV	Sequence	FCNDPFLGV	FCNDPFLGV	0.0027	-99.9	22.3303	876	LLAGTITS	LLAGTITS-	LLAGTITS	0.0002	-99.9	20.45	0.0007	0	20.45
758	FCTQLNRAL	Sequence	FCTQLNRAL	FCTQLNRAL	0.0027	-99.9	22.3303	245	RSYLTPGDSS	RSYTPGDSS	RSYLTPGDSS	0.0002	-99.9	20.45	0.0007	0	20.45
1017	IRASANLAAT	Sequence	IRASANLAT	IRASANLAAT	0.0027	-99.9	22.3425	809	SKPSKRSF	#NAME?	SKPSKRSF	0.0002	-99.9	20.5	0.0214	0	6.6378
88	GVYFASTEK	Sequence	GVYFASTEK	GVYFASTEK	0.0027	-99.9	22.3547	504	YQPYRVVV	YQ-PYRVVV	YQPYRVVV	0.0002	-99.9	20.5	0.0134	0	8.4809
312	YQTSNFRVQP	Sequence	YQSNFRVQP	YQTSNFRVQP	0.0027	-99.9	22.3914	874	SALLAGTI	SAL-LAGTI	SALLAGTI	0.0002	-99.9	20.5	0.0014	0	20.5
1048	LMSFPQSAP	Sequence	LMSFPQSAP	LMSFPQSAP	0.0027	-99.9	22.4159	342	NATRFASVYAW	NRFASVYAW	NATRFASVYAW	0.0002	-99.9	20.55	0.0057	0	12.733
362	ADYSVLYNS	Sequence	ADYSVLYNS	ADYSVLYNS	0.0027	-99.9	22.4251	504	YQPYRVVVLS	YQPYRVVVL	YQPYRVVVL	0.0002	-99.9	20.55	0.0021	0	19.4246
267	GYLQPRTFLL	Sequence	GYLQPRTLL	GYLQPRTFLL	0.0026	-99.9	22.4587	973	SSVLNDIL	SSVLNDI-L	SSVLNDIL	0.0002	-99.9	20.55	0.0005	0	20.55
1110	EPQIITTDNTF	Sequence	EIITTDNTF	EPQIITTDNTF	0.0026	-99.9	22.4771	434	AWNSNNLDSK	AWNSNNLSK	AWNSNNLDSK	0.0002	-99.9	20.6	0.0002	0	20.6
874	SALLAGTI	Sequence	SALLAG-TI	SALLAGTI	0.0026	-99.9	22.4801	829	DAGFIKQY	DA-GFIKQY	DAGFIKQY	0.0002	-99.9	20.65	0.0028	0	17.2162
1214	YIWLGFIAGL	Sequence	YIWLGFIAL	YIWLGFIAGL	0.0026	-99.9	22.5229	606	QVAVLYQDV	QVAVLYQDV	QVAVLYQDV	0.0002	-99.9	20.65	0.0003	0	20.65
274	FLLKYNENGTI	Sequence	FKYNENGTI	FLLKYNENGTI	0.0026	-99.9	22.5321	777	TQEVFAQVK	TQEVFAQVK	TQEVFAQVK	0.0002	-99.9	20.75	0.0052	0	13.2584
970	GAISSVLNDI	Sequence	GAISSVLNI	GAISSVLNDI	0.0026	-99.9	22.5627	896	PFAMQMAYRF	FAMQMAYRF	FAMQMAYRF	0.0002	-99.9	20.75	0.0016	0	20.75
131	EFQFCNDPFL	Sequence	FQFCNDPFL	FQFCNDPFL	0.0026	-99.9	22.581	245	RSYLTPGDS	RSYLTPGDS	RSYLTPGDS	0.0002	-99.9	20.75	0.0007	0	20.75
1224	IAIVMVTI	Sequence	IAIV-MVTI	IAIVMVTI	0.0026	-99.9	22.63	623	IHADQLTPT	IHADQLTPT	IHADQLTPT	0.0002	-99.9	20.8	0.0039	0	15.009
1152	DKYFKNHTS	Sequence	DKYFKNHTS	DKYFKNHTS	0.0026	-99.9	22.682	1010	QLIRAAEIR	QLIRAAEIR	QLIRAAEIR	0.0002	-99.9	20.85	0.0002	0	20.85
989	EVQIDRLITG	Sequence	VQIDRLITG	VQIDRLITG	0.0026	-99.9	22.6942	692	IAYTMSLGAE	IAYTMSGAE	IAYTMSLGAE	0.0002	-99.9	20.85	0.0002	0	20.85
937	LSSTASAL	Sequence	LSS-TASAL	LSSTASAL	0.0026	-99.9	22.737	1166	GDISGINASV	GISGINASV	GDISGINASV	0.0002	-99.9	20.9	0.0035	0	15.7219
96	KSNIIRGW	Sequence	KSN-IIRGW	KSNIIRGW	0.0025	-99.9	22.7554	340	VFNATRFAS	VFNATRFAS	VFNATRFAS	0.0002	-99.9	20.9	0.0006	0	20.9
216	PQGFSALEPL	Sequence	PQFSALEPL	PQGFSALEPL	0.0025	-99.9	22.7584	1226	IVMVTIMLC	IVMVTIMLC	IVMVTIMLC	0.0002	-99.9	20.9	0.0005	0	20.9
46	VLHSTQDL	Sequence	VLH-STQDL	VLHSTQDL	0.0025	-99.9	22.7829	1119	TFVSGNCDV	TFVSGNCDV	TFVSGNCDV	0.0002	-99.9	20.9	0.0004	0	20.9
988	AEVQIDRLITG	Sequence	AQIDRLITG	AEVQIDRLITG	0.0025	-99.9	22.8165	26	AYTNSFTRGV	ATNSFTRGV	AYTNSFTRGV	0.0002	-99.9	20.9	0.0003	0	20.9
89	VYFASTEKS	Sequence	VYFASTEKS	VYFASTEKS	0.0025	-99.9	22.8196	75	TKRFDNPVLPF	KRFDNPVLF	KRFDNPVLPF	0.0002	-99.9	20.95	0.0507	0	3.9162
988	AEVQIDRLIT	Sequence	AEVQDRLIT	AEVQIDRLIT	0.0025	-99.9	22.8349	62	TWFHAIHVS	TWFHAIHVS	TWFHAIHVS	0.0002	-99.9	21	0.0025	0	18.0128
730	MTKTSVDCTMY	Sequence	MTKTSVTMY	MTKTSVDCTMY	0.0025	-99.9	22.8563	590	SFGGVSVI	S-FGGVSVI	SFGGVSVI	0.0002	-99.9	21	0.0016	0	21
1055	APHGVVFL	Sequence	APH-GVVFL	APHGVVFL	0.0025	-99.9	22.8563	610	LYQDVNCTEV	LYQDVNTEV	LYQDVNCTEV	0.0002	-99.9	21	0.0004	0	21
1207	QYIKWPWYI	Sequence	QYIKWPWYI	QYIKWPWYI	0.0025	-99.9	22.8685	450	YLYRLFRKS	YLYRLFRKS	YLYRLFRKS	0.0002	-99.9	21.0556	0.0019	0	20.2176
542	FNGLTGTGV	Sequence	FNGLTGTGV	FNGLTGTGV	0.0025	-99.9	22.8716	191	FVFKNIDG	FVFKNIDG-	FVFKNIDG	0.0002	-99.9	21.0556	0.0002	0	21.0556
242	ALHRSYLTP	Sequence	ALHRSYLTP	ALHRSYLTP	0.0025	-99.9	22.8838	160	SSANNCTFEYV	SSANNTFEY	SSANNCTFEY	0.0002	-99.9	21.0556	0.0002	0	21.0556
641	VFQTRAGCLI	Sequence	VQTRAGCLI	VFQTRAGCLI	0.0025	-99.9	22.896	909	GVTQNVLYE	GVTQNVLYE	GVTQNVLYE	0.0002	-99.9	21.0556	0.0002	0	21.0556
551	LTESNKKF	Sequence	LTE-SNKKF	LTESNKKF	0.0025	-99.9	22.9113	87	DGVYFASTEK	DVYFASTEK	DGVYFASTEK	0.0002	-99.9	21.0556	0.0001	0	21.0556
633	RVYSTGSN	Sequence	RVYSTGSN-	RVYSTGSN	0.0025	-99.9	22.9266	904	RFNGIGVT	RFNGIGVT-	RFNGIGVT	0.0002	-99.9	21.1111	0.0019	0	19.8313
682	RARSVASQ	Sequence	RARSVASQ-	RARSVASQ	0.0025	-99.9	22.9541	990	VQIDRLIT	VQIDRLIT-	VQIDRLIT	0.0002	-99.9	21.1667	0.0517	0	3.8747
364	YSVLYNSAS	Sequence	YSVLYNSAS	YSVLYNSAS	0.0025	-99.9	22.9725	472	YQAGSTPCNGV	YQAGSTNGV	YQAGSTPCNGV	0.0002	-99.9	21.1667	0.0017	0	20.9259
946	KLQDVVNQNA	Sequence	KQDVVNQNA	KLQDVVNQNA	0.0025	-99.9	22.9817	1255	FDEDDSEPV	FDEDDSEPV	FDEDDSEPV	0.0002	-99.9	21.1667	0.0006	0	21.1667
169	YVSQPFLMDL	Sequence	YVSQPFLML	YVSQPFLMDL	0.0025	-99.9	22.9939	597	ITPGTNTSN	ITPGTNTSN	ITPGTNTSN	0.0002	-99.9	21.1667	0.0003	0	21.1667
776	NTQEVFAQV	Sequence	NTQEVFAQV	NTQEVFAQV	0.0025	-99.9	23.0138	545	LTGTGVLTE	LTGTGVLTE	LTGTGVLTE	0.0002	-99.9	21.1667	0.0003	0	21.1667
492	QSYGFQPTN	Sequence	QSYGFQPTN	QSYGFQPTN	0.0025	-99.9	23.0138	646	AGCLIGAEH	AGCLIGAEH	AGCLIGAEH	0.0002	-99.9	21.2222	0.0018	0	20.6991
1203	GKYEQYIK	Sequence	GKYEQYIK-	GKYEQYIK	0.0025	-99.9	23.0311	46	VLHSTQDL	VLH-STQDL	VLHSTQDL	0.0002	-99.9	21.2222	0.0014	0	21.2222
325	IVRFPNITN	Sequence	IVRFPNITN	IVRFPNITN	0.0024	-99.9	23.0484	939	STASALGKLQ	STASALGKL	STASALGKL	0.0002	-99.9	21.2222	0.0002	0	21.2222
395	YADSFVIRG	Sequence	YADSFVIRG	YADSFVIRG	0.0024	-99.9	23.0519	48	HSTQDLFLPFF	HSTQDLFLF	HSTQDLFLPFF	0.0002	-99.9	21.2778	0.0025	0	17.9959
1261	EPVLKGVKLHY	Sequence	ELKGVKLHY	EPVLKGVKLHY	0.0024	-99.9	23.0692	221	ALEPLVDL	AL-EPLVDL	ALEPLVDL	0.0002	-99.9	21.2778	0.0006	0	21.2778
20	RTQLPPAYT	Sequence	RTQLPPAYT	RTQLPPAYT	0.0024	-99.9	23.1246	744	DSTECSNLL	DSTECSNLL	DSTECSNLL	0.0002	-99.9	21.2778	0.0003	0	21.2778
1201	ELGKYEQYIKW	Sequence	EKYEQYIKW	ELGKYEQYIKW	0.0024	-99.9	23.1384	219	FSALEPLVD	FSALEPLVD	FSALEPLVD	0.0002	-99.9	21.2778	0.0002	0	21.2778
574	AVRDPQTLEIL	Sequence	AVRDPQTIL	AVRDPQTLEIL	0.0024	-99.9	23.1488	688	SQSIIAYTMSL	SQIAYTMSL	SQSIIAYTMSL	0.0002	-99.9	21.3889	0.0275	0	5.7649
1068	PAQEKNFTTA	Sequence	AQEKNFTTA	AQEKNFTTA	0.0024	-99.9	23.1869	976	LNDILSRL	#NAME?	LNDILSRL	0.0002	-99.9	21.3889	0.0003	0	21.3889
258	TAGAAAYYV	Sequence	TAGAAAYYV	TAGAAAYYV	0.0024	-99.9	23.2318	782	AQVKQIYKT	AQVKQIYKT	AQVKQIYKT	0.0002	-99.9	21.4444	0.0481	0	4.0456
502	VGYQPYRVVVL	Sequence	VQPYRVVVL	VGYQPYRVVVL	0.0024	-99.9	23.2734	1003	LQTYVTQQLI	LQYVTQQLI	LQTYVTQQLI	0.0002	-99.9	21.4444	0.0051	0	13.3678
525	GPKKSTNLV	Sequence	GPKKSTNLV	GPKKSTNLV	0.0024	-99.9	23.2907	236	RFQTLLALH	RFQTLLALH	RFQTLLALH	0.0002	-99.9	21.4444	0.0034	0	15.8344
74	GTKRFDNPV	Sequence	GTKRFDNPV	GTKRFDNPV	0.0024	-99.9	23.301	1121	VSGNCDVVI	VSGNCDVVI	VSGNCDVVI	0.0002	-99.9	21.4444	0.0006	0	21.4444
537	CVNFNFNGL	Sequence	CVNFNFNGL	CVNFNFNGL	0.0024	-99.9	23.3356	247	YLTPGDSS	YLTPGDSS-	YLTPGDSS	0.0002	-99.9	21.4444	0.0004	0	21.4444
658	SYECDIPIGA	Sequence	SECDIPIGA	SYECDIPIGA	0.0024	-99.9	23.3391	29	NSFTRGVYYPD	NSFTRGVYY	NSFTRGVYY	0.0002	-99.9	21.4444	0.0004	0	21.4444
627	QLTPTWRVYS	Sequence	QLTPTWRVY	QLTPTWRVY	0.0024	-99.9	23.3668	227	DLPIGINITR	DLIGINITR	DLPIGINITR	0.0002	-99.9	21.4444	0.0003	0	21.4444
746	TECSNLLLQ	Sequence	TECSNLLLQ	TECSNLLLQ	0.0024	-99.9	23.3772	814	RSFIEDLLFN	RSFIEDLLF	RSFIEDLLF	0.0002	-99.9	21.5	0.0048	0	13.7004
24	PPAYTNSF	Sequence	#NAME?	PPAYTNSF	0.0024	-99.9	23.3806	915	LYENQKLIA	LYENQKLIA	LYENQKLIA	0.0002	-99.9	21.5	0.0011	0	21.5
243	LHRSYLTPG	Sequence	LHRSYLTPG	LHRSYLTPG	0.0023	-99.9	23.4221	1145	DSFKEELDKYF	DSFELDKYF	DSFKEELDKYF	0.0002	-99.9	21.5	0.0004	0	21.5
113	TQSLLIVNNA	Sequence	TQLLIVNNA	TQSLLIVNNA	0.0023	-99.9	23.436	112	KTQSLLIVN	KTQSLLIVN	KTQSLLIVN	0.0002	-99.9	21.5	0.0003	0	21.5
254	SSGWTAGAAA	Sequence	SSWTAGAAA	SSGWTAGAAA	0.0023	-99.9	23.4602	407	RQIAPGQT	RQIAPGQT-	RQIAPGQT	0.0002	-99.9	21.5556	0.176	1	1.2019
1106	RNFYEPQIIT	Sequence	RFYEPQIIT	RNFYEPQIIT	0.0023	-99.9	23.5017	215	LPQGFSAL	LPQ-GFSAL	LPQGFSAL	0.0002	-99.9	21.5556	0.0009	0	21.5556
1226	IVMVTIML	Sequence	IVM-VTIML	IVMVTIML	0.0023	-99.9	23.5156	746	TECSNLLLQY	TECSNLLLY	TECSNLLLQY	0.0002	-99.9	21.6111	0.0494	0	3.9747
111	SKTQSLLI	Sequence	SKT-QSLLI	SKTQSLLI	0.0023	-99.9	23.5294	327	RFPNITNLC	RFPNITNLC	RFPNITNLC	0.0002	-99.9	21.6111	0.0006	0	21.6111
1048	LMSFPQSA	Sequence	LMS-FPQSA	LMSFPQSA	0.0023	-99.9	23.5329	103	WIFGTTLDS	WIFGTTLDS	WIFGTTLDS	0.0002	-99.9	21.6111	0.0003	0	21.6111
868	MIAQYTSALLA	Sequence	MQYTSALLA	MIAQYTSALLA	0.0023	-99.9	23.5606	508	RVVVLSFELL	RVVVSFELL	RVVVLSFELL	0.0002	-99.9	21.6667	0.0008	0	21.6667
908	IGVTQNVLYE	Sequence	IGVTQNVLY	IGVTQNVLY	0.0023	-99.9	23.5848	414	TGKIADYNYK	TGIADYNYK	TGKIADYNYK	0.0002	-99.9	21.6667	0.0004	0	21.6667
657	NSYECDIPI	Sequence	NSYECDIPI	NSYECDIPI	0.0023	-99.9	23.5952	149	KSWMESEFR	KSWMESEFR	KSWMESEFR	0.0002	-99.9	21.6667	0.0002	0	21.6667
1223	LIAIVMVTIM	Sequence	LAIVMVTIM	LIAIVMVTIM	0.0023	-99.9	23.6159	694	YTMSLGAENS	YTMSLGAES	YTMSLGAENS	0.0002	-99.9	21.7222	0.0002	0	21.7222
248	LTPGDSSSGW	Sequence	LTPGDSSSW	LTPGDSSSGW	0.0023	-99.9	23.6263	1123	GNCDVVIGI	GNCDVVIGI	GNCDVVIGI	0.0002	-99.9	21.7778	0.0024	0	18.3525
141	GVYYHKNNKSW	Sequence	GVYKNNKSW	GVYYHKNNKSW	0.0023	-99.9	23.6332	1153	KYFKNHTSP	KYFKNHTSP	KYFKNHTSP	0.0002	-99.9	21.7778	0.0022	0	18.7959
366	VLYNSASFS	Sequence	VLYNSASFS	VLYNSASFS	0.0023	-99.9	23.699	66	AIHVSGTNG	AIHVSGTNG	AIHVSGTNG	0.0002	-99.9	21.7778	0.0006	0	21.7778
1165	LGDISGINA	Sequence	LGDISGINA	LGDISGINA	0.0023	-99.9	23.7024	978	DILSRLDKV	DILSRLDKV	DILSRLDKV	0.0002	-99.9	21.7778	0.0002	0	21.7778
796	FGGFNFSQIL	Sequence	FGFNFSQIL	FGGFNFSQIL	0.0023	-99.9	23.7232	398	SFVIRGDEVR	SVIRGDEVR	SFVIRGDEVR	0.0002	-99.9	21.7778	0.0002	0	21.7778
37	YPDKVFRSSVL	Sequence	YKVFRSSVL	YPDKVFRSSVL	0.0023	-99.9	23.7266	609	VLYQDVNCTEV	VLYQDVTEV	VLYQDVNCTEV	0.0002	-99.9	21.8333	0.0004	0	21.8333
596	VITPGTNTS	Sequence	VITPGTNTS	VITPGTNTS	0.0023	-99.9	23.737	512	LSFELLHAP	LSFELLHAP	LSFELLHAP	0.0002	-99.9	21.8889	0.0007	0	21.8889
703	SVAYSNNSIA	Sequence	SAYSNNSIA	SVAYSNNSIA	0.0022	-99.9	23.7682	1208	YIKWPWYIWL	YIWPWYIWL	YIKWPWYIWL	0.0002	-99.9	21.9444	0.0033	0	15.9748
50	TQDLFLPFFS	Sequence	TQDLFLPFF	TQDLFLPFF	0.0022	-99.9	23.7716	645	RAGCLIGAEH	RAGLIGAEH	RAGCLIGAEH	0.0002	-99.9	21.9444	0.0014	0	21.9444
42	FRSSVLHSTQ	Sequence	FRSSVHSTQ	FRSSVLHSTQ	0.0022	-99.9	23.8028	634	VYSTGSNV	#NAME?	VYSTGSNV	0.0002	-99.9	21.9444	0.0005	0	21.9444
225	LVDLPIGINI	Sequence	LDLPIGINI	LVDLPIGINI	0.0022	-99.9	23.8201	162	ANNCTFEY	#NAME?	ANNCTFEY	0.0002	-99.9	22	0.0039	0	14.9714
752	LLQYGSFCTQL	Sequence	LQYGSFTQL	LQYGSFCTQL	0.0022	-99.9	23.8304	590	SFGGVSVIT	SFGGVSVIT	SFGGVSVIT	0.0002	-99.9	22	0.0006	0	22
567	DIADTTDAV	Sequence	DIADTTDAV	DIADTTDAV	0.0022	-99.9	23.8685	696	MSLGAENSVA	MSLGANSVA	MSLGAENSVA	0.0002	-99.9	22	0.0005	0	22
1050	SFPQSAPHGVV	Sequence	SQSAPHGVV	SFPQSAPHGVV	0.0022	-99.9	23.8685	1031	CVLGQSKRV	CVLGQSKRV	CVLGQSKRV	0.0002	-99.9	22.0625	0.0003	0	22.0625
1217	LGFIAGLIAI	Sequence	LGFIAGLAI	LGFIAGLIAI	0.0022	-99.9	23.8754	600	GTNTSNQVAVL	GTNTSNAVL	GTNTSNQVAVL	0.0002	-99.9	22.0625	0.0002	0	22.0625
683	ARSVASQS	Sequence	ARSVASQS-	ARSVASQS	0.0022	-99.9	23.8754	1178	IQKEIDRLNEV	IQIDRLNEV	IQKEIDRLNEV	0.0002	-99.9	22.125	0.0021	0	19.1111
1206	EQYIKWPWYI	Sequence	EQYKWPWYI	EQYIKWPWYI	0.0022	-99.9	23.9377	540	FNFNGLTGT	FNFNGLTGT	FNFNGLTGT	0.0002	-99.9	22.125	0.0015	0	21.9892
969	FGAISSVL	Sequence	FGA-ISSVL	FGAISSVL	0.0022	-99.9	23.955	394	VYADSFVI	VYADS-FVI	VYADSFVI	0.0002	-99.9	22.125	0.0007	0	22.125
212	VRDLPQGFS	Sequence	VRDLPQGFS	VRDLPQGFS	0.0022	-99.9	23.9862	247	YLTPGDSSSG	YLTPGSSSG	YLTPGDSSSG	0.0002	-99.9	22.125	0.0003	0	22.125
326	VRFPNITNLCP	Sequence	VRFPNITNL	VRFPNITNL	0.0022	-99.9	23.9896	393	NVYADSFV	NVYAD-SFV	NVYADSFV	0.0002	-99.9	22.125	0.0003	0	22.125
786	QIYKTPPIK	Sequence	QIYKTPPIK	QIYKTPPIK	0.0022	-99.9	23.9965	596	VITPGTNT	VITPGTNT-	VITPGTNT	0.0002	-99.9	22.125	0.0003	0	22.125
1011	LIRAAEIRA	Sequence	LIRAAEIRA	LIRAAEIRA	0.0022	-99.9	24.0042	899	MQMAYRFNGI	MQMAYRNGI	MQMAYRFNGI	0.0002	-99.9	22.1875	0.0127	0	8.7433
152	MESEFRVYSS	Sequence	MESEFRVSS	MESEFRVYSS	0.0022	-99.9	24.05	785	KQIYKTPPIK	KIYKTPPIK	KQIYKTPPIK	0.0002	-99.9	22.1875	0.0067	0	11.805
1015	AEIRASAN	Sequence	AEIRASAN-	AEIRASAN	0.0022	-99.9	24.0625	1218	GFIAGLIAIV	GFIAGLIAV	GFIAGLIAIV	0.0002	-99.9	22.1875	0.0004	0	22.1875
339	EVFNATRFA	Sequence	EVFNATRFA	EVFNATRFA	0.0022	-99.9	24.0667	1050	SFPQSAPHGV	SFQSAPHGV	SFPQSAPHGV	0.0002	-99.9	22.1875	0.0002	0	22.1875
234	ITRFQTLLA	Sequence	ITRFQTLLA	ITRFQTLLA	0.0022	-99.9	24.0917	593	GVSVITPGT	GVSVITPGT	GVSVITPGT	0.0002	-99.9	22.1875	0.0002	0	22.1875
954	NAQALNTL	Sequence	NAQ-ALNTL	NAQALNTL	0.0021	-99.9	24.1125	1130	GIVNNTVYD	GIVNNTVYD	GIVNNTVYD	0.0002	-99.9	22.1875	0.0001	0	22.1875
1053	QSAPHGVVFLH	Sequence	QSAPHGVVF	QSAPHGVVF	0.0021	-99.9	24.1542	269	LQPRTFLLK	LQPRTFLLK	LQPRTFLLK	0.0002	-99.9	22.25	0.0032	0	16.1016
1219	FIAGLIAI	Sequence	FIA-GLIAI	FIAGLIAI	0.0021	-99.9	24.1625	963	KQLSSNFGA	KQLSSNFGA	KQLSSNFGA	0.0002	-99.9	22.3125	0.0443	0	4.2769
931	GKIQDSLS	Sequence	GKIQDSLS-	GKIQDSLS	0.0021	-99.9	24.1625	923	ANQFNSAIGK	AQFNSAIGK	ANQFNSAIGK	0.0002	-99.9	22.3125	0.0024	0	18.244
583	ILDITPCSFG	Sequence	ILDITPCSF	ILDITPCSF	0.0021	-99.9	24.1667	4	LVLLPLVSS	LVLLPLVSS	LVLLPLVSS	0.0002	-99.9	22.3125	0.0004	0	22.3125
568	IADTTDAVR	Sequence	IADTTDAVR	IADTTDAVR	0.0021	-99.9	24.2	84	PFNDGVYFA	PFNDGVYFA	PFNDGVYFA	0.0002	-99.9	22.3125	0.0003	0	22.3125
855	NGLTVLPPL	Sequence	NGLTVLPPL	NGLTVLPPL	0.0021	-99.9	24.2042	858	TVLPPLLTD	TVLPPLLTD	TVLPPLLTD	0.0002	-99.9	22.3125	0.0003	0	22.3125
1069	AQEKNFTTAPA	Sequence	AQEKNFTTA	AQEKNFTTAPA	0.0021	-99.9	24.225	784	VKQIYKTPPI	VQIYKTPPI	VKQIYKTPPI	0.0002	-99.9	22.375	0.007	0	11.6172
311	IYQTSNFRV	Sequence	IYQTSNFRV	IYQTSNFRV	0.0021	-99.9	24.2375	665	IGAGICASYQ	IGAGICASY	IGAGICASY	0.0002	-99.9	22.375	0.0007	0	22.375
712	AIPTNFTI	Sequence	A-IPTNFTI	AIPTNFTI	0.0021	-99.9	24.2375	33	RGVYYPDKVFR	RYYPDKVFR	RGVYYPDKVFR	0.0002	-99.9	22.375	0.0006	0	22.375
436	NSNNLDSKV	Sequence	NSNNLDSKV	NSNNLDSKV	0.0021	-99.9	24.3042	448	YNYLYRLFR	YNYLYRLFR	YNYLYRLFR	0.0002	-99.9	22.375	0.0006	0	22.375
142	VYYHKNNKS	Sequence	VYYHKNNKS	VYYHKNNKS	0.0021	-99.9	24.3625	1005	TYVTQQLIR	TYVTQQLIR	TYVTQQLIR	0.0002	-99.9	22.375	0.0005	0	22.375
257	WTAGAAAYYV	Sequence	WTAGAAAYY	WTAGAAAYY	0.0021	-99.9	24.3958	726	LPVSMTKTS	LPVSMTKTS	LPVSMTKTS	0.0002	-99.9	22.375	0.0003	0	22.375
745	STECSNLLL	Sequence	STECSNLLL	STECSNLLL	0.0021	-99.9	24.4625	805	LPDPSKPSKR	LPDPSPSKR	LPDPSKPSKR	0.0002	-99.9	22.375	0.0002	0	22.375
25	PAYTNSFTR	Sequence	PAYTNSFTR	PAYTNSFTR	0.0021	-99.9	24.4792	1055	APHGVVFLHV	APHGVVLHV	APHGVVFLHV	0.0002	-99.9	22.4375	0.0004	0	22.4375
544	GLTGTGVL	Sequence	GLT-GTGVL	GLTGTGVL	0.0021	-99.9	24.4833	937	LSSTASALG	LSSTASALG	LSSTASALG	0.0002	-99.9	22.4375	0.0002	0	22.4375
697	SLGAENSVAYS	Sequence	SLAENSVAY	SLGAENSVAY	0.0021	-99.9	24.4958	314	TSNFRVQPT	TSNFRVQPT	TSNFRVQPT	0.0002	-99.9	22.4375	0.0002	0	22.4375
263	AYYVGYLQP	Sequence	AYYVGYLQP	AYYVGYLQP	0.0021	-99.9	24.4958	1178	IQKEIDRL	IQKEID-RL	IQKEIDRL	0.0002	-99.9	22.5	0.0434	0	4.3294
915	LYENQKLIA	Sequence	LYENQKLIA	LYENQKLIA	0.002	-99.9	24.5417	1053	QSAPHGVVFLH	QSAPHGVVH	QSAPHGVVFLH	0.0002	-99.9	22.5	0.0012	0	22.5
319	VQPTESIVRFP	Sequence	VQTESIVRF	VQPTESIVRF	0.002	-99.9	24.5417	544	GLTGTGVLT	GLTGTGVLT	GLTGTGVLT	0.0002	-99.9	22.5	0.0004	0	22.5
133	QFCNDPFLGVY	Sequence	QFDPFLGVY	QFCNDPFLGVY	0.002	-99.9	24.5625	895	IPFAMQMAYRF	IPFAMQMAF	IPFAMQMAYRF	0.0002	-99.9	22.5625	0.0021	0	19.0337
82	VLPFNDGVYFA	Sequence	VLFNDGVYF	VLPFNDGVYF	0.002	-99.9	24.5708	723	TEILPVSM	TEI-LPVSM	TEILPVSM	0.0002	-99.9	22.625	0.0816	0	2.7907
12	SQCVNLTT	Sequence	SQCVNLTT-	SQCVNLTT	0.002	-99.9	24.5917	991	QIDRLITGRL	QIDRITGRL	QIDRLITGRL	0.0002	-99.9	22.625	0.0003	0	22.625
1070	QEKNFTTAPAI	Sequence	QEFTTAPAI	QEKNFTTAPAI	0.002	-99.9	24.5958	709	NSIAIPTNFTI	NSIAIPTTI	NSIAIPTNFTI	0.0002	-99.9	22.625	0.0002	0	22.625
18	TTRTQLPPA	Sequence	TTRTQLPPA	TTRTQLPPA	0.002	-99.9	24.7	1259	DSEPVLKGV	DSEPVLKGV	DSEPVLKGV	0.0002	-99.9	22.625	0.0002	0	22.625
732	KTSVDCTM	Sequence	KTS-VDCTM	KTSVDCTM	0.002	-99.9	24.7458	21	TQLPPAYTN	TQLPPAYTN	TQLPPAYTN	0.0002	-99.9	22.6875	0.0245	0	6.1439
890	GAALQIPFA	Sequence	GAALQIPFA	GAALQIPFA	0.002	-99.9	24.7792	212	VRDLPQGFSAL	VLPQGFSAL	VRDLPQGFSAL	0.0002	-99.9	22.6875	0.0057	0	12.7216
122	ATNVVIKVC	Sequence	ATNVVIKVC	ATNVVIKVC	0.002	-99.9	24.7958	719	ISVTTEILPV	ISVTTILPV	ISVTTEILPV	0.0002	-99.9	22.6875	0.0003	0	22.6875
743	GDSTECSNL	Sequence	GDSTECSNL	GDSTECSNL	0.002	-99.9	24.8042	834	KQYGDCLGDI	KQYGDLGDI	KQYGDCLGDI	0.0002	-99.9	22.75	0.0131	0	8.606
889	AGAALQIPFAM	Sequence	AALQIPFAM	AGAALQIPFAM	0.002	-99.9	24.8125	826	TLADAGFIKQ	TLADAGIKQ	TLADAGFIKQ	0.0002	-99.9	22.75	0.0004	0	22.75
350	YAWNRKRI	Sequence	YAWNR-KRI	YAWNRKRI	0.002	-99.9	24.8292	306	TVEKGIYQT	TVEKGIYQT	TVEKGIYQT	0.0002	-99.9	22.75	0.0003	0	22.75
745	STECSNLLLQY	Sequence	STSNLLLQY	STECSNLLLQY	0.002	-99.9	24.8333	722	TTEILPVSMTK	TTLPVSMTK	TTEILPVSMTK	0.0002	-99.9	22.75	0.0002	0	22.75
141	GVYYHKNNK	Sequence	GVYYHKNNK	GVYYHKNNK	0.002	-99.9	24.8375	154	SEFRVYSSA	SEFRVYSSA	SEFRVYSSA	0.0002	-99.9	22.8125	0.0591	0	3.5452
551	LTESNKKFLPF	Sequence	LSNKKFLPF	LTESNKKFLPF	0.002	-99.9	24.8417	452	YRLFRKSNLK	YLFRKSNLK	YRLFRKSNLK	0.0002	-99.9	22.8125	0.0007	0	22.8125
57	FFSNVTWFH	Sequence	FFSNVTWFH	FFSNVTWFH	0.002	-99.9	24.8542	283	TITDAVDCA	TITDAVDCA	TITDAVDCA	0.0002	-99.9	22.8125	0.0002	0	22.8125
174	FLMDLEGKQ	Sequence	FLMDLEGKQ	FLMDLEGKQ	0.002	-99.9	24.9042	387	NDLCFTNVY	NDLCFTNVY	NDLCFTNVY	0.0002	-99.9	22.875	0.0305	0	5.4221
122	ATNVVIKVCEF	Sequence	ATNVVIKVF	ATNVVIKVCEF	0.002	-99.9	24.925	617	TEVPVAIHA	TEVPVAIHA	TEVPVAIHA	0.0002	-99.9	22.9375	0.0433	0	4.3354
426	DDFTGCVIA	Sequence	DDFTGCVIA	DDFTGCVIA	0.0019	-99.9	24.95	760	TQLNRALTG	TQLNRALTG	TQLNRALTG	0.0002	-99.9	22.9375	0.042	0	4.4128
333	NLCPFGEVFN	Sequence	NLCPFGEVF	NLCPFGEVF	0.0019	-99.9	24.9667	509	VVVLSFEL	VVV-LSFEL	VVVLSFEL	0.0002	-99.9	22.9375	0.0005	0	22.9375
113	TQSLLIVNN	Sequence	TQSLLIVNN	TQSLLIVNN	0.0019	-99.9	24.9792	776	NTQEVFAQVK	NTQEVFAVK	NTQEVFAQVK	0.0002	-99.9	22.9375	0.0002	0	22.9375
253	SSSGWTAGA	Sequence	SSSGWTAGA	SSSGWTAGA	0.0019	-99.9	24.9958	824	KVTLADAGFI	KTLADAGFI	KVTLADAGFI	0.0002	-99.9	23	0.0004	0	23
644	TRAGCLIGAEH	Sequence	TRAGIGAEH	TRAGCLIGAEH	0.0019	-99.9	24.9958	253	SSSGWTAGAA	SSSGWTAAA	SSSGWTAGAA	0.0002	-99.9	23	0.0002	0	23
1169	SGINASVVNI	Sequence	SGINASVVI	SGINASVVNI	0.0019	-99.9	25	90	YFASTEKSN	YFASTEKSN	YFASTEKSN	0.0002	-99.9	23	0.0002	0	23
178	LEGKQGNFK	Sequence	LEGKQGNFK	LEGKQGNFK	0.0019	-99.9	25.0048	1155	FKNHTSPDV	FKNHTSPDV	FKNHTSPDV	0.0002	-99.9	23.0667	0.0153	0	7.9559
390	CFTNVYADSF	Sequence	CFTNVYASF	CFTNVYADSF	0.0019	-99.9	25.0143	674	QTQTNSPRR	QTQTNSPRR	QTQTNSPRR	0.0002	-99.9	23.0667	0.0002	0	23.0667
268	YLQPRTFLLK	Sequence	YLQPRFLLK	YLQPRTFLLK	0.0019	-99.9	25.0429	1221	AGLIAIVMV	AGLIAIVMV	AGLIAIVMV	0.0002	-99.9	23.2	0.002	0	19.3889
724	EILPVSMTK	Sequence	EILPVSMTK	EILPVSMTK	0.0019	-99.9	25.0524	738	TMYICGDST	TMYICGDST	TMYICGDST	0.0002	-99.9	23.2	0.0019	0	19.8988
502	VGYQPYRV	Sequence	VGYQPYRV-	VGYQPYRV	0.0019	-99.9	25.0571	871	QYTSALLAG	QYTSALLAG	QYTSALLAG	0.0002	-99.9	23.2667	0.0004	0	23.2667
935	DSLSSTASA	Sequence	DSLSSTASA	DSLSSTASA	0.0019	-99.9	25.0667	1014	AAEIRASA	AA-EIRASA	AAEIRASA	0.0002	-99.9	23.2667	0.0004	0	23.2667
492	QSYGFQPT	Sequence	QSYGFQPT-	QSYGFQPT	0.0019	-99.9	25.0667	789	KTPPIKDFG	KTPPIKDFG	KTPPIKDFG	0.0002	-99.9	23.3333	0.0002	0	23.3333
1167	DISGINASV	Sequence	DISGINASV	DISGINASV	0.0019	-99.9	25.0714	56	PFFSNVTW	#NAME?	PFFSNVTW	0.0002	-99.9	23.4	0.0009	0	23.4
728	VSMTKTSV	Sequence	VSMTK-TSV	VSMTKTSV	0.0019	-99.9	25.081	192	VFKNIDGYFK	VFKNIDGYF	VFKNIDGYF	0.0002	-99.9	23.4	0.0006	0	23.4
322	TESIVRFPNI	Sequence	TESIVFPNI	TESIVRFPNI	0.0019	-99.9	25.0952	965	LSSNFGAI	LSS-NFGAI	LSSNFGAI	0.0002	-99.9	23.4	0.0004	0	23.4
777	TQEVFAQVKQI	Sequence	TQFAQVKQI	TQEVFAQVKQI	0.0019	-99.9	25.1	6	LLPLVSSQC	LLPLVSSQC	LLPLVSSQC	0.0002	-99.9	23.4	0.0003	0	23.4
1178	IQKEIDRLNE	Sequence	IQKEDRLNE	IQKEIDRLNE	0.0019	-99.9	25.1	94	TEKSNIIRGW	TEKSNIIRW	TEKSNIIRGW	0.0002	-99.9	23.4667	0.024	0	6.227
885	WTFGAGAALQ	Sequence	WTFGAGAAL	WTFGAGAAL	0.0019	-99.9	25.1048	1147	FKEELDKY	F-KEELDKY	FKEELDKY	0.0002	-99.9	23.4667	0.0114	0	9.2208
75	TKRFDNPV	Sequence	TKR-FDNPV	TKRFDNPV	0.0019	-99.9	25.119	796	FGGFNFSQIL	FGFNFSQIL	FGGFNFSQIL	0.0002	-99.9	23.4667	0.0012	0	23.4667
406	VRQIAPGQTGK	Sequence	RQIAPGQTK	RQIAPGQTGK	0.0019	-99.9	25.1476	583	ILDITPCSFG	ILDITPCSF	ILDITPCSF	0.0002	-99.9	23.4667	0.0012	0	23.4667
338	GEVFNATR	Sequence	GEV-FNATR	GEVFNATR	0.0019	-99.9	25.1571	889	AGAALQIPFAM	AALQIPFAM	AGAALQIPFAM	0.0002	-99.9	23.4667	0.0011	0	23.4667
962	VKQLSSNFGA	Sequence	VQLSSNFGA	VKQLSSNFGA	0.0019	-99.9	25.1571	93	STEKSNIIRGW	STSNIIRGW	STEKSNIIRGW	0.0002	-99.9	23.4667	0.0009	0	23.4667
891	AALQIPFAMQ	Sequence	AALQIPFAM	AALQIPFAM	0.0019	-99.9	25.181	991	QIDRLITGR	QIDRLITGR	QIDRLITGR	0.0002	-99.9	23.4667	0.0001	0	23.4667
626	DQLTPTWRVYS	Sequence	DQLTPTRVY	DQLTPTWRVY	0.0019	-99.9	25.1857	1016	EIRASANLAA	EIRSANLAA	EIRASANLAA	0.0002	-99.9	23.5333	0.0019	0	20.0556
1113	IITTDNTFV	Sequence	IITTDNTFV	IITTDNTFV	0.0019	-99.9	25.1905	227	DLPIGINITRF	LPIGNITRF	LPIGINITRF	0.0002	-99.9	23.5333	0.0004	0	23.5333
565	GRDIADTTDA	Sequence	GRDIADTTA	GRDIADTTDA	0.0019	-99.9	25.2095	699	GAENSVAYS	GAENSVAYS	GAENSVAYS	0.0002	-99.9	23.5333	0.0002	0	23.5333
576	RDPQTLEI	Sequence	#NAME?	RDPQTLEI	0.0019	-99.9	25.2524	169	YVSQPFLMD	YVSQPFLMD	YVSQPFLMD	0.0002	-99.9	23.5333	0.0002	0	23.5333
796	FGGFNFSQI	Sequence	FGGFNFSQI	FGGFNFSQI	0.0019	-99.9	25.2762	428	FTGCVIAW	FT-GCVIAW	FTGCVIAW	0.0002	-99.9	23.5333	0.0002	0	23.5333
318	RVQPTESIVR	Sequence	RQPTESIVR	RVQPTESIVR	0.0019	-99.9	25.2952	893	LQIPFAMQMA	LQIPFAMQM	LQIPFAMQM	0.0002	-99.9	23.6	0.0371	0	4.8007
156	FRVYSSANNC	Sequence	FRYSSANNC	FRVYSSANNC	0.0019	-99.9	25.3	1210	KWPWYIWLGF	KPWYIWLGF	KWPWYIWLGF	0.0002	-99.9	23.6	0.0024	0	18.2153
552	TESNKKFL	Sequence	TES-NKKFL	TESNKKFL	0.0019	-99.9	25.3	41	VFRSSVLHS	VFRSSVLHS	VFRSSVLHS	0.0002	-99.9	23.6667	0.001	0	23.6667
1207	QYIKWPWYIW	Sequence	QYIKPWYIW	QYIKWPWYIW	0.0019	-99.9	25.319	886	TFGAGAALQI	TFAGAALQI	TFGAGAALQI	0.0002	-99.9	23.6667	0.0005	0	23.6667
1140	LQPELDSFK	Sequence	LQPELDSFK	LQPELDSFK	0.0019	-99.9	25.3286	600	GTNTSNQV	GTN-TSNQV	GTNTSNQV	0.0002	-99.9	23.6667	0.0002	0	23.6667
219	FSALEPLVDL	Sequence	FSALEPLVL	FSALEPLVDL	0.0019	-99.9	25.3381	726	LPVSMTKTSV	LPVSTKTSV	LPVSMTKTSV	0.0002	-99.9	23.6667	0.0002	0	23.6667
3	FLVLLPLVS	Sequence	FLVLLPLVS	FLVLLPLVS	0.0019	-99.9	25.3524	970	GAISSVLND	GAISSVLND	GAISSVLND	0.0002	-99.9	23.6667	0.0001	0	23.6667
999	RLQSLQTYVT	Sequence	RQSLQTYVT	RLQSLQTYVT	0.0019	-99.9	25.3571	1196	LIDLQELGK	LIDLQELGK	LIDLQELGK	0.0002	-99.9	23.6667	0.0001	0	23.6667
152	MESEFRVYSSA	Sequence	MESEFRVSA	MESEFRVYSSA	0.0019	-99.9	25.381	951	VNQNAQAL	#NAME?	VNQNAQAL	0.0002	-99.9	23.7333	0.0015	0	21.8216
589	CSFGGVSV	Sequence	CSF-GGVSV	CSFGGVSV	0.0018	-99.9	25.4143	502	VGYQPYRV	VGY-QPYRV	VGYQPYRV	0.0002	-99.9	23.7333	0.001	0	23.7333
0	MFVFLVLLPL	Sequence	MVFLVLLPL	MFVFLVLLPL	0.0018	-99.9	25.4381	587	TPCSFGGVSVI	TSFGGVSVI	TPCSFGGVSVI	0.0002	-99.9	23.7333	0.0004	0	23.7333
405	EVRQIAPGQTG	Sequence	RQIAPGQTG	RQIAPGQTG	0.0018	-99.9	25.4762	345	RFASVYAWNR	RFASVYANR	RFASVYAWNR	0.0002	-99.9	23.7333	0.0001	0	23.7333
159	YSSANNCTFE	Sequence	YSSANNCTF	YSSANNCTF	0.0018	-99.9	25.4905	626	DQLTPTWRV	DQLTPTWRV	DQLTPTWRV	0.0002	-99.9	23.8	0.0113	0	9.2613
41	VFRSSVLHS	Sequence	VFRSSVLHS	VFRSSVLHS	0.0018	-99.9	25.5619	749	SNLLLQYGSF	SLLLQYGSF	SNLLLQYGSF	0.0002	-99.9	23.8667	0.0094	0	10.102
840	LGDIAARDL	Sequence	LGDIAARDL	LGDIAARDL	0.0018	-99.9	25.5762	372	SFSTFKCY	#NAME?	SFSTFKCY	0.0002	-99.9	23.8667	0.0029	0	16.7654
1090	REGVFVSN	Sequence	REGVFVSN-	REGVFVSN	0.0018	-99.9	25.6333	1221	AGLIAIVM	AGL-IAIVM	AGLIAIVM	0.0002	-99.9	23.8667	0.0021	0	19.3056
947	LQDVVNQNAQ	Sequence	LQDVVNNAQ	LQDVVNQNAQ	0.0018	-99.9	25.6429	1038	RVDFCGKGYHL	RVDGKGYHL	RVDFCGKGYHL	0.0002	-99.9	23.8667	0.0004	0	23.8667
781	FAQVKQIYK	Sequence	FAQVKQIYK	FAQVKQIYK	0.0018	-99.9	25.6524	843	IAARDLICAQ	IAADLICAQ	IAARDLICAQ	0.0002	-99.9	23.8667	0.0002	0	23.8667
763	NRALTGIAVE	Sequence	NRALTGIAV	NRALTGIAV	0.0018	-99.9	25.6714	361	VADYSVLYN	VADYSVLYN	VADYSVLYN	0.0002	-99.9	23.8667	0.0002	0	23.8667
23	LPPAYTNSFT	Sequence	LPPAYTNSF	LPPAYTNSF	0.0018	-99.9	25.6762	778	QEVFAQVKQIY	EVFQVKQIY	EVFAQVKQIY	0.0002	-99.9	23.9333	0.0217	0	6.5713
156	FRVYSSANN	Sequence	FRVYSSANN	FRVYSSANN	0.0018	-99.9	25.681	230	IGINITRFQ	IGINITRFQ	IGINITRFQ	0.0002	-99.9	23.9333	0.0005	0	23.9333
475	GSTPCNGVEGF	Sequence	GSTPGVEGF	GSTPCNGVEGF	0.0018	-99.9	25.7048	969	FGAISSVLN	FGAISSVLN	FGAISSVLN	0.0002	-99.9	23.9333	0.0002	0	23.9333
311	IYQTSNFRVQ	Sequence	IQTSNFRVQ	IYQTSNFRVQ	0.0018	-99.9	25.7238	462	PFERDISTEIY	FRDISTEIY	FERDISTEIY	0.0002	-99.9	24	0.0219	0	6.5414
1186	NEVAKNLNE	Sequence	NEVAKNLNE	NEVAKNLNE	0.0018	-99.9	25.7905	1132	VNNTVYDPL	VNNTVYDPL	VNNTVYDPL	0.0002	-99.9	24	0.0062	0	12.226
1260	SEPVLKGV	Sequence	SE-PVLKGV	SEPVLKGV	0.0018	-99.9	25.7952	20	RTQLPPAYTN	RTLPPAYTN	RTQLPPAYTN	0.0002	-99.9	24	0.0062	0	12.2569
296	SETKCTLKS	Sequence	SETKCTLKS	SETKCTLKS	0.0018	-99.9	25.819	1222	GLIAIVMVTI	GLIAIVVTI	GLIAIVMVTI	0.0002	-99.9	24	0.0007	0	24
324	SIVRFPNIT	Sequence	SIVRFPNIT	SIVRFPNIT	0.0018	-99.9	25.8381	461	KPFERDISTE	KPFERISTE	KPFERDISTE	0.0002	-99.9	24	0.0004	0	24
358	SNCVADYSV	Sequence	SNCVADYSV	SNCVADYSV	0.0018	-99.9	25.8381	644	TRAGCLIGA	TRAGCLIGA	TRAGCLIGA	0.0002	-99.9	24.0833	0.0025	0	17.9068
719	ISVTTEIL	Sequence	ISV-TTEIL	ISVTTEIL	0.0018	-99.9	25.8619	334	LCPFGEVF	LCPFG-EVF	LCPFGEVF	0.0002	-99.9	24.0833	0.0021	0	19.0933
918	NQKLIANQ	Sequence	NQKLIANQ-	NQKLIANQ	0.0017	-99.9	25.9	979	ILSRLDKVEA	ISRLDKVEA	ILSRLDKVEA	0.0002	-99.9	24.0833	0.0003	0	24.0833
906	NGIGVTQNVL	Sequence	NGIGVTNVL	NGIGVTQNVL	0.0017	-99.9	25.9048	859	VLPPLLTDE	VLPPLLTDE	VLPPLLTDE	0.0002	-99.9	24.0833	0.0002	0	24.0833
367	LYNSASFST	Sequence	LYNSASFST	LYNSASFST	0.0017	-99.9	25.9143	1008	TQQLIRAAE	TQQLIRAAE	TQQLIRAAE	0.0002	-99.9	24.1667	0.0064	0	12.0305
1129	IGIVNNTV	Sequence	IGI-VNNTV	IGIVNNTV	0.0017	-99.9	25.919	661	CDIPIGAGI	CDIPIGAGI	CDIPIGAGI	0.0002	-99.9	24.1667	0.0045	0	14.0778
946	KLQDVVNQN	Sequence	KLQDVVNQN	KLQDVVNQN	0.0017	-99.9	25.9381	1048	LMSFPQSA	LMSFPQSA-	LMSFPQSA	0.0002	-99.9	24.1667	0.0012	0	23.5329
1079	AICHDGKAH	Sequence	AICHDGKAH	AICHDGKAH	0.0017	-99.9	25.9952	920	KLIANQFNS	KLIANQFNS	KLIANQFNS	0.0002	-99.9	24.1667	0.0006	0	24.1667
847	DLICAQKF	Sequence	DLICA-QKF	DLICAQKF	0.0017	-99.9	26.0169	950	VVNQNAQA	VVNQN-AQA	VVNQNAQA	0.0002	-99.9	24.1667	0.0003	0	24.1667
56	PFFSNVTW	Sequence	PFF-SNVTW	PFFSNVTW	0.0017	-99.9	26.0282	643	QTRAGCLIGA	QTRAGLIGA	QTRAGCLIGA	0.0002	-99.9	24.1667	0.0002	0	24.1667
1120	FVSGNCDVV	Sequence	FVSGNCDVV	FVSGNCDVV	0.0017	-99.9	26.0395	92	ASTEKSNIIR	ASTESNIIR	ASTEKSNIIR	0.0002	-99.9	24.1667	0.0001	0	24.1667
1137	YDPLQPEL	Sequence	YD-PLQPEL	YDPLQPEL	0.0017	-99.9	26.0847	411	PGQTGKIADY	GQTGKIADY	GQTGKIADY	0.0002	-99.9	24.25	0.0184	0	7.2229
706	YSNNSIAIP	Sequence	YSNNSIAIP	YSNNSIAIP	0.0017	-99.9	26.1017	840	LGDIAARDL	LGDIAARDL	LGDIAARDL	0.0002	-99.9	24.25	0.001	0	24.25
897	FAMQMAYRFN	Sequence	FAMQMAYRF	FAMQMAYRF	0.0017	-99.9	26.113	157	RVYSSANN	RVYSSANN-	RVYSSANN	0.0002	-99.9	24.25	0.0007	0	24.25
355	KRISNCVADYS	Sequence	KRISNCVAY	KRISNCVADY	0.0017	-99.9	26.113	510	VVLSFELL	VVL-SFELL	VVLSFELL	0.0002	-99.9	24.25	0.0007	0	24.25
695	TMSLGAENSV	Sequence	TMLGAENSV	TMSLGAENSV	0.0017	-99.9	26.1299	1144	LDSFKEELDKY	DSFEELDKY	DSFKEELDKY	0.0002	-99.9	24.25	0.0004	0	24.25
866	DEMIAQYTS	Sequence	DEMIAQYTS	DEMIAQYTS	0.0017	-99.9	26.1808	874	SALLAGTITS	SALAGTITS	SALLAGTITS	0.0002	-99.9	24.25	0.0004	0	24.25
99	IIRGWIFGTTL	Sequence	IIRGFGTTL	IIRGWIFGTTL	0.0017	-99.9	26.1864	492	QSYGFQPTNGV	QSYGPTNGV	QSYGFQPTNGV	0.0002	-99.9	24.25	0.0002	0	24.25
1260	SEPVLKGVKLH	Sequence	SELKGVKLH	SEPVLKGVKLH	0.0017	-99.9	26.2486	416	KIADYNYKLP	KIADYNYKL	KIADYNYKL	0.0002	-99.9	24.25	0.0002	0	24.25
659	YECDIPIG	Sequence	YECDIPIG-	YECDIPIG	0.0017	-99.9	26.2486	1189	AKNLNESLI	AKNLNESLI	AKNLNESLI	0.0002	-99.9	24.3333	0.0347	0	5.0035
685	SVASQSIIAYT	Sequence	SVAQSIIAY	SVASQSIIAY	0.0017	-99.9	26.2542	542	FNGLTGTGVL	FGLTGTGVL	FNGLTGTGVL	0.0002	-99.9	24.3333	0.0021	0	19.0794
93	STEKSNIIRGW	Sequence	SKSNIIRGW	STEKSNIIRGW	0.0017	-99.9	26.3051	274	FLLKYNENGTI	FLYNENGTI	FLLKYNENGTI	0.0002	-99.9	24.3333	0.0014	0	22.5321
555	NKKFLPFQQ	Sequence	NKKFLPFQQ	NKKFLPFQQ	0.0017	-99.9	26.3107	1165	LGDISGINA	LGDISGINA	LGDISGINA	0.0002	-99.9	24.3333	0.0012	0	23.7024
277	KYNENGTI	Sequence	KYNENG-TI	KYNENGTI	0.0017	-99.9	26.3446	1154	YFKNHTSPDV	YFKNHTSPV	YFKNHTSPDV	0.0002	-99.9	24.3333	0.0005	0	24.3333
410	APGQTGKIA	Sequence	APGQTGKIA	APGQTGKIA	0.0017	-99.9	26.3955	338	GEVFNATRFA	GVFNATRFA	GEVFNATRFA	0.0002	-99.9	24.4167	0.017	0	7.5016
224	PLVDLPIGI	Sequence	PLVDLPIGI	PLVDLPIGI	0.0017	-99.9	26.4181	946	KLQDVVNQNA	KLQDVVNQA	KLQDVVNQNA	0.0002	-99.9	24.4167	0.0013	0	22.9817
109	LDSKTQSL	Sequence	LDSK-TQSL	LDSKTQSL	0.0017	-99.9	26.4181	738	TMYICGDSTE	TYICGDSTE	TMYICGDSTE	0.0002	-99.9	24.4167	0.0004	0	24.4167
108	TLDSKTQSLL	Sequence	TLDSKTQSL	TLDSKTQSLL	0.0016	-99.9	26.452	705	AYSNNSIA	#NAME?	AYSNNSIA	0.0002	-99.9	24.4167	0.0003	0	24.4167
532	LVKNKCVNFNF	Sequence	LVKNVNFNF	LVKNKCVNFNF	0.0016	-99.9	26.4802	14	CVNLTTRTQL	CVNTTRTQL	CVNLTTRTQL	0.0002	-99.9	24.4167	0.0002	0	24.4167
794	KDFGGFNFSQI	Sequence	KDFGGFNQI	KDFGGFNFSQI	0.0016	-99.9	26.5028	728	VSMTKTSVD	VSMTKTSVD	VSMTKTSVD	0.0002	-99.9	24.4167	0.0002	0	24.4167
474	AGSTPCNGV	Sequence	AGSTPCNGV	AGSTPCNGV	0.0016	-99.9	26.5198	1019	ASANLAAT	ASANLAAT-	ASANLAAT	0.0002	-99.9	24.5	0.0004	0	24.5
642	FQTRAGCLIG	Sequence	FQRAGCLIG	FQTRAGCLIG	0.0016	-99.9	26.5254	432	VIAWNSNNLD	VIAWNSNNL	VIAWNSNNL	0.0002	-99.9	24.5	0.0001	0	24.5
551	LTESNKKFL	Sequence	LTESNKKFL	LTESNKKFL	0.0016	-99.9	26.5367	181	KQGNFKNLR	KQGNFKNLR	KQGNFKNLR	0.0002	-99.9	24.5833	0.003	0	16.5535
1001	QSLQTYVTQQL	Sequence	QQTYVTQQL	QSLQTYVTQQL	0.0016	-99.9	26.5367	1204	KYEQYIKW	KY-EQYIKW	KYEQYIKW	0.0002	-99.9	24.5833	0.0017	0	20.5995
131	EFQFCNDPF	Sequence	EFQFCNDPF	EFQFCNDPF	0.0016	-99.9	26.565	223	EPLVDLPIGI	ELVDLPIGI	EPLVDLPIGI	0.0002	-99.9	24.5833	0.0002	0	24.5833
465	RDISTEIYQA	Sequence	RDISTIYQA	RDISTEIYQA	0.0016	-99.9	26.5876	312	YQTSNFRV	YQTSNFRV-	YQTSNFRV	0.0002	-99.9	24.6667	0.011	0	9.3758
652	AEHVNNSYEC	Sequence	AEVNNSYEC	AEHVNNSYEC	0.0016	-99.9	26.5876	551	LTESNKKFLPF	LTESNFLPF	LTESNKKFLPF	0.0002	-99.9	24.6667	0.0011	0	24.6667
1039	VDFCGKGYHLM	Sequence	VDFKGYHLM	VDFCGKGYHLM	0.0016	-99.9	26.5932	673	YQTQTNSPRR	YTQTNSPRR	YQTQTNSPRR	0.0002	-99.9	24.6667	0.0008	0	24.6667
1205	YEQYIKWPWYI	Sequence	YEIKWPWYI	YEQYIKWPWYI	0.0016	-99.9	26.6215	257	WTAGAAAYYVG	WTAGAAAYY	WTAGAAAYY	0.0002	-99.9	24.6667	0.0001	0	24.6667
100	IRGWIFGTT	Sequence	IRGWIFGTT	IRGWIFGTT	0.0016	-99.9	26.6328	902	AYRFNGIGVT	AYFNGIGVT	AYRFNGIGVT	0.0002	-99.9	24.75	0.0025	0	17.9027
813	KRSFIEDLLFN	Sequence	KRFIEDLLF	KRSFIEDLLF	0.0016	-99.9	26.6328	53	LFLPFFSNVTW	LPFFSNVTW	LFLPFFSNVTW	0.0002	-99.9	24.75	0.0006	0	24.75
215	LPQGFSAL	Sequence	LPQ-GFSAL	LPQGFSAL	0.0016	-99.9	26.661	39	DKVFRSSVL	DKVFRSSVL	DKVFRSSVL	0.0002	-99.9	24.8333	0.0123	0	8.8651
1040	DFCGKGYHL	Sequence	DFCGKGYHL	DFCGKGYHL	0.0016	-99.9	26.7006	47	LHSTQDLF	#NAME?	LHSTQDLF	0.0002	-99.9	24.8333	0.0042	0	14.4019
1071	EKNFTTAPAI	Sequence	EKFTTAPAI	EKNFTTAPAI	0.0016	-99.9	26.7006	1217	LGFIAGLIAI	LGFAGLIAI	LGFIAGLIAI	0.0002	-99.9	24.8333	0.0012	0	23.8754
954	NAQALNTLVK	Sequence	NQALNTLVK	NAQALNTLVK	0.0016	-99.9	26.7401	686	VASQSIIA	VASQSIIA-	VASQSIIA	0.0002	-99.9	24.8333	0.0007	0	24.8333
36	YYPDKVFRS	Sequence	YYPDKVFRS	YYPDKVFRS	0.0016	-99.9	26.8644	248	LTPGDSSSG	LTPGDSSSG	LTPGDSSSG	0.0002	-99.9	24.8333	0.0005	0	24.8333
1193	NESLIDLQE	Sequence	NESLIDLQE	NESLIDLQE	0.0016	-99.9	26.8983	1216	WLGFIAGLI	WLGFIAGLI	WLGFIAGLI	0.0002	-99.9	24.8333	0.0005	0	24.8333
931	GKIQDSLSST	Sequence	GKIDSLSST	GKIQDSLSST	0.0016	-99.9	26.9322	11	SSQCVNLTT	SSQCVNLTT	SSQCVNLTT	0.0002	-99.9	24.8333	0.0002	0	24.8333
162	ANNCTFEYV	Sequence	ANNCTFEYV	ANNCTFEYV	0.0015	-99.9	27	962	VKQLSSNF	#NAME?	VKQLSSNF	0.0002	-99.9	24.9167	0.0512	0	3.8939
908	IGVTQNVL	Sequence	IGV-TQNVL	IGVTQNVL	0.0015	-99.9	27.0263	446	GNYNYLYRLF	GNYNYLYLF	GNYNYLYRLF	0.0002	-99.9	24.9167	0.0176	0	7.3778
276	LKYNENGT	Sequence	LKYNENGT-	LKYNENGT	0.0015	-99.9	27.0461	348	SVYAWNRK	SVYAW-NRK	SVYAWNRK	0.0002	-99.9	24.9167	0.0003	0	24.9167
687	ASQSIIAYT	Sequence	ASQSIIAYT	ASQSIIAYT	0.0015	-99.9	27.0724	948	QDVVNQNAQAL	QVNQNAQAL	QDVVNQNAQAL	0.0002	-99.9	24.9167	0.0003	0	24.9167
325	IVRFPNIT	Sequence	IVRFPNIT-	IVRFPNIT	0.0015	-99.9	27.0724	801	FSQILPDPS	FSQILPDPS	FSQILPDPS	0.0002	-99.9	24.9167	0.0002	0	24.9167
12	SQCVNLTTRT	Sequence	SQVNLTTRT	SQCVNLTTRT	0.0015	-99.9	27.0855	1157	NHTSPDVDL	NHTSPDVDL	NHTSPDVDL	0.0002	-99.9	25	0.0065	0	11.9545
422	YKLPDDFT	Sequence	YKLPDDFT-	YKLPDDFT	0.0015	-99.9	27.0987	1016	EIRASANL	EIR-ASANL	EIRASANL	0.0002	-99.9	25	0.0007	0	25
798	GFNFSQIL	Sequence	G-FNFSQIL	GFNFSQIL	0.0015	-99.9	27.1579	703	SVAYSNNS	SVAYSNNS-	SVAYSNNS	0.0002	-99.9	25	0.0002	0	25
1098	GTHWFVTQRNF	Sequence	GTFVTQRNF	GTHWFVTQRNF	0.0015	-99.9	27.1711	365	SVLYNSAS	SVLYNSAS-	SVLYNSAS	0.0002	-99.9	25	0.0002	0	25
295	LSETKCTLKSF	Sequence	SETKTLKSF	SETKCTLKSF	0.0015	-99.9	27.1974	579	QTLEILDIT	QTLEILDIT	QTLEILDIT	0.0002	-99.9	25	0.0001	0	25
68	HVSGTNGTK	Sequence	HVSGTNGTK	HVSGTNGTK	0.0015	-99.9	27.2105	346	FASVYAWNRK	FASVYANRK	FASVYAWNRK	0.0002	-99.9	25	0.0001	0	25
1176	VNIQKEIDRL	Sequence	VNIQEIDRL	VNIQKEIDRL	0.0015	-99.9	27.2368	1202	LGKYEQYIKW	LGYEQYIKW	LGKYEQYIKW	0.0002	-99.9	25.0833	0.0105	0	9.5563
1037	KRVDFCGKG	Sequence	KRVDFCGKG	KRVDFCGKG	0.0015	-99.9	27.2368	235	TRFQTLLALH	TRFQTLLAL	TRFQTLLAL	0.0002	-99.9	25.0833	0.0087	0	10.4611
246	SYLTPGDSS	Sequence	SYLTPGDSS	SYLTPGDSS	0.0015	-99.9	27.2566	324	SIVRFPNI	SIVRFPNI-	SIVRFPNI	0.0002	-99.9	25.0833	0.0003	0	25.0833
332	TNLCPFGEV	Sequence	TNLCPFGEV	TNLCPFGEV	0.0015	-99.9	27.3026	14	CVNLTTRTQ	CVNLTTRTQ	CVNLTTRTQ	0.0002	-99.9	25.0833	0.0002	0	25.0833
1227	VMVTIMLCCM	Sequence	VMVTIMLCM	VMVTIMLCCM	0.0015	-99.9	27.3158	719	ISVTTEILP	ISVTTEILP	ISVTTEILP	0.0002	-99.9	25.0833	0.0001	0	25.0833
1171	INASVVNIQ	Sequence	INASVVNIQ	INASVVNIQ	0.0015	-99.9	27.3224	1167	DISGINASVV	DISGNASVV	DISGINASVV	0.0002	-99.9	25.0833	0.0001	0	25.0833
145	HKNNKSWME	Sequence	HKNNKSWME	HKNNKSWME	0.0015	-99.9	27.3355	339	EVFNATRFASV	EVFNATASV	EVFNATRFASV	0.0002	-99.9	25.0833	0.0001	0	25.0833
58	FSNVTWFHA	Sequence	FSNVTWFHA	FSNVTWFHA	0.0015	-99.9	27.3618	42	FRSSVLHST	FRSSVLHST	FRSSVLHST	0.0001	-99.9	25.1667	0.0147	0	8.1164
931	GKIQDSLSSTA	Sequence	GKIQDSLTA	GKIQDSLSSTA	0.0015	-99.9	27.3618	905	FNGIGVTQNV	FGIGVTQNV	FNGIGVTQNV	0.0001	-99.9	25.1667	0.0003	0	25.1667
1181	EIDRLNEV	Sequence	#NAME?	EIDRLNEV	0.0015	-99.9	27.3947	512	LSFELLHA	LSFE-LLHA	LSFELLHA	0.0001	-99.9	25.1667	0.0003	0	25.1667
967	SNFGAISS	Sequence	SNFGAISS-	SNFGAISS	0.0015	-99.9	27.3947	272	RTFLLKYNE	RTFLLKYNE	RTFLLKYNE	0.0001	-99.9	25.1667	0.0002	0	25.1667
932	KIQDSLSST	Sequence	KIQDSLSST	KIQDSLSST	0.0015	-99.9	27.4013	174	FLMDLEGK	FLMD-LEGK	FLMDLEGK	0.0001	-99.9	25.1667	0.0002	0	25.1667
754	QYGSFCTQL	Sequence	QYGSFCTQL	QYGSFCTQL	0.0015	-99.9	27.4013	344	TRFASVYAWN	TRFASVYAW	TRFASVYAW	0.0001	-99.9	25.25	0.0085	0	10.5823
1188	VAKNLNESLI	Sequence	VKNLNESLI	VAKNLNESLI	0.0015	-99.9	27.4079	0	MFVFLVLLPL	MVFLVLLPL	MFVFLVLLPL	0.0001	-99.9	25.25	0.001	0	25.25
381	VSPTKLNDL	Sequence	VSPTKLNDL	VSPTKLNDL	0.0015	-99.9	27.4342	7	LPLVSSQCV	LPLVSSQCV	LPLVSSQCV	0.0001	-99.9	25.25	0.0003	0	25.25
161	SANNCTFEYV	Sequence	SANNCTFEY	SANNCTFEY	0.0015	-99.9	27.4342	261	AAAYYVGYLQ	AAYYVGYLQ	AAAYYVGYLQ	0.0001	-99.9	25.25	0.0002	0	25.25
491	LQSYGFQPTN	Sequence	LQYGFQPTN	LQSYGFQPTN	0.0015	-99.9	27.4342	927	NSAIGKIQDSL	NSAIGKISL	NSAIGKIQDSL	0.0001	-99.9	25.25	0.0001	0	25.25
962	VKQLSSNFG	Sequence	VKQLSSNFG	VKQLSSNFG	0.0015	-99.9	27.4671	1118	NTFVSGNCDV	NTFVSGNDV	NTFVSGNCDV	0.0001	-99.9	25.25	0.0001	0	25.25
673	YQTQTNSPRR	Sequence	YQQTNSPRR	YQTQTNSPRR	0.0015	-99.9	27.4737	773	QDKNTQEVF	QDKNTQEVF	QDKNTQEVF	0.0001	-99.9	25.3333	0.0861	0	2.6663
1186	NEVAKNLNESL	Sequence	NEVAKNLSL	NEVAKNLNESL	0.0015	-99.9	27.4803	151	WMESEFRVYS	WMESEFRVY	WMESEFRVY	0.0001	-99.9	25.3333	0.0025	0	17.9176
753	LQYGSFCTQLN	Sequence	LQYGSFTQL	LQYGSFCTQL	0.0015	-99.9	27.4934	350	YAWNRKRISN	YAWNKRISN	YAWNRKRISN	0.0001	-99.9	25.3333	0.0001	0	25.3333
987	EAEVQIDRLI	Sequence	AEVQIDRLI	AEVQIDRLI	0.0015	-99.9	27.5066	68	HVSGTNGT	HVSGTNGT-	HVSGTNGT	0.0001	-99.9	25.3333	0.0001	0	25.3333
797	GGFNFSQI	Sequence	GGFNF-SQI	GGFNFSQI	0.0015	-99.9	27.5526	448	YNYLYRLF	YNY-LYRLF	YNYLYRLF	0.0001	-99.9	25.4167	0.0162	0	7.7212
399	FVIRGDEVR	Sequence	FVIRGDEVR	FVIRGDEVR	0.0015	-99.9	27.6053	131	EFQFCNDPF	EFQFCNDPF	EFQFCNDPF	0.0001	-99.9	25.4167	0.0009	0	25.4167
507	YRVVVLSFELL	Sequence	YRVLSFELL	YRVVVLSFELL	0.0015	-99.9	27.6184	936	SLSSTASA	SLSS-TASA	SLSSTASA	0.0001	-99.9	25.4167	0.0005	0	25.4167
681	RRARSVASQS	Sequence	RRASVASQS	RRARSVASQS	0.0015	-99.9	27.6382	489	FPLQSYGFQ	FPLQSYGFQ	FPLQSYGFQ	0.0001	-99.9	25.4167	0.0002	0	25.4167
421	NYKLPDDF	Sequence	NYKLPD-DF	NYKLPDDF	0.0014	-99.9	27.6645	157	RVYSSANNCT	RVYSSANNT	RVYSSANNCT	0.0001	-99.9	25.4167	0.0002	0	25.4167
1131	IVNNTVYDPL	Sequence	IVNNTVYPL	IVNNTVYDPL	0.0014	-99.9	27.6711	955	AQALNTLV	AQA-LNTLV	AQALNTLV	0.0001	-99.9	25.5	0.0185	0	7.2016
194	KNIDGYFKIYS	Sequence	KNIDGFKIY	KNIDGYFKIY	0.0014	-99.9	27.6776	218	GFSALEPLV	GFSALEPLV	GFSALEPLV	0.0001	-99.9	25.5	0.0006	0	25.5
34	GVYYPDKV	Sequence	GVY-YPDKV	GVYYPDKV	0.0014	-99.9	27.6842	241	LALHRSYLT	LALHRSYLT	LALHRSYLT	0.0001	-99.9	25.5	0.0002	0	25.5
118	IVNNATNV	Sequence	IVNNATNV-	IVNNATNV	0.0014	-99.9	27.6974	304	SFTVEKGIYQ	STVEKGIYQ	SFTVEKGIYQ	0.0001	-99.9	25.5	0.0001	0	25.5
338	GEVFNATRFAS	Sequence	GEVFNATRF	GEVFNATRF	0.0014	-99.9	27.7434	1052	PQSAPHGVV	PQSAPHGVV	PQSAPHGVV	0.0001	-99.9	25.5833	0.0102	0	9.6968
843	IAARDLICA	Sequence	IAARDLICA	IAARDLICA	0.0014	-99.9	27.8289	1115	TTDNTFVSG	TTDNTFVSG	TTDNTFVSG	0.0001	-99.9	25.5833	0.0005	0	25.5833
605	NQVAVLYQ	Sequence	NQVAVLYQ-	NQVAVLYQ	0.0014	-99.9	27.8289	816	FIEDLLFNKV	FIEDLLNKV	FIEDLLFNKV	0.0001	-99.9	25.5833	0.0002	0	25.5833
562	QQFGRDIADTT	Sequence	QQFGRDITT	QQFGRDIADTT	0.0014	-99.9	27.8355	374	STFKCYGVS	STFKCYGVS	STFKCYGVS	0.0001	-99.9	25.5833	0.0002	0	25.5833
495	GFQPTNGVGYQ	Sequence	GQPTNGVGY	GFQPTNGVGY	0.0014	-99.9	27.875	767	TGIAVEQDK	TGIAVEQDK	TGIAVEQDK	0.0001	-99.9	25.5833	0.0002	0	25.5833
269	LQPRTFLLKYN	Sequence	LQRTFLLKY	LQPRTFLLKY	0.0014	-99.9	27.8947	347	ASVYAWNRKR	AVYAWNRKR	ASVYAWNRKR	0.0001	-99.9	25.5833	0.0001	0	25.5833
862	PLLTDEMIAQY	Sequence	PLLTDIAQY	PLLTDEMIAQY	0.0014	-99.9	27.9013	1159	TSPDVDLGDI	TSPDVDLGI	TSPDVDLGDI	0.0001	-99.9	25.5833	0.0001	0	25.5833
864	LTDEMIAQYT	Sequence	LTDEMIAQY	LTDEMIAQY	0.0014	-99.9	27.9079	529	STNLVKNKCV	STNLVKNKV	STNLVKNKCV	0.0001	-99.9	25.5833	0.0001	0	25.5833
287	AVDCALDPL	Sequence	AVDCALDPL	AVDCALDPL	0.0014	-99.9	27.9211	496	FQPTNGVGYQP	FQPTNGVGY	FQPTNGVGY	0.0001	-99.9	25.6667	0.0022	0	18.673
961	LVKQLSSNFG	Sequence	LVKQLSSNF	LVKQLSSNF	0.0014	-99.9	27.9671	1130	GIVNNTVYDPL	GIVNNTVYL	GIVNNTVYDPL	0.0001	-99.9	25.6667	0.0001	0	25.6667
96	KSNIIRGWI	Sequence	KSNIIRGWI	KSNIIRGWI	0.0014	-99.9	27.9737	193	FKNIDGYFKI	FKIDGYFKI	FKNIDGYFKI	0.0001	-99.9	25.75	0.0066	0	11.8542
110	DSKTQSLLI	Sequence	DSKTQSLLI	DSKTQSLLI	0.0014	-99.9	28.015	822	FNKVTLADAGF	FVTLADAGF	FNKVTLADAGF	0.0001	-99.9	25.75	0.0007	0	25.75
659	YECDIPIGAG	Sequence	YECDIPIAG	YECDIPIGAG	0.0014	-99.9	28.0376	1184	RLNEVAKNLN	RLNEVAKNL	RLNEVAKNL	0.0001	-99.9	25.75	0.0004	0	25.75
113	TQSLLIVN	Sequence	TQSLLIVN-	TQSLLIVN	0.0014	-99.9	28.1429	1127	VVIGIVNN	VVIGIVNN-	VVIGIVNN	0.0001	-99.9	25.75	0.0003	0	25.75
786	QIYKTPPI	Sequence	#NAME?	QIYKTPPI	0.0014	-99.9	28.1805	225	LVDLPIGI	LV-DLPIGI	LVDLPIGI	0.0001	-99.9	25.75	0.0002	0	25.75
508	RVVVLSFELL	Sequence	RVVVLSFEL	RVVVLSFELL	0.0014	-99.9	28.188	470	EIYQAGSTPC	EIYQAGSTC	EIYQAGSTPC	0.0001	-99.9	25.75	0.0001	0	25.75
762	LNRALTGIA	Sequence	LNRALTGIA	LNRALTGIA	0.0014	-99.9	28.1955	359	NCVADYSVLYN	NVADYSVLY	NCVADYSVLY	0.0001	-99.9	25.75	0.0001	0	25.75
94	TEKSNIIR	Sequence	TEKSNIIR-	TEKSNIIR	0.0014	-99.9	28.3008	180	GKQGNFKNL	GKQGNFKNL	GKQGNFKNL	0.0001	-99.9	25.8333	0.0657	0	3.2986
44	SSVLHSTQDL	Sequence	SSVLHSTQL	SSVLHSTQDL	0.0014	-99.9	28.3383	228	LPIGINITRFQ	LPIGINITQ	LPIGINITRFQ	0.0001	-99.9	25.8333	0.0002	0	25.8333
54	FLPFFSNVT	Sequence	FLPFFSNVT	FLPFFSNVT	0.0014	-99.9	28.3383	908	IGVTQNVL	IGV-TQNVL	IGVTQNVL	0.0001	-99.9	25.9167	0.0008	0	25.9167
501	GVGYQPYRVV	Sequence	GVYQPYRVV	GVGYQPYRVV	0.0013	-99.9	28.3759	681	RRARSVASQS	RARSVASQS	RRARSVASQS	0.0001	-99.9	25.9167	0.0008	0	25.9167
175	LMDLEGKQG	Sequence	LMDLEGKQG	LMDLEGKQG	0.0013	-99.9	28.3835	370	SASFSTFK	SAS-FSTFK	SASFSTFK	0.0001	-99.9	25.9167	0.0001	0	25.9167
168	EYVSQPFL	Sequence	#NAME?	EYVSQPFL	0.0013	-99.9	28.3835	757	SFCTQLNRAL	SFTQLNRAL	SFCTQLNRAL	0.0001	-99.9	26	0.0004	0	26
615	NCTEVPVAI	Sequence	NCTEVPVAI	NCTEVPVAI	0.0013	-99.9	28.406	587	TPCSFGGVSV	TPSFGGVSV	TPCSFGGVSV	0.0001	-99.9	26	0.0002	0	26
241	LALHRSYL	Sequence	LAL-HRSYL	LALHRSYL	0.0013	-99.9	28.4211	886	TFGAGAALQ	TFGAGAALQ	TFGAGAALQ	0.0001	-99.9	26	0.0002	0	26
1107	NFYEPQII	Sequence	NFYEP-QII	NFYEPQII	0.0013	-99.9	28.4361	817	IEDLLFNKV	IEDLLFNKV	IEDLLFNKV	0.0001	-99.9	26.1	0.0098	0	9.8745
1016	EIRASANL	Sequence	#NAME?	EIRASANL	0.0013	-99.9	28.4586	215	LPQGFSALE	LPQGFSALE	LPQGFSALE	0.0001	-99.9	26.1	0.0002	0	26.1
349	VYAWNRKRI	Sequence	VYAWNRKRI	VYAWNRKRI	0.0013	-99.9	28.5113	497	QPTNGVGYQPY	QPTNGVGYY	QPTNGVGYQPY	0.0001	-99.9	26.2	0.0007	0	26.2
18	TTRTQLPPAYT	Sequence	TRTQLPPAY	TTRTQLPPAY	0.0013	-99.9	28.5338	622	AIHADQLTP	AIHADQLTP	AIHADQLTP	0.0001	-99.9	26.2	0.0004	0	26.2
479	CNGVEGFNCY	Sequence	CNVEGFNCY	CNGVEGFNCY	0.0013	-99.9	28.5414	715	TNFTISVTTEI	TTISVTTEI	TNFTISVTTEI	0.0001	-99.9	26.2	0.0002	0	26.2
1182	IDRLNEVA	Sequence	IDR-LNEVA	IDRLNEVA	0.0013	-99.9	28.5639	456	RKSNLKPFER	RSNLKPFER	RKSNLKPFER	0.0001	-99.9	26.2	0.0002	0	26.2
561	FQQFGRDIAD	Sequence	FQFGRDIAD	FQQFGRDIAD	0.0013	-99.9	28.6391	602	NTSNQVAV	NTS-NQVAV	NTSNQVAV	0.0001	-99.9	26.2	0.0002	0	26.2
274	FLLKYNENG	Sequence	FLLKYNENG	FLLKYNENG	0.0013	-99.9	28.6466	135	CNDPFLGVYY	CNDPLGVYY	CNDPFLGVYY	0.0001	-99.9	26.3	0.0021	0	18.992
394	VYADSFVI	Sequence	V-YADSFVI	VYADSFVI	0.0013	-99.9	28.7143	1169	SGINASVV	SGI-NASVV	SGINASVV	0.0001	-99.9	26.3	0.0007	0	26.3
19	TRTQLPPAYTN	Sequence	TRTQLPPAY	TRTQLPPAY	0.0013	-99.9	28.7143	221	ALEPLVDLPI	ALEPVDLPI	ALEPLVDLPI	0.0001	-99.9	26.3	0.0006	0	26.3
885	WTFGAGAA	Sequence	WTFGAGAA-	WTFGAGAA	0.0013	-99.9	28.7293	366	VLYNSASFST	VLYNSASST	VLYNSASFST	0.0001	-99.9	26.3	0.0003	0	26.3
157	RVYSSANN	Sequence	RVYSSANN-	RVYSSANN	0.0013	-99.9	28.782	416	KIADYNYK	KIADY-NYK	KIADYNYK	0.0001	-99.9	26.3	0.0003	0	26.3
1038	RVDFCGKGYH	Sequence	RVDFCGKGY	RVDFCGKGY	0.0013	-99.9	28.7895	476	STPCNGVEG	STPCNGVEG	STPCNGVEG	0.0001	-99.9	26.3	0.0002	0	26.3
764	RALTGIAVEQ	Sequence	RALTGIAVQ	RALTGIAVEQ	0.0013	-99.9	28.797	435	WNSNNLDSK	WNSNNLDSK	WNSNNLDSK	0.0001	-99.9	26.3	0.0002	0	26.3
423	KLPDDFTGC	Sequence	KLPDDFTGC	KLPDDFTGC	0.0013	-99.9	28.8045	848	LICAQKFNGL	LIAQKFNGL	LICAQKFNGL	0.0001	-99.9	26.3	0.0001	0	26.3
309	KGIYQTSNFR	Sequence	KGIYQTSNF	KGIYQTSNF	0.0013	-99.9	28.812	586	ITPCSFGGVSV	ITSFGGVSV	ITPCSFGGVSV	0.0001	-99.9	26.3	0.0001	0	26.3
1052	PQSAPHGVVFL	Sequence	PQAPHGVVF	PQSAPHGVVF	0.0013	-99.9	28.8496	937	LSSTASALGK	LSSTASALK	LSSTASALGK	0.0001	-99.9	26.3	0.0001	0	26.3
315	SNFRVQPTE	Sequence	SNFRVQPTE	SNFRVQPTE	0.0013	-99.9	28.8647	525	GPKKSTNLVK	GPKSTNLVK	GPKKSTNLVK	0.0001	-99.9	26.4	0.0007	0	26.4
837	GDCLGDIAA	Sequence	GDCLGDIAA	GDCLGDIAA	0.0013	-99.9	28.8647	663	IPIGAGICAS	IPIGAGIAS	IPIGAGICAS	0.0001	-99.9	26.4	0.0002	0	26.4
166	TFEYVSQPFLM	Sequence	FEYSQPFLM	FEYVSQPFLM	0.0013	-99.9	28.8722	1023	LAATKMSE	LAATKMSE-	LAATKMSE	0.0001	-99.9	26.4	0.0001	0	26.4
1120	FVSGNCDVVI	Sequence	FVSGNDVVI	FVSGNCDVVI	0.0013	-99.9	28.8797	136	NDPFLGVYYH	NPFLGVYYH	NDPFLGVYYH	0.0001	-99.9	26.5	0.0003	0	26.5
527	KKSTNLVK	Sequence	KKS-TNLVK	KKSTNLVK	0.0013	-99.9	28.8872	986	VEAEVQIDRL	VEAEVQIRL	VEAEVQIDRL	0.0001	-99.9	26.6	0.0173	0	7.4461
1036	SKRVDFCGK	Sequence	SKRVDFCGK	SKRVDFCGK	0.0013	-99.9	28.9173	771	VEQDKNTQEV	VQDKNTQEV	VEQDKNTQEV	0.0001	-99.9	26.6	0.0078	0	11.0034
245	RSYLTPGDS	Sequence	RSYLTPGDS	RSYLTPGDS	0.0013	-99.9	28.9474	1218	GFIAGLIAIVM	GFIAGAIVM	GFIAGLIAIVM	0.0001	-99.9	26.6	0.0006	0	26.6
325	IVRFPNITNLC	Sequence	IRFPNITNL	IVRFPNITNL	0.0013	-99.9	29.0244	282	GTITDAVDC	GTITDAVDC	GTITDAVDC	0.0001	-99.9	26.6	0.0002	0	26.6
233	NITRFQTLL	Sequence	NITRFQTLL	NITRFQTLL	0.0013	-99.9	29.0894	16	NLTTRTQL	NLT-TRTQL	NLTTRTQL	0.0001	-99.9	26.7	0.0003	0	26.7
686	VASQSIIA	Sequence	VASQSIIA-	VASQSIIA	0.0013	-99.9	29.0894	960	TLVKQLSSN	TLVKQLSSN	TLVKQLSSN	0.0001	-99.9	26.7	0.0002	0	26.7
527	KKSTNLVKN	Sequence	KKSTNLVKN	KKSTNLVKN	0.0013	-99.9	29.0894	106	GTTLDSKTQSL	GTDSKTQSL	GTTLDSKTQSL	0.0001	-99.9	26.7	0.0001	0	26.7
1169	SGINASVV	Sequence	SGI-NASVV	SGINASVV	0.0012	-99.9	29.1707	307	VEKGIYQTSNF	VGIYQTSNF	VEKGIYQTSNF	0.0001	-99.9	26.8	0.0586	0	3.5672
1206	EQYIKWPWYIW	Sequence	EQYIPWYIW	EQYIKWPWYIW	0.0012	-99.9	29.1707	778	QEVFAQVKQI	QVFAQVKQI	QEVFAQVKQI	0.0001	-99.9	26.8	0.0036	0	15.4194
876	LLAGTITS	Sequence	LLAGTITS-	LLAGTITS	0.0012	-99.9	29.1789	228	LPIGINIT	LPIGINIT-	LPIGINIT	0.0001	-99.9	26.8	0.0005	0	26.8
875	ALLAGTITSG	Sequence	ALLAGTTSG	ALLAGTITSG	0.0012	-99.9	29.1951	1008	TQQLIRAAEI	TQQLIAAEI	TQQLIRAAEI	0.0001	-99.9	26.9	0.0028	0	17.0405
871	QYTSALLA	Sequence	#NAME?	QYTSALLA	0.0012	-99.9	29.2033	48	HSTQDLFL	HSTQD-LFL	HSTQDLFL	0.0001	-99.9	26.9	0.0002	0	26.9
822	FNKVTLADAGF	Sequence	FNKLADAGF	FNKVTLADAGF	0.0012	-99.9	29.2114	947	LQDVVNQNA	LQDVVNQNA	LQDVVNQNA	0.0001	-99.9	27	0.0163	0	7.701
665	IGAGICASYQ	Sequence	IGAGICASY	IGAGICASY	0.0012	-99.9	29.2276	470	EIYQAGST	EIYQAGST-	EIYQAGST	0.0001	-99.9	27	0.0003	0	27
1224	IAIVMVTIML	Sequence	IAIMVTIML	IAIVMVTIML	0.0012	-99.9	29.2439	1168	ISGINASV	IS-GINASV	ISGINASV	0.0001	-99.9	27	0.0002	0	27
510	VVLSFELL	Sequence	VVL-SFELL	VVLSFELL	0.0012	-99.9	29.2764	379	YGVSPTKLN	YGVSPTKLN	YGVSPTKLN	0.0001	-99.9	27	0.0002	0	27
926	FNSAIGKIQ	Sequence	FNSAIGKIQ	FNSAIGKIQ	0.0012	-99.9	29.3008	643	QTRAGCLIG	QTRAGCLIG	QTRAGCLIG	0.0001	-99.9	27	0.0002	0	27
461	KPFERDIS	Sequence	KPFERDIS-	KPFERDIS	0.0012	-99.9	29.4309	597	ITPGTNTSNQV	ITPGTNTSV	ITPGTNTSNQV	0.0001	-99.9	27	0.0001	0	27
213	RDLPQGFS	Sequence	RDLPQGFS-	RDLPQGFS	0.0012	-99.9	29.439	156	FRVYSSANNC	FVYSSANNC	FRVYSSANNC	0.0001	-99.9	27.1111	0.001	0	25.3
621	VAIHADQLT	Sequence	VAIHADQLT	VAIHADQLT	0.0012	-99.9	29.4553	39	DKVFRSSVLH	DVFRSSVLH	DKVFRSSVLH	0.0001	-99.9	27.1111	0.0002	0	27.1111
986	VEAEVQIDRLI	Sequence	VEAEVQILI	VEAEVQIDRLI	0.0012	-99.9	29.4553	331	ITNLCPFGEV	ITNLPFGEV	ITNLCPFGEV	0.0001	-99.9	27.1111	0.0002	0	27.1111
1027	KMSECVLGQ	Sequence	KMSECVLGQ	KMSECVLGQ	0.0012	-99.9	29.5122	1208	YIKWPWYI	YIK-WPWYI	YIKWPWYI	0.0001	-99.9	27.1111	0.0001	0	27.1111
306	TVEKGIYQTS	Sequence	TEKGIYQTS	TVEKGIYQTS	0.0012	-99.9	29.5122	397	DSFVIRGDEV	DSFVIGDEV	DSFVIRGDEV	0.0001	-99.9	27.1111	0.0001	0	27.1111
497	QPTNGVGYQPY	Sequence	QPTNGVGYY	QPTNGVGYQPY	0.0012	-99.9	29.5203	76	KRFDNPVLPFN	KRFDNPVLF	KRFDNPVLPF	0.0001	-99.9	27.2222	0.0201	0	6.8663
707	SNNSIAIPT	Sequence	SNNSIAIPT	SNNSIAIPT	0.0012	-99.9	29.5285	410	APGQTGKIA	APGQTGKIA	APGQTGKIA	0.0001	-99.9	27.2222	0.0009	0	26.3955
101	RGWIFGTTLD	Sequence	RGWIFGTTL	RGWIFGTTL	0.0012	-99.9	29.5854	149	KSWMESEFRV	KSMESEFRV	KSWMESEFRV	0.0001	-99.9	27.2222	0.0003	0	27.2222
1099	THWFVTQRN	Sequence	THWFVTQRN	THWFVTQRN	0.0012	-99.9	29.5854	1077	APAICHDGK	APAICHDGK	APAICHDGK	0.0001	-99.9	27.2222	0.0001	0	27.2222
1094	FVSNGTHWFV	Sequence	FVSNGTHWF	FVSNGTHWF	0.0012	-99.9	29.5935	779	EVFAQVKQIYK	EVFAVKQIY	EVFAQVKQIY	0.0001	-99.9	27.2222	0.0001	0	27.2222
679	SPRRARSVAS	Sequence	SRRARSVAS	SPRRARSVAS	0.0012	-99.9	29.5935	491	LQSYGFQPT	LQSYGFQPT	LQSYGFQPT	0.0001	-99.9	27.3333	0.0125	0	8.8099
902	AYRFNGIGVTQ	Sequence	AYRGIGVTQ	AYRFNGIGVTQ	0.0012	-99.9	29.6016	1163	VDLGDISGI	VDLGDISGI	VDLGDISGI	0.0001	-99.9	27.3333	0.0085	0	10.5718
452	YRLFRKSNLK	Sequence	YRFRKSNLK	YRLFRKSNLK	0.0012	-99.9	29.6423	1067	VPAQEKNF	VPAQEKN-F	VPAQEKNF	0.0001	-99.9	27.3333	0.0019	0	19.8155
119	VNNATNVV	Sequence	VNN-ATNVV	VNNATNVV	0.0012	-99.9	29.6423	142	VYYHKNNKS	VYYHKNNKS	VYYHKNNKS	0.0001	-99.9	27.3333	0.0011	0	24.3625
1222	GLIAIVMVTI	Sequence	GLIAIVMTI	GLIAIVMVTI	0.0012	-99.9	29.6504	1107	NFYEPQII	NFYEPQI-I	NFYEPQII	0.0001	-99.9	27.3333	0.0007	0	27.3333
422	YKLPDDFTGCV	Sequence	YKLPDDFTV	YKLPDDFTGCV	0.0012	-99.9	29.6667	479	CNGVEGFNCY	CGVEGFNCY	CNGVEGFNCY	0.0001	-99.9	27.4444	0.0007	0	27.4444
83	LPFNDGVYFAS	Sequence	LPFNDGVYF	LPFNDGVYF	0.0012	-99.9	29.6748	392	TNVYADSFV	TNVYADSFV	TNVYADSFV	0.0001	-99.9	27.4444	0.0004	0	27.4444
1001	QSLQTYVTQ	Sequence	QSLQTYVTQ	QSLQTYVTQ	0.0012	-99.9	29.6911	417	IADYNYKLP	IADYNYKLP	IADYNYKLP	0.0001	-99.9	27.4444	0.0001	0	27.4444
467	ISTEIYQAG	Sequence	ISTEIYQAG	ISTEIYQAG	0.0012	-99.9	29.6911	1066	YVPAQEKNFT	YVPAQEKNF	YVPAQEKNF	0.0001	-99.9	27.4444	0.0001	0	27.4444
424	LPDDFTGCV	Sequence	LPDDFTGCV	LPDDFTGCV	0.0012	-99.9	29.7073	1042	CGKGYHLMSF	CGKGHLMSF	CGKGYHLMSF	0.0001	-99.9	27.5556	0.0088	0	10.4373
565	GRDIADTT	Sequence	GRDIADTT-	GRDIADTT	0.0012	-99.9	29.7154	406	VRQIAPGQT	VRQIAPGQT	VRQIAPGQT	0.0001	-99.9	27.5556	0.0019	0	19.8333
1150	ELDKYFKNH	Sequence	ELDKYFKNH	ELDKYFKNH	0.0012	-99.9	29.7967	88	GVYFASTEKS	GVYASTEKS	GVYFASTEKS	0.0001	-99.9	27.5556	0.0001	0	27.5556
525	GPKKSTNLVK	Sequence	GKKSTNLVK	GPKKSTNLVK	0.0012	-99.9	29.8049	688	SQSIIAYTMS	SQSIIAYTM	SQSIIAYTM	0.0001	-99.9	27.6667	0.0102	0	9.7093
266	VGYLQPRT	Sequence	VGYLQPRT-	VGYLQPRT	0.0012	-99.9	29.8211	955	AQALNTLVKQ	AALNTLVKQ	AQALNTLVKQ	0.0001	-99.9	27.6667	0.0039	0	14.8365
197	DGYFKIYSK	Sequence	DGYFKIYSK	DGYFKIYSK	0.0012	-99.9	29.8374	1101	WFVTQRNF	WFV-TQRNF	WFVTQRNF	0.0001	-99.9	27.6667	0.0018	0	20.2454
380	GVSPTKLNDL	Sequence	GVSPTKLNL	GVSPTKLNDL	0.0012	-99.9	29.8537	233	NITRFQTL	NIT-RFQTL	NITRFQTL	0.0001	-99.9	27.6667	0.0003	0	27.6667
234	ITRFQTLL	Sequence	ITR-FQTLL	ITRFQTLL	0.0012	-99.9	29.878	391	FTNVYADSFVI	FTYADSFVI	FTNVYADSFVI	0.0001	-99.9	27.6667	0.0002	0	27.6667
550	VLTESNKKFL	Sequence	VLTESNKKF	VLTESNKKF	0.0012	-99.9	29.878	756	GSFCTQLNRA	GSFTQLNRA	GSFCTQLNRA	0.0001	-99.9	27.6667	0.0001	0	27.6667
729	SMTKTSVDC	Sequence	SMTKTSVDC	SMTKTSVDC	0.0012	-99.9	29.8943	1134	NTVYDPLQPE	NTYDPLQPE	NTVYDPLQPE	0.0001	-99.9	27.6667	0.0001	0	27.6667
235	TRFQTLLALHR	Sequence	TRFQTLLAL	TRFQTLLAL	0.0012	-99.9	29.9106	1158	HTSPDVDLGDI	HTSPDVDLI	HTSPDVDLGDI	0.0001	-99.9	27.6667	0.0001	0	27.6667
578	PQTLEILDI	Sequence	PQTLEILDI	PQTLEILDI	0.0011	-99.9	29.9268	714	PTNFTISVT	PTNFTISVT	PTNFTISVT	0.0001	-99.9	27.6667	0.0001	0	27.6667
1018	RASANLAATK	Sequence	RAANLAATK	RASANLAATK	0.0011	-99.9	29.9431	576	RDPQTLEIL	RDPQTLEIL	RDPQTLEIL	0.0001	-99.9	27.7778	0.0084	0	10.6661
804	ILPDPSKPS	Sequence	ILPDPSKPS	ILPDPSKPS	0.0011	-99.9	29.9675	175	LMDLEGKQGNF	LMDLEGGNF	LMDLEGKQGNF	0.0001	-99.9	27.7778	0.0022	0	18.6746
19	TRTQLPPA	Sequence	TRTQLPPA-	TRTQLPPA	0.0011	-99.9	29.9837	845	ARDLICAQK	ARDLICAQK	ARDLICAQK	0.0001	-99.9	27.7778	0.0015	0	21.6351
935	DSLSSTASAL	Sequence	SLSSTASAL	SLSSTASAL	0.0011	-99.9	30	671	ASYQTQTN	ASYQTQTN-	ASYQTQTN	0.0001	-99.9	27.7778	0.0005	0	27.7778
921	LIANQFNSAI	Sequence	LANQFNSAI	LIANQFNSAI	0.0011	-99.9	30.0594	970	GAISSVLNDIL	GAISSVLNL	GAISSVLNDIL	0.0001	-99.9	27.7778	0.0003	0	27.7778
684	RSVASQSIIA	Sequence	RVASQSIIA	RSVASQSIIA	0.0011	-99.9	30.0693	1128	VIGIVNNTVYD	VIIVNNTVY	VIGIVNNTVY	0.0001	-99.9	27.7778	0.0002	0	27.7778
920	KLIANQFNS	Sequence	KLIANQFNS	KLIANQFNS	0.0011	-99.9	30.0693	414	TGKIADYNYKL	TIADYNYKL	TGKIADYNYKL	0.0001	-99.9	27.7778	0.0001	0	27.7778
1135	TVYDPLQP	Sequence	TVYDPLQP-	TVYDPLQP	0.0011	-99.9	30.0891	472	YQAGSTPCN	YQAGSTPCN	YQAGSTPCN	0.0001	-99.9	27.8889	0.0038	0	14.9529
5	VLLPLVSS	Sequence	VLLPLVSS-	VLLPLVSS	0.0011	-99.9	30.1089	849	ICAQKFNGLTV	IQKFNGLTV	ICAQKFNGLTV	0.0001	-99.9	27.8889	0.0026	0	17.6446
1074	FTTAPAICH	Sequence	FTTAPAICH	FTTAPAICH	0.0011	-99.9	30.1188	1078	PAICHDGKAHF	PAIDGKAHF	PAICHDGKAHF	0.0001	-99.9	27.8889	0.0006	0	27.8889
844	AARDLICAQK	Sequence	AARDLIAQK	AARDLICAQK	0.0011	-99.9	30.1287	1049	MSFPQSAPHG	MSFPQSAPH	MSFPQSAPH	0.0001	-99.9	27.8889	0.0005	0	27.8889
245	RSYLTPGDSS	Sequence	RSYLPGDSS	RSYLTPGDSS	0.0011	-99.9	30.1881	939	STASALGK	STA-SALGK	STASALGK	0.0001	-99.9	28	0.0001	0	28
222	LEPLVDLPIGI	Sequence	LEVDLPIGI	LEPLVDLPIGI	0.0011	-99.9	30.1881	238	QTLLALHRS	QTLLALHRS	QTLLALHRS	0.0001	-99.9	28	0.0001	0	28
1029	SECVLGQSKR	Sequence	SEVLGQSKR	SECVLGQSKR	0.0011	-99.9	30.1881	231	GINITRFQT	GINITRFQT	GINITRFQT	0.0001	-99.9	28	0.0001	0	28
632	WRVYSTGSN	Sequence	WRVYSTGSN	WRVYSTGSN	0.0011	-99.9	30.2178	36	YYPDKVFRSSV	YYPDKRSSV	YYPDKVFRSSV	0.0001	-99.9	28	0.0001	0	28
1199	LQELGKYEQYI	Sequence	LQLGKYEQY	LQELGKYEQY	0.0011	-99.9	30.2178	35	VYYPDKVFRS	VYYPDVFRS	VYYPDKVFRS	0.0001	-99.9	28.1111	0.0003	0	28.1111
460	LKPFERDIST	Sequence	LKFERDIST	LKPFERDIST	0.0011	-99.9	30.2277	158	VYSSANNCT	VYSSANNCT	VYSSANNCT	0.0001	-99.9	28.1111	0.0002	0	28.1111
189	REFVFKNIDG	Sequence	REFVFKNIG	REFVFKNIDG	0.0011	-99.9	30.2277	371	ASFSTFKCYG	ASFSTFKCY	ASFSTFKCY	0.0001	-99.9	28.2222	0.0015	0	21.7865
761	QLNRALTGIAV	Sequence	QRALTGIAV	QLNRALTGIAV	0.0011	-99.9	30.2376	542	FNGLTGTGV	FNGLTGTGV	FNGLTGTGV	0.0001	-99.9	28.2222	0.0013	0	22.8716
53	LFLPFFSNVTW	Sequence	LFLPSNVTW	LFLPFFSNVTW	0.0011	-99.9	30.2475	492	QSYGFQPT	QSYGFQPT-	QSYGFQPT	0.0001	-99.9	28.2222	0.001	0	25.0667
512	LSFELLHAP	Sequence	LSFELLHAP	LSFELLHAP	0.0011	-99.9	30.2574	671	ASYQTQTNSP	ASYQTTNSP	ASYQTQTNSP	0.0001	-99.9	28.2222	0.0002	0	28.2222
986	VEAEVQID	Sequence	VEAEVQID-	VEAEVQID	0.0011	-99.9	30.2871	1092	GVFVSNGT	GVFVSNGT-	GVFVSNGT	0.0001	-99.9	28.2222	0.0001	0	28.2222
987	EAEVQIDRL	Sequence	EAEVQIDRL	EAEVQIDRL	0.0011	-99.9	30.3069	10	VSSQCVNLT	VSSQCVNLT	VSSQCVNLT	0.0001	-99.9	28.2222	0.0001	0	28.2222
930	IGKIQDSLSS	Sequence	IKIQDSLSS	IGKIQDSLSS	0.0011	-99.9	30.3564	1015	AEIRASANLA	AIRASANLA	AEIRASANLA	0.0001	-99.9	28.3333	0.0056	0	12.7367
294	PLSETKCTL	Sequence	PLSETKCTL	PLSETKCTL	0.0011	-99.9	30.3663	1088	FPREGVFVSN	FPRGVFVSN	FPREGVFVSN	0.0001	-99.9	28.3333	0.0002	0	28.3333
928	SAIGKIQDS	Sequence	SAIGKIQDS	SAIGKIQDS	0.0011	-99.9	30.3762	769	IAVEQDKNTQ	IAVEQKNTQ	IAVEQDKNTQ	0.0001	-99.9	28.3333	0.0001	0	28.3333
33	RGVYYPDKVFR	Sequence	RVYYPDKVF	RGVYYPDKVF	0.0011	-99.9	30.4158	1170	GINASVVNIQ	GIASVVNIQ	GINASVVNIQ	0.0001	-99.9	28.3333	0.0001	0	28.3333
369	NSASFSTFKCY	Sequence	NSASFSTFY	NSASFSTFKCY	0.0011	-99.9	30.4356	1105	QRNFYEPQI	QRNFYEPQI	QRNFYEPQI	0.0001	-99.9	28.4444	0.0282	0	5.6728
923	ANQFNSAI	Sequence	ANQ-FNSAI	ANQFNSAI	0.0011	-99.9	30.4356	875	ALLAGTITSG	ALAGTITSG	ALLAGTITSG	0.0001	-99.9	28.4444	0.0007	0	28.4444
637	TGSNVFQTR	Sequence	TGSNVFQTR	TGSNVFQTR	0.0011	-99.9	30.4455	922	IANQFNSAIG	IANFNSAIG	IANQFNSAIG	0.0001	-99.9	28.4444	0.0002	0	28.4444
470	EIYQAGSTP	Sequence	EIYQAGSTP	EIYQAGSTP	0.0011	-99.9	30.4455	555	NKKFLPFQQF	NKFLPFQQF	NKKFLPFQQF	0.0001	-99.9	28.5556	0.0966	0	2.4036
1218	GFIAGLIAIVM	Sequence	GFIAGAIVM	GFIAGLIAIVM	0.0011	-99.9	30.4554	897	FAMQMAYRFN	FAMQMAYRF	FAMQMAYRF	0.0001	-99.9	28.5556	0.0009	0	26.113
1067	VPAQEKNFTTA	Sequence	VQEKNFTTA	VPAQEKNFTTA	0.0011	-99.9	30.4752	1150	ELDKYFKNH	ELDKYFKNH	ELDKYFKNH	0.0001	-99.9	28.5556	0.0006	0	28.5556
565	GRDIADTTDAV	Sequence	GRADTTDAV	GRDIADTTDAV	0.0011	-99.9	30.495	1047	HLMSFPQSAPH	HSFPQSAPH	HLMSFPQSAPH	0.0001	-99.9	28.5556	0.0005	0	28.5556
1153	KYFKNHTS	Sequence	KYFKNHTS-	KYFKNHTS	0.0011	-99.9	30.495	28	TNSFTRGVYYP	TSFTRGVYY	TNSFTRGVYY	0.0001	-99.9	28.5556	0.0002	0	28.5556
1155	FKNHTSPDVDL	Sequence	FKNSPDVDL	FKNHTSPDVDL	0.0011	-99.9	30.505	643	QTRAGCLI	QTR-AGCLI	QTRAGCLI	0.0001	-99.9	28.5556	0.0002	0	28.5556
804	ILPDPSKPSK	Sequence	IPDPSKPSK	ILPDPSKPSK	0.0011	-99.9	30.5248	23	LPPAYTNSFTR	LPYTNSFTR	LPPAYTNSFTR	0.0001	-99.9	28.5556	0.0001	0	28.5556
616	CTEVPVAIHA	Sequence	TEVPVAIHA	TEVPVAIHA	0.0011	-99.9	30.5347	31	FTRGVYYPDK	FTRGVYYDK	FTRGVYYPDK	0.0001	-99.9	28.5556	0.0001	0	28.5556
595	SVITPGTNTS	Sequence	SVIPGTNTS	SVITPGTNTS	0.0011	-99.9	30.5446	748	CSNLLLQY	CSN-LLLQY	CSNLLLQY	0.0001	-99.9	28.6667	0.0016	0	21.0811
422	YKLPDDFTGC	Sequence	YKLPDFTGC	YKLPDDFTGC	0.0011	-99.9	30.5446	706	YSNNSIAIPT	YSNNSIAIT	YSNNSIAIPT	0.0001	-99.9	28.6667	0.0002	0	28.6667
348	SVYAWNRKRI	Sequence	SVYAWNRKI	SVYAWNRKRI	0.0011	-99.9	30.5545	1086	AHFPREGVFV	AHFPEGVFV	AHFPREGVFV	0.0001	-99.9	28.7778	0.0178	0	7.3286
1090	REGVFVSNGT	Sequence	REVFVSNGT	REGVFVSNGT	0.0011	-99.9	30.5545	1021	ANLAATKM	#NAME?	ANLAATKM	0.0001	-99.9	28.7778	0.0073	0	11.3186
420	YNYKLPDDFT	Sequence	YNYKLPDDF	YNYKLPDDF	0.0011	-99.9	30.5644	1201	ELGKYEQY	EL-GKYEQY	ELGKYEQY	0.0001	-99.9	28.7778	0.0058	0	12.5877
58	FSNVTWFHAI	Sequence	FSNVTFHAI	FSNVTWFHAI	0.0011	-99.9	30.5842	769	IAVEQDKNT	IAVEQDKNT	IAVEQDKNT	0.0001	-99.9	28.7778	0.0003	0	28.7778
514	FELLHAPATVC	Sequence	FEHAPATVC	FELLHAPATVC	0.0011	-99.9	30.604	342	NATRFASV	NAT-RFASV	NATRFASV	0.0001	-99.9	28.7778	0.0001	0	28.7778
456	RKSNLKPFE	Sequence	RKSNLKPFE	RKSNLKPFE	0.0011	-99.9	30.6436	804	ILPDPSKPSKR	ILPDPPSKR	ILPDPSKPSKR	0.0001	-99.9	28.7778	0.0001	0	28.7778
1121	VSGNCDVVI	Sequence	VSGNCDVVI	VSGNCDVVI	0.0011	-99.9	30.6832	440	LDSKVGGNYNY	DSVGGNYNY	DSKVGGNYNY	0.0001	-99.9	28.8889	0.0347	0	5.0006
1086	AHFPREGVFVS	Sequence	AHFPREGVF	AHFPREGVF	0.0011	-99.9	30.6931	1207	QYIKWPWY	QYIKWPW-Y	QYIKWPWY	0.0001	-99.9	28.8889	0.0039	0	14.8922
956	QALNTLVKQL	Sequence	QALNTLVQL	QALNTLVKQL	0.0011	-99.9	30.703	641	VFQTRAGCL	VFQTRAGCL	VFQTRAGCL	0.0001	-99.9	28.8889	0.0005	0	28.8889
323	ESIVRFPNI	Sequence	ESIVRFPNI	ESIVRFPNI	0.0011	-99.9	30.7129	1122	SGNCDVVIGI	SGNDVVIGI	SGNCDVVIGI	0.0001	-99.9	28.8889	0.0004	0	28.8889
1188	VAKNLNES	Sequence	VAKNLNES-	VAKNLNES	0.0011	-99.9	30.7525	133	QFCNDPFLGV	QFNDPFLGV	QFCNDPFLGV	0.0001	-99.9	28.8889	0.0003	0	28.8889
1049	MSFPQSAP	Sequence	MSFPQSAP-	MSFPQSAP	0.0011	-99.9	30.7723	1034	GQSKRVDF	GQS-KRVDF	GQSKRVDF	0.0001	-99.9	29	0.0859	0	2.6722
255	SGWTAGAA	Sequence	SGWTAGAA-	SGWTAGAA	0.0011	-99.9	30.7822	1000	LQSLQTYVT	LQSLQTYVT	LQSLQTYVT	0.0001	-99.9	29	0.009	0	10.2889
218	GFSALEPLV	Sequence	GFSALEPLV	GFSALEPLV	0.0011	-99.9	30.7921	1040	DFCGKGYHL	DFCGKGYHL	DFCGKGYHL	0.0001	-99.9	29	0.0009	0	26.7006
116	LLIVNNATN	Sequence	LLIVNNATN	LLIVNNATN	0.0011	-99.9	30.802	985	KVEAEVQIDR	KVAEVQIDR	KVEAEVQIDR	0.0001	-99.9	29	0.0005	0	29
97	SNIIRGWIFG	Sequence	SNIIRGWIF	SNIIRGWIF	0.0011	-99.9	30.8416	174	FLMDLEGKQG	FLMDEGKQG	FLMDLEGKQG	0.0001	-99.9	29	0.0003	0	29
417	IADYNYKL	Sequence	IA-DYNYKL	IADYNYKL	0.0011	-99.9	30.8614	1173	ASVVNIQK	ASV-VNIQK	ASVVNIQK	0.0001	-99.9	29	0.0002	0	29
1173	ASVVNIQKEI	Sequence	ASVVNIQEI	ASVVNIQKEI	0.001	-99.9	30.9109	682	RARSVASQSII	RARSVASQI	RARSVASQSII	0.0001	-99.9	29	0.0002	0	29
548	TGVLTESNKKF	Sequence	TLTESNKKF	TGVLTESNKKF	0.001	-99.9	30.9109	1087	HFPREGVFVS	HPREGVFVS	HFPREGVFVS	0.0001	-99.9	29	0.0002	0	29
1189	AKNLNESLIDL	Sequence	AKNESLIDL	AKNLNESLIDL	0.001	-99.9	30.9307	31	FTRGVYYPDKV	FTRGVPDKV	FTRGVYYPDKV	0.0001	-99.9	29	0.0001	0	29
221	ALEPLVDL	Sequence	AL-EPLVDL	ALEPLVDL	0.001	-99.9	30.9406	152	MESEFRVYS	MESEFRVYS	MESEFRVYS	0.0001	-99.9	29.1429	0.0101	0	9.7536
1255	FDEDDSEPV	Sequence	FDEDDSEPV	FDEDDSEPV	0.001	-99.9	30.9604	232	INITRFQTLL	IITRFQTLL	INITRFQTLL	0.0001	-99.9	29.1429	0.0018	0	20.3287
507	YRVVVLSFE	Sequence	YRVVVLSFE	YRVVVLSFE	0.001	-99.9	30.9604	474	AGSTPCNGV	AGSTPCNGV	AGSTPCNGV	0.0001	-99.9	29.1429	0.0009	0	26.5198
1171	INASVVNI	Sequence	INA-SVVNI	INASVVNI	0.001	-99.9	30.9604	274	FLLKYNENG	FLLKYNENG	FLLKYNENG	0.0001	-99.9	29.1429	0.0007	0	28.6466
557	KFLPFQQFG	Sequence	KFLPFQQFG	KFLPFQQFG	0.001	-99.9	30.9703	690	SIIAYTMS	SIIAYTMS-	SIIAYTMS	0.0001	-99.9	29.1429	0.0004	0	29.1429
673	YQTQTNSPRRA	Sequence	YQTNSPRRA	YQTQTNSPRRA	0.001	-99.9	31	1027	KMSECVLGQ	KMSECVLGQ	KMSECVLGQ	0.0001	-99.9	29.2857	0.0007	0	29.2857
1166	GDISGINA	Sequence	GDISGINA-	GDISGINA	0.001	-99.9	31.0222	756	GSFCTQLNRAL	GSFQLNRAL	GSFCTQLNRAL	0.0001	-99.9	29.2857	0.0003	0	29.2857
844	AARDLICA	Sequence	AARDLICA-	AARDLICA	0.001	-99.9	31.1111	494	YGFQPTNGVG	YGFQPTNVG	YGFQPTNGVG	0.0001	-99.9	29.2857	0.0003	0	29.2857
448	YNYLYRLFR	Sequence	YNYLYRLFR	YNYLYRLFR	0.001	-99.9	31.1333	1201	ELGKYEQYI	ELGKYEQYI	ELGKYEQYI	0.0001	-99.9	29.2857	0.0003	0	29.2857
792	PIKDFGGF	Sequence	#NAME?	PIKDFGGF	0.001	-99.9	31.1778	1162	DVDLGDISGI	DVLGDISGI	DVDLGDISGI	0.0001	-99.9	29.2857	0.0002	0	29.2857
868	MIAQYTSA	Sequence	MIA-QYTSA	MIAQYTSA	0.001	-99.9	31.2111	65	HAIHVSGTNG	HAIHVGTNG	HAIHVSGTNG	0.0001	-99.9	29.2857	0.0001	0	29.2857
114	QSLLIVNNA	Sequence	QSLLIVNNA	QSLLIVNNA	0.001	-99.9	31.2111	463	FERDISTEIYQ	FRDISTEIY	FERDISTEIY	0.0001	-99.9	29.4286	0.0172	0	7.4597
1078	PAICHDGKAHF	Sequence	PAIDGKAHF	PAICHDGKAHF	0.001	-99.9	31.2333	472	YQAGSTPC	YQAGSTP-C	YQAGSTPC	0.0001	-99.9	29.4286	0.0068	0	11.6976
963	KQLSSNFGAIS	Sequence	KQLSSGAIS	KQLSSNFGAIS	0.001	-99.9	31.2556	762	LNRALTGIAV	LRALTGIAV	LNRALTGIAV	0.0001	-99.9	29.4286	0.0061	0	12.3353
601	TNTSNQVAVL	Sequence	TNSNQVAVL	TNTSNQVAVL	0.001	-99.9	31.2889	1107	NFYEPQIITT	NFYEPIITT	NFYEPQIITT	0.0001	-99.9	29.4286	0.0005	0	29.4286
1257	EDDSEPVL	Sequence	#NAME?	EDDSEPVL	0.001	-99.9	31.2889	904	RFNGIGVTQNV	RFNGIGVTV	RFNGIGVTQNV	0.0001	-99.9	29.4286	0.0004	0	29.4286
898	AMQMAYRFNG	Sequence	AQMAYRFNG	AMQMAYRFNG	0.001	-99.9	31.2889	405	EVRQIAPGQ	EVRQIAPGQ	EVRQIAPGQ	0.0001	-99.9	29.4286	0.0003	0	29.4286
221	ALEPLVDLPI	Sequence	ALEPVDLPI	ALEPLVDLPI	0.001	-99.9	31.3	52	DLFLPFFSNV	DLFPFFSNV	DLFLPFFSNV	0.0001	-99.9	29.4286	0.0002	0	29.4286
826	TLADAGFI	Sequence	TLADAGF-I	TLADAGFI	0.001	-99.9	31.3333	120	NNATNVVIKV	NATNVVIKV	NNATNVVIKV	0.0001	-99.9	29.4286	0.0001	0	29.4286
811	PSKRSFIEDL	Sequence	SKRSFIEDL	SKRSFIEDL	0.001	-99.9	31.3556	629	TPTWRVYST	TPTWRVYST	TPTWRVYST	0.0001	-99.9	29.4286	0.0001	0	29.4286
760	TQLNRALTGIA	Sequence	TQLNRALTA	TQLNRALTGIA	0.001	-99.9	31.3667	635	YSTGSNVFQT	YSTGNVFQT	YSTGSNVFQT	0.0001	-99.9	29.4286	0.0001	0	29.4286
364	YSVLYNSA	Sequence	YSV-LYNSA	YSVLYNSA	0.001	-99.9	31.4	464	ERDISTEIYQ	ERDISTEIY	ERDISTEIY	0.0001	-99.9	29.5714	0.0021	0	18.9777
650	IGAEHVNNS	Sequence	IGAEHVNNS	IGAEHVNNS	0.001	-99.9	31.4111	875	ALLAGTIT	ALLAGTIT-	ALLAGTIT	0.0001	-99.9	29.5714	0.0015	0	21.8216
683	ARSVASQSIIA	Sequence	ARASQSIIA	ARSVASQSIIA	0.001	-99.9	31.4111	237	FQTLLALHR	FQTLLALHR	FQTLLALHR	0.0001	-99.9	29.5714	0.0014	0	22.1713
940	TASALGKLQ	Sequence	TASALGKLQ	TASALGKLQ	0.001	-99.9	31.5111	847	DLICAQKF	DLI-CAQKF	DLICAQKF	0.0001	-99.9	29.5714	0.0009	0	26.0169
192	VFKNIDGYFK	Sequence	VFKNIDGYF	VFKNIDGYF	0.001	-99.9	31.5333	548	TGVLTESNKKF	TLTESNKKF	TGVLTESNKKF	0.0001	-99.9	29.5714	0.0006	0	29.5714
938	SSTASALGKL	Sequence	SSASALGKL	SSTASALGKL	0.001	-99.9	31.5556	381	VSPTKLNDLCF	VSPTNDLCF	VSPTKLNDLCF	0.0001	-99.9	29.5714	0.0002	0	29.5714
1088	FPREGVFV	Sequence	FPREGVFV-	FPREGVFV	0.001	-99.9	31.5556	541	NFNGLTGTGV	NFNGTGTGV	NFNGLTGTGV	0.0001	-99.9	29.5714	0.0001	0	29.5714
778	QEVFAQVK	Sequence	QEV-FAQVK	QEVFAQVK	0.001	-99.9	31.5778	824	KVTLADAGFIK	KVADAGFIK	KVTLADAGFIK	0.0001	-99.9	29.5714	0.0001	0	29.5714
337	FGEVFNATR	Sequence	FGEVFNATR	FGEVFNATR	0.001	-99.9	31.6111	730	MTKTSVDCT	MTKTSVDCT	MTKTSVDCT	0.0001	-99.9	29.5714	0.0001	0	29.5714
327	RFPNITNLC	Sequence	RFPNITNLC	RFPNITNLC	0.001	-99.9	31.6222	1006	YVTQQLIR	YVT-QQLIR	YVTQQLIR	0.0001	-99.9	29.5714	0.0001	0	29.5714
619	VPVAIHADQL	Sequence	VPVAIHDQL	VPVAIHADQL	0.001	-99.9	31.6333	1129	IGIVNNTV	IGI-VNNTV	IGIVNNTV	0.0001	-99.9	29.7143	0.0009	0	25.919
494	YGFQPTNG	Sequence	YGFQPTNG-	YGFQPTNG	0.001	-99.9	31.6444	321	PTESIVRF	#NAME?	PTESIVRF	0.0001	-99.9	29.7143	0.0005	0	29.7143
360	CVADYSVL	Sequence	CVAD-YSVL	CVADYSVL	0.001	-99.9	31.6556	608	AVLYQDVNC	AVLYQDVNC	AVLYQDVNC	0.0001	-99.9	29.7143	0.0004	0	29.7143
1172	NASVVNIQK	Sequence	NASVVNIQK	NASVVNIQK	0.001	-99.9	31.6667	1119	TFVSGNCDVV	TFVSGNDVV	TFVSGNCDVV	0.0001	-99.9	29.7143	0.0002	0	29.7143
501	GVGYQPYRV	Sequence	GVGYQPYRV	GVGYQPYRV	0.001	-99.9	31.6667	907	GIGVTQNV	GI-GVTQNV	GIGVTQNV	0.0001	-99.9	29.7143	0.0001	0	29.7143
378	CYGVSPTKL	Sequence	CYGVSPTKL	CYGVSPTKL	0.001	-99.9	31.7	1010	QLIRAAEI	QLI-RAAEI	QLIRAAEI	0.0001	-99.9	29.8571	0.0003	0	29.8571
711	IAIPTNFTIS	Sequence	IAIPTNFTI	IAIPTNFTI	0.001	-99.9	31.7111	441	DSKVGGNYNYL	DSVGGNYNY	DSKVGGNYNY	0.0001	-99.9	29.8571	0.0003	0	29.8571
971	AISSVLNDIL	Sequence	AISSVLNIL	AISSVLNDIL	0.001	-99.9	31.7111	3	FLVLLPLV	FLV-LLPLV	FLVLLPLV	0.0001	-99.9	29.8571	0.0002	0	29.8571
802	SQILPDPSKPS	Sequence	SQIDPSKPS	SQILPDPSKPS	0.001	-99.9	31.7667	1175	VVNIQKEI	VVN-IQKEI	VVNIQKEI	0.0001	-99.9	29.8571	0.0002	0	29.8571
486	NCYFPLQSYG	Sequence	NCYFPLQSY	NCYFPLQSY	0.001	-99.9	31.7778	195	NIDGYFKIYS	NIDGYFKIY	NIDGYFKIY	0.0001	-99.9	29.8571	0.0002	0	29.8571
66	AIHVSGTNG	Sequence	AIHVSGTNG	AIHVSGTNG	0.001	-99.9	31.8111	356	RISNCVADYS	RISNCVADY	RISNCVADY	0.0001	-99.9	29.8571	0.0001	0	29.8571
590	SFGGVSVIT	Sequence	SFGGVSVIT	SFGGVSVIT	0.001	-99.9	31.8111	812	SKRSFIEDLL	SRSFIEDLL	SKRSFIEDLL	0.0001	-99.9	30	0.0096	0	9.9922
962	VKQLSSNFGAI	Sequence	VKSSNFGAI	VKQLSSNFGAI	0.001	-99.9	31.8667	827	LADAGFIK	LAD-AGFIK	LADAGFIK	0.0001	-99.9	30	0.0003	0	30
307	VEKGIYQTSN	Sequence	VEKGIQTSN	VEKGIYQTSN	0.001	-99.9	31.8778	956	QALNTLVK	QAL-NTLVK	QALNTLVK	0.0001	-99.9	30	0.0003	0	30
536	KCVNFNFNGL	Sequence	KVNFNFNGL	KCVNFNFNGL	0.001	-99.9	31.9	622	AIHADQLTPT	AIADQLTPT	AIHADQLTPT	0.0001	-99.9	30	0.0002	0	30
674	QTQTNSPRRA	Sequence	QQTNSPRRA	QTQTNSPRRA	0.001	-99.9	31.9111	275	LLKYNENGT	LLKYNENGT	LLKYNENGT	0.0001	-99.9	30	0.0002	0	30
857	LTVLPPLL	Sequence	LTVLPP-LL	LTVLPPLL	0.001	-99.9	31.9556	1120	FVSGNCDV	FVSGNCD-V	FVSGNCDV	0.0001	-99.9	30	0.0001	0	30
342	NATRFASVYA	Sequence	NATRFASVY	NATRFASVY	0.001	-99.9	31.9778	584	LDITPCSF	#NAME?	LDITPCSF	0.0001	-99.9	30.125	0.0097	0	9.9322
1047	HLMSFPQSAPH	Sequence	HLMSFPQSH	HLMSFPQSAPH	0.0009	-99.9	32	1176	VNIQKEIDRL	VIQKEIDRL	VNIQKEIDRL	0.0001	-99.9	30.125	0.0008	0	27.2368
117	LIVNNATNVV	Sequence	LVNNATNVV	LIVNNATNVV	0.0009	-99.9	32.0116	422	YKLPDDFTGC	YLPDDFTGC	YKLPDDFTGC	0.0001	-99.9	30.125	0.0006	0	30.125
483	EGFNCYFPL	Sequence	EGFNCYFPL	EGFNCYFPL	0.0009	-99.9	32.0233	1263	VLKGVKLH	VLKGVKLH-	VLKGVKLH	0.0001	-99.9	30.125	0.0004	0	30.125
694	YTMSLGAE	Sequence	YTMSLGAE-	YTMSLGAE	0.0009	-99.9	32.0581	82	VLPFNDGV	VLP-FNDGV	VLPFNDGV	0.0001	-99.9	30.125	0.0002	0	30.125
581	LEILDITPCS	Sequence	LEILDITPS	LEILDITPCS	0.0009	-99.9	32.0581	443	KVGGNYNYLYR	KVGGNNYLY	KVGGNYNYLY	0.0001	-99.9	30.125	0.0001	0	30.125
946	KLQDVVNQ	Sequence	KLQDVVNQ-	KLQDVVNQ	0.0009	-99.9	32.0698	858	TVLPPLLTDE	TVLPPLLTE	TVLPPLLTDE	0.0001	-99.9	30.125	0.0001	0	30.125
376	FKCYGVSPTKL	Sequence	FKCYGPTKL	FKCYGVSPTKL	0.0009	-99.9	32.0698	557	KFLPFQQFGR	KFLPFQFGR	KFLPFQQFGR	0.0001	-99.9	30.125	0.0001	0	30.125
671	ASYQTQTN	Sequence	ASYQTQTN-	ASYQTQTN	0.0009	-99.9	32.0814	1099	THWFVTQRNFY	TFVTQRNFY	THWFVTQRNFY	0.0001	-99.9	30.25	0.0121	0	8.9229
1142	PELDSFKEEL	Sequence	PELDSFKEL	PELDSFKEEL	0.0009	-99.9	32.093	1047	HLMSFPQS	HLMSFPQS-	HLMSFPQS	0.0001	-99.9	30.25	0.0034	0	15.658
568	IADTTDAV	Sequence	IA-DTTDAV	IADTTDAV	0.0009	-99.9	32.1163	965	LSSNFGAISSV	LSFGAISSV	LSSNFGAISSV	0.0001	-99.9	30.25	0.0002	0	30.25
653	EHVNNSYEC	Sequence	EHVNNSYEC	EHVNNSYEC	0.0009	-99.9	32.1163	199	YFKIYSKHTPI	YIYSKHTPI	YFKIYSKHTPI	0.0001	-99.9	30.25	0.0002	0	30.25
254	SSGWTAGAA	Sequence	SSGWTAGAA	SSGWTAGAA	0.0009	-99.9	32.1395	103	WIFGTTLDSK	WIFGTTDSK	WIFGTTLDSK	0.0001	-99.9	30.25	0.0001	0	30.25
1072	KNFTTAPA	Sequence	KNFTTAPA-	KNFTTAPA	0.0009	-99.9	32.1512	115	SLLIVNNATNV	SIVNNATNV	SLLIVNNATNV	0.0001	-99.9	30.25	0.0001	0	30.25
171	SQPFLMDLE	Sequence	SQPFLMDLE	SQPFLMDLE	0.0009	-99.9	32.186	984	DKVEAEVQI	DKVEAEVQI	DKVEAEVQI	0.0001	-99.9	30.375	0.0062	0	12.2442
605	NQVAVLYQDV	Sequence	NQVAVLYQV	NQVAVLYQDV	0.0009	-99.9	32.2209	415	GKIADYNYK	GKIADYNYK	GKIADYNYK	0.0001	-99.9	30.375	0.003	0	16.5449
1026	TKMSECVLG	Sequence	TKMSECVLG	TKMSECVLG	0.0009	-99.9	32.2209	469	TEIYQAGSTP	TIYQAGSTP	TEIYQAGSTP	0.0001	-99.9	30.375	0.0019	0	19.6687
154	SEFRVYSSAN	Sequence	SEFRVSSAN	SEFRVYSSAN	0.0009	-99.9	32.2326	1079	AICHDGKAH	AICHDGKAH	AICHDGKAH	0.0001	-99.9	30.375	0.0009	0	25.9952
230	IGINITRFQ	Sequence	IGINITRFQ	IGINITRFQ	0.0009	-99.9	32.2442	539	NFNFNGLTG	NFNFNGLTG	NFNFNGLTG	0.0001	-99.9	30.375	0.0004	0	30.375
1107	NFYEPQIITT	Sequence	NFYEPIITT	NFYEPQIITT	0.0009	-99.9	32.2791	853	KFNGLTVLP	KFNGLTVLP	KFNGLTVLP	0.0001	-99.9	30.375	0.0004	0	30.375
920	KLIANQFNSAI	Sequence	KLIANNSAI	KLIANQFNSAI	0.0009	-99.9	32.3023	672	SYQTQTNSP	SYQTQTNSP	SYQTQTNSP	0.0001	-99.9	30.375	0.0003	0	30.375
344	TRFASVYAWNR	Sequence	TRFASVYAW	TRFASVYAW	0.0009	-99.9	32.3256	955	AQALNTLVKQL	AQALNTKQL	AQALNTLVKQL	0.0001	-99.9	30.5	0.0084	0	10.6197
340	VFNATRFAS	Sequence	VFNATRFAS	VFNATRFAS	0.0009	-99.9	32.3488	47	LHSTQDLFLPF	LTQDLFLPF	LHSTQDLFLPF	0.0001	-99.9	30.5	0.004	0	14.6652
641	VFQTRAGCL	Sequence	VFQTRAGCL	VFQTRAGCL	0.0009	-99.9	32.4419	1193	NESLIDLQEL	NSLIDLQEL	NESLIDLQEL	0.0001	-99.9	30.5	0.0025	0	17.7041
841	GDIAARDL	Sequence	GDI-AARDL	GDIAARDL	0.0009	-99.9	32.4651	445	GGNYNYLYRL	GGNYNYLYL	GGNYNYLYRL	0.0001	-99.9	30.5	0.0004	0	30.5
228	LPIGINIT	Sequence	LPIGINIT-	LPIGINIT	0.0009	-99.9	32.5814	912	QNVLYENQKL	QVLYENQKL	QNVLYENQKL	0.0001	-99.9	30.5	0.0003	0	30.5
717	FTISVTTE	Sequence	FTISVTTE-	FTISVTTE	0.0009	-99.9	32.593	55	LPFFSNVTWFH	LPFFSNVTH	LPFFSNVTWFH	0.0001	-99.9	30.5	0.0002	0	30.5
509	VVVLSFEL	Sequence	VVVLSF-EL	VVVLSFEL	0.0009	-99.9	32.593	734	SVDCTMYI	SV-DCTMYI	SVDCTMYI	0.0001	-99.9	30.5	0.0001	0	30.5
363	DYSVLYNSASF	Sequence	DVLYNSASF	DYSVLYNSASF	0.0009	-99.9	32.6744	937	LSSTASALGKL	LTASALGKL	LSSTASALGKL	0.0001	-99.9	30.5	0.0001	0	30.5
1049	MSFPQSAPHG	Sequence	MSFPQSAPH	MSFPQSAPH	0.0009	-99.9	32.686	1036	SKRVDFCGKGY	SVDFCGKGY	SKRVDFCGKGY	0.0001	-99.9	30.625	0.0149	0	8.0473
858	TVLPPLLT	Sequence	TVLPPLLT-	TVLPPLLT	0.0009	-99.9	32.6977	974	SVLNDILS	SVLNDILS-	SVLNDILS	0.0001	-99.9	30.625	0.0004	0	30.625
62	TWFHAIHV	Sequence	TWFHAIHV-	TWFHAIHV	0.0009	-99.9	32.6977	609	VLYQDVNCTE	VLYQDVNTE	VLYQDVNCTE	0.0001	-99.9	30.625	0.0003	0	30.625
949	DVVNQNAQAL	Sequence	VVNQNAQAL	VVNQNAQAL	0.0009	-99.9	32.7209	253	SSSGWTAGAAA	SSSGAGAAA	SSSGWTAGAAA	0.0001	-99.9	30.625	0.0002	0	30.625
171	SQPFLMDLEG	Sequence	SQFLMDLEG	SQPFLMDLEG	0.0009	-99.9	32.7209	1	FVFLVLLPLV	FVFLVLLPV	FVFLVLLPLV	0.0001	-99.9	30.625	0.0002	0	30.625
694	YTMSLGAEN	Sequence	YTMSLGAEN	YTMSLGAEN	0.0009	-99.9	32.7326	721	VTTEILPV	VTTE-ILPV	VTTEILPV	0.0001	-99.9	30.625	0.0001	0	30.625
680	PRRARSVAS	Sequence	PRRARSVAS	PRRARSVAS	0.0009	-99.9	32.7442	546	TGTGVLTES	TGTGVLTES	TGTGVLTES	0.0001	-99.9	30.625	0.0001	0	30.625
1115	TTDNTFVSG	Sequence	TTDNTFVSG	TTDNTFVSG	0.0009	-99.9	32.7907	884	GWTFGAGAALQ	GTFGAGAAL	GWTFGAGAAL	0.0001	-99.9	30.625	0.0001	0	30.625
611	YQDVNCTE	Sequence	YQDVNCTE-	YQDVNCTE	0.0009	-99.9	32.814	286	DAVDCALDPL	DAVDALDPL	DAVDCALDPL	0.0001	-99.9	30.625	0.0001	0	30.625
952	NQNAQALN	Sequence	NQNAQALN-	NQNAQALN	0.0009	-99.9	32.8488	1023	LAATKMSECVL	LAATKMSEL	LAATKMSECVL	0.0001	-99.9	30.625	0.0001	0	30.625
395	YADSFVIR	Sequence	YADSFVIR-	YADSFVIR	0.0009	-99.9	32.8605	339	EVFNATRFAS	EVFNATRAS	EVFNATRFAS	0.0001	-99.9	30.625	0.0001	0	30.625
385	KLNDLCFTNV	Sequence	KLNDLFTNV	KLNDLCFTNV	0.0009	-99.9	32.9302	397	DSFVIRGDE	DSFVIRGDE	DSFVIRGDE	0.0001	-99.9	30.625	0.0001	0	30.625
1160	SPDVDLGDI	Sequence	SPDVDLGDI	SPDVDLGDI	0.0009	-99.9	32.9419	111	SKTQSLLIV	SKTQSLLIV	SKTQSLLIV	0.0001	-99.9	30.75	0.0328	0	5.1883
248	LTPGDSSSG	Sequence	LTPGDSSSG	LTPGDSSSG	0.0009	-99.9	32.9535	625	ADQLTPTWRV	AQLTPTWRV	ADQLTPTWRV	0.0001	-99.9	30.75	0.0048	0	13.6878
355	KRISNCVAD	Sequence	KRISNCVAD	KRISNCVAD	0.0009	-99.9	32.9651	920	KLIANQFNSAI	KLIANNSAI	KLIANQFNSAI	0.0001	-99.9	30.75	0.0005	0	30.75
32	TRGVYYPDKV	Sequence	TRVYYPDKV	TRGVYYPDKV	0.0009	-99.9	32.9651	357	ISNCVADYSVL	ISVADYSVL	ISNCVADYSVL	0.0001	-99.9	30.75	0.0002	0	30.75
650	IGAEHVNNSYE	Sequence	IGAEHNNSY	IGAEHVNNSY	0.0009	-99.9	32.9884	594	VSVITPGT	VSVITPGT-	VSVITPGT	0.0001	-99.9	30.75	0.0002	0	30.75
376	FKCYGVSPT	Sequence	FKCYGVSPT	FKCYGVSPT	0.0009	-99.9	33	24	PPAYTNSFTR	PAYTNSFTR	PPAYTNSFTR	0.0001	-99.9	30.75	0.0001	0	30.75
1226	IVMVTIMLC	Sequence	IVMVTIMLC	IVMVTIMLC	0.0009	-99.9	33.0658	981	SRLDKVEAE	SRLDKVEAE	SRLDKVEAE	0.0001	-99.9	30.875	0.006	0	12.385
985	KVEAEVQIDR	Sequence	KEAEVQIDR	KVEAEVQIDR	0.0009	-99.9	33.0789	212	VRDLPQGFSA	VRDPQGFSA	VRDLPQGFSA	0.0001	-99.9	30.875	0.0058	0	12.6178
199	YFKIYSKHT	Sequence	YFKIYSKHT	YFKIYSKHT	0.0009	-99.9	33.1053	406	VRQIAPGQTGK	VIAPGQTGK	VRQIAPGQTGK	0.0001	-99.9	30.875	0.001	0	25.1476
266	VGYLQPRTFLL	Sequence	VGYLQPRTL	VGYLQPRTFLL	0.0009	-99.9	33.1184	236	RFQTLLALHR	RFQTLALHR	RFQTLLALHR	0.0001	-99.9	30.875	0.0001	0	30.875
610	LYQDVNCTE	Sequence	LYQDVNCTE	LYQDVNCTE	0.0008	-99.9	33.1711	668	GICASYQTQ	GICASYQTQ	GICASYQTQ	0.0001	-99.9	30.875	0.0001	0	30.875
321	PTESIVRF	Sequence	#NAME?	PTESIVRF	0.0008	-99.9	33.1974	313	QTSNFRVQP	QTSNFRVQP	QTSNFRVQP	0.0001	-99.9	30.875	0.0001	0	30.875
440	LDSKVGGNYN	Sequence	LDSKVGGNY	LDSKVGGNY	0.0008	-99.9	33.2237	160	SSANNCTFE	SSANNCTFE	SSANNCTFE	0.0001	-99.9	30.875	0.0001	0	30.875
1205	YEQYIKWP	Sequence	YEQYIKWP-	YEQYIKWP	0.0008	-99.9	33.2237	87	DGVYFASTE	DGVYFASTE	DGVYFASTE	0.0001	-99.9	30.875	0.0001	0	30.875
770	AVEQDKNTQEV	Sequence	AQDKNTQEV	AVEQDKNTQEV	0.0008	-99.9	33.2368	406	VRQIAPGQTG	VQIAPGQTG	VRQIAPGQTG	0.0001	-99.9	31	0.0261	0	5.9221
264	YYVGYLQPR	Sequence	YYVGYLQPR	YYVGYLQPR	0.0008	-99.9	33.25	354	RKRISNCVADY	RISNCVADY	RKRISNCVADY	0.0001	-99.9	31	0.0217	0	6.5742
965	LSSNFGAIS	Sequence	LSSNFGAIS	LSSNFGAIS	0.0008	-99.9	33.2632	1182	IDRLNEVAK	IDRLNEVAK	IDRLNEVAK	0.0001	-99.9	31	0.0036	0	15.4329
784	VKQIYKTPP	Sequence	VKQIYKTPP	VKQIYKTPP	0.0008	-99.9	33.2632	63	WFHAIHVSG	WFHAIHVSG	WFHAIHVSG	0.0001	-99.9	31	0.0004	0	31
676	QTNSPRRAR	Sequence	QTNSPRRAR	QTNSPRRAR	0.0008	-99.9	33.3158	36	YYPDKVFRSS	YYPDKVFSS	YYPDKVFRSS	0.0001	-99.9	31	0.0002	0	31
1005	TYVTQQLIR	Sequence	TYVTQQLIR	TYVTQQLIR	0.0008	-99.9	33.3553	697	SLGAENSV	SL-GAENSV	SLGAENSV	0.0001	-99.9	31	0.0002	0	31
771	VEQDKNTQ	Sequence	VEQDKNTQ-	VEQDKNTQ	0.0008	-99.9	33.3947	330	NITNLCPF	NIT-NLCPF	NITNLCPF	0.0001	-99.9	31	0.0002	0	31
711	IAIPTNFTISV	Sequence	IAIPTNISV	IAIPTNFTISV	0.0008	-99.9	33.4079	220	SALEPLVDLP	SALEPLVDL	SALEPLVDL	0.0001	-99.9	31	0.0001	0	31
343	ATRFASVYAWN	Sequence	ARFASVYAW	ATRFASVYAW	0.0008	-99.9	33.4474	324	SIVRFPNITN	SVRFPNITN	SIVRFPNITN	0.0001	-99.9	31	0.0001	0	31
540	FNFNGLTG	Sequence	FNF-NGLTG	FNFNGLTG	0.0008	-99.9	33.4474	19	TRTQLPPAYT	TRTQLPPAY	TRTQLPPAY	0.0001	-99.9	31.1667	0.0147	0	8.0947
732	KTSVDCTMYI	Sequence	KTVDCTMYI	KTSVDCTMYI	0.0008	-99.9	33.4868	233	NITRFQTLLAL	NRFQTLLAL	NITRFQTLLAL	0.0001	-99.9	31.1667	0.0046	0	13.8529
454	LFRKSNLKP	Sequence	LFRKSNLKP	LFRKSNLKP	0.0008	-99.9	33.5	502	VGYQPYRVVVL	VGYQPVVVL	VGYQPYRVVVL	0.0001	-99.9	31.1667	0.0012	0	23.2734
64	FHAIHVSG	Sequence	FHAIHVSG-	FHAIHVSG	0.0008	-99.9	33.5263	658	SYECDIPIGA	SYEDIPIGA	SYECDIPIGA	0.0001	-99.9	31.1667	0.0012	0	23.3391
156	FRVYSSAN	Sequence	FRVYSSAN-	FRVYSSAN	0.0008	-99.9	33.5789	306	TVEKGIYQTS	TVKGIYQTS	TVEKGIYQTS	0.0001	-99.9	31.1667	0.0006	0	29.5122
973	SSVLNDIL	Sequence	SSV-LNDIL	SSVLNDIL	0.0008	-99.9	33.6053	112	KTQSLLIV	KTQ-SLLIV	KTQSLLIV	0.0001	-99.9	31.1667	0.0003	0	31.1667
471	IYQAGSTPC	Sequence	IYQAGSTPC	IYQAGSTPC	0.0008	-99.9	33.6316	293	DPLSETKCTL	DLSETKCTL	DPLSETKCTL	0.0001	-99.9	31.1667	0.0002	0	31.1667
1222	GLIAIVMVTIM	Sequence	GLIAIVMVM	GLIAIVMVTIM	0.0008	-99.9	33.6579	26	AYTNSFTR	#NAME?	AYTNSFTR	0.0001	-99.9	31.1667	0.0002	0	31.1667
503	GYQPYRVV	Sequence	G-YQPYRVV	GYQPYRVV	0.0008	-99.9	33.6579	521	ATVCGPKKS	ATVCGPKKS	ATVCGPKKS	0.0001	-99.9	31.1667	0.0001	0	31.1667
201	KIYSKHTPINL	Sequence	KIYSTPINL	KIYSKHTPINL	0.0008	-99.9	33.6711	1063	HVTYVPAQ	HVTYVPAQ-	HVTYVPAQ	0.0001	-99.9	31.1667	0.0001	0	31.1667
725	ILPVSMTKT	Sequence	ILPVSMTKT	ILPVSMTKT	0.0008	-99.9	33.6711	133	QFCNDPFLGVY	QFDPFLGVY	QFCNDPFLGVY	0.0001	-99.9	31.3333	0.0011	0	24.5625
408	QIAPGQTG	Sequence	#NAME?	QIAPGQTG	0.0008	-99.9	33.6842	1188	VAKNLNES	VAK-NLNES	VAKNLNES	0.0001	-99.9	31.3333	0.0006	0	30.7525
1256	DEDDSEPVLK	Sequence	DEDDEPVLK	DEDDSEPVLK	0.0008	-99.9	33.6974	494	YGFQPTNG	YGFQPTNG-	YGFQPTNG	0.0001	-99.9	31.3333	0.0005	0	31.3333
259	AGAAAYYVG	Sequence	AGAAAYYVG	AGAAAYYVG	0.0008	-99.9	33.7368	878	AGTITSGWTFG	ATITSGWTF	AGTITSGWTF	0.0001	-99.9	31.3333	0.0002	0	31.3333
918	NQKLIANQFNS	Sequence	NQKLIANQF	NQKLIANQF	0.0008	-99.9	33.7368	702	NSVAYSNNS	NSVAYSNNS	NSVAYSNNS	0.0001	-99.9	31.3333	0.0001	0	31.3333
399	FVIRGDEV	Sequence	FVI-RGDEV	FVIRGDEV	0.0008	-99.9	33.75	996	ITGRLQSLQ	ITGRLQSLQ	ITGRLQSLQ	0.0001	-99.9	31.3333	0.0001	0	31.3333
639	SNVFQTRAG	Sequence	SNVFQTRAG	SNVFQTRAG	0.0008	-99.9	33.7632	328	FPNITNLCP	FPNITNLCP	FPNITNLCP	0.0001	-99.9	31.3333	0.0001	0	31.3333
1023	LAATKMSEC	Sequence	LAATKMSEC	LAATKMSEC	0.0008	-99.9	33.7895	118	IVNNATNVVIK	IVNNATNVK	IVNNATNVVIK	0.0001	-99.9	31.3333	0.0001	0	31.3333
883	SGWTFGAGAA	Sequence	SGWTFGAAA	SGWTFGAGAA	0.0008	-99.9	33.8026	24	PPAYTNSF	#NAME?	PPAYTNSF	0.0001	-99.9	31.5	0.0012	0	23.3806
580	TLEILDITPC	Sequence	TEILDITPC	TLEILDITPC	0.0008	-99.9	33.8158	565	GRDIADTTDAV	GIADTTDAV	GRDIADTTDAV	0.0001	-99.9	31.5	0.0006	0	30.495
783	QVKQIYKTPPI	Sequence	QQIYKTPPI	QVKQIYKTPPI	0.0008	-99.9	33.8289	879	GTITSGWT	GTITSGWT-	GTITSGWT	0.0001	-99.9	31.5	0.0002	0	31.5
777	TQEVFAQVKQ	Sequence	TQVFAQVKQ	TQEVFAQVKQ	0.0008	-99.9	33.8421	40	KVFRSSVLHS	KVFRSSVLS	KVFRSSVLHS	0.0001	-99.9	31.5	0.0001	0	31.5
526	PKKSTNLVK	Sequence	PKKSTNLVK	PKKSTNLVK	0.0008	-99.9	33.8553	365	SVLYNSASFST	SVLYNSASF	SVLYNSASF	0.0001	-99.9	31.5	0.0001	0	31.5
1147	FKEELDKYFK	Sequence	FKEELDKYF	FKEELDKYF	0.0008	-99.9	33.8684	1012	IRAAEIRAS	IRAAEIRAS	IRAAEIRAS	0.0001	-99.9	31.6667	0.0193	0	7.0118
1017	IRASANLAATK	Sequence	IRASANLTK	IRASANLAATK	0.0008	-99.9	33.8816	426	DDFTGCVIAW	DDFTGVIAW	DDFTGCVIAW	0.0001	-99.9	31.6667	0.0023	0	18.3636
886	TFGAGAALQI	Sequence	TGAGAALQI	TFGAGAALQI	0.0008	-99.9	33.9211	242	ALHRSYLTP	ALHRSYLTP	ALHRSYLTP	0.0001	-99.9	31.6667	0.0013	0	22.8838
402	RGDEVRQI	Sequence	RGDE-VRQI	RGDEVRQI	0.0008	-99.9	33.9211	1171	INASVVNIQ	INASVVNIQ	INASVVNIQ	0.0001	-99.9	31.6667	0.0008	0	27.3224
408	QIAPGQTGK	Sequence	QIAPGQTGK	QIAPGQTGK	0.0008	-99.9	33.9342	818	EDLLFNKVTL	ELLFNKVTL	EDLLFNKVTL	0.0001	-99.9	31.6667	0.0004	0	31.6667
2	VFLVLLPLV	Sequence	VFLVLLPLV	VFLVLLPLV	0.0008	-99.9	33.9342	695	TMSLGAENS	TMSLGAENS	TMSLGAENS	0.0001	-99.9	31.6667	0.0004	0	31.6667
1151	LDKYFKNHTS	Sequence	LKYFKNHTS	LDKYFKNHTS	0.0008	-99.9	33.9342	970	GAISSVLN	GAISSVLN-	GAISSVLN	0.0001	-99.9	31.6667	0.0002	0	31.6667
226	VDLPIGINIT	Sequence	VDLPIGINI	VDLPIGINI	0.0008	-99.9	33.9474	989	EVQIDRLIT	EVQIDRLIT	EVQIDRLIT	0.0001	-99.9	31.6667	0.0001	0	31.6667
1187	EVAKNLNESL	Sequence	VAKNLNESL	VAKNLNESL	0.0008	-99.9	33.9868	952	NQNAQALNT	NQNAQALNT	NQNAQALNT	0.0001	-99.9	31.8333	0.0049	0	13.5472
65	HAIHVSGTN	Sequence	HAIHVSGTN	HAIHVSGTN	0.0008	-99.9	34	538	VNFNFNGL	VNF-NFNGL	VNFNFNGL	0.0001	-99.9	31.8333	0.0043	0	14.3355
1216	WLGFIAGLI	Sequence	WLGFIAGLI	WLGFIAGLI	0.0008	-99.9	34	376	FKCYGVSPTK	FKYGVSPTK	FKCYGVSPTK	0.0001	-99.9	31.8333	0.0015	0	21.6568
451	LYRLFRKSNL	Sequence	LRLFRKSNL	LYRLFRKSNL	0.0008	-99.9	34.0143	729	SMTKTSVDC	SMTKTSVDC	SMTKTSVDC	0.0001	-99.9	31.8333	0.0006	0	29.8943
1166	GDISGINASVV	Sequence	GDISGINAV	GDISGINASVV	0.0008	-99.9	34.0143	557	KFLPFQQFG	KFLPFQQFG	KFLPFQQFG	0.0001	-99.9	31.8333	0.0006	0	30.9703
1154	YFKNHTSPDV	Sequence	YKNHTSPDV	YFKNHTSPDV	0.0008	-99.9	34.1	320	QPTESIVRFP	QPTESIVRF	QPTESIVRF	0.0001	-99.9	31.8333	0.0003	0	31.8333
975	VLNDILSR	Sequence	VLNDILSR-	VLNDILSR	0.0008	-99.9	34.1143	1108	FYEPQIIT	FYEPQIIT-	FYEPQIIT	0.0001	-99.9	31.8333	0.0003	0	31.8333
936	SLSSTASA	Sequence	SLS-STASA	SLSSTASA	0.0008	-99.9	34.1143	295	LSETKCTL	LSE-TKCTL	LSETKCTL	0.0001	-99.9	31.8333	0.0001	0	31.8333
852	QKFNGLTVLPP	Sequence	QKFNGLTVL	QKFNGLTVL	0.0008	-99.9	34.1286	238	QTLLALHRSYL	QTALHRSYL	QTLLALHRSYL	0.0001	-99.9	31.8333	0.0001	0	31.8333
1009	QQLIRAAE	Sequence	QQLIRAAE-	QQLIRAAE	0.0008	-99.9	34.1714	1135	TVYDPLQPELD	TVYDPLQEL	TVYDPLQPEL	0.0001	-99.9	31.8333	0.0001	0	31.8333
400	VIRGDEVRQ	Sequence	VIRGDEVRQ	VIRGDEVRQ	0.0008	-99.9	34.2	282	GTITDAVDCA	GTIDAVDCA	GTITDAVDCA	0.0001	-99.9	31.8333	0.0001	0	31.8333
302	LKSFTVEKG	Sequence	LKSFTVEKG	LKSFTVEKG	0.0008	-99.9	34.2143	910	VTQNVLYEN	VTQNVLYEN	VTQNVLYEN	0.0001	-99.9	31.8333	0.0001	0	31.8333
870	AQYTSALLAGT	Sequence	AQYTSALLT	AQYTSALLAGT	0.0008	-99.9	34.2286	893	LQIPFAMQ	LQIPFAMQ-	LQIPFAMQ	0.0001	-99.9	32	0.0143	0	8.2105
142	VYYHKNNK	Sequence	VYYHKNN-K	VYYHKNNK	0.0008	-99.9	34.2857	1017	IRASANLA	IRASANLA-	IRASANLA	0.0001	-99.9	32	0.0064	0	12.0333
178	LEGKQGNFKNL	Sequence	LEGKQGNNL	LEGKQGNFKNL	0.0008	-99.9	34.3143	1207	QYIKWPWYIW	QYIKPWYIW	QYIKWPWYIW	0.0001	-99.9	32	0.001	0	25.319
904	RFNGIGVTQNV	Sequence	RFNGIGVTV	RFNGIGVTQNV	0.0008	-99.9	34.3429	486	NCYFPLQSYG	NCYFPLQSY	NCYFPLQSY	0.0001	-99.9	32	0.0005	0	31.7778
622	AIHADQLTP	Sequence	AIHADQLTP	AIHADQLTP	0.0008	-99.9	34.3857	187	NLREFVFKNI	NLREFVKNI	NLREFVFKNI	0.0001	-99.9	32	0.0003	0	32
539	NFNFNGLTG	Sequence	NFNFNGLTG	NFNFNGLTG	0.0008	-99.9	34.4	640	NVFQTRAG	NVFQTRAG-	NVFQTRAG	0.0001	-99.9	32	0.0001	0	32
614	VNCTEVPVA	Sequence	VNCTEVPVA	VNCTEVPVA	0.0008	-99.9	34.4714	1039	VDFCGKGYHL	VDFGKGYHL	VDFCGKGYHL	0.0001	-99.9	32.1429	0.0059	0	12.4993
891	AALQIPFA	Sequence	AALQIPFA-	AALQIPFA	0.0007	-99.9	34.5857	67	IHVSGTNGT	IHVSGTNGT	IHVSGTNGT	0.0001	-99.9	32.1429	0.0023	0	18.4817
242	ALHRSYLT	Sequence	ALHRSYLT-	ALHRSYLT	0.0007	-99.9	34.5857	1262	PVLKGVKLH	PVLKGVKLH	PVLKGVKLH	0.0001	-99.9	32.1429	0.0003	0	32.1429
956	QALNTLVKQ	Sequence	QALNTLVKQ	QALNTLVKQ	0.0007	-99.9	34.6143	291	ALDPLSET	AL-DPLSET	ALDPLSET	0.0001	-99.9	32.1429	0.0003	0	32.1429
442	SKVGGNYN	Sequence	SKVGGNYN-	SKVGGNYN	0.0007	-99.9	34.6571	895	IPFAMQMA	IPF-AMQMA	IPFAMQMA	0.0001	-99.9	32.1429	0.0002	0	32.1429
624	HADQLTPTWR	Sequence	HADQLTPTW	HADQLTPTW	0.0007	-99.9	34.7429	316	NFRVQPTES	NFRVQPTES	NFRVQPTES	0.0001	-99.9	32.1429	0.0001	0	32.1429
63	WFHAIHVSG	Sequence	WFHAIHVSG	WFHAIHVSG	0.0007	-99.9	34.7429	645	RAGCLIGAE	RAGCLIGAE	RAGCLIGAE	0.0001	-99.9	32.1429	0.0001	0	32.1429
1184	RLNEVAKNLN	Sequence	RLNEVAKNL	RLNEVAKNL	0.0007	-99.9	34.7857	358	SNCVADYSVL	SNVADYSVL	SNCVADYSVL	0.0001	-99.9	32.2857	0.0023	0	18.4817
959	NTLVKQLSSNF	Sequence	NTKQLSSNF	NTLVKQLSSNF	0.0007	-99.9	34.8143	994	RLITGRLQ	RLITGRLQ-	RLITGRLQ	0.0001	-99.9	32.2857	0.0019	0	19.75
634	VYSTGSNV	Sequence	V-YSTGSNV	VYSTGSNV	0.0007	-99.9	34.8143	295	LSETKCTLKSF	LTKCTLKSF	LSETKCTLKSF	0.0001	-99.9	32.2857	0.0008	0	27.1974
408	QIAPGQTGKI	Sequence	QIAPGQTKI	QIAPGQTGKI	0.0007	-99.9	34.8429	1017	IRASANLAATK	ISANLAATK	IRASANLAATK	0.0001	-99.9	32.2857	0.0004	0	32.2857
1122	SGNCDVVIGI	Sequence	SGNDVVIGI	SGNCDVVIGI	0.0007	-99.9	34.9143	891	AALQIPFA	AALQIPFA-	AALQIPFA	0.0001	-99.9	32.2857	0.0004	0	32.2857
153	ESEFRVYSSA	Sequence	SEFRVYSSA	SEFRVYSSA	0.0007	-99.9	34.9286	722	TTEILPVSMT	TTILPVSMT	TTEILPVSMT	0.0001	-99.9	32.2857	0.0004	0	32.2857
457	KSNLKPFER	Sequence	KSNLKPFER	KSNLKPFER	0.0007	-99.9	34.9571	1047	HLMSFPQSAP	HLMSPQSAP	HLMSFPQSAP	0.0001	-99.9	32.2857	0.0003	0	32.2857
469	TEIYQAGS	Sequence	TEIYQAGS-	TEIYQAGS	0.0007	-99.9	34.9571	1065	TYVPAQEK	TYV-PAQEK	TYVPAQEK	0.0001	-99.9	32.2857	0.0002	0	32.2857
965	LSSNFGAI	Sequence	LSSNFG-AI	LSSNFGAI	0.0007	-99.9	34.9714	863	LLTDEMIAQYT	LLTDEIAQY	LLTDEMIAQY	0.0001	-99.9	32.2857	0.0002	0	32.2857
230	IGINITRFQTL	Sequence	IGINITQTL	IGINITRFQTL	0.0007	-99.9	34.9714	879	GTITSGWTFGA	GTITSGWTF	GTITSGWTF	0.0001	-99.9	32.2857	0.0002	0	32.2857
940	TASALGKL	Sequence	TASALG-KL	TASALGKL	0.0007	-99.9	34.9857	588	PCSFGGVSVI	PSFGGVSVI	PCSFGGVSVI	0.0001	-99.9	32.2857	0.0001	0	32.2857
1263	VLKGVKLH	Sequence	VLK-GVKLH	VLKGVKLH	0.0007	-99.9	34.9857	1076	TAPAICHDGK	TAPAIHDGK	TAPAICHDGK	0.0001	-99.9	32.2857	0.0001	0	32.2857
1080	ICHDGKAHFP	Sequence	ICHDGKAHF	ICHDGKAHF	0.0007	-99.9	34.9857	715	TNFTISVTT	TNFTISVTT	TNFTISVTT	0.0001	-99.9	32.4286	0.0017	0	20.7662
122	ATNVVIKV	Sequence	ATN-VVIKV	ATNVVIKV	0.0007	-99.9	35.0161	408	QIAPGQTG	QIAPGQTG-	QIAPGQTG	0.0001	-99.9	32.4286	0.0004	0	32.4286
37	YPDKVFRS	Sequence	YPDKVFRS-	YPDKVFRS	0.0007	-99.9	35.0806	783	QVKQIYKTP	QVKQIYKTP	QVKQIYKTP	0.0001	-99.9	32.4286	0.0002	0	32.4286
1109	YEPQIITTDNT	Sequence	YEPQIITTT	YEPQIITTDNT	0.0007	-99.9	35.129	1145	DSFKEELDK	DSFKEELDK	DSFKEELDK	0.0001	-99.9	32.4286	0.0001	0	32.4286
696	MSLGAENSVA	Sequence	MSLGANSVA	MSLGAENSVA	0.0007	-99.9	35.1452	607	VAVLYQDVN	VAVLYQDVN	VAVLYQDVN	0.0001	-99.9	32.4286	0.0001	0	32.4286
853	KFNGLTVLP	Sequence	KFNGLTVLP	KFNGLTVLP	0.0007	-99.9	35.1452	597	ITPGTNTSNQ	ITPGTNTSQ	ITPGTNTSNQ	0.0001	-99.9	32.4286	0.0001	0	32.4286
445	GGNYNYLYRL	Sequence	GNYNYLYRL	GGNYNYLYRL	0.0007	-99.9	35.1452	432	VIAWNSNN	VIAWNSNN-	VIAWNSNN	0.0001	-99.9	32.4286	0.0001	0	32.4286
1222	GLIAIVMV	Sequence	GLI-AIVMV	GLIAIVMV	0.0007	-99.9	35.1452	91	FASTEKSNIIR	FASTSNIIR	FASTEKSNIIR	0.0001	-99.9	32.4286	0.0001	0	32.4286
513	SFELLHAPAT	Sequence	SELLHAPAT	SFELLHAPAT	0.0007	-99.9	35.1452	171	SQPFLMDL	SQ-PFLMDL	SQPFLMDL	0.0001	-99.9	32.5714	0.0078	0	10.9589
335	CPFGEVFNA	Sequence	CPFGEVFNA	CPFGEVFNA	0.0007	-99.9	35.1774	136	NDPFLGVY	N-DPFLGVY	NDPFLGVY	0.0001	-99.9	32.5714	0.0053	0	12.9868
1109	YEPQIITTDN	Sequence	YEPQIITTN	YEPQIITTDN	0.0007	-99.9	35.2419	166	TFEYVSQPFL	TFYVSQPFL	TFEYVSQPFL	0.0001	-99.9	32.5714	0.004	0	14.7702
690	SIIAYTMS	Sequence	SIIAYTMS-	SIIAYTMS	0.0007	-99.9	35.2581	147	NNKSWMESEF	NNKSWMSEF	NNKSWMESEF	0.0001	-99.9	32.5714	0.0035	0	15.6139
370	SASFSTFKC	Sequence	SASFSTFKC	SASFSTFKC	0.0007	-99.9	35.2742	1050	SFPQSAPHGVV	SQSAPHGVV	SFPQSAPHGVV	0.0001	-99.9	32.5714	0.0011	0	23.8685
773	QDKNTQEVFA	Sequence	QDKNTQEVF	QDKNTQEVF	0.0007	-99.9	35.2742	1227	VMVTIMLCCM	VMVTIMLCM	VMVTIMLCCM	0.0001	-99.9	32.5714	0.0008	0	27.3158
392	TNVYADSFV	Sequence	TNVYADSFV	TNVYADSFV	0.0007	-99.9	35.3064	930	IGKIQDSL	IGK-IQDSL	IGKIQDSL	0.0001	-99.9	32.5714	0.0004	0	32.5714
352	WNRKRISNC	Sequence	WNRKRISNC	WNRKRISNC	0.0007	-99.9	35.3548	679	SPRRARSV	SPR-RARSV	SPRRARSV	0.0001	-99.9	32.5714	0.0002	0	32.5714
623	IHADQLTP	Sequence	IHADQLTP-	IHADQLTP	0.0007	-99.9	35.371	226	VDLPIGINITR	VPIGINITR	VDLPIGINITR	0.0001	-99.9	32.5714	0.0002	0	32.5714
881	ITSGWTFGA	Sequence	ITSGWTFGA	ITSGWTFGA	0.0007	-99.9	35.3871	379	YGVSPTKLNDL	YGVSPTKLL	YGVSPTKLNDL	0.0001	-99.9	32.5714	0.0001	0	32.5714
65	HAIHVSGT	Sequence	HAIHVSGT-	HAIHVSGT	0.0007	-99.9	35.4032	625	ADQLTPTW	#NAME?	ADQLTPTW	0.0001	-99.9	32.7143	0.0033	0	15.9262
517	LHAPATVC	Sequence	LHA-PATVC	LHAPATVC	0.0007	-99.9	35.4032	1084	GKAHFPREGV	GAHFPREGV	GKAHFPREGV	0.0001	-99.9	32.7143	0.0014	0	22.2141
1144	LDSFKEELDKY	Sequence	LFKEELDKY	LDSFKEELDKY	0.0007	-99.9	35.4355	1093	VFVSNGTH	VFVSNG-TH	VFVSNGTH	0.0001	-99.9	32.7143	0.0003	0	32.7143
930	IGKIQDSL	Sequence	IGK-IQDSL	IGKIQDSL	0.0007	-99.9	35.4355	997	TGRLQSLQT	TGRLQSLQT	TGRLQSLQT	0.0001	-99.9	32.7143	0.0002	0	32.7143
73	NGTKRFDNPVL	Sequence	NKRFDNPVL	NGTKRFDNPVL	0.0007	-99.9	35.4516	262	AAYYVGYLQP	AAYYVGLQP	AAYYVGYLQP	0.0001	-99.9	32.7143	0.0002	0	32.7143
1011	LIRAAEIRAS	Sequence	LRAAEIRAS	LIRAAEIRAS	0.0007	-99.9	35.4677	836	YGDCLGDIA	YGDCLGDIA	YGDCLGDIA	0.0001	-99.9	32.7143	0.0001	0	32.7143
1038	RVDFCGKGYHL	Sequence	RVDGKGYHL	RVDFCGKGYHL	0.0007	-99.9	35.4839	1022	NLAATKMS	NLAATKMS-	NLAATKMS	0.0001	-99.9	32.7143	0.0001	0	32.7143
181	KQGNFKNLRE	Sequence	KQNFKNLRE	KQGNFKNLRE	0.0007	-99.9	35.4839	6	LLPLVSSQCV	LLPLVSSQV	LLPLVSSQCV	0.0001	-99.9	32.7143	0.0001	0	32.7143
202	IYSKHTPIN	Sequence	IYSKHTPIN	IYSKHTPIN	0.0007	-99.9	35.5161	1174	SVVNIQKEID	SVVNIQEID	SVVNIQKEID	0.0001	-99.9	32.7143	0.0001	0	32.7143
353	NRKRISNCVA	Sequence	NRKRISNVA	NRKRISNCVA	0.0007	-99.9	35.5161	462	PFERDISTEI	FERDISTEI	FERDISTEI	0.0001	-99.9	32.8571	0.0055	0	12.8132
617	TEVPVAIHAD	Sequence	TEVPVAIHA	TEVPVAIHA	0.0007	-99.9	35.5484	1206	EQYIKWPWYI	EQYIKPWYI	EQYIKWPWYI	0.0001	-99.9	32.8571	0.0011	0	23.9377
1064	VTYVPAQE	Sequence	VTYVPAQE-	VTYVPAQE	0.0007	-99.9	35.5806	926	FNSAIGKIQ	FNSAIGKIQ	FNSAIGKIQ	0.0001	-99.9	32.8571	0.0007	0	29.3008
1114	ITTDNTFVS	Sequence	ITTDNTFVS	ITTDNTFVS	0.0007	-99.9	35.6129	1085	KAHFPREGVFV	KAHFPGVFV	KAHFPREGVFV	0.0001	-99.9	32.8571	0.0004	0	32.8571
1216	WLGFIAGLIA	Sequence	WLFIAGLIA	WLGFIAGLIA	0.0007	-99.9	35.629	888	GAGAALQI	GA-GAALQI	GAGAALQI	0.0001	-99.9	32.8571	0.0002	0	32.8571
337	FGEVFNATRFA	Sequence	FEVFNATRF	FGEVFNATRF	0.0007	-99.9	35.6452	1202	LGKYEQYIK	LGKYEQYIK	LGKYEQYIK	0.0001	-99.9	32.8571	0.0002	0	32.8571
1085	KAHFPREGVFV	Sequence	KAFPREGVF	KAHFPREGVF	0.0007	-99.9	35.6774	61	VTWFHAIHVS	VTFHAIHVS	VTWFHAIHVS	0.0001	-99.9	32.8571	0.0001	0	32.8571
37	YPDKVFRSSV	Sequence	YPDKVFRSV	YPDKVFRSSV	0.0007	-99.9	35.7097	716	NFTISVTTE	NFTISVTTE	NFTISVTTE	0.0001	-99.9	32.8571	0.0001	0	32.8571
265	YVGYLQPRTFL	Sequence	YVYLQPRTF	YVGYLQPRTF	0.0007	-99.9	35.7097	125	VVIKVCEFQ	VVIKVCEFQ	VVIKVCEFQ	0.0001	-99.9	32.8571	0.0001	0	32.8571
610	LYQDVNCTEV	Sequence	LQDVNCTEV	LYQDVNCTEV	0.0007	-99.9	35.7097	602	NTSNQVAVLYQ	NTSNVAVLY	NTSNQVAVLY	0.0001	-99.9	32.8571	0.0001	0	32.8571
854	FNGLTVLPPL	Sequence	FNLTVLPPL	FNGLTVLPPL	0.0007	-99.9	35.7258	1181	EIDRLNEVAK	EIRLNEVAK	EIDRLNEVAK	0.0001	-99.9	32.8571	0.0001	0	32.8571
461	KPFERDISTE	Sequence	KPFEDISTE	KPFERDISTE	0.0007	-99.9	35.7419	676	QTNSPRRARS	QTNSPRRAS	QTNSPRRARS	0.0001	-99.9	32.8571	0.0001	0	32.8571
194	KNIDGYFK	Sequence	KNIDGYFK-	KNIDGYFK	0.0007	-99.9	35.7419	140	LGVYYHKNNK	LGYYHKNNK	LGVYYHKNNK	0.0001	-99.9	32.8571	0.0001	0	32.8571
1019	ASANLAAT	Sequence	ASANLAAT-	ASANLAAT	0.0007	-99.9	35.7742	873	TSALLAGTIT	TSALAGTIT	TSALLAGTIT	0.0001	-99.9	32.8571	0.0001	0	32.8571
1103	VTQRNFYEPQ	Sequence	VQRNFYEPQ	VTQRNFYEPQ	0.0007	-99.9	35.7742	919	QKLIANQF	#NAME?	QKLIANQF	0.0001	-99.9	33	0.0646	0	3.3355
116	LLIVNNATNV	Sequence	LLIVNNATV	LLIVNNATNV	0.0007	-99.9	35.8064	581	LEILDITPCSF	LLDITPCSF	LEILDITPCSF	0.0001	-99.9	33	0.0246	0	6.1269
1136	VYDPLQPE	Sequence	VYDPLQPE-	VYDPLQPE	0.0007	-99.9	35.8226	466	DISTEIYQA	DISTEIYQA	DISTEIYQA	0.0001	-99.9	33	0.0002	0	33
1054	SAPHGVVFLH	Sequence	SAPHGVVLH	SAPHGVVFLH	0.0007	-99.9	35.8387	541	NFNGLTGTG	NFNGLTGTG	NFNGLTGTG	0.0001	-99.9	33	0.0001	0	33
595	SVITPGTN	Sequence	SVITPGTN-	SVITPGTN	0.0007	-99.9	35.871	597	ITPGTNTS	ITPGTNTS-	ITPGTNTS	0.0001	-99.9	33	0.0001	0	33
485	FNCYFPLQSYG	Sequence	FNYFPLQSY	FNCYFPLQSY	0.0007	-99.9	35.871	705	AYSNNSIAIP	ASNNSIAIP	AYSNNSIAIP	0.0001	-99.9	33	0.0001	0	33
1091	EGVFVSNGTHW	Sequence	GVFSNGTHW	GVFVSNGTHW	0.0007	-99.9	35.8871	44	SSVLHSTQD	SSVLHSTQD	SSVLHSTQD	0.0001	-99.9	33	0.0001	0	33
1145	DSFKEELDKYF	Sequence	DSFKEDKYF	DSFKEELDKYF	0.0007	-99.9	35.8871	1118	NTFVSGNCDVV	NTFVSGNVV	NTFVSGNCDVV	0.0001	-99.9	33	0.0001	0	33
41	VFRSSVLH	Sequence	VFR-SSVLH	VFRSSVLH	0.0007	-99.9	35.8871	124	NVVIKVCEFQ	NVVIKVCEF	NVVIKVCEF	0.0001	-99.9	33	0.0001	0	33
791	PPIKDFGGFNF	Sequence	IKDFGGFNF	IKDFGGFNF	0.0007	-99.9	35.8871	724	EILPVSMTKT	EILPVSMTT	EILPVSMTKT	0.0001	-99.9	33	0.0001	0	33
202	IYSKHTPI	Sequence	I-YSKHTPI	IYSKHTPI	0.0007	-99.9	35.9032	212	VRDLPQGFS	VRDLPQGFS	VRDLPQGFS	0.0001	-99.9	33.2	0.0011	0	23.9862
739	MYICGDSTE	Sequence	MYICGDSTE	MYICGDSTE	0.0007	-99.9	35.9194	797	GGFNFSQI	GGF-NFSQI	GGFNFSQI	0.0001	-99.9	33.2	0.0008	0	27.5526
1199	LQELGKYE	Sequence	LQELGKYE-	LQELGKYE	0.0007	-99.9	35.9194	325	IVRFPNITNLC	IVFPNITNL	IVRFPNITNL	0.0001	-99.9	33.2	0.0007	0	29.0244
1169	SGINASVVN	Sequence	SGINASVVN	SGINASVVN	0.0007	-99.9	35.9355	230	IGINITRFQTL	IGINITQTL	IGINITRFQTL	0.0001	-99.9	33.2	0.0004	0	33.2
721	VTTEILPVS	Sequence	VTTEILPVS	VTTEILPVS	0.0007	-99.9	35.9839	301	TLKSFTVE	TLKSFTVE-	TLKSFTVE	0.0001	-99.9	33.2	0.0003	0	33.2
818	EDLLFNKVTL	Sequence	ELLFNKVTL	EDLLFNKVTL	0.0007	-99.9	35.9839	340	VFNATRFASV	VFNATRASV	VFNATRFASV	0.0001	-99.9	33.2	0.0003	0	33.2
89	VYFASTEK	Sequence	VYF-ASTEK	VYFASTEK	0.0007	-99.9	36.0545	204	SKHTPINL	SKH-TPINL	SKHTPINL	0.0001	-99.9	33.4	0.0219	0	6.5269
1029	SECVLGQSKRV	Sequence	SELGQSKRV	SECVLGQSKRV	0.0007	-99.9	36.0727	1178	IQKEIDRLN	IQKEIDRLN	IQKEIDRLN	0.0001	-99.9	33.4	0.0054	0	12.9713
406	VRQIAPGQ	Sequence	VRQIAPGQ-	VRQIAPGQ	0.0007	-99.9	36.0727	211	LVRDLPQGFSA	LVRPQGFSA	LVRDLPQGFSA	0.0001	-99.9	33.4	0.0002	0	33.4
399	FVIRGDEVRQI	Sequence	FRGDEVRQI	FVIRGDEVRQI	0.0006	-99.9	36.0909	81	PVLPFNDGV	PVLPFNDGV	PVLPFNDGV	0.0001	-99.9	33.4	0.0001	0	33.4
600	GTNTSNQVAV	Sequence	GTNSNQVAV	GTNTSNQVAV	0.0006	-99.9	36.1455	1067	VPAQEKNFTT	VPAEKNFTT	VPAQEKNFTT	0.0001	-99.9	33.4	0.0001	0	33.4
826	TLADAGFIKQ	Sequence	TLADGFIKQ	TLADAGFIKQ	0.0006	-99.9	36.1455	518	HAPATVCGPK	HAPATVGPK	HAPATVCGPK	0.0001	-99.9	33.4	0.0001	0	33.4
889	AGAALQIPFA	Sequence	AGAALQIPF	AGAALQIPF	0.0006	-99.9	36.1455	1106	RNFYEPQIIT	RFYEPQIIT	RNFYEPQIIT	0.0001	-99.9	33.6	0.0012	0	23.5017
625	ADQLTPTWR	Sequence	ADQLTPTWR	ADQLTPTWR	0.0006	-99.9	36.1636	883	SGWTFGAGAA	SGWTFGAAA	SGWTFGAGAA	0.0001	-99.9	33.6	0.0004	0	33.6
1029	SECVLGQS	Sequence	SECVLGQS-	SECVLGQS	0.0006	-99.9	36.1636	433	IAWNSNNLD	IAWNSNNLD	IAWNSNNLD	0.0001	-99.9	33.6	0.0002	0	33.6
974	SVLNDILS	Sequence	SVLNDILS-	SVLNDILS	0.0006	-99.9	36.1818	815	SFIEDLLFN	SFIEDLLFN	SFIEDLLFN	0.0001	-99.9	33.6	0.0002	0	33.6
115	SLLIVNNA	Sequence	SLLIVNNA-	SLLIVNNA	0.0006	-99.9	36.1818	637	TGSNVFQTRA	TSNVFQTRA	TGSNVFQTRA	0.0001	-99.9	33.6	0.0002	0	33.6
817	IEDLLFNK	Sequence	IEDLLFNK-	IEDLLFNK	0.0006	-99.9	36.1818	227	DLPIGINIT	DLPIGINIT	DLPIGINIT	0.0001	-99.9	33.6	0.0001	0	33.6
277	KYNENGTITDA	Sequence	KENGTITDA	KYNENGTITDA	0.0006	-99.9	36.2	357	ISNCVADYSV	ISNCVADSV	ISNCVADYSV	0.0001	-99.9	33.6	0.0001	0	33.6
538	VNFNFNGLTG	Sequence	VNFNNGLTG	VNFNFNGLTG	0.0006	-99.9	36.2	433	IAWNSNNLDSK	IAWNSNNSK	IAWNSNNLDSK	0.0001	-99.9	33.6	0.0001	0	33.6
167	FEYVSQPFLMD	Sequence	FEYVSQPLM	FEYVSQPFLM	0.0006	-99.9	36.2545	654	HVNNSYECDI	HVNNSYEDI	HVNNSYECDI	0.0001	-99.9	33.6	0.0001	0	33.6
544	GLTGTGVLT	Sequence	GLTGTGVLT	GLTGTGVLT	0.0006	-99.9	36.2727	621	VAIHADQLTP	VAIADQLTP	VAIHADQLTP	0.0001	-99.9	33.6	0.0001	0	33.6
116	LLIVNNAT	Sequence	LLIVNNAT-	LLIVNNAT	0.0006	-99.9	36.2727	745	STECSNLL	ST-ECSNLL	STECSNLL	0.0001	-99.9	33.6	0.0001	0	33.6
720	SVTTEILPVSM	Sequence	SVTTEPVSM	SVTTEILPVSM	0.0006	-99.9	36.2909	21	TQLPPAYTNS	TLPPAYTNS	TQLPPAYTNS	0.0001	-99.9	33.8	0.003	0	16.4335
772	EQDKNTQEVFA	Sequence	EQDKNTQVF	EQDKNTQEVF	0.0006	-99.9	36.2909	905	FNGIGVTQ	F-NGIGVTQ	FNGIGVTQ	0.0001	-99.9	33.8	0.0002	0	33.8
871	QYTSALLAG	Sequence	QYTSALLAG	QYTSALLAG	0.0006	-99.9	36.3455	1220	IAGLIAIV	IA-GLIAIV	IAGLIAIV	0.0001	-99.9	33.8	0.0002	0	33.8
608	AVLYQDVNC	Sequence	AVLYQDVNC	AVLYQDVNC	0.0006	-99.9	36.3455	374	STFKCYGVSP	STFKYGVSP	STFKCYGVSP	0.0001	-99.9	33.8	0.0001	0	33.8
179	EGKQGNFKNL	Sequence	EKQGNFKNL	EGKQGNFKNL	0.0006	-99.9	36.3636	1219	FIAGLIAIVMV	FIAGAIVMV	FIAGLIAIVMV	0.0001	-99.9	33.8	0.0001	0	33.8
133	QFCNDPFL	Sequence	#NAME?	QFCNDPFL	0.0006	-99.9	36.3636	117	LIVNNATN	LIVNNATN-	LIVNNATN	0.0001	-99.9	33.8	0.0001	0	33.8
695	TMSLGAENS	Sequence	TMSLGAENS	TMSLGAENS	0.0006	-99.9	36.3818	846	RDLICAQKF	RDLICAQKF	RDLICAQKF	0.0001	-99.9	34	0.04	0	4.5443
913	NVLYENQKLI	Sequence	NLYENQKLI	NVLYENQKLI	0.0006	-99.9	36.4	1180	KEIDRLNEVA	KEIDRLNVA	KEIDRLNEVA	0.0001	-99.9	34	0.0136	0	8.4097
1024	AATKMSECVL	Sequence	AATKMSEVL	AATKMSECVL	0.0006	-99.9	36.4364	1169	SGINASVVN	SGINASVVN	SGINASVVN	0.0001	-99.9	34	0.0004	0	34
1055	APHGVVFLHV	Sequence	AHGVVFLHV	APHGVVFLHV	0.0006	-99.9	36.4364	227	DLPIGINI	DL-PIGINI	DLPIGINI	0.0001	-99.9	34	0.0002	0	34
874	SALLAGTITS	Sequence	SLLAGTITS	SALLAGTITS	0.0006	-99.9	36.4364	638	GSNVFQTR	GSN-VFQTR	GSNVFQTR	0.0001	-99.9	34	0.0002	0	34
722	TTEILPVSMT	Sequence	TEILPVSMT	TTEILPVSMT	0.0006	-99.9	36.4364	1054	SAPHGVVFLHV	SAPHGVVHV	SAPHGVVFLHV	0.0001	-99.9	34	0.0001	0	34
302	LKSFTVEKGI	Sequence	LKFTVEKGI	LKSFTVEKGI	0.0006	-99.9	36.4727	872	YTSALLAG	YTSALLAG-	YTSALLAG	0.0001	-99.9	34	0.0001	0	34
495	GFQPTNGVG	Sequence	GFQPTNGVG	GFQPTNGVG	0.0006	-99.9	36.4909	564	FGRDIADTTD	FGRDIATTD	FGRDIADTTD	0.0001	-99.9	34	0.0001	0	34
283	TITDAVDCAL	Sequence	TITDAVDAL	TITDAVDCAL	0.0006	-99.9	36.5091	702	NSVAYSNNSIA	NAYSNNSIA	NSVAYSNNSIA	0.0001	-99.9	34	0.0001	0	34
624	HADQLTPTWRV	Sequence	HQLTPTWRV	HADQLTPTWRV	0.0006	-99.9	36.5091	713	IPTNFTISVT	IPNFTISVT	IPTNFTISVT	0.0001	-99.9	34	0.0001	0	34
414	TGKIADYNYK	Sequence	TGKIADYNY	TGKIADYNY	0.0006	-99.9	36.5818	297	ETKCTLKSFT	ETKCTLKSF	ETKCTLKSF	0.0001	-99.9	34	0.0001	0	34
4	LVLLPLVSS	Sequence	LVLLPLVSS	LVLLPLVSS	0.0006	-99.9	36.5818	196	IDGYFKIY	I-DGYFKIY	IDGYFKIY	0.0001	-99.9	34.2	0.0032	0	16.1665
996	ITGRLQSL	Sequence	IT-GRLQSL	ITGRLQSL	0.0006	-99.9	36.6	966	SSNFGAIS	SSNFGAIS-	SSNFGAIS	0.0001	-99.9	34.2	0.0003	0	34.2
285	TDAVDCAL	Sequence	TDA-VDCAL	TDAVDCAL	0.0006	-99.9	36.6	982	RLDKVEAEVQ	RLDKVEAVQ	RLDKVEAEVQ	0.0001	-99.9	34.2	0.0003	0	34.2
903	YRFNGIGVTQN	Sequence	YRFNGVTQN	YRFNGIGVTQN	0.0006	-99.9	36.6182	901	MAYRFNGIGVT	MAYNGIGVT	MAYRFNGIGVT	0.0001	-99.9	34.2	0.0003	0	34.2
1062	LHVTYVPA	Sequence	LHVTYVPA-	LHVTYVPA	0.0006	-99.9	36.6182	1075	TTAPAICH	TTAPAICH-	TTAPAICH	0.0001	-99.9	34.2	0.0001	0	34.2
1056	PHGVVFLHVTY	Sequence	PHVFLHVTY	PHGVVFLHVTY	0.0006	-99.9	36.6364	530	TNLVKNKCVNF	TVKNKCVNF	TNLVKNKCVNF	0.0001	-99.9	34.2	0.0001	0	34.2
385	KLNDLCFTN	Sequence	KLNDLCFTN	KLNDLCFTN	0.0006	-99.9	36.6545	921	LIANQFNS	LIANQFNS-	LIANQFNS	0.0001	-99.9	34.2	0.0001	0	34.2
88	GVYFASTE	Sequence	GVYFASTE-	GVYFASTE	0.0006	-99.9	36.6909	960	TLVKQLSS	TLVKQLSS-	TLVKQLSS	0.0001	-99.9	34.2	0.0001	0	34.2
1099	THWFVTQR	Sequence	THWFVTQR-	THWFVTQR	0.0006	-99.9	36.7091	739	MYICGDSTEC	MYIGDSTEC	MYICGDSTEC	0.0001	-99.9	34.2	0.0001	0	34.2
1020	SANLAATK	Sequence	SANLA-ATK	SANLAATK	0.0006	-99.9	36.7273	1130	GIVNNTVYDP	GIVNNTVYP	GIVNNTVYDP	0.0001	-99.9	34.2	0	0	34.2
1209	IKWPWYIWLG	Sequence	IKWPWYIWL	IKWPWYIWL	0.0006	-99.9	36.7818	302	LKSFTVEKGIY	KSFTEKGIY	KSFTVEKGIY	0.0001	-99.9	34.4	0.0051	0	13.2255
67	IHVSGTNG	Sequence	IHVSGTNG-	IHVSGTNG	0.0006	-99.9	36.8	23	LPPAYTNSFT	LPPAYTNSF	LPPAYTNSF	0.0001	-99.9	34.4	0.0009	0	25.6762
757	SFCTQLNRAL	Sequence	SFTQLNRAL	SFCTQLNRAL	0.0006	-99.9	36.8182	798	GFNFSQIL	G-FNFSQIL	GFNFSQIL	0.0001	-99.9	34.4	0.0008	0	27.1579
450	YLYRLFRKSNL	Sequence	YRLFRKSNL	YLYRLFRKSNL	0.0006	-99.9	36.8364	389	LCFTNVYADSF	LTNVYADSF	LCFTNVYADSF	0.0001	-99.9	34.4	0.0003	0	34.4
780	VFAQVKQI	Sequence	VFAQ-VKQI	VFAQVKQI	0.0006	-99.9	36.8364	66	AIHVSGTNGT	AIVSGTNGT	AIHVSGTNGT	0.0001	-99.9	34.4	0.0002	0	34.4
104	IFGTTLDSK	Sequence	IFGTTLDSK	IFGTTLDSK	0.0006	-99.9	36.8727	1011	LIRAAEIR	LIRAAEIR-	LIRAAEIR	0.0001	-99.9	34.4	0.0001	0	34.4
455	FRKSNLKP	Sequence	FRKSNLKP-	FRKSNLKP	0.0006	-99.9	36.8727	1104	TQRNFYEPQI	TQRNFYPQI	TQRNFYEPQI	0.0001	-99.9	34.6	0.006	0	12.3408
1098	GTHWFVTQR	Sequence	GTHWFVTQR	GTHWFVTQR	0.0006	-99.9	36.8909	276	LKYNENGTIT	LYNENGTIT	LKYNENGTIT	0.0001	-99.9	34.6	0.0024	0	18.0239
227	DLPIGINITRF	Sequence	DLPIGITRF	DLPIGINITRF	0.0006	-99.9	36.9273	42	FRSSVLHSTQ	FSSVLHSTQ	FRSSVLHSTQ	0.0001	-99.9	34.6	0.0012	0	23.8028
685	SVASQSII	Sequence	SVASQS-II	SVASQSII	0.0006	-99.9	37	889	AGAALQIPFA	AAALQIPFA	AGAALQIPFA	0.0001	-99.9	34.6	0.0004	0	34.6
146	KNNKSWMES	Sequence	KNNKSWMES	KNNKSWMES	0.0006	-99.9	37	624	HADQLTPTWRV	HADTPTWRV	HADQLTPTWRV	0.0001	-99.9	34.6	0.0004	0	34.6
552	TESNKKFLP	Sequence	TESNKKFLP	TESNKKFLP	0.0006	-99.9	37.0612	44	SSVLHSTQ	SSVLHSTQ-	SSVLHSTQ	0.0001	-99.9	34.6	0.0002	0	34.6
247	YLTPGDSS	Sequence	YLTPGDSS-	YLTPGDSS	0.0006	-99.9	37.1429	121	NATNVVIK	NAT-NVVIK	NATNVVIK	0.0001	-99.9	34.6	0.0001	0	34.6
632	WRVYSTGS	Sequence	WRVYSTGS-	WRVYSTGS	0.0006	-99.9	37.1429	1011	LIRAAEIRASA	LAAEIRASA	LIRAAEIRASA	0.0001	-99.9	34.6	0.0001	0	34.6
828	ADAGFIKQYGD	Sequence	ADAGFIKQY	ADAGFIKQY	0.0006	-99.9	37.1837	975	VLNDILSRLDK	VLNDILSRK	VLNDILSRLDK	0.0001	-99.9	34.6	0.0001	0	34.6
992	IDRLITGRLQ	Sequence	IRLITGRLQ	IDRLITGRLQ	0.0006	-99.9	37.2245	533	VKNKCVNFNF	VKNKVNFNF	VKNKCVNFNF	0.0001	-99.9	34.8	0.0649	0	3.3253
775	KNTQEVFAQ	Sequence	KNTQEVFAQ	KNTQEVFAQ	0.0006	-99.9	37.2245	483	EGFNCYFPL	EGFNCYFPL	EGFNCYFPL	0.0001	-99.9	34.8	0.0005	0	32.0233
878	AGTITSGW	Sequence	AGT-ITSGW	AGTITSGW	0.0006	-99.9	37.2449	985	KVEAEVQI	KV-EAEVQI	KVEAEVQI	0.0001	-99.9	34.8	0.0003	0	34.8
591	FGGVSVITP	Sequence	FGGVSVITP	FGGVSVITP	0.0006	-99.9	37.2449	592	GGVSVITPG	GGVSVITPG	GGVSVITPG	0.0001	-99.9	34.8	0.0002	0	34.8
1184	RLNEVAKN	Sequence	RLNEVAKN-	RLNEVAKN	0.0006	-99.9	37.2449	1247	CSCGSCCKF	CSCGSCCKF	CSCGSCCKF	0.0001	-99.9	34.8	0.0002	0	34.8
911	TQNVLYENQK	Sequence	TQNLYENQK	TQNVLYENQK	0.0006	-99.9	37.2857	519	APATVCGPKK	APATVGPKK	APATVCGPKK	0.0001	-99.9	34.8	0.0002	0	34.8
587	TPCSFGGVSVI	Sequence	TSFGGVSVI	TPCSFGGVSVI	0.0006	-99.9	37.3061	203	YSKHTPIN	YSKHTPIN-	YSKHTPIN	0.0001	-99.9	34.8	0.0002	0	34.8
74	GTKRFDNPVLP	Sequence	GRFDNPVLP	GTKRFDNPVLP	0.0006	-99.9	37.3265	45	SVLHSTQDLFL	SVLHSTQFL	SVLHSTQDLFL	0.0001	-99.9	34.8	0.0001	0	34.8
738	TMYICGDSTE	Sequence	TMYIGDSTE	TMYICGDSTE	0.0006	-99.9	37.3469	93	STEKSNII	ST-EKSNII	STEKSNII	0.0001	-99.9	34.8	0.0001	0	34.8
[truncated: 3,061 more rows]
